# Supplementary material for: Transcriptome profiling in rumen, reticulum, omasum, and abomasum tissues during the developmental transition of pre-ruminant to the ruminant in yaks
Source: Frontiers journal article supplement (doi:10.3389/fvets.2023.1204706), 2023-09-22
Supplement: Data_Sheet_1.zip [file Table S4-The common DEmRNAs in rumen.xls]

gene_id	Adult_Rum-vs-G0d_Rum	G15m_Rum-vs-G0d_Rum	G20d_Rum-vs-G0d_Rum	G60d_Rum-vs-G0d_Rum	description	GO_id	GO_term	pathway	pathway_description
A2ML1	0	1	1	1	PREDICTED: alpha-2-macroglobulin-like protein 1 [Bos mutus]	GO:0070062,GO:0005615,GO:0030414,GO:0004867,GO:0052548	extracellular exosome|extracellular space|peptidase inhibitor activity|serine-type endopeptidase inhibitor activity|regulation of endopeptidase activity
AACS	1	1	0	1	PREDICTED: acetoacetyl-CoA synthetase [Bos mutus]	GO:0005829,GO:0030729,GO:0005524,GO:0047760,GO:0060612,GO:0071397,GO:0071333,GO:0071394,GO:0006631,GO:0001889,GO:0032024,GO:0042493,GO:0045471,GO:0007584,GO:0034201,GO:0014070,GO:0010243,GO:0014074,GO:0042594,GO:0050872	cytosol|acetoacetate-CoA ligase activity|ATP binding|butyrate-CoA ligase activity|adipose tissue development|cellular response to cholesterol|cellular response to glucose stimulus|cellular response to testosterone stimulus|fatty acid metabolic process|liver development|positive regulation of insulin secretion|response to drug|response to ethanol|response to nutrient|response to oleic acid|respons…	bom00280,bom00650	Valine, leucine and isoleucine degradation|Butanoate metabolism
AADACL3	1	1	0	0	PREDICTED: arylacetamide deacetylase-like 3 [Bos mutus]	GO:0016021,GO:0052689	integral component of membrane|carboxylic ester hydrolase activity
AADAT	1	1	0	0	PREDICTED: kynurenine/alpha-aminoadipate aminotransferase, mitochondrial isoform X1 [Bos mutus]	GO:0005739,GO:0047536,GO:0016212,GO:0030170,GO:0006103,GO:0009058,GO:0006536,GO:0070189,GO:0033512	mitochondrion|2-aminoadipate transaminase activity|kynurenine-oxoglutarate transaminase activity|pyridoxal phosphate binding|2-oxoglutarate metabolic process|biosynthetic process|glutamate metabolic process|kynurenine metabolic process|L-lysine catabolic process to acetyl-CoA via saccharopine	bom00310,bom00380	Lysine degradation|Tryptophan metabolism
AAK1	0	1	0	1	PREDICTED: AP2-associated protein kinase 1 [Bos mutus]	GO:0031252,GO:0005905,GO:0030136,GO:0019897,GO:0005634,GO:0043195,GO:0035612,GO:0005524,GO:0005112,GO:0004674,GO:0006897,GO:0045747,GO:0046777,GO:0006468,GO:0050821,GO:2000369,GO:0030100,GO:0032880	cell leading edge|clathrin-coated pit|clathrin-coated vesicle|extrinsic component of plasma membrane|nucleus|terminal bouton|AP-2 adaptor complex binding|ATP binding|Notch binding|protein serine/threonine kinase activity|endocytosis|positive regulation of Notch signaling pathway|protein autophosphorylation|protein phosphorylation|protein stabilization|regulation of clathrin-dependent endocytosis|…
AATK	0	1	0	0	PREDICTED: serine/threonine-protein kinase LMTK1 [Bos mutus]	GO:0016021,GO:0048471,GO:0005524,GO:0004674	integral component of membrane|perinuclear region of cytoplasm|ATP binding|protein serine/threonine kinase activity
ABCA13	0	1	0	0	PREDICTED: LOW QUALITY PROTEIN: ATP-binding cassette sub-family A member 13 [Bos mutus]			bom02010	ABC transporters
ABCA2	1	1	0	1	PREDICTED: LOW QUALITY PROTEIN: ATP-binding cassette sub-family A member 2 [Bos mutus]			bom02010,bom04142	ABC transporters|Lysosome
ABCA3	0	1	0	0	PREDICTED: ATP-binding cassette sub-family A member 3 [Bos mutus]			bom02010	ABC transporters
ABCA7	1	0	0	0	PREDICTED: ATP-binding cassette sub-family A member 7 [Bos mutus]			bom02010	ABC transporters
ABCB11	0	1	0	0	PREDICTED: bile salt export pump isoform X1 [Bos mutus]			bom01522,bom02010,bom04976,bom04979	Endocrine resistance|ABC transporters|Bile secretion|Cholesterol metabolism
ABCB4	1	0	0	0	hypothetical protein [Bos mutus]	GO:0016324,GO:0030136,GO:0000139,GO:0016021,GO:0045121,GO:0005524,GO:0042626,GO:0008525,GO:0090554,GO:0008559,GO:0032782,GO:1903413,GO:0055088,GO:0032376,GO:0061092,GO:2001140,GO:0042493,GO:1901557,GO:0051384	apical plasma membrane|clathrin-coated vesicle|Golgi membrane|integral component of membrane|membrane raft|ATP binding|ATPase activity, coupled to transmembrane movement of substances|phosphatidylcholine transporter activity|phosphatidylcholine-translocating ATPase activity|xenobiotic transmembrane transporting ATPase activity|bile acid secretion|cellular response to bile acid|lipid homeostasis|p…	bom02010,bom04976	ABC transporters|Bile secretion
ABCB6	1	1	1	1	ATP-binding cassette sub-family B member 6, mitochondrial [Bos taurus]	GO:0005829,GO:0005783,GO:0005789,GO:0005768,GO:0010008,GO:0005794,GO:0000139,GO:0031307,GO:0005740,GO:0005741,GO:0005739,GO:0005654,GO:0005886,GO:0005524,GO:0015562,GO:0020037,GO:0015439,GO:0007420,GO:0015886,GO:0006779,GO:0043588	cytosol|endoplasmic reticulum|endoplasmic reticulum membrane|endosome|endosome membrane|Golgi apparatus|Golgi membrane|integral component of mitochondrial outer membrane|mitochondrial envelope|mitochondrial outer membrane|mitochondrion|nucleoplasm|plasma membrane|ATP binding|efflux transmembrane transporter activity|heme binding|heme-transporting ATPase activity|brain development|heme transport|p…	bom02010	ABC transporters
ABCC4	0	1	0	0	PREDICTED: multidrug resistance-associated protein 4 isoform X1 [Bos mutus]			bom01523,bom02010,bom04024,bom04976	Antifolate resistance|ABC transporters|cAMP signaling pathway|Bile secretion
ABCC8	0	1	0	0	PREDICTED: LOW QUALITY PROTEIN: ATP-binding cassette sub-family C member 8 [Bos mutus]			bom02010,bom04911,bom04930	ABC transporters|Insulin secretion|Type II diabetes mellitus
ABCD3	0	1	0	1	PREDICTED: ATP-binding cassette sub-family D member 3 isoform X3 [Bos mutus]			bom02010,bom04146	ABC transporters|Peroxisome
ABHD1	1	1	0	1	hypothetical protein [Bos mutus]	GO:0016021,GO:0047372,GO:0016298,GO:0034338,GO:0044255,GO:0051792,GO:0051793	integral component of membrane|acylglycerol lipase activity|lipase activity|short-chain carboxylesterase activity|cellular lipid metabolic process|medium-chain fatty acid biosynthetic process|medium-chain fatty acid catabolic process
ABHD11	1	1	0	0	Abhydrolase domain-containing protein 11, partial [Bos mutus]	GO:0005739,GO:0016787	mitochondrion|hydrolase activity
ABHD12	0	0	0	1	PREDICTED: monoacylglycerol lipase ABHD12 [Bos mutus]	GO:0032281,GO:0032839,GO:0016021,GO:0047372,GO:0004622,GO:0008474,GO:0046464,GO:0007628,GO:0052651,GO:0006660,GO:0002084,GO:0010996	AMPA glutamate receptor complex|dendrite cytoplasm|integral component of membrane|acylglycerol lipase activity|lysophospholipase activity|palmitoyl-(protein) hydrolase activity|acylglycerol catabolic process|adult walking behavior|monoacylglycerol catabolic process|phosphatidylserine catabolic process|protein depalmitoylation|response to auditory stimulus
ABHD17B	0	1	0	0	alpha/beta hydrolase domain-containing protein 17B isoform X1 [Delphinapterus leucas]	GO:0099031,GO:0099033,GO:0030054,GO:0043197,GO:0098978,GO:0016020,GO:0055038,GO:0008474,GO:1902817,GO:1905668,GO:0002084,GO:0018345,GO:1902950,GO:1902473	anchored component of postsynaptic density membrane|anchored component of postsynaptic recycling endosome membrane|cell junction|dendritic spine|glutamatergic synapse|membrane|recycling endosome membrane|palmitoyl-(protein) hydrolase activity|negative regulation of protein localization to microtubule|positive regulation of protein localization to endosome|protein depalmitoylation|protein palmitoy…
ABHD17C	1	1	1	1	PREDICTED: protein ABHD17C [Callithrix jacchus]	GO:0030054,GO:0043197,GO:0098978,GO:0014069,GO:0045211,GO:0055038,GO:0008474,GO:1902817,GO:1905668,GO:0002084,GO:0018345,GO:0099175	cell junction|dendritic spine|glutamatergic synapse|postsynaptic density|postsynaptic membrane|recycling endosome membrane|palmitoyl-(protein) hydrolase activity|negative regulation of protein localization to microtubule|positive regulation of protein localization to endosome|protein depalmitoylation|protein palmitoylation|regulation of postsynapse organization
ABHD18	1	1	1	1	PREDICTED: uncharacterized protein C4orf29 homolog [Bos mutus]	GO:0005576	extracellular region
ABHD3	0	1	1	1	PREDICTED: phospholipase ABHD3 isoform X1 [Bos mutus]	GO:0016021,GO:0052740,GO:0047372,GO:0016298,GO:0052739,GO:0008970,GO:0004623,GO:0102567,GO:0102568,GO:0034338,GO:0044255,GO:0051792,GO:0051793,GO:0046470	integral component of membrane|1-acyl-2-lysophosphatidylserine acylhydrolase activity|acylglycerol lipase activity|lipase activity|phosphatidylserine 1-acylhydrolase activity|phospholipase A1 activity|phospholipase A2 activity|phospholipase A2 activity (consuming 1,2-dipalmitoylphosphatidylcholine)|phospholipase A2 activity consuming 1,2-dioleoylphosphatidylethanolamine)|short-chain carboxylester…
ABHD5	0	1	0	0	PREDICTED: 1-acylglycerol-3-phosphate O-acyltransferase ABHD5 [Bos mutus]	GO:0005829,GO:0005811,GO:0003841,GO:0030154,GO:0006631,GO:0010891,GO:0006654,GO:0051006,GO:0010898	cytosol|lipid droplet|1-acylglycerol-3-phosphate O-acyltransferase activity|cell differentiation|fatty acid metabolic process|negative regulation of sequestering of triglyceride|phosphatidic acid biosynthetic process|positive regulation of lipoprotein lipase activity|positive regulation of triglyceride catabolic process	bom04923	Regulation of lipolysis in adipocytes
ABHD6	1	1	1	1	monoacylglycerol lipase ABHD6 isoform X1 [Odocoileus virginianus texanus]	GO:0032281,GO:0098982,GO:0098978,GO:0016021,GO:0099055,GO:0005739,GO:0047372,GO:0004620,GO:0046464,GO:0060292,GO:0030336,GO:0120163,GO:0009395,GO:0046889,GO:2000124	AMPA glutamate receptor complex|GABA-ergic synapse|glutamatergic synapse|integral component of membrane|integral component of postsynaptic membrane|mitochondrion|acylglycerol lipase activity|phospholipase activity|acylglycerol catabolic process|long-term synaptic depression|negative regulation of cell migration|negative regulation of cold-induced thermogenesis|phospholipid catabolic process|posit…	bom04723	Retrograde endocannabinoid signaling
ABI2	0	0	0	1	abl interactor 2 isoform X2 [Odocoileus virginianus texanus]	GO:0005913,GO:0005737,GO:0005856,GO:0005829,GO:0030425,GO:0032433,GO:0030027,GO:0005634,GO:0031209,GO:0008093,GO:0003677,GO:0019900,GO:0070064,GO:0044877,GO:0017124,GO:0031625,GO:0008154,GO:0043010,GO:0016477,GO:0007010,GO:0016358,GO:0007611,GO:0018108,GO:2000601,GO:0016601,GO:0016032	cell-cell adherens junction|cytoplasm|cytoskeleton|cytosol|dendrite|filopodium tip|lamellipodium|nucleus|SCAR complex|cytoskeletal adaptor activity|DNA binding|kinase binding|proline-rich region binding|protein-containing complex binding|SH3 domain binding|ubiquitin protein ligase binding|actin polymerization or depolymerization|camera-type eye development|cell migration|cytoskeleton organization…	bom04810	Regulation of actin cytoskeleton
ABLIM3	0	0	0	1	PREDICTED: actin-binding LIM protein 3 isoform X1 [Bos mutus]	GO:0015629,GO:0005737,GO:0098978,GO:0030027,GO:0001725,GO:0051015,GO:0046872,GO:0030036,GO:0060271,GO:0030032,GO:1903955,GO:0045944,GO:0006351	actin cytoskeleton|cytoplasm|glutamatergic synapse|lamellipodium|stress fiber|actin filament binding|metal ion binding|actin cytoskeleton organization|cilium assembly|lamellipodium assembly|positive regulation of protein targeting to mitochondrion|positive regulation of transcription by RNA polymerase II|transcription, DNA-templated	bom04360	Axon guidance
ABO	0	0	1	0	PREDICTED: histo-blood group ABO system transferase [Bos mutus]	GO:0005576,GO:0005794,GO:0032580,GO:0016021,GO:0031982,GO:0004381,GO:0004380,GO:0046872,GO:0016757,GO:0005975,GO:0042742,GO:0030259,GO:0006486	extracellular region|Golgi apparatus|Golgi cisterna membrane|integral component of membrane|vesicle|fucosylgalactoside 3-alpha-galactosyltransferase activity|glycoprotein-fucosylgalactoside alpha-N-acetylgalactosaminyltransferase activity|metal ion binding|transferase activity, transferring glycosyl groups|carbohydrate metabolic process|defense response to bacterium|lipid glycosylation|protein gl…	bom00601	Glycosphingolipid biosynthesis - lacto and neolacto series
ACAA2	1	1	0	1	PREDICTED: 3-ketoacyl-CoA thiolase, mitochondrial [Bos mutus]	GO:0005739,GO:0003988,GO:0071456,GO:0006635,GO:1902109,GO:1901029	mitochondrion|acetyl-CoA C-acyltransferase activity|cellular response to hypoxia|fatty acid beta-oxidation|negative regulation of mitochondrial membrane permeability involved in apoptotic process|negative regulation of mitochondrial outer membrane permeabilization involved in apoptotic signaling pathway	bom00062,bom00071,bom00280	Fatty acid elongation|Fatty acid degradation|Valine, leucine and isoleucine degradation
ACADS	1	1	1	1	hypothetical protein [Bos mutus]	GO:0005759,GO:0005739,GO:0003995,GO:0004085,GO:0050660,GO:0046359	mitochondrial matrix|mitochondrion|acyl-CoA dehydrogenase activity|butyryl-CoA dehydrogenase activity|flavin adenine dinucleotide binding|butyrate catabolic process	bom00071,bom00280,bom00410,bom00640,bom00650	Fatty acid degradation|Valine, leucine and isoleucine degradation|beta-Alanine metabolism|Propanoate metabolism|Butanoate metabolism
ACADSB	1	1	0	1	PREDICTED: short/branched chain specific acyl-CoA dehydrogenase, mitochondrial [Bos mutus]	GO:0005759,GO:0005739,GO:0003995,GO:0050660,GO:0006631	mitochondrial matrix|mitochondrion|acyl-CoA dehydrogenase activity|flavin adenine dinucleotide binding|fatty acid metabolic process	bom00071,bom00280	Fatty acid degradation|Valine, leucine and isoleucine degradation
ACAN	1	1	0	0	PREDICTED: aggrecan core protein [Bos mutus]	GO:0031012,GO:0005576,GO:0005509,GO:0030246,GO:0005540,GO:0007155,GO:0007417	extracellular matrix|extracellular region|calcium ion binding|carbohydrate binding|hyaluronic acid binding|cell adhesion|central nervous system development
ACAT1	0	1	0	0	acetyl-CoA acetyltransferase, mitochondrial precursor [Bos taurus]	GO:0005739,GO:0003985,GO:0003988,GO:0016830,GO:0016885,GO:0046872,GO:0006085,GO:0046356,GO:0015937,GO:0006635,GO:0006550,GO:0046952,GO:1902860	mitochondrion|acetyl-CoA C-acetyltransferase activity|acetyl-CoA C-acyltransferase activity|carbon-carbon lyase activity|ligase activity, forming carbon-carbon bonds|metal ion binding|acetyl-CoA biosynthetic process|acetyl-CoA catabolic process|coenzyme A biosynthetic process|fatty acid beta-oxidation|isoleucine catabolic process|ketone body catabolic process|propionyl-CoA biosynthetic process	bom00071,bom00072,bom00280,bom00310,bom00380,bom00620,bom00630,bom00640,bom00650,bom00900,bom04975	Fatty acid degradation|Synthesis and degradation of ketone bodies|Valine, leucine and isoleucine degradation|Lysine degradation|Tryptophan metabolism|Pyruvate metabolism|Glyoxylate and dicarboxylate metabolism|Propanoate metabolism|Butanoate metabolism|Terpenoid backbone biosynthesis|Fat digestion and absorption
ACAT2	0	1	0	0	PREDICTED: acetyl-CoA acetyltransferase, cytosolic isoform X1 [Bos mutus]	GO:0005737,GO:0005829,GO:0070062,GO:0005739,GO:0005730,GO:0005634,GO:0003857,GO:0003985,GO:0003988,GO:0004300,GO:0006695,GO:0006696,GO:0006635,GO:0006629	cytoplasm|cytosol|extracellular exosome|mitochondrion|nucleolus|nucleus|3-hydroxyacyl-CoA dehydrogenase activity|acetyl-CoA C-acetyltransferase activity|acetyl-CoA C-acyltransferase activity|enoyl-CoA hydratase activity|cholesterol biosynthetic process|ergosterol biosynthetic process|fatty acid beta-oxidation|lipid metabolic process	bom00071,bom00072,bom00280,bom00310,bom00380,bom00620,bom00630,bom00640,bom00650,bom00900,bom04975	Fatty acid degradation|Synthesis and degradation of ketone bodies|Valine, leucine and isoleucine degradation|Lysine degradation|Tryptophan metabolism|Pyruvate metabolism|Glyoxylate and dicarboxylate metabolism|Propanoate metabolism|Butanoate metabolism|Terpenoid backbone biosynthesis|Fat digestion and absorption
ACE2	1	1	0	0	PREDICTED: angiotensin-converting enzyme 2 [Bos mutus]	GO:0031526,GO:0009986,GO:0005737,GO:0005615,GO:0016021,GO:0005886,GO:0004180,GO:0004175,GO:0008238,GO:0046872,GO:0008237,GO:0008241,GO:0001618,GO:0003051,GO:0051957,GO:0060452,GO:1903598,GO:0032800,GO:0046813,GO:1903779,GO:0003081,GO:0015827	brush border membrane|cell surface|cytoplasm|extracellular space|integral component of membrane|plasma membrane|carboxypeptidase activity|endopeptidase activity|exopeptidase activity|metal ion binding|metallopeptidase activity|peptidyl-dipeptidase activity|virus receptor activity|angiotensin-mediated drinking behavior|positive regulation of amino acid transport|positive regulation of cardiac musc…	bom04614,bom04974,bom05171	Renin-angiotensin system|Protein digestion and absorption|Coronavirus disease - COVID-19
ACHE	1	1	0	0	PREDICTED: acetylcholinesterase isoform X1 [Bos mutus]	GO:0031225,GO:0030054,GO:0005576,GO:0005886,GO:0045202,GO:0003990,GO:0001540,GO:0042135	anchored component of membrane|cell junction|extracellular region|plasma membrane|synapse|acetylcholinesterase activity|amyloid-beta binding|neurotransmitter catabolic process	bom00564,bom04725	Glycerophospholipid metabolism|Cholinergic synapse
ACKR1	1	1	1	1	atypical chemokine receptor 1 [Bos indicus x Bos taurus]	GO:0005769,GO:0016021,GO:0055037,GO:0019957,GO:0004930,GO:0070098,GO:0006954,GO:0032642	early endosome|integral component of membrane|recycling endosome|C-C chemokine binding|G protein-coupled receptor activity|chemokine-mediated signaling pathway|inflammatory response|regulation of chemokine production	bom05144	Malaria
ACKR4	0	1	0	0	PREDICTED: atypical chemokine receptor 4 [Bos mutus]	GO:0005769,GO:0009897,GO:0016021,GO:0055037,GO:0019957,GO:0016493,GO:0019956,GO:0004950,GO:0005044,GO:0019722,GO:0060326,GO:0006935,GO:0006955,GO:0007204	early endosome|external side of plasma membrane|integral component of membrane|recycling endosome|C-C chemokine binding|C-C chemokine receptor activity|chemokine binding|chemokine receptor activity|scavenger receptor activity|calcium-mediated signaling|cell chemotaxis|chemotaxis|immune response|positive regulation of cytosolic calcium ion concentration	bom04060,bom04061	Cytokine-cytokine receptor interaction|Viral protein interaction with cytokine and cytokine receptor
ACO1	0	1	0	0	hypothetical protein [Bos mutus]	GO:0005737,GO:0005829,GO:0005739,GO:0051538,GO:0051539,GO:0003994,GO:0008198,GO:0030350,GO:0006879,GO:0006101,GO:0010040,GO:0006099	cytoplasm|cytosol|mitochondrion|3 iron, 4 sulfur cluster binding|4 iron, 4 sulfur cluster binding|aconitate hydratase activity|ferrous iron binding|iron-responsive element binding|cellular iron ion homeostasis|citrate metabolic process|response to iron(II) ion|tricarboxylic acid cycle	bom00020,bom00630	Citrate cycle (TCA cycle)|Glyoxylate and dicarboxylate metabolism
ACOT6	0	1	1	0	PREDICTED: putative acyl-coenzyme A thioesterase 6 [Bos mutus]	GO:0005777,GO:0047617,GO:0052689,GO:0006637,GO:0006631	peroxisome|acyl-CoA hydrolase activity|carboxylic ester hydrolase activity|acyl-CoA metabolic process|fatty acid metabolic process
ACOT8	0	1	0	0	PREDICTED: acyl-coenzyme A thioesterase 8 [Bos mutus]	GO:0005829,GO:0005782,GO:0003986,GO:0047617,GO:0052689,GO:0033882,GO:0016289,GO:0052815,GO:0016290,GO:0005102,GO:0006637,GO:0036109,GO:0006699,GO:0043649,GO:0033540,GO:0009062,GO:0045225,GO:0016559,GO:0006625,GO:0016032	cytosol|peroxisomal matrix|acetyl-CoA hydrolase activity|acyl-CoA hydrolase activity|carboxylic ester hydrolase activity|choloyl-CoA hydrolase activity|CoA hydrolase activity|medium-chain acyl-CoA hydrolase activity|palmitoyl-CoA hydrolase activity|signaling receptor binding|acyl-CoA metabolic process|alpha-linolenic acid metabolic process|bile acid biosynthetic process|dicarboxylic acid cataboli…	bom00120,bom04146	Primary bile acid biosynthesis|Peroxisome
ACOX2	0	1	0	1	PREDICTED: peroxisomal acyl-coenzyme A oxidase 2 isoform X2 [Bison bison bison]	GO:0005829,GO:0043231,GO:0005782,GO:0005777,GO:0033791,GO:0003997,GO:0071949,GO:0005504,GO:0050660,GO:0016402,GO:0042803,GO:0005102,GO:0006699,GO:0033540,GO:0055088,GO:0010942,GO:1902884,GO:0006625	cytosol|intracellular membrane-bounded organelle|peroxisomal matrix|peroxisome|3alpha,7alpha,12alpha-trihydroxy-5beta-cholestanoyl-CoA 24-hydroxylase activity|acyl-CoA oxidase activity|FAD binding|fatty acid binding|flavin adenine dinucleotide binding|pristanoyl-CoA oxidase activity|protein homodimerization activity|signaling receptor binding|bile acid biosynthetic process|fatty acid beta-oxidati…	bom00120,bom03320,bom04146	Primary bile acid biosynthesis|PPAR signaling pathway|Peroxisome
ACP5	0	1	1	0	PREDICTED: tartrate-resistant acid phosphatase type 5 [Bos mutus]	GO:0005576,GO:0005764,GO:0003993,GO:0008199,GO:0008198,GO:0060349,GO:0045453,GO:0050830,GO:0006811,GO:0055072,GO:0050728,GO:0032691,GO:0032695,GO:0045019,GO:0032929,GO:0032720,GO:0001503,GO:0034097,GO:0032496	extracellular region|lysosome|acid phosphatase activity|ferric iron binding|ferrous iron binding|bone morphogenesis|bone resorption|defense response to Gram-positive bacterium|ion transport|iron ion homeostasis|negative regulation of inflammatory response|negative regulation of interleukin-1 beta production|negative regulation of interleukin-12 production|negative regulation of nitric oxide biosy…	bom00740,bom04142,bom04380,bom05323	Riboflavin metabolism|Lysosome|Osteoclast differentiation|Rheumatoid arthritis
ACP6	0	1	0	0	PREDICTED: lysophosphatidic acid phosphatase type 6 isoform X1 [Bos mutus]	GO:0005739,GO:0003993,GO:0052642,GO:0002244,GO:2001311	mitochondrion|acid phosphatase activity|lysophosphatidic acid phosphatase activity|hematopoietic progenitor cell differentiation|lysobisphosphatidic acid metabolic process
ACPP	0	1	1	1	PREDICTED: prostatic acid phosphatase isoform X2 [Bos mutus]	GO:0005615,GO:0030175,GO:0016021,GO:0005622,GO:0005886,GO:0012506,GO:0008253,GO:0003993,GO:0052642,GO:0016791,GO:0042803,GO:0042131,GO:0046085,GO:0016311,GO:0009117,GO:0060168,GO:0051289,GO:0006144,GO:0051930,GO:0006772	extracellular space|filopodium|integral component of membrane|intracellular|plasma membrane|vesicle membrane|5'-nucleotidase activity|acid phosphatase activity|lysophosphatidic acid phosphatase activity|phosphatase activity|protein homodimerization activity|thiamine phosphate phosphatase activity|adenosine metabolic process|dephosphorylation|nucleotide metabolic process|positive regulation of ade…
ACRBP	0	0	0	1	acrosin-binding protein isoform X1 [Bos taurus]	GO:0002080,GO:0001669,GO:0005576,GO:0005634	acrosomal membrane|acrosomal vesicle|extracellular region|nucleus
ACSBG1	1	0	0	0	PREDICTED: long-chain-fatty-acid--CoA ligase ACSBG1 isoform X1 [Bos mutus]	GO:0031410,GO:0005783,GO:0005524,GO:0102391,GO:0004467,GO:0031957,GO:0051384,GO:0000038	cytoplasmic vesicle|endoplasmic reticulum|ATP binding|decanoate-CoA ligase activity|long-chain fatty acid-CoA ligase activity|very long-chain fatty acid-CoA ligase activity|response to glucocorticoid|very long-chain fatty acid metabolic process	bom00061,bom00071,bom03320,bom04920	Fatty acid biosynthesis|Fatty acid degradation|PPAR signaling pathway|Adipocytokine signaling pathway
ACSF2	0	0	0	1	PREDICTED: acyl-CoA synthetase family member 2, mitochondrial isoform X1 [Bos mutus]	GO:0005739,GO:0005524,GO:0016874,GO:0006631	mitochondrion|ATP binding|ligase activity|fatty acid metabolic process
ACSF3	1	1	0	1	PREDICTED: acyl-CoA synthetase family member 3, mitochondrial [Bos mutus]	GO:0005739,GO:0005524,GO:0090409,GO:0031957,GO:0006633,GO:0090410	mitochondrion|ATP binding|malonyl-CoA synthetase activity|very long-chain fatty acid-CoA ligase activity|fatty acid biosynthetic process|malonate catabolic process	bom00061,bom00280	Fatty acid biosynthesis|Valine, leucine and isoleucine degradation
ACSL5	0	1	0	0	long-chain-fatty-acid--CoA ligase 5 isoform X1 [Bubalus bubalis]	GO:0005789,GO:0016021,GO:0005741,GO:0005739,GO:0005524,GO:0102391,GO:0004467,GO:0032869,GO:0006631,GO:0015908,GO:0035338,GO:0008654,GO:0032000,GO:0010747,GO:0010867,GO:0070723,GO:0009749,GO:0007584,GO:0009744	endoplasmic reticulum membrane|integral component of membrane|mitochondrial outer membrane|mitochondrion|ATP binding|decanoate-CoA ligase activity|long-chain fatty acid-CoA ligase activity|cellular response to insulin stimulus|fatty acid metabolic process|fatty acid transport|long-chain fatty-acyl-CoA biosynthetic process|phospholipid biosynthetic process|positive regulation of fatty acid beta-ox…	bom00061,bom00071,bom03320,bom04146,bom04216,bom04714,bom04920	Fatty acid biosynthesis|Fatty acid degradation|PPAR signaling pathway|Peroxisome|Ferroptosis|Thermogenesis|Adipocytokine signaling pathway
ACSL6	0	1	1	0	PREDICTED: LOW QUALITY PROTEIN: long-chain-fatty-acid--CoA ligase 6 [Bos mutus]	GO:0005789,GO:0016021,GO:0016020,GO:0005741,GO:0005778,GO:0005886,GO:0005524,GO:0102391,GO:0019899,GO:0004467,GO:0042803,GO:0006637,GO:0001676,GO:0035338,GO:0007405	endoplasmic reticulum membrane|integral component of membrane|membrane|mitochondrial outer membrane|peroxisomal membrane|plasma membrane|ATP binding|decanoate-CoA ligase activity|enzyme binding|long-chain fatty acid-CoA ligase activity|protein homodimerization activity|acyl-CoA metabolic process|long-chain fatty acid metabolic process|long-chain fatty-acyl-CoA biosynthetic process|neuroblast prol…	bom00061,bom00071,bom03320,bom04146,bom04216,bom04714,bom04920	Fatty acid biosynthesis|Fatty acid degradation|PPAR signaling pathway|Peroxisome|Ferroptosis|Thermogenesis|Adipocytokine signaling pathway
ACSS2	1	1	0	1	acetyl-coenzyme A synthetase, cytoplasmic isoform X1 [Bos taurus]	GO:0005737,GO:0005829,GO:0043231,GO:0005759,GO:0005654,GO:0003987,GO:0016208,GO:0005524,GO:0019413,GO:0019427,GO:0006069,GO:0008610,GO:0019542	cytoplasm|cytosol|intracellular membrane-bounded organelle|mitochondrial matrix|nucleoplasm|acetate-CoA ligase activity|AMP binding|ATP binding|acetate biosynthetic process|acetyl-CoA biosynthetic process from acetate|ethanol oxidation|lipid biosynthetic process|propionate biosynthetic process	bom00010,bom00620,bom00630,bom00640	Glycolysis / Gluconeogenesis|Pyruvate metabolism|Glyoxylate and dicarboxylate metabolism|Propanoate metabolism
ACTA2	1	1	0	0	actin, aortic smooth muscle [Delphinapterus leucas]	GO:0015629,GO:0044297,GO:0005737,GO:0030175,GO:0030027,GO:0001725,GO:0005524,GO:0090131,GO:0006936,GO:0070374,GO:0010628,GO:2000491,GO:0061874,GO:0061870,GO:0061041	actin cytoskeleton|cell body|cytoplasm|filopodium|lamellipodium|stress fiber|ATP binding|mesenchyme migration|muscle contraction|positive regulation of ERK1 and ERK2 cascade|positive regulation of gene expression|positive regulation of hepatic stellate cell activation|positive regulation of hepatic stellate cell contraction|positive regulation of hepatic stellate cell migration|regulation of woun…	bom04270,bom04371,bom04926	Vascular smooth muscle contraction|Apelin signaling pathway|Relaxin signaling pathway
ACTL6B	0	1	0	0	PREDICTED: actin-like protein 6B [Marmota marmota marmota]	GO:0071565,GO:0005730,GO:0016514,GO:0006338,GO:0007399	nBAF complex|nucleolus|SWI/SNF complex|chromatin remodeling|nervous system development	bom04714,bom05225	Thermogenesis|Hepatocellular carcinoma
ACTR1B	0	1	0	0	beta-centractin [Bos taurus]	GO:0005737,GO:0005869,GO:0005815,GO:0005524	cytoplasm|dynactin complex|microtubule organizing center|ATP binding	bom05014,bom05016,bom05022,bom05132	Amyotrophic lateral sclerosis|Huntington disease|Pathways of neurodegeneration - multiple diseases|Salmonella infection
ADA	1	1	0	0	adenosine deaminase, isoform CRA_a, partial [Homo sapiens]			bom00230,bom05340	Purine metabolism|Primary immunodeficiency
ADAM23	0	1	0	0	disintegrin and metalloproteinase domain-containing protein 23 [Bos taurus]
ADAMTS1	0	1	0	0	PREDICTED: A disintegrin and metalloproteinase with thrombospondin motifs 1 [Bos mutus]
ADAMTS10	0	1	0	0	PREDICTED: A disintegrin and metalloproteinase with thrombospondin motifs 10 [Bos mutus]	GO:0062023,GO:0001527,GO:0046872,GO:0004222	collagen-containing extracellular matrix|microfibril|metal ion binding|metalloendopeptidase activity
ADAMTS15	1	1	0	0	PREDICTED: A disintegrin and metalloproteinase with thrombospondin motifs 15 [Bos mutus]	GO:0009986,GO:0062023,GO:0005615,GO:0050840,GO:0008201,GO:0004222,GO:0008270	cell surface|collagen-containing extracellular matrix|extracellular space|extracellular matrix binding|heparin binding|metalloendopeptidase activity|zinc ion binding
ADAMTS18	1	1	0	0	PREDICTED: A disintegrin and metalloproteinase with thrombospondin motifs 18 [Bos mutus]	GO:0005576,GO:0046872,GO:0004222,GO:0001654,GO:0090331	extracellular region|metal ion binding|metalloendopeptidase activity|eye development|negative regulation of platelet aggregation
ADAMTS19	1	1	0	0	PREDICTED: A disintegrin and metalloproteinase with thrombospondin motifs 19 [Bos mutus]	GO:0005576,GO:0046872,GO:0004222	extracellular region|metal ion binding|metalloendopeptidase activity
ADAMTS2	1	1	0	0	PREDICTED: A disintegrin and metalloproteinase with thrombospondin motifs 2 [Bos mutus]	GO:0062023,GO:0004222,GO:0008270,GO:0032964,GO:0030574,GO:0030199,GO:0030324,GO:0016485,GO:0043588,GO:0007283,GO:0097435	collagen-containing extracellular matrix|metalloendopeptidase activity|zinc ion binding|collagen biosynthetic process|collagen catabolic process|collagen fibril organization|lung development|protein processing|skin development|spermatogenesis|supramolecular fiber organization
ADAMTS4	1	1	1	1	PREDICTED: A disintegrin and metalloproteinase with thrombospondin motifs 4 [Bos mutus]	GO:0005576,GO:0046872,GO:0004222,GO:0008237	extracellular region|metal ion binding|metalloendopeptidase activity|metallopeptidase activity
ADAMTS6	0	0	0	1	A disintegrin and metalloproteinase with thrombospondin motifs 6 precursor [Bos taurus]	GO:0005576,GO:0046872,GO:0004222,GO:0008237,GO:0035904,GO:0003279,GO:0060976	extracellular region|metal ion binding|metalloendopeptidase activity|metallopeptidase activity|aorta development|cardiac septum development|coronary vasculature development
ADAMTS8	0	1	0	0	PREDICTED: A disintegrin and metalloproteinase with thrombospondin motifs 8, partial [Bos mutus]	GO:0062023,GO:0008201,GO:0005178,GO:0009673,GO:0004222,GO:0008237,GO:0008270,GO:0008285	collagen-containing extracellular matrix|heparin binding|integrin binding|low-affinity phosphate transmembrane transporter activity|metalloendopeptidase activity|metallopeptidase activity|zinc ion binding|negative regulation of cell proliferation
ADAMTS9	1	1	0	0	PREDICTED: A disintegrin and metalloproteinase with thrombospondin motifs 9 isoform X2 [Bos mutus]	GO:0009986,GO:0005783,GO:0031012,GO:0005615,GO:0043231,GO:0004222,GO:0008237,GO:0008270,GO:0035909,GO:0090673,GO:0030198,GO:0006516,GO:0003179,GO:0007275,GO:0010596,GO:1903671,GO:0045636,GO:0015031,GO:0006508,GO:0009617,GO:0003229,GO:0016192	cell surface|endoplasmic reticulum|extracellular matrix|extracellular space|intracellular membrane-bounded organelle|metalloendopeptidase activity|metallopeptidase activity|zinc ion binding|aorta morphogenesis|endothelial cell-matrix adhesion|extracellular matrix organization|glycoprotein catabolic process|heart valve morphogenesis|multicellular organism development|negative regulation of endothe…
ADAMTSL1	1	1	0	0	PREDICTED: ADAMTS-like protein 1 [Bos mutus]	GO:0005788,GO:0005576,GO:0008233	endoplasmic reticulum lumen|extracellular region|peptidase activity
ADAMTSL3	0	1	0	0	PREDICTED: ADAMTS-like protein 3, partial [Bos mutus]	GO:0005576,GO:0043231,GO:0008233	extracellular region|intracellular membrane-bounded organelle|peptidase activity
ADAMTSL4	1	1	0	1	PREDICTED: ADAMTS-like protein 4 isoform X1 [Capra hircus]	GO:0005788,GO:0005614,GO:0008233,GO:0002020,GO:0006915,GO:0002064,GO:0030198,GO:0043065	endoplasmic reticulum lumen|interstitial matrix|peptidase activity|protease binding|apoptotic process|epithelial cell development|extracellular matrix organization|positive regulation of apoptotic process
ADAMTSL5	1	1	1	1	PREDICTED: ADAMTS-like protein 5 [Bos mutus]	GO:0031012,GO:0005576,GO:0001527,GO:0008201	extracellular matrix|extracellular region|microfibril|heparin binding
ADAP1	0	1	0	1	arf-GAP with dual PH domain-containing protein 1 isoform X3 [Bos indicus x Bos taurus]	GO:0005737,GO:0005829,GO:0005634,GO:0005886,GO:0005096,GO:0043533,GO:0046872,GO:1902936,GO:0005547,GO:0007166,GO:0043087	cytoplasm|cytosol|nucleus|plasma membrane|GTPase activator activity|inositol 1,3,4,5 tetrakisphosphate binding|metal ion binding|phosphatidylinositol bisphosphate binding|phosphatidylinositol-3,4,5-trisphosphate binding|cell surface receptor signaling pathway|regulation of GTPase activity
ADCY3	1	1	0	0	PREDICTED: adenylate cyclase type 3 [Bos mutus]	GO:0005929,GO:0005737,GO:0005794,GO:0016021,GO:0005887,GO:0016020,GO:0005886,GO:0004016,GO:0005524,GO:0005516,GO:0046872,GO:0007340,GO:0007189,GO:0007193,GO:0006171,GO:1904322,GO:0071377,GO:0030317,GO:0007186,GO:0008355,GO:0003091,GO:0007608,GO:0007165,GO:0007338	cilium|cytoplasm|Golgi apparatus|integral component of membrane|integral component of plasma membrane|membrane|plasma membrane|adenylate cyclase activity|ATP binding|calmodulin binding|metal ion binding|acrosome reaction|adenylate cyclase-activating G protein-coupled receptor signaling pathway|adenylate cyclase-inhibiting G protein-coupled receptor signaling pathway|cAMP biosynthetic process|cell…	bom00230,bom01522,bom04015,bom04020,bom04022,bom04024,bom04062,bom04072,bom04114,bom04211,bom04213,bom04261,bom04270,bom04371,bom04540,bom04611,bom04713,bom04714,bom04723,bom04724,bom04725,bom04727,bom04740,bom04750,bom04911,bom04912,bom04913,bom04914,bom04915,bom04916,bom04918,bom04921,bom04923,bom04925,bom04926,bom04927,bom04928,bom04934,bom04935,bom04962,bom04970,bom04971,bom04972,bom04976,bom…	Purine metabolism|Endocrine resistance|Rap1 signaling pathway|Calcium signaling pathway|cGMP-PKG signaling pathway|cAMP signaling pathway|Chemokine signaling pathway|Phospholipase D signaling pathway|Oocyte meiosis|Longevity regulating pathway|Longevity regulating pathway - multiple species|Adrenergic signaling in cardiomyocytes|Vascular smooth muscle contraction|Apelin signaling pathway|Gap junc…
ADCY5	0	1	0	0	PREDICTED: adenylate cyclase type 5, partial [Bos mutus]	GO:0005929,GO:0016021,GO:0005887,GO:0045111,GO:0005886,GO:0004016,GO:0008179,GO:0005524,GO:0046872,GO:0046982,GO:0097110,GO:0001973,GO:0007191,GO:0007189,GO:0007195,GO:0007193,GO:0006171,GO:1904322,GO:0071377,GO:0007186,GO:0007626,GO:0050885,GO:0007204,GO:0061178,GO:0003091	cilium|integral component of membrane|integral component of plasma membrane|intermediate filament cytoskeleton|plasma membrane|adenylate cyclase activity|adenylate cyclase binding|ATP binding|metal ion binding|protein heterodimerization activity|scaffold protein binding|adenosine receptor signaling pathway|adenylate cyclase-activating dopamine receptor signaling pathway|adenylate cyclase-activati…	bom00230,bom01522,bom04015,bom04022,bom04024,bom04062,bom04072,bom04114,bom04211,bom04213,bom04261,bom04270,bom04371,bom04540,bom04611,bom04713,bom04714,bom04723,bom04724,bom04725,bom04726,bom04727,bom04728,bom04750,bom04911,bom04912,bom04913,bom04914,bom04915,bom04916,bom04918,bom04921,bom04923,bom04924,bom04925,bom04926,bom04927,bom04928,bom04934,bom04935,bom04970,bom04971,bom04972,bom04976,bom…	Purine metabolism|Endocrine resistance|Rap1 signaling pathway|cGMP-PKG signaling pathway|cAMP signaling pathway|Chemokine signaling pathway|Phospholipase D signaling pathway|Oocyte meiosis|Longevity regulating pathway|Longevity regulating pathway - multiple species|Adrenergic signaling in cardiomyocytes|Vascular smooth muscle contraction|Apelin signaling pathway|Gap junction|Platelet activation|C…
ADCYAP1R1	1	1	0	0	PREDICTED: pituitary adenylate cyclase-activating polypeptide type I receptor isoform X1 [Bos mutus]	GO:0016021,GO:0043231,GO:0043005,GO:0005886,GO:0043235,GO:0008528,GO:0017046,GO:0004999,GO:0007166	integral component of membrane|intracellular membrane-bounded organelle|neuron projection|plasma membrane|receptor complex|G protein-coupled peptide receptor activity|peptide hormone binding|vasoactive intestinal polypeptide receptor activity|cell surface receptor signaling pathway	bom04024,bom04080,bom04713,bom04911,bom04924	cAMP signaling pathway|Neuroactive ligand-receptor interaction|Circadian entrainment|Insulin secretion|Renin secretion
ADD3	0	1	0	0	PREDICTED: gamma-adducin isoform X1 [Bos mutus]
ADGRA1	0	1	1	0	PREDICTED: adhesion G protein-coupled receptor A1 [Bos mutus]	GO:0098978,GO:0016021,GO:0014069,GO:0004930,GO:0007166	glutamatergic synapse|integral component of membrane|postsynaptic density|G protein-coupled receptor activity|cell surface receptor signaling pathway
ADGRA2	1	1	0	0	PREDICTED: LOW QUALITY PROTEIN: G-protein coupled receptor 124, partial [Bos mutus]	GO:0009986,GO:0030175,GO:0016021,GO:0005886,GO:0004930,GO:0007166,GO:0007417,GO:0043542,GO:0007186,GO:1900747,GO:0010595,GO:0045765,GO:0050920,GO:0090210,GO:0002040	cell surface|filopodium|integral component of membrane|plasma membrane|G protein-coupled receptor activity|cell surface receptor signaling pathway|central nervous system development|endothelial cell migration|G protein-coupled receptor signaling pathway|negative regulation of vascular endothelial growth factor signaling pathway|positive regulation of endothelial cell migration|regulation of angio…
ADGRB2	1	1	0	0	PREDICTED: adhesion G protein-coupled receptor B2 isoform X1 [Bos mutus]	GO:0005813,GO:0016021,GO:0005887,GO:0005886,GO:0004930,GO:0007189,GO:0033173,GO:0007166,GO:0007186,GO:0016525,GO:0007422,GO:0051965	centrosome|integral component of membrane|integral component of plasma membrane|plasma membrane|G protein-coupled receptor activity|adenylate cyclase-activating G protein-coupled receptor signaling pathway|calcineurin-NFAT signaling cascade|cell surface receptor signaling pathway|G protein-coupled receptor signaling pathway|negative regulation of angiogenesis|peripheral nervous system development…
ADGRB3	1	1	0	0	PREDICTED: adhesion G protein-coupled receptor B3 [Bos mutus]	GO:0016021,GO:0005887,GO:0005622,GO:0005886,GO:0098794,GO:0043083,GO:0004930,GO:0005096,GO:0007189,GO:0007166,GO:0007186,GO:0099558,GO:0061743,GO:0007520,GO:0016525,GO:0016322,GO:0051965,GO:0048814	integral component of membrane|integral component of plasma membrane|intracellular|plasma membrane|postsynapse|synaptic cleft|G protein-coupled receptor activity|GTPase activator activity|adenylate cyclase-activating G protein-coupled receptor signaling pathway|cell surface receptor signaling pathway|G protein-coupled receptor signaling pathway|maintenance of synapse structure|motor learning|myob…
ADGRF1	1	0	0	0	adhesion G-protein coupled receptor F1 isoform X1 [Bos taurus]	GO:0005576,GO:0016021,GO:0005622,GO:0005886,GO:0004930,GO:0007189,GO:0007166,GO:0007186,GO:0007613,GO:0031175,GO:0032793,GO:0007416	extracellular region|integral component of membrane|intracellular|plasma membrane|G protein-coupled receptor activity|adenylate cyclase-activating G protein-coupled receptor signaling pathway|cell surface receptor signaling pathway|G protein-coupled receptor signaling pathway|memory|neuron projection development|positive regulation of CREB transcription factor activity|synapse assembly
ADGRF2	0	1	1	1	PREDICTED: adhesion G-protein coupled receptor F2 [Bos mutus]	GO:0016021,GO:0004930,GO:0007166,GO:0007186	integral component of membrane|G protein-coupled receptor activity|cell surface receptor signaling pathway|G protein-coupled receptor signaling pathway
ADGRF4	0	1	0	0	PREDICTED: adhesion G protein-coupled receptor F4 [Bos mutus]	GO:0016021,GO:0004930,GO:0007166,GO:0007186	integral component of membrane|G protein-coupled receptor activity|cell surface receptor signaling pathway|G protein-coupled receptor signaling pathway
ADGRG1	0	1	0	1	PREDICTED: G-protein coupled receptor 56 isoform X1 [Bos mutus]	GO:0005576,GO:0097451,GO:0005887,GO:0005622,GO:0045121,GO:0005518,GO:0050840,GO:0004930,GO:0008201,GO:0007189,GO:0001525,GO:0007420,GO:0007155,GO:0016477,GO:0007166,GO:0021801,GO:0021819,GO:0008285,GO:2001223,GO:0045785,GO:0035025,GO:0070528,GO:0007266,GO:0010573	extracellular region|glial limiting end-foot|integral component of plasma membrane|intracellular|membrane raft|collagen binding|extracellular matrix binding|G protein-coupled receptor activity|heparin binding|adenylate cyclase-activating G protein-coupled receptor signaling pathway|angiogenesis|brain development|cell adhesion|cell migration|cell surface receptor signaling pathway|cerebral cortex …
ADGRG2	1	1	0	0	PREDICTED: LOW QUALITY PROTEIN: adhesion G-protein coupled receptor G2 [Bos mutus]	GO:0016324,GO:0005829,GO:0005887,GO:0004930,GO:0007189,GO:0007166	apical plasma membrane|cytosol|integral component of plasma membrane|G protein-coupled receptor activity|adenylate cyclase-activating G protein-coupled receptor signaling pathway|cell surface receptor signaling pathway
ADGRV1	1	0	0	0	PREDICTED: LOW QUALITY PROTEIN: G-protein coupled receptor 98 [Bos mutus]
ADH5	1	1	0	1	alcohol dehydrogenase class-3 [Bos taurus]	GO:0005739,GO:0004022,GO:0005504,GO:0018467,GO:0042803,GO:0051903,GO:0008270,GO:0006069,GO:0046294,GO:0018119,GO:0045777,GO:0003016,GO:0032496,GO:0051409,GO:0051775,GO:0001523	mitochondrion|alcohol dehydrogenase (NAD) activity|fatty acid binding|formaldehyde dehydrogenase activity|protein homodimerization activity|S-(hydroxymethyl)glutathione dehydrogenase activity|zinc ion binding|ethanol oxidation|formaldehyde catabolic process|peptidyl-cysteine S-nitrosylation|positive regulation of blood pressure|respiratory system process|response to lipopolysaccharide|response to…	bom00010,bom00071,bom00350,bom00620,bom00830,bom00980,bom00982	Glycolysis / Gluconeogenesis|Fatty acid degradation|Tyrosine metabolism|Pyruvate metabolism|Retinol metabolism|Metabolism of xenobiotics by cytochrome P450|Drug metabolism - cytochrome P450
ADIPOQ	0	1	0	0	PREDICTED: adiponectin isoform X2 [Bos indicus]	GO:0005623,GO:0071944,GO:0009986,GO:0005581,GO:0005783,GO:0005615,GO:0048471,GO:0005179,GO:0042802,GO:0042803,GO:0033691,GO:0005102,GO:0050873,GO:0035690,GO:0032869,GO:0070994,GO:0006635,GO:0019395,GO:0042593,GO:0006006,GO:0034383,GO:0045776,GO:0030336,GO:0120163,GO:2000279,GO:0070373,GO:0045599,GO:0045721,GO:0030853,GO:0034115,GO:0043124,GO:0050728,GO:0090317,GO:0045715,GO:0010745,GO:0045650,GO:…	cell|cell periphery|cell surface|collagen trimer|endoplasmic reticulum|extracellular space|perinuclear region of cytoplasm|hormone activity|identical protein binding|protein homodimerization activity|sialic acid binding|signaling receptor binding|brown fat cell differentiation|cellular response to drug|cellular response to insulin stimulus|detection of oxidative stress|fatty acid beta-oxidation|f…	bom03320,bom04152,bom04211,bom04920,bom04930,bom04932	PPAR signaling pathway|AMPK signaling pathway|Longevity regulating pathway|Adipocytokine signaling pathway|Type II diabetes mellitus|Non-alcoholic fatty liver disease
ADORA3	0	1	1	1	PREDICTED: adenosine receptor A3 [Myotis brandtii]	GO:0016021,GO:0005886,GO:0001609,GO:0030336,GO:0008285,GO:0032088	integral component of membrane|plasma membrane|G protein-coupled adenosine receptor activity|negative regulation of cell migration|negative regulation of cell proliferation|negative regulation of NF-kappaB transcription factor activity	bom04022,bom04071,bom04080	cGMP-PKG signaling pathway|Sphingolipid signaling pathway|Neuroactive ligand-receptor interaction
AFAP1	0	1	0	0	PREDICTED: actin filament-associated protein 1 isoform X1 [Bos mutus]	GO:0015629,GO:0005829,GO:0005925,GO:0003779,GO:0051493,GO:0009966	actin cytoskeleton|cytosol|focal adhesion|actin binding|regulation of cytoskeleton organization|regulation of signal transduction
AGL	1	0	0	1	PREDICTED: glycogen debranching enzyme [Bos mutus]	GO:0005737,GO:0004134,GO:0004135,GO:0102500,GO:0005978,GO:0005980	cytoplasm|4-alpha-glucanotransferase activity|amylo-alpha-1,6-glucosidase activity|beta-maltose 4-alpha-glucanotransferase activity|glycogen biosynthetic process|glycogen catabolic process	bom00500	Starch and sucrose metabolism
AGMAT	0	1	0	0	PREDICTED: agmatinase, mitochondrial [Bos mutus]	GO:0005739,GO:0008783,GO:0046872,GO:0097055,GO:0033388,GO:0008295	mitochondrion|agmatinase activity|metal ion binding|agmatine biosynthetic process|putrescine biosynthetic process from arginine|spermidine biosynthetic process	bom00330	Arginine and proline metabolism
AGTR2	0	1	0	0	PREDICTED: type-2 angiotensin II receptor [Bos mutus]	GO:0005576,GO:0005887,GO:0048471,GO:0005886,GO:0004945,GO:0017046,GO:0048019,GO:0008134,GO:0035932,GO:0002033,GO:0001974,GO:0007420,GO:0002035,GO:0061049,GO:0007166,GO:0071549,GO:0006883,GO:0021695,GO:0042416,GO:0035640,GO:0007186,GO:0007199,GO:0006954,GO:0035556,GO:0043537,GO:0030308,GO:0048147,GO:0010459,GO:0032304,GO:0051387,GO:0010700,GO:0007263,GO:0090190,GO:0008284,GO:0050715,GO:2001238,GO:…	extracellular region|integral component of plasma membrane|perinuclear region of cytoplasm|plasma membrane|angiotensin type II receptor activity|peptide hormone binding|receptor antagonist activity|transcription factor binding|aldosterone secretion|angiotensin-mediated vasodilation involved in regulation of systemic arterial blood pressure|blood vessel remodeling|brain development|brain renin-ang…	bom04080,bom04261,bom04614	Neuroactive ligand-receptor interaction|Adrenergic signaling in cardiomyocytes|Renin-angiotensin system
AHCYL2	1	1	1	1	PREDICTED: adenosylhomocysteinase 3 isoform X2 [Bos mutus]	GO:0005783,GO:0004013,GO:0006730	endoplasmic reticulum|adenosylhomocysteinase activity|one-carbon metabolic process	bom00270	Cysteine and methionine metabolism
AHI1	0	1	0	0	PREDICTED: jouberin [Bos mutus]	GO:0005912,GO:0005911,GO:0005814,GO:0005813,GO:0036064,GO:0005929,GO:0005829,GO:0036038,GO:0097730,GO:0042802,GO:0034613,GO:0007417,GO:0097711,GO:0060271,GO:0035844,GO:0001947,GO:0030902,GO:0070121,GO:0070986,GO:0001738,GO:0043066,GO:0071599,GO:0035845,GO:0030862,GO:0002092,GO:0045944,GO:0039023,GO:0039008,GO:0050795,GO:0010842,GO:0065001,GO:0007169,GO:0016192	adherens junction|cell-cell junction|centriole|centrosome|ciliary basal body|cilium|cytosol|MKS complex|non-motile cilium|identical protein binding|cellular protein localization|central nervous system development|ciliary basal body-plasma membrane docking|cilium assembly|cloaca development|heart looping|hindbrain development|Kupffer's vesicle development|left/right axis specification|morphogenesi…
AIF1	0	1	1	1	PREDICTED: allograft inflammatory factor 1 isoform X1 [Bos mutus]	GO:0005884,GO:0042995,GO:0005737,GO:0005829,GO:0030027,GO:0005634,GO:0048471,GO:0001891,GO:0032587,GO:0051015,GO:0005509,GO:0051017,GO:0030041,GO:0071346,GO:0006954,GO:0071672,GO:0048662,GO:0006911,GO:1900087,GO:0090026,GO:0071673,GO:0048661,GO:2000406,GO:0042102,GO:0016601,GO:0097178	actin filament|cell projection|cytoplasm|cytosol|lamellipodium|nucleus|perinuclear region of cytoplasm|phagocytic cup|ruffle membrane|actin filament binding|calcium ion binding|actin filament bundle assembly|actin filament polymerization|cellular response to interferon-gamma|inflammatory response|negative regulation of smooth muscle cell chemotaxis|negative regulation of smooth muscle cell prolif…
AIF1L	1	1	0	1	allograft inflammatory factor 1-like [Bos taurus]	GO:0015629,GO:0042995,GO:0005737,GO:0070062,GO:0005925,GO:0032991,GO:0032587,GO:0051015,GO:0005509,GO:0051017,GO:0097178	actin cytoskeleton|cell projection|cytoplasm|extracellular exosome|focal adhesion|protein-containing complex|ruffle membrane|actin filament binding|calcium ion binding|actin filament bundle assembly|ruffle assembly
AIFM1	1	1	0	0	apoptosis-inducing factor 1, mitochondrial isoform X1 [Bos taurus]			bom04210,bom04217	Apoptosis|Necroptosis
AIFM2	1	1	0	1	hypothetical protein [Bos mutus]			bom04115	p53 signaling pathway
AIM1L	1	1	0	1	PREDICTED: absent in melanoma 1-like protein isoform X2 [Bos indicus]	GO:0030246	carbohydrate binding
AK2	0	1	0	0	hypothetical protein DBR06_SOUSAS210058, partial [Sousa chinensis]	GO:0005743,GO:0005758,GO:0005739,GO:0097226,GO:0004017,GO:0005524,GO:0006172,GO:0046033,GO:0046034	mitochondrial inner membrane|mitochondrial intermembrane space|mitochondrion|sperm mitochondrial sheath|adenylate kinase activity|ATP binding|ADP biosynthetic process|AMP metabolic process|ATP metabolic process	bom00230,bom00730	Purine metabolism|Thiamine metabolism
AK3	1	0	0	0	GTP:AMP phosphotransferase AK3, mitochondrial [Bos taurus]	GO:0005759,GO:0005739,GO:0004017,GO:0005524,GO:0005525,GO:0046899,GO:0006172,GO:0046033,GO:0046039,GO:0046041,GO:0046051	mitochondrial matrix|mitochondrion|adenylate kinase activity|ATP binding|GTP binding|nucleoside triphosphate adenylate kinase activity|ADP biosynthetic process|AMP metabolic process|GTP metabolic process|ITP metabolic process|UTP metabolic process	bom00230	Purine metabolism
AKR1A1	1	1	1	1	hypothetical protein EI555_014509, partial [Monodon monoceros]	GO:0016324,GO:0005829,GO:0045202,GO:0008106,GO:0004032,GO:0047939,GO:0016491,GO:0046185,GO:0042840,GO:0019853	apical plasma membrane|cytosol|synapse|alcohol dehydrogenase (NADP+) activity|alditol:NADP+ 1-oxidoreductase activity|L-glucuronate reductase activity|oxidoreductase activity|aldehyde catabolic process|D-glucuronate catabolic process|L-ascorbic acid biosynthetic process	bom00010,bom00040,bom00053,bom00561,bom00620	Glycolysis / Gluconeogenesis|Pentose and glucuronate interconversions|Ascorbate and aldarate metabolism|Glycerolipid metabolism|Pyruvate metabolism
ALAS2	0	1	0	0	PREDICTED: 5-aminolevulinate synthase, erythroid-specific, mitochondrial [Bos indicus]	GO:0005743,GO:0005759,GO:0003870,GO:0030170,GO:0006879,GO:0030218,GO:0042541,GO:0006782,GO:0001666	mitochondrial inner membrane|mitochondrial matrix|5-aminolevulinate synthase activity|pyridoxal phosphate binding|cellular iron ion homeostasis|erythrocyte differentiation|hemoglobin biosynthetic process|protoporphyrinogen IX biosynthetic process|response to hypoxia	bom00260,bom00860	Glycine, serine and threonine metabolism|Porphyrin and chlorophyll metabolism
ALCAM	1	1	0	0	PREDICTED: CD166 antigen [Bos mutus]	GO:0030424,GO:0030425,GO:0001772,GO:0005887,GO:0031226,GO:0002250,GO:0048846,GO:0007155,GO:0007157,GO:1990138,GO:0031290	axon|dendrite|immunological synapse|integral component of plasma membrane|intrinsic component of plasma membrane|adaptive immune response|axon extension involved in axon guidance|cell adhesion|heterophilic cell-cell adhesion via plasma membrane cell adhesion molecules|neuron projection extension|retinal ganglion cell axon guidance	bom04514	Cell adhesion molecules
ALDH1A1	1	1	1	1	PREDICTED: LOW QUALITY PROTEIN: retinal dehydrogenase 1 [Bos mutus]	GO:0005829,GO:0004029,GO:0018479,GO:0051287,GO:0001758,GO:0055114,GO:0001523,GO:0042572	cytosol|aldehyde dehydrogenase (NAD) activity|benzaldehyde dehydrogenase (NAD+) activity|NAD binding|retinal dehydrogenase activity|oxidation-reduction process|retinoid metabolic process|retinol metabolic process	bom00830	Retinol metabolism
ALDH1A2	1	1	0	1	retinal dehydrogenase 2 [Bos taurus]			bom00830	Retinol metabolism
ALDH1A3	0	1	0	0	PREDICTED: aldehyde dehydrogenase family 1 member A3 [Bos mutus]	GO:0005737,GO:0005829,GO:0005634,GO:0005886,GO:0004028,GO:0004029,GO:0004030,GO:0070403,GO:0042803,GO:0001758,GO:0070324,GO:0031076,GO:0048048,GO:0060324,GO:0070384,GO:0042472,GO:0007626,GO:0050885,GO:0043584,GO:0021768,GO:0060166,GO:0002072,GO:0043065,GO:0048386,GO:0051289,GO:0042574,GO:0002138,GO:0042573,GO:0042572,GO:0060013	cytoplasm|cytosol|nucleus|plasma membrane|3-chloroallyl aldehyde dehydrogenase activity|aldehyde dehydrogenase (NAD) activity|aldehyde dehydrogenase [NAD(P)+] activity|NAD+ binding|protein homodimerization activity|retinal dehydrogenase activity|thyroid hormone binding|embryonic camera-type eye development|embryonic eye morphogenesis|face development|Harderian gland development|inner ear morphoge…	bom00830	Retinol metabolism
ALDH4A1	1	1	0	0	PREDICTED: delta-1-pyrroline-5-carboxylate dehydrogenase, mitochondrial [Bos mutus]	GO:0005759,GO:0003842,GO:0004029,GO:0042802,GO:0010133	mitochondrial matrix|1-pyrroline-5-carboxylate dehydrogenase activity|aldehyde dehydrogenase (NAD) activity|identical protein binding|proline catabolic process to glutamate	bom00250,bom00330	Alanine, aspartate and glutamate metabolism|Arginine and proline metabolism
ALDH5A1	1	1	1	1	PREDICTED: succinate-semialdehyde dehydrogenase, mitochondrial [Bos mutus]	GO:0005739,GO:0004777,GO:0009013,GO:0007417,GO:0009450,GO:0055114,GO:0051289	mitochondrion|succinate-semialdehyde dehydrogenase (NAD+) activity|succinate-semialdehyde dehydrogenase [NAD(P)+] activity|central nervous system development|gamma-aminobutyric acid catabolic process|oxidation-reduction process|protein homotetramerization	bom00250,bom00650	Alanine, aspartate and glutamate metabolism|Butanoate metabolism
ALDH6A1	1	1	0	1	hypothetical protein [Bos mutus]	GO:0005739,GO:0000062,GO:0018478,GO:0004491,GO:0006210,GO:0019859,GO:0006574,GO:0006573	mitochondrion|fatty-acyl-CoA binding|malonate-semialdehyde dehydrogenase (acetylating) activity|methylmalonate-semialdehyde dehydrogenase (acylating) activity|thymine catabolic process|thymine metabolic process|valine catabolic process|valine metabolic process	bom00280,bom00410,bom00562,bom00640	Valine, leucine and isoleucine degradation|beta-Alanine metabolism|Inositol phosphate metabolism|Propanoate metabolism
ALG14	1	1	0	1	UDP-N-acetylglucosamine transferase subunit ALG14 homolog isoform X1 [Bos taurus]	GO:0005789,GO:0016021,GO:0031965,GO:0004577,GO:0006488	endoplasmic reticulum membrane|integral component of membrane|nuclear membrane|N-acetylglucosaminyldiphosphodolichol N-acetylglucosaminyltransferase activity|dolichol-linked oligosaccharide biosynthetic process	bom00510,bom00513	N-Glycan biosynthesis|Various types of N-glycan biosynthesis
ALK	0	1	0	0	PREDICTED: ALK tyrosine kinase receptor [Bos mutus]			bom05200,bom05223,bom05235	Pathways in cancer|Non-small cell lung cancer|PD-L1 expression and PD-1 checkpoint pathway in cancer
ALPL	1	1	1	1	PREDICTED: alkaline phosphatase, tissue-nonspecific isozyme [Bos indicus]	GO:0031225,GO:0031012,GO:0065010,GO:0005886,GO:0004035,GO:0046872,GO:0016462,GO:0031214,GO:0071407,GO:0003006,GO:0001958,GO:0046677,GO:0033280	anchored component of membrane|extracellular matrix|extracellular membrane-bounded organelle|plasma membrane|alkaline phosphatase activity|metal ion binding|pyrophosphatase activity|biomineral tissue development|cellular response to organic cyclic compound|developmental process involved in reproduction|endochondral ossification|response to antibiotic|response to vitamin D	bom00730,bom00790	Thiamine metabolism|Folate biosynthesis
ALYREF	0	0	0	1	PREDICTED: THO complex subunit 4 [Bos mutus]	GO:0005737,GO:0016607,GO:0005634,GO:0005681,GO:0003723,GO:0003697,GO:0006397,GO:0051028,GO:0008380	cytoplasm|nuclear speck|nucleus|spliceosomal complex|RNA binding|single-stranded DNA binding|mRNA processing|mRNA transport|RNA splicing	bom03013,bom03015,bom03040,bom05014,bom05168	RNA transport|mRNA surveillance pathway|Spliceosome|Amyotrophic lateral sclerosis|Herpes simplex virus 1 infection
AMACR	1	1	1	1	PREDICTED: LOW QUALITY PROTEIN: alpha-methylacyl-CoA racemase [Bos mutus]	GO:0005737,GO:0005829,GO:0043231,GO:0005739,GO:0005782,GO:0005777,GO:0005886,GO:0008111,GO:0005102,GO:0006699,GO:0008206,GO:0033540,GO:0006625	cytoplasm|cytosol|intracellular membrane-bounded organelle|mitochondrion|peroxisomal matrix|peroxisome|plasma membrane|alpha-methylacyl-CoA racemase activity|signaling receptor binding|bile acid biosynthetic process|bile acid metabolic process|fatty acid beta-oxidation using acyl-CoA oxidase|protein targeting to peroxisome	bom00120,bom04146	Primary bile acid biosynthesis|Peroxisome
AMICA1	0	1	0	1	PREDICTED: junctional adhesion molecule-like [Bos mutus]	GO:0005923,GO:0016021,GO:0005886,GO:0050839,GO:0005178,GO:0042803,GO:0046629,GO:0007157,GO:0050900,GO:0035696,GO:0030593,GO:0072672,GO:0060054,GO:0050776	bicellular tight junction|integral component of membrane|plasma membrane|cell adhesion molecule binding|integrin binding|protein homodimerization activity|gamma-delta T cell activation|heterophilic cell-cell adhesion via plasma membrane cell adhesion molecules|leukocyte migration|monocyte extravasation|neutrophil chemotaxis|neutrophil extravasation|positive regulation of epithelial cell prolifera…
AMIGO1	0	1	0	0	AMIGO1 [Cervus elaphus hippelaphus]	GO:0030424,GO:0030425,GO:0016021,GO:0032809,GO:0043204,GO:0008076,GO:0015459,GO:0007413,GO:0007409,GO:0007157,GO:0007156,GO:0042552,GO:0050772,GO:1901381,GO:0051965	axon|dendrite|integral component of membrane|neuronal cell body membrane|perikaryon|voltage-gated potassium channel complex|potassium channel regulator activity|axonal fasciculation|axonogenesis|heterophilic cell-cell adhesion via plasma membrane cell adhesion molecules|homophilic cell adhesion via plasma membrane adhesion molecules|myelination|positive regulation of axonogenesis|positive regulat…
AMN1	0	1	0	0	protein AMN1 homolog [Bos taurus]	GO:0019005,GO:0016567,GO:0031146,GO:0006511	SCF ubiquitin ligase complex|protein ubiquitination|SCF-dependent proteasomal ubiquitin-dependent protein catabolic process|ubiquitin-dependent protein catabolic process
AMPD2	1	0	0	1	AMP deaminase 2 isoform X2 [Camelus ferus]	GO:0005829,GO:0003876,GO:0046872,GO:0052652,GO:0097009,GO:0006188,GO:0032264,GO:0043101	cytosol|AMP deaminase activity|metal ion binding|cyclic purine nucleotide metabolic process|energy homeostasis|IMP biosynthetic process|IMP salvage|purine-containing compound salvage	bom00230	Purine metabolism
AMT	0	1	0	0	PREDICTED: aminomethyltransferase, mitochondrial isoform X1 [Bos mutus]	GO:0005743,GO:0005739,GO:0005654,GO:0004047,GO:0031405,GO:0008483,GO:0006546,GO:0019464	mitochondrial inner membrane|mitochondrion|nucleoplasm|aminomethyltransferase activity|lipoic acid binding|transaminase activity|glycine catabolic process|glycine decarboxylation via glycine cleavage system	bom00260,bom00630,bom00670	Glycine, serine and threonine metabolism|Glyoxylate and dicarboxylate metabolism|One carbon pool by folate
ANGPT4	1	1	0	0	PREDICTED: angiopoietin-4 [Bos mutus]	GO:0005576,GO:0030971,GO:0001525	extracellular region|receptor tyrosine kinase binding|angiogenesis	bom04010,bom04014,bom04015,bom04066,bom04151	MAPK signaling pathway|Ras signaling pathway|Rap1 signaling pathway|HIF-1 signaling pathway|PI3K-Akt signaling pathway
ANGPTL2	1	1	0	0	angiopoietin-related protein 2 precursor [Bos taurus]	GO:0062023,GO:0070062,GO:0005615,GO:0005102,GO:0007275	collagen-containing extracellular matrix|extracellular exosome|extracellular space|signaling receptor binding|multicellular organism development
ANKRD13A	1	1	1	0	ankyrin repeat domain-containing protein 13A [Bos taurus]	GO:0005770,GO:0005886	late endosome|plasma membrane
ANKRD22	0	1	0	0	PREDICTED: ankyrin repeat domain-containing protein 22 [Bos mutus]
ANKRD24	1	1	0	0	PREDICTED: ankyrin repeat domain-containing protein 24 [Bos mutus]
ANKRD35	0	0	1	0	PREDICTED: ankyrin repeat domain-containing protein 35 [Bos mutus]
ANKRD37	1	1	1	1	ankyrin repeat domain-containing protein 37 [Bos taurus]	GO:0005829,GO:0005739,GO:0005634	cytosol|mitochondrion|nucleus
ANKRD44	1	1	0	1	PREDICTED: serine/threonine-protein phosphatase 6 regulatory ankyrin repeat subunit B [Bos mutus]
ANKRD45	1	0	0	0	PREDICTED: ankyrin repeat domain-containing protein 45 [Bos mutus]
ANKRD6	1	1	0	0	Ankyrin repeat domain-containing protein 6 [Bos mutus]	GO:0005737,GO:0043231,GO:0005634,GO:0090090,GO:2000096	cytoplasm|intracellular membrane-bounded organelle|nucleus|negative regulation of canonical Wnt signaling pathway|positive regulation of Wnt signaling pathway, planar cell polarity pathway
ANLN	1	1	1	1	PREDICTED: actin-binding protein anillin isoform X1 [Bos mutus]
ANO1	1	1	0	1	PREDICTED: anoctamin-1 [Bos mutus]	GO:0016324,GO:0034707,GO:0005737,GO:0070062,GO:0005886,GO:0005227,GO:0005254,GO:0005229,GO:0015111,GO:0046983,GO:0005247,GO:0006812,GO:0034605,GO:1902476,GO:0006821,GO:0050965,GO:0015705,GO:0034220,GO:0007275,GO:0007200,GO:0035774	apical plasma membrane|chloride channel complex|cytoplasm|extracellular exosome|plasma membrane|calcium activated cation channel activity|chloride channel activity|intracellular calcium activated chloride channel activity|iodide transmembrane transporter activity|protein dimerization activity|voltage-gated chloride channel activity|cation transport|cellular response to heat|chloride transmembrane…
ANXA3	1	1	0	1	PREDICTED: annexin A3 [Bos mutus]	GO:0005509,GO:0005544,GO:0048306,GO:0019834,GO:0006909,GO:0051384	calcium ion binding|calcium-dependent phospholipid binding|calcium-dependent protein binding|phospholipase A2 inhibitor activity|phagocytosis|response to glucocorticoid
ANXA6	0	1	0	0	PREDICTED: annexin A6 [Bos mutus]	GO:0042584,GO:0005737,GO:0005829,GO:0005925,GO:0016021,GO:0031902,GO:0005765,GO:0042470,GO:0016020,GO:0030061,GO:0048471,GO:0005886,GO:0001725,GO:0031982,GO:0051015,GO:0005262,GO:0005509,GO:0005544,GO:0048306,GO:0015485,GO:0035374,GO:0019899,GO:0005525,GO:0008201,GO:0042802,GO:0015276,GO:0001786,GO:0042803,GO:0044877,GO:0038023,GO:0097190,GO:0031214,GO:0070509,GO:0070588,GO:0006816,GO:0003418,GO:…	chromaffin granule membrane|cytoplasm|cytosol|focal adhesion|integral component of membrane|late endosome membrane|lysosomal membrane|melanosome|membrane|mitochondrial crista|perinuclear region of cytoplasm|plasma membrane|stress fiber|vesicle|actin filament binding|calcium channel activity|calcium ion binding|calcium-dependent phospholipid binding|calcium-dependent protein binding|cholesterol bi…
ANXA7	0	1	0	0	PREDICTED: annexin A7 isoform X1 [Bos mutus]	GO:0042584,GO:0005829,GO:0005789,GO:0005635,GO:0005886,GO:0005509,GO:0005544,GO:0048306,GO:0042802,GO:0005178,GO:0006914,GO:0008283,GO:0006874,GO:0009992,GO:0030855,GO:0007599,GO:0010629,GO:0008360,GO:0009651,GO:0035176	chromaffin granule membrane|cytosol|endoplasmic reticulum membrane|nuclear envelope|plasma membrane|calcium ion binding|calcium-dependent phospholipid binding|calcium-dependent protein binding|identical protein binding|integrin binding|autophagy|cell proliferation|cellular calcium ion homeostasis|cellular water homeostasis|epithelial cell differentiation|hemostasis|negative regulation of gene exp…	bom05014	Amyotrophic lateral sclerosis
ANXA9	1	1	0	1	annexin A9 isoform X1 [Odocoileus virginianus texanus]	GO:0015464,GO:0005509,GO:0005544,GO:0001786	acetylcholine receptor activity|calcium ion binding|calcium-dependent phospholipid binding|phosphatidylserine binding
AOAH	0	1	0	1	PREDICTED: acyloxyacyl hydrolase [Bos mutus]	GO:0031410,GO:0005576,GO:0050528,GO:0005509,GO:0006631,GO:0009104	cytoplasmic vesicle|extracellular region|acyloxyacyl hydrolase activity|calcium ion binding|fatty acid metabolic process|lipopolysaccharide catabolic process
AP4B1	0	1	0	0	PREDICTED: AP-4 complex subunit beta-1 isoform X1 [Bos mutus]	GO:0030124,GO:0030131,GO:0005829,GO:0031904,GO:0019898,GO:0005802,GO:0032588,GO:0030276,GO:0008104,GO:0006605,GO:0016192	AP-4 adaptor complex|clathrin adaptor complex|cytosol|endosome lumen|extrinsic component of membrane|trans-Golgi network|trans-Golgi network membrane|clathrin binding|protein localization|protein targeting|vesicle-mediated transport	bom04142	Lysosome
AP4S1	0	0	0	1	PREDICTED: AP-4 complex subunit sigma-1 isoform X2 [Oryctolagus cuniculus]	GO:0030124,GO:0005794,GO:0015031	AP-4 adaptor complex|Golgi apparatus|protein transport	bom04142	Lysosome
APBB1IP	0	1	0	0	PREDICTED: amyloid beta A4 precursor protein-binding family B member 1-interacting protein [Bos mutus]	GO:0005856,GO:0005829,GO:0005925,GO:0030027,GO:0005886,GO:0042101,GO:0045785,GO:0007165,GO:0002291	cytoskeleton|cytosol|focal adhesion|lamellipodium|plasma membrane|T cell receptor complex|positive regulation of cell adhesion|signal transduction|T cell activation via T cell receptor contact with antigen bound to MHC molecule on antigen presenting cell	bom04015,bom04611	Rap1 signaling pathway|Platelet activation
APBB2	1	1	0	1	PREDICTED: amyloid beta A4 precursor protein-binding family B member 2 isoform X2 [Bos mutus]	GO:0005737,GO:0030426,GO:0030027,GO:0016020,GO:0005634,GO:0045202,GO:0001540,GO:0008134,GO:0007411,GO:0007050,GO:0030198,GO:0035556,GO:0043066,GO:0030308,GO:0001764,GO:0043065,GO:0006355	cytoplasm|growth cone|lamellipodium|membrane|nucleus|synapse|amyloid-beta binding|transcription factor binding|axon guidance|cell cycle arrest|extracellular matrix organization|intracellular signal transduction|negative regulation of apoptotic process|negative regulation of cell growth|neuron migration|positive regulation of apoptotic process|regulation of transcription, DNA-templated
APCDD1L	1	1	0	0	PREDICTED: protein APCDD1-like [Bos mutus]	GO:0016021	integral component of membrane
APLP1	0	1	0	0	PREDICTED: amyloid-like protein 1 [Bos mutus]	GO:0005604,GO:0016021,GO:0048471,GO:0005886,GO:0031694,GO:0031695,GO:0031696,GO:0008201,GO:0042802,GO:0046914,GO:0009887,GO:0006915,GO:0007155,GO:0071874,GO:0006897,GO:0106072,GO:0007399	basement membrane|integral component of membrane|perinuclear region of cytoplasm|plasma membrane|alpha-2A adrenergic receptor binding|alpha-2B adrenergic receptor binding|alpha-2C adrenergic receptor binding|heparin binding|identical protein binding|transition metal ion binding|animal organ morphogenesis|apoptotic process|cell adhesion|cellular response to norepinephrine stimulus|endocytosis|nega…
APOBEC1	0	1	0	0	PREDICTED: C->U-editing enzyme APOBEC-1 [Bos mutus]	GO:0005737,GO:0005654,GO:0005634,GO:0017091,GO:0004126,GO:0004131,GO:0008047,GO:0003729,GO:0019904,GO:0043021,GO:0003723,GO:0008270,GO:0032869,GO:0016554,GO:0051607,GO:0070383,GO:0080111,GO:0006629,GO:0042158,GO:0042953,GO:0016556,GO:0006397,GO:0048255,GO:0090310,GO:0090209,GO:0090366,GO:0042127,GO:0051592,GO:0045471,GO:0010332,GO:0006970,GO:0010043,GO:0006396,GO:0006641	cytoplasm|nucleoplasm|nucleus|AU-rich element binding|cytidine deaminase activity|cytosine deaminase activity|enzyme activator activity|mRNA binding|protein domain specific binding|ribonucleoprotein complex binding|RNA binding|zinc ion binding|cellular response to insulin stimulus|cytidine to uridine editing|defense response to virus|DNA cytosine deamination|DNA demethylation|lipid metabolic proc…
APOD	0	0	0	1	PREDICTED: apolipoprotein D [Bos mutus]	GO:0022626,GO:0030425,GO:0005783,GO:0005615,GO:0043025,GO:0048471,GO:0015485,GO:0007568,GO:0007420,GO:0006006,GO:0006629,GO:0006869,GO:1900016,GO:0051895,GO:0060588,GO:0071638,GO:0010642,GO:0042308,GO:0048662,GO:2000098,GO:2000405,GO:0014012,GO:0048678,GO:0042493,GO:0000302,GO:0042246	cytosolic ribosome|dendrite|endoplasmic reticulum|extracellular space|neuronal cell body|perinuclear region of cytoplasm|cholesterol binding|aging|brain development|glucose metabolic process|lipid metabolic process|lipid transport|negative regulation of cytokine production involved in inflammatory response|negative regulation of focal adhesion assembly|negative regulation of lipoprotein lipid oxi…
APOE	1	0	0	0	PREDICTED: apolipoprotein E isoform X2 [Bos mutus]	GO:0042627,GO:0034364,GO:0034361,GO:0008201,GO:0008289,GO:0006869,GO:0042157	chylomicron|high-density lipoprotein particle|very-low-density lipoprotein particle|heparin binding|lipid binding|lipid transport|lipoprotein metabolic process	bom04979,bom05010	Cholesterol metabolism|Alzheimer disease
APOH	1	0	0	0	PREDICTED: beta-2-glycoprotein 1 [Bos mutus]	GO:0005576,GO:0008201	extracellular region|heparin binding	bom04979	Cholesterol metabolism
APP	0	1	0	0	PREDICTED: amyloid beta A4 protein, partial [Bos mutus]	GO:0045177,GO:0030424,GO:0009986,GO:0005911,GO:0035253,GO:0005905,GO:0030134,GO:0005737,GO:0043198,GO:0043197,GO:0005769,GO:0005615,GO:0005794,GO:0030426,GO:0016021,GO:0045121,GO:0031594,GO:0005641,GO:0043204,GO:0048471,GO:0005886,GO:0048786,GO:0043235,GO:0005790,GO:0051233,GO:0003677,GO:0019899,GO:0008201,GO:0042802,GO:0051425,GO:0004867,GO:0005102,GO:0046914,GO:0008344,GO:1990000,GO:0002265,GO:…	apical part of cell|axon|cell surface|cell-cell junction|ciliary rootlet|clathrin-coated pit|COPII-coated ER to Golgi transport vesicle|cytoplasm|dendritic shaft|dendritic spine|early endosome|extracellular space|Golgi apparatus|growth cone|integral component of membrane|membrane raft|neuromuscular junction|nuclear envelope lumen|perikaryon|perinuclear region of cytoplasm|plasma membrane|presynap…	bom04726,bom05010,bom05022	Serotonergic synapse|Alzheimer disease|Pathways of neurodegeneration - multiple diseases
AQP2	0	1	0	0	aquaporin-2 [Ovis aries]	GO:0016324,GO:0016323,GO:0030659,GO:0070062,GO:0005794,GO:0016021,GO:0055037,GO:0015168,GO:0015250,GO:0071280,GO:0071288,GO:0042631,GO:0072205,GO:0003097	apical plasma membrane|basolateral plasma membrane|cytoplasmic vesicle membrane|extracellular exosome|Golgi apparatus|integral component of membrane|recycling endosome|glycerol transmembrane transporter activity|water channel activity|cellular response to copper ion|cellular response to mercury ion|cellular response to water deprivation|metanephric collecting duct development|renal water transport	bom04962	Vasopressin-regulated water reabsorption
AQP3	1	1	0	0	PREDICTED: aquaporin-3 [Bos mutus]	GO:0016323,GO:0005911,GO:0005737,GO:0016021,GO:0005634,GO:0015254,GO:0071456,GO:0090650,GO:0042476,GO:0002684,GO:0070295,GO:0032526,GO:0015840	basolateral plasma membrane|cell-cell junction|cytoplasm|integral component of membrane|nucleus|glycerol channel activity|cellular response to hypoxia|cellular response to oxygen-glucose deprivation|odontogenesis|positive regulation of immune system process|renal water absorption|response to retinoic acid|urea transport	bom04962	Vasopressin-regulated water reabsorption
AQP5	1	1	0	1	Aquaporin-5, partial [Bos mutus]	GO:0016324,GO:0016021,GO:0015267	apical plasma membrane|integral component of membrane|channel activity	bom04970	Salivary secretion
AQP6	1	1	0	1	PREDICTED: aquaporin-6 [Bos mutus]	GO:0016324,GO:0016021,GO:0030658,GO:0005253,GO:0015112,GO:0015706,GO:0042476	apical plasma membrane|integral component of membrane|transport vesicle membrane|anion channel activity|nitrate transmembrane transporter activity|nitrate transport|odontogenesis
AR	1	1	0	1	PREDICTED: androgen receptor [Bos mutus]	GO:0005737,GO:0000790,GO:0005634,GO:0005497,GO:0004882,GO:0008013,GO:0003700,GO:0004879,GO:0043565,GO:0005496,GO:0044212,GO:0008270,GO:0030521,GO:0030522,GO:2001237,GO:0045720,GO:0008284,GO:0051092,GO:0042327,GO:0045944,GO:0045893,GO:1903076,GO:0006351	cytoplasm|nuclear chromatin|nucleus|androgen binding|androgen receptor activity|beta-catenin binding|DNA-binding transcription factor activity|nuclear receptor activity|sequence-specific DNA binding|steroid binding|transcription regulatory region DNA binding|zinc ion binding|androgen receptor signaling pathway|intracellular receptor signaling pathway|negative regulation of extrinsic apoptotic sig…	bom04114,bom05200,bom05207,bom05215	Oocyte meiosis|Pathways in cancer|Chemical carcinogenesis - receptor activation|Prostate cancer
ARFGEF2	0	1	0	0	PREDICTED: brefeldin A-inhibited guanine nucleotide-exchange protein 2 [Bos mutus]	GO:0032279,GO:0005879,GO:0030054,GO:0031410,GO:0005829,GO:0043197,GO:0000139,GO:0016020,GO:0005815,GO:0048471,GO:0055037,GO:0032280,GO:0005802,GO:0005086,GO:0050811,GO:0005085,GO:0017022,GO:0034237,GO:0010256,GO:0007032,GO:0006887,GO:0006893,GO:0035556,GO:0032760,GO:0015031,GO:0001881,GO:0032012,GO:0016192	asymmetric synapse|axonemal microtubule|cell junction|cytoplasmic vesicle|cytosol|dendritic spine|Golgi membrane|membrane|microtubule organizing center|perinuclear region of cytoplasm|recycling endosome|symmetric synapse|trans-Golgi network|ARF guanyl-nucleotide exchange factor activity|GABA receptor binding|guanyl-nucleotide exchange factor activity|myosin binding|protein kinase A regulatory sub…	bom04144	Endocytosis
ARFGEF3	0	0	1	1	PREDICTED: brefeldin A-inhibited guanine nucleotide-exchange protein 3 [Bos mutus]	GO:0016021,GO:0030658,GO:0005086,GO:0010923,GO:0032012	integral component of membrane|transport vesicle membrane|ARF guanyl-nucleotide exchange factor activity|negative regulation of phosphatase activity|regulation of ARF protein signal transduction
ARG1	1	1	0	0	PREDICTED: arginase-1 [Bos mutus]	GO:0005737,GO:0005829,GO:0005615,GO:0004053,GO:0030145,GO:0019547,GO:0042832,GO:0046007,GO:0060336,GO:2000552,GO:0070965,GO:0000050	cytoplasm|cytosol|extracellular space|arginase activity|manganese ion binding|arginine catabolic process to ornithine|defense response to protozoan|negative regulation of activated T cell proliferation|negative regulation of interferon-gamma-mediated signaling pathway|negative regulation of T-helper 2 cell cytokine production|positive regulation of neutrophil mediated killing of fungus|urea cycle	bom00220,bom00330,bom05146	Arginine biosynthesis|Arginine and proline metabolism|Amoebiasis
ARHGAP11A	1	1	1	1	PREDICTED: rho GTPase-activating protein 11A [Bos mutus]	GO:0005829,GO:0005096,GO:0051056,GO:0007165	cytosol|GTPase activator activity|regulation of small GTPase mediated signal transduction|signal transduction
ARHGAP18	0	1	0	1	PREDICTED: rho GTPase-activating protein 18 [Bos mutus]	GO:0005737,GO:0005829,GO:0016607,GO:0005886,GO:0045296,GO:0005096,GO:0032956,GO:0030833,GO:2000145,GO:0008360,GO:0051056,GO:0007264	cytoplasm|cytosol|nuclear speck|plasma membrane|cadherin binding|GTPase activator activity|regulation of actin cytoskeleton organization|regulation of actin filament polymerization|regulation of cell motility|regulation of cell shape|regulation of small GTPase mediated signal transduction|small GTPase mediated signal transduction
ARHGAP26	1	1	0	0	PREDICTED: rho GTPase-activating protein 26 isoform X1 [Bos mutus]
ARHGAP30	0	1	0	0	Rho GTPase-activating protein 30, partial [Bos mutus]	GO:0031410,GO:0005829,GO:0043231,GO:0005096,GO:0051056,GO:0007264	cytoplasmic vesicle|cytosol|intracellular membrane-bounded organelle|GTPase activator activity|regulation of small GTPase mediated signal transduction|small GTPase mediated signal transduction
ARHGAP32	0	1	0	1	PREDICTED: rho GTPase-activating protein 32 [Bos mutus]	GO:0015629,GO:0005938,GO:0030054,GO:0005829,GO:0043197,GO:0005789,GO:0010008,GO:0001650,GO:0005794,GO:0000139,GO:0005654,GO:0014069,GO:0045211,GO:0005096,GO:0035091,GO:0051056,GO:0007264	actin cytoskeleton|cell cortex|cell junction|cytosol|dendritic spine|endoplasmic reticulum membrane|endosome membrane|fibrillar center|Golgi apparatus|Golgi membrane|nucleoplasm|postsynaptic density|postsynaptic membrane|GTPase activator activity|phosphatidylinositol binding|regulation of small GTPase mediated signal transduction|small GTPase mediated signal transduction
ARHGAP36	1	1	0	0	PREDICTED: rho GTPase-activating protein 36 isoform X1 [Bos mutus]	GO:0005096,GO:0007165	GTPase activator activity|signal transduction
ARHGAP4	1	0	0	0	PREDICTED: LOW QUALITY PROTEIN: rho GTPase-activating protein 4 [Bos mutus]	GO:0005737,GO:0005829,GO:0005794,GO:0030426,GO:0005874,GO:0005096,GO:0042802,GO:0048365,GO:0005070,GO:0007010,GO:0030517,GO:0030336,GO:0010764,GO:0051056,GO:0007266	cytoplasm|cytosol|Golgi apparatus|growth cone|microtubule|GTPase activator activity|identical protein binding|Rac GTPase binding|SH3/SH2 adaptor activity|cytoskeleton organization|negative regulation of axon extension|negative regulation of cell migration|negative regulation of fibroblast migration|regulation of small GTPase mediated signal transduction|Rho protein signal transduction
ARHGAP9	0	0	0	1	PREDICTED: rho GTPase-activating protein 9 [Bos mutus]	GO:0005737,GO:0005829,GO:0005576,GO:0034774,GO:0005096,GO:0005547,GO:0043312,GO:0043087,GO:0051056,GO:0007165	cytoplasm|cytosol|extracellular region|secretory granule lumen|GTPase activator activity|phosphatidylinositol-3,4,5-trisphosphate binding|neutrophil degranulation|regulation of GTPase activity|regulation of small GTPase mediated signal transduction|signal transduction
ARHGEF15	1	1	0	0	PREDICTED: rho guanine nucleotide exchange factor 15 [Bos mutus]	GO:0005737,GO:0030425,GO:0005096,GO:0005089,GO:2000297,GO:0051496,GO:0050790,GO:0035023,GO:0061299	cytoplasm|dendrite|GTPase activator activity|Rho guanyl-nucleotide exchange factor activity|negative regulation of synapse maturation|positive regulation of stress fiber assembly|regulation of catalytic activity|regulation of Rho protein signal transduction|retina vasculature morphogenesis in camera-type eye
ARHGEF17	0	1	0	0	PREDICTED: rho guanine nucleotide exchange factor 17 [Bos mutus]
ARHGEF18	0	1	0	1	TPA: Rho guanine nucleotide exchange factor 18-like [Bos taurus]	GO:0045177,GO:0016324,GO:0030054,GO:0005856,GO:0005829,GO:0070062,GO:0005886,GO:0005085,GO:0046872,GO:0005089,GO:0030036,GO:0007186,GO:0043065,GO:0008360,GO:0035023,GO:0051056,GO:0007264,GO:0007179	apical part of cell|apical plasma membrane|cell junction|cytoskeleton|cytosol|extracellular exosome|plasma membrane|guanyl-nucleotide exchange factor activity|metal ion binding|Rho guanyl-nucleotide exchange factor activity|actin cytoskeleton organization|G protein-coupled receptor signaling pathway|positive regulation of apoptotic process|regulation of cell shape|regulation of Rho protein signal…	bom04530	Tight junction
ARHGEF19	1	1	0	1	PREDICTED: rho guanine nucleotide exchange factor 19 [Bos mutus]	GO:0005829,GO:0005096,GO:0005085,GO:0005089,GO:0007186,GO:0043065,GO:0032956,GO:0035023,GO:0051056,GO:0060071,GO:0042060	cytosol|GTPase activator activity|guanyl-nucleotide exchange factor activity|Rho guanyl-nucleotide exchange factor activity|G protein-coupled receptor signaling pathway|positive regulation of apoptotic process|regulation of actin cytoskeleton organization|regulation of Rho protein signal transduction|regulation of small GTPase mediated signal transduction|Wnt signaling pathway, planar cell polari…
ARID5A	1	1	1	1	PREDICTED: AT-rich interactive domain-containing protein 5A [Bos mutus]	GO:0005634,GO:0003723,GO:0044212,GO:0045087,GO:0006357	nucleus|RNA binding|transcription regulatory region DNA binding|innate immune response|regulation of transcription by RNA polymerase II
ARNT2	0	1	0	0	aryl hydrocarbon receptor nuclear translocator 2 [Bos taurus]	GO:0005737,GO:0005654,GO:0005634,GO:0005667,GO:0017162,GO:0003700,GO:0000981,GO:0046982,GO:0001077,GO:0000978,GO:0007420,GO:0007417,GO:0001701,GO:0043066,GO:0008284,GO:0045944,GO:0045893,GO:0006355,GO:0032355,GO:0001666,GO:0006805	cytoplasm|nucleoplasm|nucleus|transcription factor complex|aryl hydrocarbon receptor binding|DNA-binding transcription factor activity|DNA-binding transcription factor activity, RNA polymerase II-specific|protein heterodimerization activity|proximal promoter DNA-binding transcription activator activity, RNA polymerase II-specific|RNA polymerase II proximal promoter sequence-specific DNA binding|b…	bom05200,bom05202,bom05211	Pathways in cancer|Transcriptional misregulation in cancer|Renal cell carcinoma
ARNTL	0	1	0	0	PREDICTED: aryl hydrocarbon receptor nuclear translocator-like protein 1 isoform X1 [Bos mutus]	GO:0033391,GO:0005634,GO:0016605,GO:0005667,GO:0003700,GO:0070888,GO:0046983,GO:0000980,GO:0043565,GO:0000976,GO:0032922,GO:0045599,GO:2000323,GO:0032007,GO:0045892,GO:0090403,GO:0090263,GO:0042753,GO:1901985,GO:2001016,GO:0045893,GO:0043161,GO:0051726,GO:2000772,GO:0042634,GO:0050796,GO:0050767,GO:0006355,GO:2000074,GO:0007283	chromatoid body|nucleus|PML body|transcription factor complex|DNA-binding transcription factor activity|E-box binding|protein dimerization activity|RNA polymerase II distal enhancer sequence-specific DNA binding|sequence-specific DNA binding|transcription regulatory region sequence-specific DNA binding|circadian regulation of gene expression|negative regulation of fat cell differentiation|negativ…	bom04710,bom04728	Circadian rhythm|Dopaminergic synapse
ARRB1	0	1	0	0	PREDICTED: beta-arrestin-1 isoform X1 [Equus asinus]	GO:0000785,GO:0030132,GO:0005737,GO:0031410,GO:0005829,GO:0016604,GO:0005886,GO:0031143,GO:0033130,GO:0031701,GO:0035612,GO:1990763,GO:0030276,GO:0032050,GO:0043027,GO:0005096,GO:0000822,GO:0005159,GO:0031434,GO:0005547,GO:0042803,GO:0008134,GO:0044212,GO:0031625,GO:0072583,GO:0002029,GO:0002031,GO:0032715,GO:0032717,GO:0032088,GO:0045746,GO:0031397,GO:0007602,GO:0070374,GO:0090240,GO:0035774,GO:…	chromatin|clathrin coat of coated pit|cytoplasm|cytoplasmic vesicle|cytosol|nuclear body|plasma membrane|pseudopodium|acetylcholine receptor binding|angiotensin receptor binding|AP-2 adaptor complex binding|arrestin family protein binding|clathrin binding|clathrin heavy chain binding|cysteine-type endopeptidase inhibitor activity involved in apoptotic process|GTPase activator activity|inositol he…	bom04010,bom04062,bom04144,bom04340,bom04728,bom04740,bom04926,bom04928,bom04929,bom05032,bom05207	MAPK signaling pathway|Chemokine signaling pathway|Endocytosis|Hedgehog signaling pathway|Dopaminergic synapse|Olfactory transduction|Relaxin signaling pathway|Parathyroid hormone synthesis, secretion and action|GnRH secretion|Morphine addiction|Chemical carcinogenesis - receptor activation
ARSA	0	0	0	1	PREDICTED: arylsulfatase A isoform X1 [Bos mutus]	GO:0005783,GO:0016021,GO:0005764,GO:0005886,GO:0005509,GO:0004098,GO:0007339	endoplasmic reticulum|integral component of membrane|lysosome|plasma membrane|calcium ion binding|cerebroside-sulfatase activity|binding of sperm to zona pellucida	bom00600,bom04142	Sphingolipid metabolism|Lysosome
ARSK	0	0	0	1	Arylsulfatase K, partial [Bos mutus]	GO:0005576,GO:0046872,GO:0008484	extracellular region|metal ion binding|sulfuric ester hydrolase activity
ART4	1	1	1	1	PREDICTED: ecto-ADP-ribosyltransferase 4 [Bos mutus]	GO:0031225,GO:0005886,GO:0003956,GO:0003950,GO:0018120,GO:0006471	anchored component of membrane|plasma membrane|NAD(P)+-protein-arginine ADP-ribosyltransferase activity|NAD+ ADP-ribosyltransferase activity|peptidyl-arginine ADP-ribosylation|protein ADP-ribosylation
ASAH2	0	1	0	0	PREDICTED: neutral ceramidase, partial [Bos mutus]	GO:0005576,GO:0016021,GO:0005739,GO:0005886,GO:0005509,GO:0102121,GO:0017040,GO:0008270,GO:0006915,GO:0046514,GO:0006672,GO:0042759,GO:0010033,GO:0046512,GO:0006670	extracellular region|integral component of membrane|mitochondrion|plasma membrane|calcium ion binding|ceramidase activity|N-acylsphingosine amidohydrolase activity|zinc ion binding|apoptotic process|ceramide catabolic process|ceramide metabolic process|long-chain fatty acid biosynthetic process|response to organic substance|sphingosine biosynthetic process|sphingosine metabolic process	bom00600,bom04071	Sphingolipid metabolism|Sphingolipid signaling pathway
ASB2	1	1	1	1	PREDICTED: ankyrin repeat and SOCS box protein 2 [Bos mutus]	GO:0005622,GO:0035556,GO:0016567	intracellular|intracellular signal transduction|protein ubiquitination
ASCL1	1	1	0	1	PREDICTED: achaete-scute homolog 1 [Bos mutus]
ASNS	0	0	0	1	hypothetical protein [Bos mutus]	GO:0005829,GO:0004066,GO:0005524,GO:0042803,GO:0006529,GO:0042149,GO:0006541,GO:0070981,GO:0043066,GO:0045931	cytosol|asparagine synthase (glutamine-hydrolyzing) activity|ATP binding|protein homodimerization activity|asparagine biosynthetic process|cellular response to glucose starvation|glutamine metabolic process|L-asparagine biosynthetic process|negative regulation of apoptotic process|positive regulation of mitotic cell cycle	bom00250	Alanine, aspartate and glutamate metabolism
ASPA	1	1	0	0	PREDICTED: aspartoacylase isoform X1 [Bos mutus]	GO:0005737,GO:0005634,GO:0019807,GO:0016788,GO:0046872	cytoplasm|nucleus|aspartoacylase activity|hydrolase activity, acting on ester bonds|metal ion binding	bom00250,bom00340	Alanine, aspartate and glutamate metabolism|Histidine metabolism
ASPHD1	1	1	0	0	Aspartate beta-hydroxylase domain-containing protein 1, partial [Bos mutus]	GO:0016021,GO:0004597,GO:0042264	integral component of membrane|peptide-aspartate beta-dioxygenase activity|peptidyl-aspartic acid hydroxylation
ASPHD2	1	1	0	0	Aspartate beta-hydroxylase domain-containing protein 2, partial [Bos mutus]	GO:0016021,GO:0016020,GO:0046872,GO:0004597,GO:0042264	integral component of membrane|membrane|metal ion binding|peptide-aspartate beta-dioxygenase activity|peptidyl-aspartic acid hydroxylation
ASPM	0	1	1	1	PREDICTED: abnormal spindle-like microcephaly-associated protein isoform X1 [Bos mutus]	GO:0005737,GO:0005634,GO:0005819,GO:0005516,GO:0051301,GO:0007051	cytoplasm|nucleus|spindle|calmodulin binding|cell division|spindle organization
ASPN	1	0	0	0	PREDICTED: asporin [Bos mutus]	GO:0031012,GO:0005509,GO:0005518,GO:0030282,GO:0070171,GO:0030512	extracellular matrix|calcium ion binding|collagen binding|bone mineralization|negative regulation of tooth mineralization|negative regulation of transforming growth factor beta receptor signaling pathway
ASPRV1	1	1	1	1	PREDICTED: LOW QUALITY PROTEIN: retroviral-like aspartic protease 1 [Bos mutus]	GO:0016021,GO:0004190,GO:0016485,GO:0043588	integral component of membrane|aspartic-type endopeptidase activity|protein processing|skin development
ASTN1	0	1	0	0	PREDICTED: astrotactin-1 isoform X2 [Bos mutus]	GO:0030136,GO:0005768,GO:0009897,GO:0016021,GO:0043204,GO:0007626,GO:0007158,GO:0001764	clathrin-coated vesicle|endosome|external side of plasma membrane|integral component of membrane|perikaryon|locomotory behavior|neuron cell-cell adhesion|neuron migration
ASXL2	0	1	0	0	PREDICTED: putative Polycomb group protein ASXL2 [Bos mutus]	GO:0005654,GO:0035517,GO:0003682,GO:0003677,GO:0046872,GO:0042975,GO:0009887,GO:0045600,GO:0035360,GO:0045944,GO:0016579,GO:0006351	nucleoplasm|PR-DUB complex|chromatin binding|DNA binding|metal ion binding|peroxisome proliferator activated receptor binding|animal organ morphogenesis|positive regulation of fat cell differentiation|positive regulation of peroxisome proliferator activated receptor signaling pathway|positive regulation of transcription by RNA polymerase II|protein deubiquitination|transcription, DNA-templated
ATCAY	1	1	0	0	caytaxin isoform X1 [Physeter catodon]	GO:0030424,GO:0030054,GO:0005737,GO:0030425,GO:0031966,GO:0043005,GO:0045202,GO:0004309,GO:0019894,GO:0050699,GO:0006915,GO:0048311,GO:2000212,GO:0031175,GO:0006798,GO:0032880	axon|cell junction|cytoplasm|dendrite|mitochondrial membrane|neuron projection|synapse|exopolyphosphatase activity|kinesin binding|WW domain binding|apoptotic process|mitochondrion distribution|negative regulation of glutamate metabolic process|neuron projection development|polyphosphate catabolic process|regulation of protein localization
ATF3	1	1	1	1	hypothetical protein [Bos mutus]	GO:1990622,GO:0005730,GO:0005634,GO:0046982,GO:0042803,GO:0001078,GO:0000978,GO:0034198,GO:0030968,GO:0006094,GO:0070373,GO:1903984,GO:1990440,GO:0035914	CHOP-ATF3 complex|nucleolus|nucleus|protein heterodimerization activity|protein homodimerization activity|proximal promoter DNA-binding transcription repressor activity, RNA polymerase II-specific|RNA polymerase II proximal promoter sequence-specific DNA binding|cellular response to amino acid starvation|endoplasmic reticulum unfolded protein response|gluconeogenesis|negative regulation of ERK1 a…
ATF5	1	0	0	0	PREDICTED: cyclic AMP-dependent transcription factor ATF-5 [Bos mutus]
ATF7IP	0	1	0	1	PREDICTED: activating transcription factor 7-interacting protein 1 [Bos mutus]	GO:0005829,GO:0016604,GO:0005654,GO:0005634,GO:0005667,GO:0016887,GO:0003714,GO:0006306,GO:0000122,GO:0045892,GO:0045893,GO:0045898,GO:0016032	cytosol|nuclear body|nucleoplasm|nucleus|transcription factor complex|ATPase activity|transcription corepressor activity|DNA methylation|negative regulation of transcription by RNA polymerase II|negative regulation of transcription, DNA-templated|positive regulation of transcription, DNA-templated|regulation of RNA polymerase II transcriptional preinitiation complex assembly|viral process
ATG7	1	1	0	0	PREDICTED: ubiquitin-like modifier-activating enzyme ATG7 [Bos mutus]	GO:0030424,GO:0005930,GO:0005737,GO:0005829,GO:0005576,GO:1904813,GO:0000407,GO:0034774,GO:0019778,GO:0019779,GO:0042803,GO:0008134,GO:0004839,GO:0007568,GO:0000045,GO:0006914,GO:0075044,GO:0000422,GO:0006501,GO:0006464,GO:0071455,GO:0071315,GO:0006995,GO:0009267,GO:0051607,GO:0044805,GO:0016236,GO:0061025,GO:0090298,GO:1903204,GO:0043312,GO:0034727,GO:0043065,GO:0010508,GO:0045732,GO:0031401,GO:…	axon|axoneme|cytoplasm|cytosol|extracellular region|ficolin-1-rich granule lumen|phagophore assembly site|secretory granule lumen|Atg12 activating enzyme activity|Atg8 activating enzyme activity|protein homodimerization activity|transcription factor binding|ubiquitin activating enzyme activity|aging|autophagosome assembly|autophagy|autophagy of host cells involved in interaction with symbiont|aut…	bom04136,bom04140,bom04216,bom04613	Autophagy - other|Autophagy - animal|Ferroptosis|Neutrophil extracellular trap formation
ATG9B	0	1	0	0	PREDICTED: autophagy-related protein 9B [Bos mutus]	GO:0005776,GO:0000421,GO:0031410,GO:0016021,GO:0000407,GO:0000045,GO:0000422,GO:0044805,GO:0034497	autophagosome|autophagosome membrane|cytoplasmic vesicle|integral component of membrane|phagophore assembly site|autophagosome assembly|autophagy of mitochondrion|late nucleophagy|protein localization to phagophore assembly site	bom04136,bom04137,bom04140	Autophagy - other|Mitophagy - animal|Autophagy - animal
ATOX1	0	1	1	1	copper transport protein ATOX1 [Ovis aries]	GO:0005829,GO:0016531,GO:0006878,GO:0006825,GO:0015680,GO:0006979	cytosol|copper chaperone activity|cellular copper ion homeostasis|copper ion transport|protein maturation by copper ion transfer|response to oxidative stress	bom04978	Mineral absorption
ATP10B	1	1	1	1	PREDICTED: probable phospholipid-transporting ATPase VB [Bos mutus]	GO:0030659,GO:0005783,GO:0005789,GO:0016021,GO:0005886,GO:0005524,GO:0000287,GO:0004012,GO:0045332	cytoplasmic vesicle membrane|endoplasmic reticulum|endoplasmic reticulum membrane|integral component of membrane|plasma membrane|ATP binding|magnesium ion binding|phospholipid-translocating ATPase activity|phospholipid translocation
ATP10D	0	1	0	0	PREDICTED: probable phospholipid-transporting ATPase VD [Bos mutus]	GO:0005783,GO:0005789,GO:0016021,GO:0005654,GO:0005886,GO:0005524,GO:0000287,GO:0004012,GO:0006812,GO:0034220,GO:0045332	endoplasmic reticulum|endoplasmic reticulum membrane|integral component of membrane|nucleoplasm|plasma membrane|ATP binding|magnesium ion binding|phospholipid-translocating ATPase activity|cation transport|ion transmembrane transport|phospholipid translocation
ATP13A4	1	1	0	1	probable cation-transporting ATPase 13A4 isoform X1 [Odocoileus virginianus texanus]	GO:0016021,GO:0005886,GO:0005524,GO:0019829,GO:0046872,GO:0006874,GO:0034220	integral component of membrane|plasma membrane|ATP binding|cation-transporting ATPase activity|metal ion binding|cellular calcium ion homeostasis|ion transmembrane transport
ATP1A1	0	1	0	0	sodium/potassium-transporting ATPase subunit alpha-1 [Bos taurus]	GO:0016021,GO:0005886,GO:0042383,GO:0005524,GO:0046872,GO:0005391,GO:0015991,GO:0030007,GO:0006883,GO:0010107,GO:0002028,GO:0036376	integral component of membrane|plasma membrane|sarcolemma|ATP binding|metal ion binding|sodium:potassium-exchanging ATPase activity|ATP hydrolysis coupled proton transport|cellular potassium ion homeostasis|cellular sodium ion homeostasis|potassium ion import|regulation of sodium ion transport|sodium ion export across plasma membrane	bom04022,bom04024,bom04260,bom04261,bom04911,bom04918,bom04919,bom04925,bom04960,bom04961,bom04964,bom04970,bom04971,bom04972,bom04973,bom04974,bom04976,bom04978	cGMP-PKG signaling pathway|cAMP signaling pathway|Cardiac muscle contraction|Adrenergic signaling in cardiomyocytes|Insulin secretion|Thyroid hormone synthesis|Thyroid hormone signaling pathway|Aldosterone synthesis and secretion|Aldosterone-regulated sodium reabsorption|Endocrine and other factor-regulated calcium reabsorption|Proximal tubule bicarbonate reclamation|Salivary secretion|Gastric ac…
ATP1A3	1	1	0	0	PREDICTED: sodium/potassium-transporting ATPase subunit alpha-3 isoform X1 [Bos mutus]	GO:0030424,GO:0005783,GO:1903561,GO:0005794,GO:0016021,GO:0016020,GO:0043025,GO:0032809,GO:0005886,GO:0005890,GO:0045202,GO:0001540,GO:0005524,GO:0051087,GO:0099520,GO:0046872,GO:0005391,GO:1990239,GO:0015991,GO:0086064,GO:0030007,GO:1904646,GO:0071383,GO:0006883,GO:1990535,GO:0010107,GO:0060075,GO:1903416,GO:0036376	axon|endoplasmic reticulum|extracellular vesicle|Golgi apparatus|integral component of membrane|membrane|neuronal cell body|neuronal cell body membrane|plasma membrane|sodium:potassium-exchanging ATPase complex|synapse|amyloid-beta binding|ATP binding|chaperone binding|ion antiporter activity involved in regulation of presynaptic membrane potential|metal ion binding|sodium:potassium-exchanging AT…	bom04022,bom04024,bom04260,bom04261,bom04911,bom04918,bom04919,bom04925,bom04960,bom04961,bom04964,bom04970,bom04971,bom04972,bom04973,bom04974,bom04976,bom04978	cGMP-PKG signaling pathway|cAMP signaling pathway|Cardiac muscle contraction|Adrenergic signaling in cardiomyocytes|Insulin secretion|Thyroid hormone synthesis|Thyroid hormone signaling pathway|Aldosterone synthesis and secretion|Aldosterone-regulated sodium reabsorption|Endocrine and other factor-regulated calcium reabsorption|Proximal tubule bicarbonate reclamation|Salivary secretion|Gastric ac…
ATP1B1	1	1	0	1	PREDICTED: sodium/potassium-transporting ATPase subunit beta-1 isoform X1 [Bos mutus]	GO:0016324,GO:0016323,GO:0014704,GO:0005622,GO:0043209,GO:0042383,GO:0005890,GO:0005524,GO:0001671,GO:0051117,GO:0030955,GO:0008022,GO:0019901,GO:0031402,GO:0005391,GO:0046034,GO:0060048,GO:0007155,GO:0006874,GO:0030007,GO:0006883,GO:0086009,GO:1903281,GO:1903288,GO:1901018,GO:1903278,GO:0010107,GO:0072659,GO:0050821,GO:0010882,GO:0010468,GO:0055119,GO:0036376	apical plasma membrane|basolateral plasma membrane|intercalated disc|intracellular|myelin sheath|sarcolemma|sodium:potassium-exchanging ATPase complex|ATP binding|ATPase activator activity|ATPase binding|potassium ion binding|protein C-terminus binding|protein kinase binding|sodium ion binding|sodium:potassium-exchanging ATPase activity|ATP metabolic process|cardiac muscle contraction|cell adhesi…	bom04022,bom04024,bom04260,bom04261,bom04911,bom04918,bom04919,bom04925,bom04960,bom04961,bom04964,bom04970,bom04971,bom04972,bom04973,bom04974,bom04976,bom04978	cGMP-PKG signaling pathway|cAMP signaling pathway|Cardiac muscle contraction|Adrenergic signaling in cardiomyocytes|Insulin secretion|Thyroid hormone synthesis|Thyroid hormone signaling pathway|Aldosterone synthesis and secretion|Aldosterone-regulated sodium reabsorption|Endocrine and other factor-regulated calcium reabsorption|Proximal tubule bicarbonate reclamation|Salivary secretion|Gastric ac…
ATP5A1	1	1	0	0	PREDICTED: ATP synthase subunit alpha, mitochondrial [Chlorocebus sabaeus]	GO:0005753,GO:0000275,GO:0005886,GO:0043531,GO:0005524,GO:0046933,GO:0006754,GO:0046034,GO:0015986,GO:0022900,GO:0006979	mitochondrial proton-transporting ATP synthase complex|mitochondrial proton-transporting ATP synthase complex, catalytic core F(1)|plasma membrane|ADP binding|ATP binding|proton-transporting ATP synthase activity, rotational mechanism|ATP biosynthetic process|ATP metabolic process|ATP synthesis coupled proton transport|electron transport chain|response to oxidative stress	bom00190,bom04714,bom05010,bom05012,bom05014,bom05016,bom05020,bom05022,bom05415	Oxidative phosphorylation|Thermogenesis|Alzheimer disease|Parkinson disease|Amyotrophic lateral sclerosis|Huntington disease|Prion disease|Pathways of neurodegeneration - multiple diseases|Diabetic cardiomyopathy
ATP6V0A1	0	1	1	1	V-type proton ATPase 116 kDa subunit a isoform X4 [Bubalus bubalis]	GO:0030659,GO:0016021,GO:0042470,GO:0005886,GO:0016471,GO:0000220,GO:0051117,GO:0046961,GO:0015991,GO:0007035	cytoplasmic vesicle membrane|integral component of membrane|melanosome|plasma membrane|vacuolar proton-transporting V-type ATPase complex|vacuolar proton-transporting V-type ATPase, V0 domain|ATPase binding|proton-transporting ATPase activity, rotational mechanism|ATP hydrolysis coupled proton transport|vacuolar acidification	bom00190,bom04142,bom04145,bom04721,bom04966,bom05152,bom05165,bom05323	Oxidative phosphorylation|Lysosome|Phagosome|Synaptic vesicle cycle|Collecting duct acid secretion|Tuberculosis|Human papillomavirus infection|Rheumatoid arthritis
ATP6V0A4	1	1	0	1	PREDICTED: V-type proton ATPase 116 kDa subunit a isoform 4 [Bos mutus]	GO:0045177,GO:0016324,GO:0031526,GO:0005768,GO:0010008,GO:0070062,GO:0016021,GO:0005765,GO:0030670,GO:0005886,GO:0016471,GO:0000220,GO:0051117,GO:0046961,GO:0015991,GO:0007588,GO:0008286,GO:0034220,GO:0001503,GO:1902600,GO:0006885,GO:0007605,GO:0033572,GO:0007035	apical part of cell|apical plasma membrane|brush border membrane|endosome|endosome membrane|extracellular exosome|integral component of membrane|lysosomal membrane|phagocytic vesicle membrane|plasma membrane|vacuolar proton-transporting V-type ATPase complex|vacuolar proton-transporting V-type ATPase, V0 domain|ATPase binding|proton-transporting ATPase activity, rotational mechanism|ATP hydrolysi…	bom00190,bom04142,bom04145,bom04721,bom04966,bom05152,bom05165,bom05323	Oxidative phosphorylation|Lysosome|Phagosome|Synaptic vesicle cycle|Collecting duct acid secretion|Tuberculosis|Human papillomavirus infection|Rheumatoid arthritis
ATP6V0B	0	1	0	0	PREDICTED: V-type proton ATPase 21 kDa proteolipid subunit isoform X1 [Bos mutus]	GO:0005768,GO:0016021,GO:0033179,GO:0005774,GO:0046961,GO:0015991	endosome|integral component of membrane|proton-transporting V-type ATPase, V0 domain|vacuolar membrane|proton-transporting ATPase activity, rotational mechanism|ATP hydrolysis coupled proton transport	bom00190,bom04142,bom04145,bom04721,bom05152,bom05165,bom05323	Oxidative phosphorylation|Lysosome|Phagosome|Synaptic vesicle cycle|Tuberculosis|Human papillomavirus infection|Rheumatoid arthritis
ATP6V1A	1	1	0	1	V-type proton ATPase catalytic subunit A [Bos taurus]	GO:0016324,GO:0005829,GO:0005902,GO:0043209,GO:0005886,GO:0033180,GO:0005774,GO:0005524,GO:0046961,GO:0015991,GO:0046034,GO:0006879,GO:0036295	apical plasma membrane|cytosol|microvillus|myelin sheath|plasma membrane|proton-transporting V-type ATPase, V1 domain|vacuolar membrane|ATP binding|proton-transporting ATPase activity, rotational mechanism|ATP hydrolysis coupled proton transport|ATP metabolic process|cellular iron ion homeostasis|cellular response to increased oxygen levels	bom00190,bom04145,bom04150,bom04721,bom04966,bom05165,bom05323	Oxidative phosphorylation|Phagosome|mTOR signaling pathway|Synaptic vesicle cycle|Collecting duct acid secretion|Human papillomavirus infection|Rheumatoid arthritis
ATP6V1C2	0	1	1	1	PREDICTED: V-type proton ATPase subunit C 2 isoform X1 [Bos mutus]	GO:0005829,GO:0070062,GO:0005765,GO:0000221,GO:0046983,GO:0008553,GO:0046961,GO:0015991,GO:0008286,GO:0034220,GO:0030177,GO:0016241,GO:0033572	cytosol|extracellular exosome|lysosomal membrane|vacuolar proton-transporting V-type ATPase, V1 domain|protein dimerization activity|proton-exporting ATPase activity, phosphorylative mechanism|proton-transporting ATPase activity, rotational mechanism|ATP hydrolysis coupled proton transport|insulin receptor signaling pathway|ion transmembrane transport|positive regulation of Wnt signaling pathway|…	bom00190,bom04145,bom04150,bom04721,bom04966,bom05165,bom05323	Oxidative phosphorylation|Phagosome|mTOR signaling pathway|Synaptic vesicle cycle|Collecting duct acid secretion|Human papillomavirus infection|Rheumatoid arthritis
ATP6V1G2	0	1	0	0	V-type proton ATPase subunit G 2 isoform X1 [Bos taurus]	GO:0005829,GO:0042470,GO:0016471,GO:0042626,GO:0008286,GO:0034220,GO:1902600,GO:0016241,GO:0033572	cytosol|melanosome|vacuolar proton-transporting V-type ATPase complex|ATPase activity, coupled to transmembrane movement of substances|insulin receptor signaling pathway|ion transmembrane transport|proton transmembrane transport|regulation of macroautophagy|transferrin transport	bom00190,bom04145,bom04150,bom04721,bom04966,bom05165,bom05323	Oxidative phosphorylation|Phagosome|mTOR signaling pathway|Synaptic vesicle cycle|Collecting duct acid secretion|Human papillomavirus infection|Rheumatoid arthritis
ATP8B1	0	1	0	1	PREDICTED: phospholipid-transporting ATPase IC [Bos mutus]	GO:0016324,GO:0005783,GO:0005794,GO:0005887,GO:0005886,GO:0032420,GO:0005524,GO:0000287,GO:0004012,GO:0015721,GO:0006855,GO:0007030,GO:0034220,GO:0045892,GO:0045332,GO:0032534,GO:0007605	apical plasma membrane|endoplasmic reticulum|Golgi apparatus|integral component of plasma membrane|plasma membrane|stereocilium|ATP binding|magnesium ion binding|phospholipid-translocating ATPase activity|bile acid and bile salt transport|drug transmembrane transport|Golgi organization|ion transmembrane transport|negative regulation of transcription, DNA-templated|phospholipid translocation|regul…
ATXN10	0	1	0	0	hypothetical protein [Bos mutus]	GO:0048471	perinuclear region of cytoplasm	bom05017	Spinocerebellar ataxia
ATXN3	1	1	1	1	hypothetical protein [Bos mutus]			bom04141,bom05017,bom05022	Protein processing in endoplasmic reticulum|Spinocerebellar ataxia|Pathways of neurodegeneration - multiple diseases
AURKA	0	1	1	1	aurora kinase A [Bos taurus]	GO:0043203,GO:0005814,GO:0005813,GO:0032133,GO:0005929,GO:0000780,GO:0070938,GO:0005737,GO:0005829,GO:0042585,GO:0072687,GO:0097431,GO:0048471,GO:0045120,GO:0005876,GO:0051233,GO:0000922,GO:0031616,GO:0005524,GO:0035174,GO:0046982,GO:0004672,GO:0019901,GO:0031625,GO:0009948,GO:0051301,GO:0051642,GO:0097421,GO:0007100,GO:0007052,GO:0043066,GO:0032091,GO:1990138,GO:1900195,GO:0032436,GO:0071539,GO:…	axon hillock|centriole|centrosome|chromosome passenger complex|cilium|condensed nuclear chromosome, centromeric region|contractile ring|cytoplasm|cytosol|germinal vesicle|meiotic spindle|mitotic spindle pole|perinuclear region of cytoplasm|pronucleus|spindle microtubule|spindle midzone|spindle pole|spindle pole centrosome|ATP binding|histone serine kinase activity|protein heterodimerization activ…	bom04114,bom04914	Oocyte meiosis|Progesterone-mediated oocyte maturation
AURKC	0	1	0	1	aurora kinase C [Bos taurus]	GO:0032133,GO:0000793,GO:0000780,GO:0005737,GO:0030496,GO:0005819,GO:0005876,GO:0051233,GO:0031616,GO:0005524,GO:0035174,GO:0004672,GO:0004712,GO:0008608,GO:0051301,GO:0016570,GO:0051321,GO:0051256,GO:0007052,GO:0048599,GO:0032467,GO:0006468,GO:0032465,GO:0007283	chromosome passenger complex|condensed chromosome|condensed nuclear chromosome, centromeric region|cytoplasm|midbody|spindle|spindle microtubule|spindle midzone|spindle pole centrosome|ATP binding|histone serine kinase activity|protein kinase activity|protein serine/threonine/tyrosine kinase activity|attachment of spindle microtubules to kinetochore|cell division|histone modification|meiotic cell…
AVL9	0	1	1	1	PREDICTED: late secretory pathway protein AVL9 homolog [Bos mutus]	GO:0016021,GO:0055037,GO:0016477	integral component of membrane|recycling endosome|cell migration
AXDND1	0	1	0	1	PREDICTED: axonemal dynein light chain domain-containing protein 1 [Bos mutus]
AXL	1	1	0	0	PREDICTED: tyrosine-protein kinase receptor UFO [Bos mutus]			bom01521	EGFR tyrosine kinase inhibitor resistance
AZGP1	0	1	1	0	PREDICTED: zinc-alpha-2-glycoprotein [Capra hircus]	GO:0005615,GO:0005886,GO:0007155,GO:0001580,GO:0006955	extracellular space|plasma membrane|cell adhesion|detection of chemical stimulus involved in sensory perception of bitter taste|immune response
AZIN2	1	1	0	0	antizyme inhibitor 2 [Bos mutus]	GO:0030424,GO:0005801,GO:0005737,GO:0031410,GO:0005829,GO:0030425,GO:0033116,GO:1990005,GO:0005739,GO:0005634,GO:0043204,GO:0048471,GO:0005802,GO:0030133,GO:0008792,GO:0042978,GO:0015489,GO:0097055,GO:0042177,GO:0043085,GO:1902269,GO:0033387,GO:0015847,GO:0007283,GO:0098629	axon|cis-Golgi network|cytoplasm|cytoplasmic vesicle|cytosol|dendrite|endoplasmic reticulum-Golgi intermediate compartment membrane|granular vesicle|mitochondrion|nucleus|perikaryon|perinuclear region of cytoplasm|trans-Golgi network|transport vesicle|arginine decarboxylase activity|ornithine decarboxylase activator activity|putrescine transmembrane transporter activity|agmatine biosynthetic proc…	bom00330	Arginine and proline metabolism
B2M	1	1	0	0	PREDICTED: beta-2-microglobulin isoform X1 [Bos mutus]	GO:0005829,GO:0009897,GO:0005576,GO:0005794,GO:1990712,GO:0042612,GO:0042802,GO:0019885,GO:0002481,GO:0071283,GO:0033216,GO:0006955,GO:0055072,GO:0010977,GO:1900121,GO:1904434,GO:0048260,GO:0002726,GO:0001916,GO:1904437,GO:0042026,GO:0045646,GO:1900390,GO:0002237,GO:0033077	cytosol|external side of plasma membrane|extracellular region|Golgi apparatus|HFE-transferrin receptor complex|MHC class I protein complex|identical protein binding|antigen processing and presentation of endogenous peptide antigen via MHC class I|antigen processing and presentation of exogenous protein antigen via MHC class Ib, TAP-dependent|cellular response to iron(III) ion|ferric iron import|i…	bom04612,bom05163,bom05166,bom05168,bom05169,bom05170	Antigen processing and presentation|Human cytomegalovirus infection|Human T-cell leukemia virus 1 infection|Herpes simplex virus 1 infection|Epstein-Barr virus infection|Human immunodeficiency virus 1 infection
B3GALNT1	0	1	0	0	hypothetical protein [Bos mutus]	GO:0005783,GO:0005794,GO:0000139,GO:0016021,GO:0008376,GO:0047273,GO:0008499,GO:0009312,GO:0006486,GO:0006487	endoplasmic reticulum|Golgi apparatus|Golgi membrane|integral component of membrane|acetylgalactosaminyltransferase activity|galactosylgalactosylglucosylceramide beta-D-acetylgalactosaminyltransferase activity|UDP-galactose:beta-N-acetylglucosamine beta-1,3-galactosyltransferase activity|oligosaccharide biosynthetic process|protein glycosylation|protein N-linked glycosylation	bom00601,bom00603	Glycosphingolipid biosynthesis - lacto and neolacto series|Glycosphingolipid biosynthesis - globo and isoglobo series
B3GAT1	0	1	0	0	PREDICTED: galactosylgalactosylxylosylprotein 3-beta-glucuronosyltransferase 1 [Bison bison bison]	GO:0005789,GO:0005576,GO:0000139,GO:0016021,GO:0043231,GO:0015018,GO:0046872,GO:0008499,GO:0005975,GO:0050650,GO:0030203,GO:0006486	endoplasmic reticulum membrane|extracellular region|Golgi membrane|integral component of membrane|intracellular membrane-bounded organelle|galactosylgalactosylxylosylprotein 3-beta-glucuronosyltransferase activity|metal ion binding|UDP-galactose:beta-N-acetylglucosamine beta-1,3-galactosyltransferase activity|carbohydrate metabolic process|chondroitin sulfate proteoglycan biosynthetic process|gly…	bom00515	Mannose type O-glycan biosynthesis
B3GNT3	0	1	1	1	PREDICTED: N-acetyllactosaminide beta-1,3-N-acetylglucosaminyltransferase 3 [Bos mutus]			bom00512,bom00601	Mucin type O-glycan biosynthesis|Glycosphingolipid biosynthesis - lacto and neolacto series
B3GNT7	0	0	1	0	PREDICTED: UDP-GlcNAc:betaGal beta-1,3-N-acetylglucosaminyltransferase 7 [Bos mutus]			bom00533	Glycosaminoglycan biosynthesis - keratan sulfate
B3GNT8	1	0	0	0	hypothetical protein [Bos mutus]	GO:0005783,GO:0070062,GO:0005794,GO:0000139,GO:0016021,GO:0008376,GO:0008532,GO:0016262,GO:0008499,GO:0016266,GO:0030311,GO:0006486	endoplasmic reticulum|extracellular exosome|Golgi apparatus|Golgi membrane|integral component of membrane|acetylgalactosaminyltransferase activity|N-acetyllactosaminide beta-1,3-N-acetylglucosaminyltransferase activity|protein N-acetylglucosaminyltransferase activity|UDP-galactose:beta-N-acetylglucosamine beta-1,3-galactosyltransferase activity|O-glycan processing|poly-N-acetyllactosamine biosynt…
B3GNT9	1	1	0	0	PREDICTED: UDP-GlcNAc:betaGal beta-1,3-N-acetylglucosaminyltransferase 9 [Bos mutus]	GO:0005783,GO:0005794,GO:0000139,GO:0016021,GO:0008376,GO:0008378,GO:0008532,GO:0030311,GO:0006486	endoplasmic reticulum|Golgi apparatus|Golgi membrane|integral component of membrane|acetylgalactosaminyltransferase activity|galactosyltransferase activity|N-acetyllactosaminide beta-1,3-N-acetylglucosaminyltransferase activity|poly-N-acetyllactosamine biosynthetic process|protein glycosylation
B4GALNT2	1	1	1	1	Beta-1,4 N-acetylgalactosaminyltransferase 2, partial [Bos mutus]
B4GALNT4	1	1	0	1	PREDICTED: N-acetyl-beta-glucosaminyl-glycoprotein 4-beta-N-acetylgalactosaminyltransferase 1 [Bos mutus]	GO:0032580,GO:0016021,GO:0008376,GO:0033842	Golgi cisterna membrane|integral component of membrane|acetylgalactosaminyltransferase activity|N-acetyl-beta-glucosaminyl-glycoprotein 4-beta-N-acetylgalactosaminyltransferase activity	bom00513	Various types of N-glycan biosynthesis
B4GALT1	1	0	0	0	PREDICTED: LOW QUALITY PROTEIN: beta-1,4-galactosyltransferase 1 [Bos mutus]	GO:0016323,GO:0031526,GO:0030057,GO:0009897,GO:0005615,GO:0030175,GO:0005794,GO:0032580,GO:0000138,GO:0016021,GO:0043014,GO:0003831,GO:0048487,GO:0004461,GO:0030145,GO:0003945,GO:0042803,GO:0035250,GO:0002526,GO:0060055,GO:0007339,GO:0007155,GO:0045136,GO:0002064,GO:0030198,GO:0006012,GO:0005989,GO:0050900,GO:0008285,GO:0009312,GO:0007341,GO:0043065,GO:0060054,GO:0042125,GO:0051260,GO:0006487,GO:…	basolateral plasma membrane|brush border membrane|desmosome|external side of plasma membrane|extracellular space|filopodium|Golgi apparatus|Golgi cisterna membrane|Golgi trans cisterna|integral component of membrane|alpha-tubulin binding|beta-N-acetylglucosaminylglycopeptide beta-1,4-galactosyltransferase activity|beta-tubulin binding|lactose synthase activity|manganese ion binding|N-acetyllactos…	bom00052,bom00510,bom00513,bom00514,bom00515,bom00533,bom00601	Galactose metabolism|N-Glycan biosynthesis|Various types of N-glycan biosynthesis|Other types of O-glycan biosynthesis|Mannose type O-glycan biosynthesis|Glycosaminoglycan biosynthesis - keratan sulfate|Glycosphingolipid biosynthesis - lacto and neolacto series
B4GALT2	0	1	0	0	Beta-1,4-galactosyltransferase 2, partial [Bos mutus]	GO:0032580,GO:0016021,GO:0005654,GO:0003831,GO:0004461,GO:0046872,GO:0003945,GO:0005975,GO:0021680,GO:0007626,GO:0007613,GO:0006486,GO:0008542	Golgi cisterna membrane|integral component of membrane|nucleoplasm|beta-N-acetylglucosaminylglycopeptide beta-1,4-galactosyltransferase activity|lactose synthase activity|metal ion binding|N-acetyllactosamine synthase activity|carbohydrate metabolic process|cerebellar Purkinje cell layer development|locomotory behavior|memory|protein glycosylation|visual learning	bom00052,bom00510,bom00513,bom00514,bom00515,bom00533,bom00601	Galactose metabolism|N-Glycan biosynthesis|Various types of N-glycan biosynthesis|Other types of O-glycan biosynthesis|Mannose type O-glycan biosynthesis|Glycosaminoglycan biosynthesis - keratan sulfate|Glycosphingolipid biosynthesis - lacto and neolacto series
B4GALT6	0	1	0	0	beta-1,4-galactosyltransferase 6 [Vulpes vulpes]			bom00600	Sphingolipid metabolism
BAIAP3	0	1	0	0	PREDICTED: BAI1-associated protein 3 [Bos mutus]	GO:0005829,GO:0031902,GO:0005886,GO:0098793,GO:0055038,GO:0032588,GO:0005509,GO:0005543,GO:0000149,GO:0019905,GO:1990502,GO:0006887,GO:0007186,GO:0035774,GO:0001956,GO:1905413,GO:0032228,GO:0042147	cytosol|late endosome membrane|plasma membrane|presynapse|recycling endosome membrane|trans-Golgi network membrane|calcium ion binding|phospholipid binding|SNARE binding|syntaxin binding|dense core granule maturation|exocytosis|G protein-coupled receptor signaling pathway|positive regulation of insulin secretion involved in cellular response to glucose stimulus|positive regulation of neurotransmi…	bom05202	Transcriptional misregulation in cancer
BARX2	1	1	0	1	homeobox protein BarH-like 2 [Bos taurus]	GO:0005829,GO:0005654,GO:0005634,GO:0005667,GO:0003682,GO:0003677,GO:0001228,GO:0000981,GO:0000977,GO:0048513,GO:0001502,GO:0014902,GO:0000122,GO:0045944,GO:0006357,GO:0009888	cytosol|nucleoplasm|nucleus|transcription factor complex|chromatin binding|DNA binding|DNA-binding transcription activator activity, RNA polymerase II-specific|DNA-binding transcription factor activity, RNA polymerase II-specific|RNA polymerase II regulatory region sequence-specific DNA binding|animal organ development|cartilage condensation|myotube differentiation|negative regulation of transcri…
BASP1	1	1	1	1	hypothetical protein I79_011772 [Cricetulus griseus]
BBOX1	1	1	0	0	gamma-butyrobetaine dioxygenase [Bos taurus]	GO:0005739,GO:0008336,GO:0042802,GO:0005506,GO:0016702,GO:0008270,GO:0045329	mitochondrion|gamma-butyrobetaine dioxygenase activity|identical protein binding|iron ion binding|oxidoreductase activity, acting on single donors with incorporation of molecular oxygen, incorporation of two atoms of oxygen|zinc ion binding|carnitine biosynthetic process	bom00310	Lysine degradation
BCAR3	0	1	0	0	PREDICTED: breast cancer anti-estrogen resistance protein 3 isoform X2 [Bos mutus]	GO:0005622,GO:0005085,GO:0033138,GO:0007264	intracellular|guanyl-nucleotide exchange factor activity|positive regulation of peptidyl-serine phosphorylation|small GTPase mediated signal transduction
BCAS1	1	1	1	1	hypothetical protein [Bos mutus]	GO:0005737,GO:0070062,GO:0042552	cytoplasm|extracellular exosome|myelination
BCAS4	0	1	0	0	PREDICTED: breast carcinoma-amplified sequence 4 [Bos mutus]
BCCIP	0	0	1	1	PREDICTED: BRCA2 and CDKN1A-interacting protein isoform X1 [Bos mutus]	GO:0005814,GO:0005813,GO:0005829,GO:0097431,GO:0019908,GO:0005654,GO:0019207,GO:0015631,GO:0006974,GO:0006281,GO:0000132,GO:0034453,GO:0000226,GO:0090307,GO:0007052,GO:0061101,GO:0000079,GO:0000055	centriole|centrosome|cytosol|mitotic spindle pole|nuclear cyclin-dependent protein kinase holoenzyme complex|nucleoplasm|kinase regulator activity|tubulin binding|cellular response to DNA damage stimulus|DNA repair|establishment of mitotic spindle orientation|microtubule anchoring|microtubule cytoskeleton organization|mitotic spindle assembly|mitotic spindle organization|neuroendocrine cell diffe…
BCHE	0	0	0	1	PREDICTED: cholinesterase [Bos mutus]	GO:0005783,GO:0005576,GO:0005641,GO:0003990,GO:0004104,GO:0042802	endoplasmic reticulum|extracellular region|nuclear envelope lumen|acetylcholinesterase activity|cholinesterase activity|identical protein binding
BCKDHA	1	1	0	1	PREDICTED: 2-oxoisovalerate dehydrogenase subunit alpha, mitochondrial isoform X1 [Bos mutus]	GO:0005947,GO:0003863,GO:0003826,GO:0046872,GO:0009083	mitochondrial alpha-ketoglutarate dehydrogenase complex|3-methyl-2-oxobutanoate dehydrogenase (2-methylpropanoyl-transferring) activity|alpha-ketoacid dehydrogenase activity|metal ion binding|branched-chain amino acid catabolic process	bom00280,bom00640	Valine, leucine and isoleucine degradation|Propanoate metabolism
BCKDHB	0	1	0	0	PREDICTED: 2-oxoisovalerate dehydrogenase subunit beta, mitochondrial [Bos mutus]	GO:0005947,GO:0005739,GO:0003863,GO:0003826,GO:0009083,GO:0007584	mitochondrial alpha-ketoglutarate dehydrogenase complex|mitochondrion|3-methyl-2-oxobutanoate dehydrogenase (2-methylpropanoyl-transferring) activity|alpha-ketoacid dehydrogenase activity|branched-chain amino acid catabolic process|response to nutrient	bom00280,bom00640	Valine, leucine and isoleucine degradation|Propanoate metabolism
BCL2A1	0	1	0	0	PREDICTED: bcl-2-related protein A1 [Capra hircus]	GO:0005741,GO:0046982,GO:0042803,GO:0097192,GO:0008630,GO:0043066,GO:2001243	mitochondrial outer membrane|protein heterodimerization activity|protein homodimerization activity|extrinsic apoptotic signaling pathway in absence of ligand|intrinsic apoptotic signaling pathway in response to DNA damage|negative regulation of apoptotic process|negative regulation of intrinsic apoptotic signaling pathway	bom04064,bom04210,bom05202,bom05221	NF-kappa B signaling pathway|Apoptosis|Transcriptional misregulation in cancer|Acute myeloid leukemia
BCL6B	1	1	0	0	PREDICTED: B-cell CLL/lymphoma 6 member B protein [Bos mutus]	GO:0005634,GO:0003677,GO:0000981,GO:0001227,GO:0046872,GO:0000977	nucleus|DNA binding|DNA-binding transcription factor activity, RNA polymerase II-specific|DNA-binding transcription repressor activity, RNA polymerase II-specific|metal ion binding|RNA polymerase II regulatory region sequence-specific DNA binding
BCO2	0	1	0	1	PREDICTED: beta,beta-carotene 9',10'-oxygenase [Bos indicus]	GO:0005622,GO:0005759,GO:0005739,GO:0102076,GO:0003834,GO:0010436,GO:0046872,GO:0016702,GO:0004744,GO:0016121,GO:0016119,GO:0016116,GO:0055114,GO:0051881,GO:2000377,GO:0042574,GO:0042573,GO:0001523,GO:0016122	intracellular|mitochondrial matrix|mitochondrion|beta,beta-carotene-9',10'-cleaving oxygenase activity|beta-carotene 15,15'-monooxygenase activity|carotenoid dioxygenase activity|metal ion binding|oxidoreductase activity, acting on single donors with incorporation of molecular oxygen, incorporation of two atoms of oxygen|retinal isomerase activity|carotene catabolic process|carotene metabolic pro…
BDH1	1	1	1	1	D-beta-hydroxybutyrate dehydrogenase, mitochondrial isoform X1 [Bos indicus x Bos taurus]	GO:0099617,GO:0005759,GO:0005654,GO:0003858	matrix side of mitochondrial inner membrane|mitochondrial matrix|nucleoplasm|3-hydroxybutyrate dehydrogenase activity	bom00072,bom00650	Synthesis and degradation of ketone bodies|Butanoate metabolism
BEGAIN	1	1	1	1	PREDICTED: brain-enriched guanylate kinase-associated protein [Bos mutus]	GO:0005737,GO:0016020	cytoplasm|membrane
BEND7	0	1	0	0	PREDICTED: BEN domain-containing protein 7 [Bos mutus]	GO:0070062	extracellular exosome
BEST2	1	1	0	0	PREDICTED: bestrophin-2 [Bos mutus]	GO:0034707,GO:0005929,GO:0005886,GO:0005254,GO:1902476,GO:0006821,GO:0051899,GO:0007608	chloride channel complex|cilium|plasma membrane|chloride channel activity|chloride transmembrane transport|chloride transport|membrane depolarization|sensory perception of smell	bom04970	Salivary secretion
BEX4	1	0	0	0	PREDICTED: protein BEX4 isoform X1 [Bison bison bison]	GO:0005737,GO:0005874,GO:0005634,GO:0000922,GO:0043014,GO:0042826,GO:0007059,GO:1904428,GO:0030334,GO:0042127	cytoplasm|microtubule|nucleus|spindle pole|alpha-tubulin binding|histone deacetylase binding|chromosome segregation|negative regulation of tubulin deacetylation|regulation of cell migration|regulation of cell proliferation
BEX5	1	1	0	1	protein BEX5 isoform X1 [Bos taurus]	GO:0005737	cytoplasm
BGN	1	0	0	0	BGN [Cervus elaphus hippelaphus]	GO:0009986,GO:0031012,GO:0005576,GO:0042383,GO:0030133,GO:0050840,GO:0005539,GO:0019800	cell surface|extracellular matrix|extracellular region|sarcolemma|transport vesicle|extracellular matrix binding|glycosaminoglycan binding|peptide cross-linking via chondroitin 4-sulfate glycosaminoglycan
BHLHE41	1	1	0	1	LOW QUALITY PROTEIN: class E basic helix-loop-helix protein 41 [Odocoileus virginianus texanus]	GO:0005634,GO:0043425,GO:0000981,GO:0001227,GO:0070888,GO:0042826,GO:0043426,GO:0046982,GO:0042803,GO:0001078,GO:0001102,GO:0000980,GO:0000978,GO:0000977,GO:0043565,GO:1990837,GO:0003714,GO:0008134,GO:0009887,GO:0030154,GO:0008283,GO:0032922,GO:0010832,GO:0010944,GO:0000122,GO:0045892,GO:0007219,GO:0050767,GO:0001756	nucleus|bHLH transcription factor binding|DNA-binding transcription factor activity, RNA polymerase II-specific|DNA-binding transcription repressor activity, RNA polymerase II-specific|E-box binding|histone deacetylase binding|MRF binding|protein heterodimerization activity|protein homodimerization activity|proximal promoter DNA-binding transcription repressor activity, RNA polymerase II-specific…	bom04710	Circadian rhythm
BICD1	0	0	0	1	protein bicaudal D homolog 1 isoform X2 [Bos indicus x Bos taurus]	GO:0005813,GO:0031410,GO:0005856,GO:0005829,GO:0005794,GO:0072517,GO:0016020,GO:0048471,GO:0005802,GO:0008093,GO:0034452,GO:0070840,GO:0045505,GO:0019901,GO:0031871,GO:0017137,GO:0005200,GO:0009653,GO:0008298,GO:0072393,GO:0072385,GO:1900275,GO:1900737,GO:1904781,GO:0048260,GO:0033365,GO:0070507,GO:1900276,GO:0006396,GO:0034063,GO:0016032	centrosome|cytoplasmic vesicle|cytoskeleton|cytosol|Golgi apparatus|host cell viral assembly compartment|membrane|perinuclear region of cytoplasm|trans-Golgi network|cytoskeletal adaptor activity|dynactin binding|dynein complex binding|dynein intermediate chain binding|protein kinase binding|proteinase activated receptor binding|Rab GTPase binding|structural constituent of cytoskeleton|anatomical…
BICD2	0	1	0	0	protein bicaudal D homolog 2 isoform X1 [Bos taurus]	GO:0005642,GO:0005813,GO:0005737,GO:0031410,GO:0005829,GO:0005794,GO:0005635,GO:0005643,GO:0005886,GO:0008093,GO:0034452,GO:0070840,GO:0051959,GO:0017137,GO:0051642,GO:0072393,GO:0007018,GO:0072385,GO:0051028,GO:0034067,GO:0015031,GO:0070507,GO:0006890	annulate lamellae|centrosome|cytoplasm|cytoplasmic vesicle|cytosol|Golgi apparatus|nuclear envelope|nuclear pore|plasma membrane|cytoskeletal adaptor activity|dynactin binding|dynein complex binding|dynein light intermediate chain binding|Rab GTPase binding|centrosome localization|microtubule anchoring at microtubule organizing center|microtubule-based movement|minus-end-directed organelle transp…
BIN1	1	1	0	1	myc box-dependent-interacting protein 1 isoform X1 [Bos taurus]			bom04144,bom04666	Endocytosis|Fc gamma R-mediated phagocytosis
BIN2	0	1	0	0	PREDICTED: bridging integrator 2 [Bos mutus]	GO:0005938,GO:0030054,GO:0042995,GO:0005576,GO:1904813,GO:0001891,GO:0005886,GO:0002102,GO:0034774,GO:0005543,GO:0060326,GO:0043312,GO:0006911,GO:0097320,GO:0071800	cell cortex|cell junction|cell projection|extracellular region|ficolin-1-rich granule lumen|phagocytic cup|plasma membrane|podosome|secretory granule lumen|phospholipid binding|cell chemotaxis|neutrophil degranulation|phagocytosis, engulfment|plasma membrane tubulation|podosome assembly
BIRC5	0	1	1	1	baculoviral IAP repeat-containing protein 5 isoform X1 [Canis lupus familiaris]	GO:0005814,GO:0032133,GO:0000775,GO:0000777,GO:0005737,GO:0005881,GO:0005829,GO:0031021,GO:0030496,GO:0005634,GO:0005876,GO:0048037,GO:0043027,GO:0008017,GO:0042803,GO:0015631,GO:0008270,GO:0051301,GO:0007059,GO:0051303,GO:0000086,GO:0000226,GO:0000281,GO:0007094,GO:0043066,GO:0043154,GO:0043524,GO:0045892,GO:0031536,GO:0045931,GO:0006468,GO:0031503,GO:0061178,GO:0061469	centriole|chromosome passenger complex|chromosome, centromeric region|condensed chromosome kinetochore|cytoplasm|cytoplasmic microtubule|cytosol|interphase microtubule organizing center|midbody|nucleus|spindle microtubule|cofactor binding|cysteine-type endopeptidase inhibitor activity involved in apoptotic process|microtubule binding|protein homodimerization activity|tubulin binding|zinc ion bind…	bom01524,bom04210,bom04215,bom04390,bom05161,bom05200,bom05207,bom05210	Platinum drug resistance|Apoptosis|Apoptosis - multiple species|Hippo signaling pathway|Hepatitis B|Pathways in cancer|Chemical carcinogenesis - receptor activation|Colorectal cancer
BLNK	0	1	1	1	PREDICTED: B-cell linker protein [Bos mutus]			bom04064,bom04380,bom04662,bom05169,bom05340	NF-kappa B signaling pathway|Osteoclast differentiation|B cell receptor signaling pathway|Epstein-Barr virus infection|Primary immunodeficiency
BLVRB	1	1	1	1	hypothetical protein [Bos mutus]	GO:0005829,GO:0005654,GO:0005886,GO:0004074,GO:0042602,GO:0042167	cytosol|nucleoplasm|plasma membrane|biliverdin reductase activity|riboflavin reductase (NADPH) activity|heme catabolic process	bom00740,bom00860	Riboflavin metabolism|Porphyrin and chlorophyll metabolism
BMP1	1	0	0	0	PREDICTED: bone morphogenetic protein 1 [Bos mutus]	GO:0005576,GO:0005615,GO:0005794,GO:0031982,GO:0005509,GO:0005125,GO:0008083,GO:0042802,GO:0004222,GO:0008237,GO:0008233,GO:0004252,GO:0008270,GO:0001502,GO:0030154,GO:0022617,GO:0034380,GO:0007275,GO:0001503,GO:0061036,GO:0006508,GO:0001501	extracellular region|extracellular space|Golgi apparatus|vesicle|calcium ion binding|cytokine activity|growth factor activity|identical protein binding|metalloendopeptidase activity|metallopeptidase activity|peptidase activity|serine-type endopeptidase activity|zinc ion binding|cartilage condensation|cell differentiation|extracellular matrix disassembly|high-density lipoprotein particle assembly|…
BMP2	0	1	0	0	Bone morphogenetic protein 2 [Eschrichtius robustus]	GO:0005615,GO:0005125,GO:0008083,GO:0051216,GO:0030154,GO:0001503,GO:0010862,GO:0060395	extracellular space|cytokine activity|growth factor activity|cartilage development|cell differentiation|ossification|positive regulation of pathway-restricted SMAD protein phosphorylation|SMAD protein signal transduction	bom04060,bom04350,bom04390,bom05200,bom05217	Cytokine-cytokine receptor interaction|TGF-beta signaling pathway|Hippo signaling pathway|Pathways in cancer|Basal cell carcinoma
BMP2K	0	1	1	0	PREDICTED: LOW QUALITY PROTEIN: BMP-2-inducible protein kinase [Bos mutus]	GO:0016607,GO:0005634,GO:0005524,GO:0019208,GO:0004674,GO:0006468,GO:0030500,GO:0030100	nuclear speck|nucleus|ATP binding|phosphatase regulator activity|protein serine/threonine kinase activity|protein phosphorylation|regulation of bone mineralization|regulation of endocytosis	bom05202	Transcriptional misregulation in cancer
BMP3	0	0	0	1	PREDICTED: bone morphogenetic protein 3 [Bos mutus]	GO:0005615,GO:0070700,GO:0005125,GO:0008083,GO:0005160,GO:0051216,GO:0048468,GO:0001649,GO:0010862,GO:0042981,GO:0043408,GO:0060395	extracellular space|BMP receptor binding|cytokine activity|growth factor activity|transforming growth factor beta receptor binding|cartilage development|cell development|osteoblast differentiation|positive regulation of pathway-restricted SMAD protein phosphorylation|regulation of apoptotic process|regulation of MAPK cascade|SMAD protein signal transduction	bom04060	Cytokine-cytokine receptor interaction
BMP4	1	1	0	0	bone morphogenetic protein 4, isoform CRA_b, partial [Mus musculus]	GO:0005615,GO:0070700,GO:0042056,GO:0039706,GO:0005125,GO:0008083,GO:0008201,GO:0005160,GO:0000186,GO:0009948,GO:0003180,GO:0002043,GO:0030509,GO:0061312,GO:0003130,GO:0071893,GO:0061151,GO:0061149,GO:0060442,GO:0001658,GO:0048754,GO:0060433,GO:0060503,GO:0060449,GO:0055007,GO:0048468,GO:0002062,GO:0060197,GO:0007182,GO:0060976,GO:0060363,GO:0035993,GO:0021904,GO:0048701,GO:0042733,GO:0035116,GO:…	extracellular space|BMP receptor binding|chemoattractant activity|co-receptor binding|cytokine activity|growth factor activity|heparin binding|transforming growth factor beta receptor binding|activation of MAPKK activity|anterior/posterior axis specification|aortic valve morphogenesis|blood vessel endothelial cell proliferation involved in sprouting angiogenesis|BMP signaling pathway|BMP signalin…	bom04060,bom04350,bom04390,bom04550,bom04919,bom05200,bom05217,bom05418	Cytokine-cytokine receptor interaction|TGF-beta signaling pathway|Hippo signaling pathway|Signaling pathways regulating pluripotency of stem cells|Thyroid hormone signaling pathway|Pathways in cancer|Basal cell carcinoma|Fluid shear stress and atherosclerosis
BMP5	1	0	0	0	bone morphogenetic protein 5 precursor [Bos taurus]			bom04060,bom04350,bom04390	Cytokine-cytokine receptor interaction|TGF-beta signaling pathway|Hippo signaling pathway
BNC2	0	0	0	1	zinc finger protein basonuclin-2 isoform X11 [Bos taurus]	GO:0005654,GO:0005634,GO:0003677,GO:0046872,GO:0003416,GO:0060485,GO:0060021,GO:0043586	nucleoplasm|nucleus|DNA binding|metal ion binding|endochondral bone growth|mesenchyme development|roof of mouth development|tongue development
BNIP3	0	1	0	1	PREDICTED: BCL2/adenovirus E1B 19 kDa protein-interacting protein 3 [Bos mutus]	GO:0005783,GO:0016021,GO:0005741,GO:0005739,GO:0005635,GO:0097345,GO:0035694,GO:0043065,GO:0043068	endoplasmic reticulum|integral component of membrane|mitochondrial outer membrane|mitochondrion|nuclear envelope|mitochondrial outer membrane permeabilization|mitochondrial protein catabolic process|positive regulation of apoptotic process|positive regulation of programmed cell death
BNIPL	0	1	0	0	PREDICTED: bcl-2/adenovirus E1B 19 kDa-interacting protein 2-like protein [Bos mutus]	GO:0005737,GO:0005829,GO:0005634,GO:0004309,GO:0042802,GO:0006915,GO:0008285,GO:0006798,GO:0040009	cytoplasm|cytosol|nucleus|exopolyphosphatase activity|identical protein binding|apoptotic process|negative regulation of cell proliferation|polyphosphate catabolic process|regulation of growth rate
BOC	0	1	0	0	PREDICTED: brother of CDO isoform X1 [Bos mutus]	GO:0044295,GO:0005887,GO:0005654,GO:0005886,GO:0007411,GO:0007155,GO:0051149,GO:0045663,GO:0007224	axonal growth cone|integral component of plasma membrane|nucleoplasm|plasma membrane|axon guidance|cell adhesion|positive regulation of muscle cell differentiation|positive regulation of myoblast differentiation|smoothened signaling pathway	bom04340,bom04360	Hedgehog signaling pathway|Axon guidance
BRCA1	0	1	0	1	PREDICTED: breast cancer type 1 susceptibility protein isoform X1 [Bos mutus]	GO:0070531,GO:0031436,GO:0005694,GO:0005737,GO:0005634,GO:0005886,GO:0003677,GO:0070063,GO:0003713,GO:0004842,GO:0008270,GO:0007049,GO:0043009,GO:0009048,GO:0000724,GO:0006633,GO:0045717,GO:0035067,GO:0071158,GO:0035066,GO:0045944,GO:0045893,GO:0051865,GO:0085020,GO:0006357	BRCA1-A complex|BRCA1-BARD1 complex|chromosome|cytoplasm|nucleus|plasma membrane|DNA binding|RNA polymerase binding|transcription coactivator activity|ubiquitin-protein transferase activity|zinc ion binding|cell cycle|chordate embryonic development|dosage compensation by inactivation of X chromosome|double-strand break repair via homologous recombination|fatty acid biosynthetic process|negative r…	bom01524,bom03440,bom03460,bom04120,bom04151,bom05206,bom05224	Platinum drug resistance|Homologous recombination|Fanconi anemia pathway|Ubiquitin mediated proteolysis|PI3K-Akt signaling pathway|MicroRNAs in cancer|Breast cancer
BRCA2	0	0	1	0	PREDICTED: LOW QUALITY PROTEIN: breast cancer type 2 susceptibility protein [Bos mutus]			bom03440,bom03460,bom05200,bom05212,bom05224	Homologous recombination|Fanconi anemia pathway|Pathways in cancer|Pancreatic cancer|Breast cancer
BRI3BP	1	1	0	0	BRI3-binding protein, partial [Bos mutus]	GO:0016021,GO:0005741,GO:0005739	integral component of membrane|mitochondrial outer membrane|mitochondrion
BRINP2	0	1	0	0	PREDICTED: BMP/retinoic acid-inducible neural-specific protein 2 [Bos mutus]	GO:0030425,GO:0005783,GO:0005576,GO:0043025,GO:0007050,GO:0071300,GO:0045930,GO:0045666	dendrite|endoplasmic reticulum|extracellular region|neuronal cell body|cell cycle arrest|cellular response to retinoic acid|negative regulation of mitotic cell cycle|positive regulation of neuron differentiation
BRIP1	1	0	0	0	PREDICTED: LOW QUALITY PROTEIN: Fanconi anemia group J protein [Bos mutus]			bom03440,bom03460	Homologous recombination|Fanconi anemia pathway
BRIX1	0	0	1	1	Ribosome biogenesis protein BRX1-like protein, partial [Bos mutus]	GO:0005730,GO:0000027	nucleolus|ribosomal large subunit assembly
BRSK1	0	1	0	0	PREDICTED: serine/threonine-protein kinase BRSK1 [Bos mutus]	GO:0030054,GO:0005813,GO:0005737,GO:0150034,GO:0005654,GO:0005634,GO:0048786,GO:0008021,GO:0005524,GO:0043015,GO:0000287,GO:0019901,GO:0004674,GO:0050321,GO:0008306,GO:0007409,GO:0006974,GO:0051298,GO:0030010,GO:0035556,GO:0090176,GO:0007095,GO:0030182,GO:0007269,GO:0006468,GO:0050770,GO:0010975,GO:0048167,GO:2000807,GO:0009411,GO:0099504	cell junction|centrosome|cytoplasm|distal axon|nucleoplasm|nucleus|presynaptic active zone|synaptic vesicle|ATP binding|gamma-tubulin binding|magnesium ion binding|protein kinase binding|protein serine/threonine kinase activity|tau-protein kinase activity|associative learning|axonogenesis|cellular response to DNA damage stimulus|centrosome duplication|establishment of cell polarity|intracellular …
BRSK2	0	1	0	0	PREDICTED: serine/threonine-protein kinase BRSK2 [Bos mutus]	GO:0005813,GO:0005737,GO:0150034,GO:0005783,GO:0005634,GO:0048471,GO:0005524,GO:0051117,GO:0000287,GO:0019901,GO:0004674,GO:0050321,GO:0031532,GO:0007409,GO:0051301,GO:0036503,GO:0030010,GO:0006887,GO:0000086,GO:0035556,GO:0070059,GO:0090176,GO:0030182,GO:0048812,GO:0018105,GO:0006468,GO:0050770,GO:0061178,GO:0010975	centrosome|cytoplasm|distal axon|endoplasmic reticulum|nucleus|perinuclear region of cytoplasm|ATP binding|ATPase binding|magnesium ion binding|protein kinase binding|protein serine/threonine kinase activity|tau-protein kinase activity|actin cytoskeleton reorganization|axonogenesis|cell division|ERAD pathway|establishment of cell polarity|exocytosis|G2/M transition of mitotic cell cycle|intracell…
BSG	1	1	1	1	PREDICTED: basigin [Bos mutus]	GO:0005887,GO:0042470,GO:0005537,GO:0072659	integral component of plasma membrane|melanosome|mannose binding|protein localization to plasma membrane
BSPRY	0	1	1	0	PREDICTED: B box and SPRY domain-containing protein [Bos mutus]	GO:0031252,GO:0016020,GO:0048471,GO:0008270,GO:0006816,GO:1990830	cell leading edge|membrane|perinuclear region of cytoplasm|zinc ion binding|calcium ion transport|cellular response to leukemia inhibitory factor
BST2	0	1	0	0	PREDICTED: bone marrow stromal antigen 2 [Bos mutus]	GO:0031225,GO:0016324,GO:0009986,GO:0005794,GO:0016021,GO:0005622,GO:0005770,GO:0045121,GO:0005886,GO:0008191,GO:0051607,GO:0045087,GO:0030308,GO:0030336,GO:1901253,GO:0002737,GO:0045071,GO:0032956,GO:0035455,GO:0035456,GO:0034341,GO:0009615	anchored component of membrane|apical plasma membrane|cell surface|Golgi apparatus|integral component of membrane|intracellular|late endosome|membrane raft|plasma membrane|metalloendopeptidase inhibitor activity|defense response to virus|innate immune response|negative regulation of cell growth|negative regulation of cell migration|negative regulation of intracellular transport of viral material|…	bom05168,bom05170	Herpes simplex virus 1 infection|Human immunodeficiency virus 1 infection
BTC	0	0	0	1	probetacellulin precursor [Bos taurus]	GO:0005615,GO:0016021,GO:0005886,GO:0005154,GO:0008083,GO:0007173,GO:0051781,GO:0008284	extracellular space|integral component of membrane|plasma membrane|epidermal growth factor receptor binding|growth factor activity|epidermal growth factor receptor signaling pathway|positive regulation of cell division|positive regulation of cell proliferation	bom04012	ErbB signaling pathway
BTG3	0	0	0	1	hypothetical protein [Bos mutus]	GO:0005737,GO:0005634,GO:0008285,GO:0045930	cytoplasm|nucleus|negative regulation of cell proliferation|negative regulation of mitotic cell cycle	bom03018	RNA degradation
BUB1	0	1	1	1	PREDICTED: LOW QUALITY PROTEIN: mitotic checkpoint serine/threonine-protein kinase BUB1 [Bos mutus]			bom04110,bom04114,bom04914	Cell cycle|Oocyte meiosis|Progesterone-mediated oocyte maturation
BUB1B	0	1	1	1	Mitotic checkpoint serine/threonine-protein kinase BUB1 beta, partial [Bos mutus]			bom04110,bom05166	Cell cycle|Human T-cell leukemia virus 1 infection
BYSL	0	0	0	1	bystin [Bos taurus]	GO:0045177,GO:0005737,GO:0005730,GO:0005634,GO:0030688,GO:0030515,GO:0008283,GO:0000462,GO:0006364,GO:0001829	apical part of cell|cytoplasm|nucleolus|nucleus|preribosome, small subunit precursor|snoRNA binding|cell proliferation|maturation of SSU-rRNA from tricistronic rRNA transcript (SSU-rRNA, 5.8S rRNA, LSU-rRNA)|rRNA processing|trophectodermal cell differentiation
C1QA	0	1	0	0	PREDICTED: complement C1q subcomponent subunit A [Bos mutus]	GO:0005581,GO:0005576,GO:0006958,GO:0045087	collagen trimer|extracellular region|complement activation, classical pathway|innate immune response	bom04610,bom05020,bom05133,bom05142,bom05150,bom05171,bom05322	Complement and coagulation cascades|Prion disease|Pertussis|Chagas disease|Staphylococcus aureus infection|Coronavirus disease - COVID-19|Systemic lupus erythematosus
C1QB	0	1	0	0	complement C1q subcomponent subunit C [Ovis aries]	GO:0005581,GO:0005576,GO:0042803,GO:0006958,GO:0045087,GO:0048839	collagen trimer|extracellular region|protein homodimerization activity|complement activation, classical pathway|innate immune response|inner ear development	bom04610,bom05020,bom05133,bom05142,bom05150,bom05171,bom05322	Complement and coagulation cascades|Prion disease|Pertussis|Chagas disease|Staphylococcus aureus infection|Coronavirus disease - COVID-19|Systemic lupus erythematosus
C1QC	0	1	0	0	C1QC protein, partial [Bos taurus]	GO:0005581,GO:0005615,GO:0006958,GO:0045087,GO:0030853,GO:0045650	collagen trimer|extracellular space|complement activation, classical pathway|innate immune response|negative regulation of granulocyte differentiation|negative regulation of macrophage differentiation	bom04610,bom05020,bom05133,bom05142,bom05150,bom05171,bom05322	Complement and coagulation cascades|Prion disease|Pertussis|Chagas disease|Staphylococcus aureus infection|Coronavirus disease - COVID-19|Systemic lupus erythematosus
C1QTNF3	0	0	1	1	complement C1q tumor necrosis factor-related protein 3 isoform X1 [Vicugna pacos]	GO:0005623,GO:0005581,GO:0070062,GO:0016020,GO:0035356,GO:0045444,GO:0010629,GO:0045721,GO:0050728,GO:1900165,GO:0071638,GO:1901223,GO:0070165,GO:0050715,GO:0070206	cell|collagen trimer|extracellular exosome|membrane|cellular triglyceride homeostasis|fat cell differentiation|negative regulation of gene expression|negative regulation of gluconeogenesis|negative regulation of inflammatory response|negative regulation of interleukin-6 secretion|negative regulation of monocyte chemotactic protein-1 production|negative regulation of NIK/NF-kappaB signaling|positi…
C1QTNF6	1	1	0	0	Complement C1q tumor necrosis factor-related protein 6, partial [Bos mutus]	GO:0005581,GO:0005615,GO:0042802,GO:0051259,GO:0070208	collagen trimer|extracellular space|identical protein binding|protein complex oligomerization|protein heterotrimerization
C2	1	1	0	0	TPA: complement component 2 precursor [Bos taurus]	GO:0005576,GO:0046872,GO:0004252,GO:0006958,GO:0045087	extracellular region|metal ion binding|serine-type endopeptidase activity|complement activation, classical pathway|innate immune response	bom04610,bom05133,bom05150,bom05171,bom05322	Complement and coagulation cascades|Pertussis|Staphylococcus aureus infection|Coronavirus disease - COVID-19|Systemic lupus erythematosus
C2CD2L	0	1	0	0	PREDICTED: C2 domain-containing protein 2-like [Bison bison bison]	GO:0032541,GO:0005789,GO:0016021,GO:0005886,GO:0043559,GO:0035091,GO:0008526,GO:0005548,GO:0035774	cortical endoplasmic reticulum|endoplasmic reticulum membrane|integral component of membrane|plasma membrane|insulin binding|phosphatidylinositol binding|phosphatidylinositol transporter activity|phospholipid transporter activity|positive regulation of insulin secretion involved in cellular response to glucose stimulus
C3AR1	1	1	1	1	PREDICTED: C3a anaphylatoxin chemotactic receptor [Bos mutus]			bom04080,bom04610,bom05150,bom05171	Neuroactive ligand-receptor interaction|Complement and coagulation cascades|Staphylococcus aureus infection|Coronavirus disease - COVID-19
C4BPA	1	0	0	0	PREDICTED: C4b-binding protein alpha chain isoform X2 [Bos mutus]	GO:0005576,GO:0006958,GO:0045087	extracellular region|complement activation, classical pathway|innate immune response	bom04610,bom05133	Complement and coagulation cascades|Pertussis
C5AR2	1	1	0	1	PREDICTED: C5a anaphylatoxin chemotactic receptor 2 [Bos mutus]	GO:0045177,GO:0009925,GO:0016021,GO:0005886,GO:0004878,GO:0004930,GO:0006935,GO:0002430,GO:0006954,GO:1900165,GO:0090024,GO:0032720,GO:0007200,GO:0007204,GO:0050679,GO:0070374,GO:0030449,GO:2000482	apical part of cell|basal plasma membrane|integral component of membrane|plasma membrane|complement component C5a receptor activity|G protein-coupled receptor activity|chemotaxis|complement receptor mediated signaling pathway|inflammatory response|negative regulation of interleukin-6 secretion|negative regulation of neutrophil chemotaxis|negative regulation of tumor necrosis factor production|pho…
CA10	1	1	0	0	carbonic anhydrase-related protein 10 precursor [Bos taurus]	GO:0004089,GO:0008270	carbonate dehydratase activity|zinc ion binding
CA12	1	1	0	1	PREDICTED: carbonic anhydrase 12 isoform X1 [Bos mutus]	GO:0016021,GO:0005886,GO:0004089,GO:0008270,GO:0015701,GO:0055064	integral component of membrane|plasma membrane|carbonate dehydratase activity|zinc ion binding|bicarbonate transport|chloride ion homeostasis	bom00910	Nitrogen metabolism
CA3	0	1	0	0	PREDICTED: carbonic anhydrase 3 [Bos mutus]	GO:0005829,GO:0004089,GO:0016151,GO:0008270,GO:0009617	cytosol|carbonate dehydratase activity|nickel cation binding|zinc ion binding|response to bacterium	bom00910	Nitrogen metabolism
CABLES1	0	1	0	0	PREDICTED: CDK5 and ABL1 enzyme substrate 1 [Capra hircus]	GO:0005829,GO:0005634,GO:0007049,GO:0051301,GO:0051726	cytosol|nucleus|cell cycle|cell division|regulation of cell cycle
CACFD1	1	1	0	0	PREDICTED: calcium channel flower homolog [Bos mutus]	GO:0016021,GO:0016192	integral component of membrane|vesicle-mediated transport
CACNA1B	1	1	0	0	PREDICTED: voltage-dependent N-type calcium channel subunit alpha-1B, partial [Bos mutus]	GO:0030425,GO:0043025,GO:0005886,GO:0098793,GO:0005891,GO:0005524,GO:0005262,GO:0005509,GO:0008331,GO:0008022,GO:0005245,GO:0070509,GO:0006816,GO:0007268,GO:0007626,GO:0051899,GO:0007269,GO:0008217,GO:0051924,GO:0008016,GO:0034765,GO:0048265	dendrite|neuronal cell body|plasma membrane|presynapse|voltage-gated calcium channel complex|ATP binding|calcium channel activity|calcium ion binding|high voltage-gated calcium channel activity|protein C-terminus binding|voltage-gated calcium channel activity|calcium ion import|calcium ion transport|chemical synaptic transmission|locomotory behavior|membrane depolarization|neurotransmitter secret…	bom04010,bom04020,bom04721,bom04723,bom04725,bom04726,bom04727,bom04728,bom04930,bom05016,bom05020,bom05022,bom05032,bom05033,bom05207	MAPK signaling pathway|Calcium signaling pathway|Synaptic vesicle cycle|Retrograde endocannabinoid signaling|Cholinergic synapse|Serotonergic synapse|GABAergic synapse|Dopaminergic synapse|Type II diabetes mellitus|Huntington disease|Prion disease|Pathways of neurodegeneration - multiple diseases|Morphine addiction|Nicotine addiction|Chemical carcinogenesis - receptor activation
CACNA1D	0	1	0	0	Voltage-dependent L-type calcium channel subunit alpha-1D, partial [Bos mutus]	GO:0016324,GO:0009986,GO:0098683,GO:0030425,GO:0032590,GO:0005887,GO:0099059,GO:1990454,GO:0043025,GO:0005634,GO:0005886,GO:0042383,GO:0005891,GO:0030018,GO:0051393,GO:0030506,GO:0005262,GO:0008331,GO:0046872,GO:0030165,GO:0005245,GO:0099635,GO:0086059,GO:0007188,GO:0070509,GO:0070588,GO:0006816,GO:0019722,GO:0061337,GO:0086002,GO:0070838,GO:0086046,GO:0051928,GO:0032793,GO:0035774,GO:0060372,GO:…	apical plasma membrane|cell surface|cochlear hair cell ribbon synapse|dendrite|dendrite membrane|integral component of plasma membrane|integral component of presynaptic active zone membrane|L-type voltage-gated calcium channel complex|neuronal cell body|nucleus|plasma membrane|sarcolemma|voltage-gated calcium channel complex|Z disc|alpha-actinin binding|ankyrin binding|calcium channel activity|hi…	bom04010,bom04020,bom04022,bom04024,bom04218,bom04260,bom04261,bom04270,bom04530,bom04713,bom04723,bom04724,bom04725,bom04726,bom04727,bom04728,bom04911,bom04912,bom04921,bom04924,bom04925,bom04927,bom04929,bom04930,bom04934,bom04935,bom04973,bom05010,bom05020,bom05022,bom05031,bom05207,bom05410,bom05412,bom05414	MAPK signaling pathway|Calcium signaling pathway|cGMP-PKG signaling pathway|cAMP signaling pathway|Cellular senescence|Cardiac muscle contraction|Adrenergic signaling in cardiomyocytes|Vascular smooth muscle contraction|Tight junction|Circadian entrainment|Retrograde endocannabinoid signaling|Glutamatergic synapse|Cholinergic synapse|Serotonergic synapse|GABAergic synapse|Dopaminergic synapse|Ins…
CACNA1G	1	1	0	1	PREDICTED: voltage-dependent T-type calcium channel subunit alpha-1G isoform X1 [Bos mutus]	GO:0005737,GO:0005886,GO:0005891,GO:0008332,GO:0097110,GO:0086056,GO:0086059,GO:0086016,GO:0086027,GO:0070509,GO:0070588,GO:0086002,GO:0007268,GO:0086010,GO:0086045,GO:0086046,GO:0019228,GO:0045956,GO:0060371,GO:0086091,GO:0034765,GO:0042391,GO:0010045,GO:0086015,GO:0086018	cytoplasm|plasma membrane|voltage-gated calcium channel complex|low voltage-gated calcium channel activity|scaffold protein binding|voltage-gated calcium channel activity involved in AV node cell action potential|voltage-gated calcium channel activity involved SA node cell action potential|AV node cell action potential|AV node cell to bundle of His cell signaling|calcium ion import|calcium ion tr…	bom04010,bom04020,bom04713,bom04925,bom04927,bom04929,bom04930,bom04934	MAPK signaling pathway|Calcium signaling pathway|Circadian entrainment|Aldosterone synthesis and secretion|Cortisol synthesis and secretion|GnRH secretion|Type II diabetes mellitus|Cushing syndrome
CACNA2D1	0	1	0	0	PREDICTED: voltage-dependent calcium channel subunit alpha-2/delta-1 [Bos mutus]	GO:0070062,GO:1990454,GO:0005886,GO:0016529,GO:0005891,GO:0046872,GO:0005245,GO:0098703,GO:0061577,GO:0006816,GO:0060402,GO:0086002,GO:1904646,GO:0086048,GO:1901843,GO:1902514,GO:0051924,GO:0086091,GO:0098903,GO:0060307	extracellular exosome|L-type voltage-gated calcium channel complex|plasma membrane|sarcoplasmic reticulum|voltage-gated calcium channel complex|metal ion binding|voltage-gated calcium channel activity|calcium ion import across plasma membrane|calcium ion transmembrane transport via high voltage-gated calcium channel|calcium ion transport|calcium ion transport into cytosol|cardiac muscle cell acti…	bom04010,bom04260,bom04261,bom04921,bom05410,bom05412,bom05414	MAPK signaling pathway|Cardiac muscle contraction|Adrenergic signaling in cardiomyocytes|Oxytocin signaling pathway|Hypertrophic cardiomyopathy|Arrhythmogenic right ventricular cardiomyopathy|Dilated cardiomyopathy
CACNG4	0	1	0	0	TPA: voltage-dependent calcium channel gamma-4 subunit-like [Bos taurus]	GO:0032281,GO:0044297,GO:0009986,GO:0098978,GO:0099061,GO:0005622,GO:1990454,GO:0014069,GO:0098839,GO:0036477,GO:0005246,GO:0016247,GO:0035255,GO:0005245,GO:0099590,GO:0098943,GO:2000969,GO:0051968,GO:0098970,GO:2000311,GO:0098962,GO:0042220,GO:0019226	AMPA glutamate receptor complex|cell body|cell surface|glutamatergic synapse|integral component of postsynaptic density membrane|intracellular|L-type voltage-gated calcium channel complex|postsynaptic density|postsynaptic density membrane|somatodendritic compartment|calcium channel regulator activity|channel regulator activity|ionotropic glutamate receptor binding|voltage-gated calcium channel ac…
CAD	1	1	0	1	PREDICTED: CAD protein isoform X1 [Bos mutus]			bom00240,bom00250	Pyrimidine metabolism|Alanine, aspartate and glutamate metabolism
CADM2	1	1	0	0	PREDICTED: cell adhesion molecule 2 isoform X1 [Bos mutus]	GO:0030424,GO:0030054,GO:0016021,GO:0005886,GO:0045202,GO:0034332,GO:0007155	axon|cell junction|integral component of membrane|plasma membrane|synapse|adherens junction organization|cell adhesion
CALB2	0	1	0	0	calretinin-like, partial [Lynx pardinus]	GO:0005829,GO:0030425,GO:0043005,GO:0005634,GO:0098793,GO:0045202,GO:0005509,GO:0051480,GO:1900271,GO:0099509	cytosol|dendrite|neuron projection|nucleus|presynapse|synapse|calcium ion binding|regulation of cytosolic calcium ion concentration|regulation of long-term synaptic potentiation|regulation of presynaptic cytosolic calcium ion concentration
CALCRL	1	1	0	0	PREDICTED: calcitonin gene-related peptide type 1 receptor [Bos mutus]	GO:0016021,GO:0005886,GO:0043235,GO:0001605,GO:0001635,GO:0004948,GO:0001525,GO:0007166,GO:0031623	integral component of membrane|plasma membrane|receptor complex|adrenomedullin receptor activity|calcitonin gene-related peptide receptor activity|calcitonin receptor activity|angiogenesis|cell surface receptor signaling pathway|receptor internalization	bom04080,bom04270	Neuroactive ligand-receptor interaction|Vascular smooth muscle contraction
CALHM2	1	1	0	0	PREDICTED: calcium homeostasis modulator protein 2 [Bos mutus]	GO:0005887,GO:0006811	integral component of plasma membrane|ion transport
CALY	0	1	0	0	PREDICTED: neuron-specific vesicular protein calcyon [Bos mutus]	GO:0031410,GO:0030659,GO:0005768,GO:0098978,GO:0005887,GO:0098843,GO:0038024,GO:0032051,GO:0050780,GO:0044877,GO:0048268,GO:0007212,GO:0016197,GO:0045807,GO:0098884	cytoplasmic vesicle|cytoplasmic vesicle membrane|endosome|glutamatergic synapse|integral component of plasma membrane|postsynaptic endocytic zone|cargo receptor activity|clathrin light chain binding|dopamine receptor binding|protein-containing complex binding|clathrin coat assembly|dopamine receptor signaling pathway|endosomal transport|positive regulation of endocytosis|postsynaptic neurotransmi…	bom04728	Dopaminergic synapse
CAMK2A	0	1	0	0	hypothetical protein DBR06_SOUSAS810210, partial [Sousa chinensis]	GO:0005954,GO:0030054,GO:0043197,GO:0014069,GO:0045211,GO:0005524,GO:0005516,GO:0004683,GO:0046872,GO:0004674,GO:0060996,GO:1990443,GO:2001222	calcium- and calmodulin-dependent protein kinase complex|cell junction|dendritic spine|postsynaptic density|postsynaptic membrane|ATP binding|calmodulin binding|calmodulin-dependent protein kinase activity|metal ion binding|protein serine/threonine kinase activity|dendritic spine development|peptidyl-threonine autophosphorylation|regulation of neuron migration	bom04012,bom04020,bom04024,bom04066,bom04114,bom04217,bom04261,bom04310,bom04360,bom04713,bom04720,bom04722,bom04725,bom04728,bom04740,bom04750,bom04911,bom04912,bom04916,bom04921,bom04922,bom04925,bom04934,bom04971,bom05012,bom05022,bom05031,bom05152,bom05200,bom05205,bom05214,bom05415,bom05417	ErbB signaling pathway|Calcium signaling pathway|cAMP signaling pathway|HIF-1 signaling pathway|Oocyte meiosis|Necroptosis|Adrenergic signaling in cardiomyocytes|Wnt signaling pathway|Axon guidance|Circadian entrainment|Long-term potentiation|Neurotrophin signaling pathway|Cholinergic synapse|Dopaminergic synapse|Olfactory transduction|Inflammatory mediator regulation of TRP channels|Insulin secr…
CAMK2G	0	0	0	1	PREDICTED: calcium/calmodulin-dependent protein kinase type II subunit gamma [Bos mutus]	GO:0005737,GO:0043005,GO:0014069,GO:0033017,GO:0005524,GO:0005516,GO:0004683,GO:0042802,GO:0042803,GO:0004674,GO:0006816,GO:0030154,GO:0000082,GO:0007399,GO:0046777,GO:0051259,GO:1903076,GO:1901897,GO:0001666,GO:0006979	cytoplasm|neuron projection|postsynaptic density|sarcoplasmic reticulum membrane|ATP binding|calmodulin binding|calmodulin-dependent protein kinase activity|identical protein binding|protein homodimerization activity|protein serine/threonine kinase activity|calcium ion transport|cell differentiation|G1/S transition of mitotic cell cycle|nervous system development|protein autophosphorylation|prote…	bom04012,bom04020,bom04024,bom04066,bom04114,bom04217,bom04261,bom04310,bom04360,bom04713,bom04720,bom04722,bom04725,bom04728,bom04740,bom04750,bom04911,bom04912,bom04916,bom04921,bom04922,bom04925,bom04934,bom04971,bom05012,bom05022,bom05031,bom05152,bom05200,bom05205,bom05214,bom05415,bom05417	ErbB signaling pathway|Calcium signaling pathway|cAMP signaling pathway|HIF-1 signaling pathway|Oocyte meiosis|Necroptosis|Adrenergic signaling in cardiomyocytes|Wnt signaling pathway|Axon guidance|Circadian entrainment|Long-term potentiation|Neurotrophin signaling pathway|Cholinergic synapse|Dopaminergic synapse|Olfactory transduction|Inflammatory mediator regulation of TRP channels|Insulin secr…
CAMK2N1	1	0	1	0	hypothetical protein DBR06_SOUSAS3910169, partial [Sousa chinensis]	GO:0030054,GO:0005622,GO:0043005,GO:0014069,GO:0045211,GO:0008427,GO:0019901,GO:0045786,GO:0008285,GO:1904030,GO:0070373,GO:0045861,GO:0010628	cell junction|intracellular|neuron projection|postsynaptic density|postsynaptic membrane|calcium-dependent protein kinase inhibitor activity|protein kinase binding|negative regulation of cell cycle|negative regulation of cell proliferation|negative regulation of cyclin-dependent protein kinase activity|negative regulation of ERK1 and ERK2 cascade|negative regulation of proteolysis|positive regula…
CAMKK1	0	1	1	0	PREDICTED: calcium/calmodulin-dependent protein kinase kinase 1 [Bos mutus]	GO:0005737,GO:0005829,GO:0005634,GO:0005524,GO:0005516,GO:0004683,GO:0004674,GO:0035556,GO:0045860	cytoplasm|cytosol|nucleus|ATP binding|calmodulin binding|calmodulin-dependent protein kinase activity|protein serine/threonine kinase activity|intracellular signal transduction|positive regulation of protein kinase activity	bom05034	Alcoholism
CAMSAP3	0	0	1	0	PREDICTED: LOW QUALITY PROTEIN: calmodulin-regulated spectrin-associated protein 3 [Bos mutus]	GO:0005737,GO:0036449,GO:0005915,GO:0051015,GO:0005516,GO:0051011,GO:0030507,GO:0031122,GO:0009792,GO:0090136,GO:0045198,GO:0030951,GO:0034453,GO:0000226,GO:0007026,GO:0010923,GO:0031175,GO:0098840,GO:0030334,GO:0051893,GO:1903358,GO:0070507,GO:0031113,GO:0033043,GO:0045218	cytoplasm|microtubule minus-end|zonula adherens|actin filament binding|calmodulin binding|microtubule minus-end binding|spectrin binding|cytoplasmic microtubule organization|embryo development ending in birth or egg hatching|epithelial cell-cell adhesion|establishment of epithelial cell apical/basal polarity|establishment or maintenance of microtubule cytoskeleton polarity|microtubule anchoring|m…
CAMTA1	0	1	0	0	calmodulin-binding transcription activator 1 isoform X11 [Bos indicus x Bos taurus]
CAPG	0	1	0	0	macrophage-capping protein [Bos taurus]	GO:0005814,GO:0005576,GO:0090543,GO:0042470,GO:0072686,GO:0005730,GO:0005654,GO:0051015,GO:0019904,GO:0051016	centriole|extracellular region|Flemming body|melanosome|mitotic spindle|nucleolus|nucleoplasm|actin filament binding|protein domain specific binding|barbed-end actin filament capping
CAPN11	1	1	0	0	PREDICTED: calpain-11 [Bos mutus]	GO:0001669,GO:0005737,GO:0005509,GO:0004198,GO:0008233,GO:0006508	acrosomal vesicle|cytoplasm|calcium ion binding|calcium-dependent cysteine-type endopeptidase activity|peptidase activity|proteolysis
CAPN14	1	1	0	1	PREDICTED: calpain-14 [Bos mutus]	GO:0005737,GO:0005509,GO:0004198,GO:0006508	cytoplasm|calcium ion binding|calcium-dependent cysteine-type endopeptidase activity|proteolysis
CAPN15	1	1	1	1	PREDICTED: calpain-15 [Bos mutus]	GO:0005737,GO:0004198,GO:0046872,GO:0006508	cytoplasm|calcium-dependent cysteine-type endopeptidase activity|metal ion binding|proteolysis
CAPN6	1	1	0	0	calpain-6 [Bos taurus]
CARD14	0	1	1	1	PREDICTED: caspase recruitment domain-containing protein 14 [Bos mutus]			bom04064	NF-kappa B signaling pathway
CARD19	1	1	1	1	caspase recruitment domain-containing protein 19 [Bos taurus]	GO:0005789,GO:0016021,GO:0031966	endoplasmic reticulum membrane|integral component of membrane|mitochondrial membrane
CARNMT1	0	1	0	0	PREDICTED: carnosine N-methyltransferase [Equus asinus]	GO:0005829,GO:0005634,GO:0030735,GO:0008757,GO:0035498,GO:0006548	cytosol|nucleus|carnosine N-methyltransferase activity|S-adenosylmethionine-dependent methyltransferase activity|carnosine metabolic process|histidine catabolic process	bom00340	Histidine metabolism
CARNS1	0	0	1	0	Carnosine synthase 1, partial [Bos mutus]	GO:0005829,GO:0005524,GO:0016887,GO:0047730,GO:0010181,GO:0102102,GO:0046872,GO:0035499,GO:0006548	cytosol|ATP binding|ATPase activity|carnosine synthase activity|FMN binding|homocarnosine synthase activity|metal ion binding|carnosine biosynthetic process|histidine catabolic process	bom00330,bom00340,bom00410	Arginine and proline metabolism|Histidine metabolism|beta-Alanine metabolism
CASC5	0	1	1	1	PREDICTED: LOW QUALITY PROTEIN: protein CASC5 [Bos mutus]
CASP1	1	0	0	0	PREDICTED: caspase-1 [Bos mutus]	GO:0005737,GO:0005789,GO:0005576,GO:0061702,GO:0005739,GO:0004197,GO:0097199,GO:0006919,GO:0006915,GO:0006954,GO:0045087	cytoplasm|endoplasmic reticulum membrane|extracellular region|inflammasome complex|mitochondrion|cysteine-type endopeptidase activity|cysteine-type endopeptidase activity involved in apoptotic signaling pathway|activation of cysteine-type endopeptidase activity involved in apoptotic process|apoptotic process|inflammatory response|innate immune response	bom04613,bom04621,bom05132	Neutrophil extracellular trap formation|NOD-like receptor signaling pathway|Salmonella infection
CASP3	1	1	0	1	PREDICTED: LOW QUALITY PROTEIN: caspase-3 [Bos mutus]	GO:0005737,GO:0097153,GO:0097199,GO:0006915,GO:0030218,GO:0030216,GO:0030182	cytoplasm|cysteine-type endopeptidase activity involved in apoptotic process|cysteine-type endopeptidase activity involved in apoptotic signaling pathway|apoptotic process|erythrocyte differentiation|keratinocyte differentiation|neuron differentiation	bom01524,bom04010,bom04115,bom04210,bom04215,bom04650,bom04657,bom04668,bom04726,bom04932,bom04933,bom05010,bom05012,bom05014,bom05016,bom05020,bom05022,bom05132,bom05133,bom05134,bom05145,bom05146,bom05152,bom05160,bom05161,bom05162,bom05163,bom05164,bom05165,bom05167,bom05168,bom05169,bom05170,bom05200,bom05203,bom05205,bom05206,bom05210,bom05222,bom05416,bom05417	Platinum drug resistance|MAPK signaling pathway|p53 signaling pathway|Apoptosis|Apoptosis - multiple species|Natural killer cell mediated cytotoxicity|IL-17 signaling pathway|TNF signaling pathway|Serotonergic synapse|Non-alcoholic fatty liver disease|AGE-RAGE signaling pathway in diabetic complications|Alzheimer disease|Parkinson disease|Amyotrophic lateral sclerosis|Huntington disease|Prion dis…
CASR	0	1	0	0	PREDICTED: extracellular calcium-sensing receptor [Bos mutus]	GO:0043679,GO:0005887,GO:0005622,GO:0016597,GO:0005509,GO:0004930,GO:0042803,GO:0006816,GO:0006874,GO:0005513,GO:0007186,GO:0007254,GO:0001503,GO:0008284,GO:0051924,GO:0042311	axon terminus|integral component of plasma membrane|intracellular|amino acid binding|calcium ion binding|G protein-coupled receptor activity|protein homodimerization activity|calcium ion transport|cellular calcium ion homeostasis|detection of calcium ion|G protein-coupled receptor signaling pathway|JNK cascade|ossification|positive regulation of cell proliferation|regulation of calcium ion transp…	bom04621,bom04928	NOD-like receptor signaling pathway|Parathyroid hormone synthesis, secretion and action
CASS4	1	1	1	1	PREDICTED: cas scaffolding protein family member 4 [Bos mutus]	GO:0005737,GO:0005856,GO:0005925,GO:0090527,GO:0007155,GO:0016477,GO:0030335,GO:0061098,GO:1900026	cytoplasm|cytoskeleton|focal adhesion|actin filament reorganization|cell adhesion|cell migration|positive regulation of cell migration|positive regulation of protein tyrosine kinase activity|positive regulation of substrate adhesion-dependent cell spreading
CAV3	1	1	0	0	caveolin-3 [Camelus ferus]	GO:0005901,GO:0016010,GO:0005783,GO:0000139,GO:0005887,GO:0042383,GO:0030315,GO:0043014,GO:0005246,GO:0071253,GO:0044325,GO:0008022,GO:0044877,GO:0032947,GO:0017080,GO:0005198,GO:0007015,GO:0055013,GO:0070836,GO:0030154,GO:0042632,GO:0031122,GO:0035995,GO:0042593,GO:0060347,GO:0046716,GO:0007520,GO:0051926,GO:0010614,GO:0045792,GO:0043407,GO:1900826,GO:0051001,GO:0060299,GO:0051647,GO:0001778,GO:…	caveola|dystrophin-associated glycoprotein complex|endoplasmic reticulum|Golgi membrane|integral component of plasma membrane|sarcolemma|T-tubule|alpha-tubulin binding|calcium channel regulator activity|connexin binding|ion channel binding|protein C-terminus binding|protein-containing complex binding|protein-containing complex scaffold activity|sodium channel regulator activity|structural molecul…	bom04144,bom04510,bom05020,bom05100,bom05205,bom05418	Endocytosis|Focal adhesion|Prion disease|Bacterial invasion of epithelial cells|Proteoglycans in cancer|Fluid shear stress and atherosclerosis
CBFA2T3	0	1	0	0	PREDICTED: protein CBFA2T3 isoform X1 [Bos mutus]
CBLN4	0	1	0	0	PREDICTED: cerebellin-4, partial [Bos indicus]	GO:0030054,GO:0005615,GO:0045202,GO:0009306	cell junction|extracellular space|synapse|protein secretion
CBR4	1	1	1	1	carbonyl reductase family member 4 [Bos taurus]	GO:0005759,GO:1990204,GO:0047025,GO:0003955,GO:0070402,GO:0008753,GO:0048038,GO:0044597,GO:0044598,GO:0006633,GO:0055114,GO:0051290,GO:0051289	mitochondrial matrix|oxidoreductase complex|3-oxoacyl-[acyl-carrier-protein] reductase (NADH) activity|NAD(P)H dehydrogenase (quinone) activity|NADPH binding|NADPH dehydrogenase (quinone) activity|quinone binding|daunorubicin metabolic process|doxorubicin metabolic process|fatty acid biosynthetic process|oxidation-reduction process|protein heterotetramerization|protein homotetramerization	bom00061	Fatty acid biosynthesis
CC2D1B	0	1	0	0	PREDICTED: coiled-coil and C2 domain-containing protein 1B [Bos mutus]	GO:0043231,GO:0005654,GO:0005634,GO:0001078,GO:0000978,GO:0000122	intracellular membrane-bounded organelle|nucleoplasm|nucleus|proximal promoter DNA-binding transcription repressor activity, RNA polymerase II-specific|RNA polymerase II proximal promoter sequence-specific DNA binding|negative regulation of transcription by RNA polymerase II
CCBL1	0	1	0	1	PREDICTED: kynurenine--oxoglutarate transaminase 1, partial [Bos mutus]	GO:0005829,GO:0005654,GO:0047804,GO:0047316,GO:0016212,GO:0047945,GO:0047312,GO:0042803,GO:0030170,GO:0008483,GO:0008652,GO:0006575,GO:0070189,GO:0097053,GO:0006559,GO:0006569	cytosol|nucleoplasm|cysteine-S-conjugate beta-lyase activity|glutamine-phenylpyruvate transaminase activity|kynurenine-oxoglutarate transaminase activity|L-glutamine:pyruvate aminotransferase activity|L-phenylalanine:pyruvate aminotransferase activity|protein homodimerization activity|pyridoxal phosphate binding|transaminase activity|cellular amino acid biosynthetic process|cellular modified amin…	bom00270,bom00380,bom00450	Cysteine and methionine metabolism|Tryptophan metabolism|Selenocompound metabolism
CCDC109B	1	0	0	0	Coiled-coil domain-containing protein 109B, partial [Bos mutus]	GO:0034704,GO:0031305,GO:0031224,GO:0005743,GO:0005739,GO:1990246,GO:0019855,GO:0036444,GO:0051560,GO:0006851	calcium channel complex|integral component of mitochondrial inner membrane|intrinsic component of membrane|mitochondrial inner membrane|mitochondrion|uniplex complex|calcium channel inhibitor activity|calcium import into the mitochondrion|mitochondrial calcium ion homeostasis|mitochondrial calcium ion transmembrane transport
CCDC14	0	1	0	0	PREDICTED: coiled-coil domain-containing protein 14 [Bos mutus]	GO:0034451,GO:0005813,GO:0071539,GO:0021762	centriolar satellite|centrosome|protein localization to centrosome|substantia nigra development
CCDC153	1	1	0	1	coiled-coil domain-containing protein 153 isoform X4 [Bos taurus]
CCDC158	0	1	0	0	PREDICTED: coiled-coil domain-containing protein 158 [Bos mutus]
CCDC160	0	1	0	0	Coiled-coil domain-containing protein 160, partial [Bos mutus]
CCDC187	1	1	0	0	PREDICTED: LOW QUALITY PROTEIN: uncharacterized protein CCDC187 [Bos mutus]	GO:0005813,GO:0008017,GO:0034453	centrosome|microtubule binding|microtubule anchoring
CCDC51	1	1	0	0	PREDICTED: coiled-coil domain-containing protein 51 isoform X1 [Bos mutus]
CCDC62	0	1	0	0	PREDICTED: LOW QUALITY PROTEIN: coiled-coil domain-containing protein 62 [Bos mutus]	GO:0005737,GO:0005654,GO:0005634,GO:0005886,GO:0030331,GO:0030374,GO:0001835,GO:0071392,GO:0045944	cytoplasm|nucleoplasm|nucleus|plasma membrane|estrogen receptor binding|nuclear receptor transcription coactivator activity|blastocyst hatching|cellular response to estradiol stimulus|positive regulation of transcription by RNA polymerase II
CCDC64B	0	0	1	0	PREDICTED: bicaudal D-related protein 2 [Bos mutus]	GO:0005737,GO:0017137,GO:0055107	cytoplasm|Rab GTPase binding|Golgi to secretory granule transport
CCDC71L	0	1	0	0	PREDICTED: coiled-coil domain-containing protein 71L [Bos mutus]	GO:0044255,GO:0045600	cellular lipid metabolic process|positive regulation of fat cell differentiation
CCDC78	1	0	0	0	PREDICTED: coiled-coil domain-containing protein 78 [Bos mutus]	GO:0005814,GO:0005737,GO:0098536,GO:0048471,GO:0042383,GO:0016529,GO:0030030,GO:0098535,GO:0003009	centriole|cytoplasm|deuterosome|perinuclear region of cytoplasm|sarcolemma|sarcoplasmic reticulum|cell projection organization|de novo centriole assembly involved in multi-ciliated epithelial cell differentiation|skeletal muscle contraction
CCDC80	0	0	0	1	Coiled-coil domain-containing protein 80, partial [Bos mutus]	GO:0005604,GO:0005614,GO:0001968,GO:0008201,GO:0030198,GO:0010811,GO:0009617	basement membrane|interstitial matrix|fibronectin binding|heparin binding|extracellular matrix organization|positive regulation of cell-substrate adhesion|response to bacterium
CCDC85C	0	1	0	0	PREDICTED: coiled-coil domain-containing protein 85C [Bos mutus]	GO:0043296,GO:0005923,GO:0021987	apical junction complex|bicellular tight junction|cerebral cortex development
CCDC88B	1	1	0	0	PREDICTED: coiled-coil domain-containing protein 88B [Bos mutus]	GO:0005813,GO:0005737,GO:0005783,GO:0005794,GO:0016020,GO:0051959,GO:0008017,GO:0031122,GO:0030705,GO:0042832,GO:0001819,GO:0050870,GO:0042102	centrosome|cytoplasm|endoplasmic reticulum|Golgi apparatus|membrane|dynein light intermediate chain binding|microtubule binding|cytoplasmic microtubule organization|cytoskeleton-dependent intracellular transport|defense response to protozoan|positive regulation of cytokine production|positive regulation of T cell activation|positive regulation of T cell proliferation
CCDC91	1	1	0	0	coiled-coil domain-containing protein 91 isoform X4 [Delphinapterus leucas]	GO:0005829,GO:0016020,GO:0005802,GO:0090160,GO:0015031	cytosol|membrane|trans-Golgi network|Golgi to lysosome transport|protein transport
CCL22	1	1	1	0	PREDICTED: C-C motif chemokine 22 [Bos mutus]			bom04060,bom04061,bom04062,bom04625	Cytokine-cytokine receptor interaction|Viral protein interaction with cytokine and cytokine receptor|Chemokine signaling pathway|C-type lectin receptor signaling pathway
CCL5	1	1	0	1	PREDICTED: C-C motif chemokine 5 [Bos mutus]	GO:0005737,GO:0005615,GO:0048020,GO:0031726,GO:0031729,GO:0031730,GO:0042056,GO:0008009,GO:0046817,GO:0004435,GO:0016004,GO:0042803,GO:0004672,GO:0043621,GO:0030298,GO:0031584,GO:0006816,GO:0007267,GO:0006874,GO:0044344,GO:0071346,GO:0071347,GO:0071407,GO:0071356,GO:0070098,GO:0048245,GO:0006887,GO:0007186,GO:0006954,GO:0007159,GO:0031663,GO:0048247,GO:0000165,GO:0002548,GO:0043922,GO:0045744,GO:…	cytoplasm|extracellular space|CCR chemokine receptor binding|CCR1 chemokine receptor binding|CCR4 chemokine receptor binding|CCR5 chemokine receptor binding|chemoattractant activity|chemokine activity|chemokine receptor antagonist activity|phosphatidylinositol phospholipase C activity|phospholipase activator activity|protein homodimerization activity|protein kinase activity|protein self-associati…	bom04060,bom04061,bom04062,bom04620,bom04621,bom04623,bom04668,bom05020,bom05142,bom05163,bom05164,bom05168,bom05323,bom05417	Cytokine-cytokine receptor interaction|Viral protein interaction with cytokine and cytokine receptor|Chemokine signaling pathway|Toll-like receptor signaling pathway|NOD-like receptor signaling pathway|Cytosolic DNA-sensing pathway|TNF signaling pathway|Prion disease|Chagas disease|Human cytomegalovirus infection|Influenza A|Herpes simplex virus 1 infection|Rheumatoid arthritis|Lipid and atherosc…
CCNA2	0	1	0	1	PREDICTED: cyclin-A2, partial [Bos mutus]	GO:0097124,GO:0000307,GO:0005737,GO:0005634,GO:0016538,GO:0019901,GO:0044843,GO:0051301,GO:0000086,GO:0000278,GO:0045787,GO:0008284,GO:0006468,GO:0000079,GO:0006275,GO:0007088	cyclin A2-CDK2 complex|cyclin-dependent protein kinase holoenzyme complex|cytoplasm|nucleus|cyclin-dependent protein serine/threonine kinase regulator activity|protein kinase binding|cell cycle G1/S phase transition|cell division|G2/M transition of mitotic cell cycle|mitotic cell cycle|positive regulation of cell cycle|positive regulation of cell proliferation|protein phosphorylation|regulation o…	bom04110,bom04152,bom04218,bom04914,bom05161,bom05165,bom05166,bom05169,bom05200,bom05202,bom05203,bom05221	Cell cycle|AMPK signaling pathway|Cellular senescence|Progesterone-mediated oocyte maturation|Hepatitis B|Human papillomavirus infection|Human T-cell leukemia virus 1 infection|Epstein-Barr virus infection|Pathways in cancer|Transcriptional misregulation in cancer|Viral carcinogenesis|Acute myeloid leukemia
CCNB1	1	1	1	1	G2/mitotic-specific cyclin-B1 [Bos taurus]	GO:0005813,GO:0000942,GO:0097125,GO:0000307,GO:0005737,GO:0005829,GO:0016020,GO:0005759,GO:0005634,GO:0000922,GO:0061575,GO:0016538,GO:0016301,GO:0005113,GO:0019901,GO:0044389,GO:0051301,GO:2000775,GO:0001701,GO:0000278,GO:0007080,GO:0007052,GO:0051987,GO:0045787,GO:0008284,GO:0048146,GO:0010971,GO:1905448,GO:0000079,GO:0090266,GO:0007088	centrosome|condensed nuclear chromosome outer kinetochore|cyclin B1-CDK1 complex|cyclin-dependent protein kinase holoenzyme complex|cytoplasm|cytosol|membrane|mitochondrial matrix|nucleus|spindle pole|cyclin-dependent protein serine/threonine kinase activator activity|cyclin-dependent protein serine/threonine kinase regulator activity|kinase activity|patched binding|protein kinase binding|ubiquit…	bom04068,bom04110,bom04114,bom04115,bom04218,bom04914,bom05170	FoxO signaling pathway|Cell cycle|Oocyte meiosis|p53 signaling pathway|Cellular senescence|Progesterone-mediated oocyte maturation|Human immunodeficiency virus 1 infection
CCNB2	0	1	1	1	PREDICTED: G2/mitotic-specific cyclin-B2 [Bos mutus]	GO:0005813,GO:0000307,GO:0005737,GO:0015630,GO:0005634,GO:0016538,GO:0019901,GO:0051301,GO:0000278,GO:0045787,GO:0008284,GO:0006468,GO:0000079,GO:0007088	centrosome|cyclin-dependent protein kinase holoenzyme complex|cytoplasm|microtubule cytoskeleton|nucleus|cyclin-dependent protein serine/threonine kinase regulator activity|protein kinase binding|cell division|mitotic cell cycle|positive regulation of cell cycle|positive regulation of cell proliferation|protein phosphorylation|regulation of cyclin-dependent protein serine/threonine kinase activit…	bom04068,bom04110,bom04114,bom04115,bom04218,bom04914,bom05166,bom05170	FoxO signaling pathway|Cell cycle|Oocyte meiosis|p53 signaling pathway|Cellular senescence|Progesterone-mediated oocyte maturation|Human T-cell leukemia virus 1 infection|Human immunodeficiency virus 1 infection
CCND3	0	1	0	0	hypothetical protein E2I00_010894, partial [Balaenoptera physalus]	GO:0000307,GO:0005737,GO:0016020,GO:0005634,GO:0016538,GO:0019901,GO:0051301,GO:0000278,GO:0045787,GO:0008284,GO:1900087,GO:0006468,GO:0000079,GO:0007088	cyclin-dependent protein kinase holoenzyme complex|cytoplasm|membrane|nucleus|cyclin-dependent protein serine/threonine kinase regulator activity|protein kinase binding|cell division|mitotic cell cycle|positive regulation of cell cycle|positive regulation of cell proliferation|positive regulation of G1/S transition of mitotic cell cycle|protein phosphorylation|regulation of cyclin-dependent prote…	bom04110,bom04115,bom04151,bom04218,bom04310,bom04390,bom04510,bom04630,bom05162,bom05164,bom05165,bom05166,bom05169,bom05200,bom05203,bom05207	Cell cycle|p53 signaling pathway|PI3K-Akt signaling pathway|Cellular senescence|Wnt signaling pathway|Hippo signaling pathway|Focal adhesion|JAK-STAT signaling pathway|Measles|Influenza A|Human papillomavirus infection|Human T-cell leukemia virus 1 infection|Epstein-Barr virus infection|Pathways in cancer|Viral carcinogenesis|Chemical carcinogenesis - receptor activation
CCNF	0	1	1	1	PREDICTED: cyclin-F [Bos mutus]	GO:0030054,GO:0005814,GO:0005813,GO:0000307,GO:0005737,GO:0005634,GO:0019005,GO:0016538,GO:0019901,GO:0051301,GO:0000278,GO:0010826,GO:0001890,GO:0045787,GO:0008284,GO:0006468,GO:0016567,GO:0000320,GO:0000079,GO:0007088,GO:0031146	cell junction|centriole|centrosome|cyclin-dependent protein kinase holoenzyme complex|cytoplasm|nucleus|SCF ubiquitin ligase complex|cyclin-dependent protein serine/threonine kinase regulator activity|protein kinase binding|cell division|mitotic cell cycle|negative regulation of centrosome duplication|placenta development|positive regulation of cell cycle|positive regulation of cell proliferation…
CCNG1	0	1	0	1	PREDICTED: cyclin-G1 [Bos mutus]	GO:0000307,GO:0005737,GO:0005634,GO:0016538,GO:0019901,GO:0051301,GO:0000278,GO:0045787,GO:0008284,GO:0006468,GO:0000079,GO:0007088	cyclin-dependent protein kinase holoenzyme complex|cytoplasm|nucleus|cyclin-dependent protein serine/threonine kinase regulator activity|protein kinase binding|cell division|mitotic cell cycle|positive regulation of cell cycle|positive regulation of cell proliferation|protein phosphorylation|regulation of cyclin-dependent protein serine/threonine kinase activity|regulation of mitotic nuclear divi…	bom04115,bom05206	p53 signaling pathway|MicroRNAs in cancer
CCNG2	0	0	0	1	hypothetical protein [Bos mutus]			bom04068,bom04115	FoxO signaling pathway|p53 signaling pathway
CCNJL	1	1	0	0	PREDICTED: cyclin-J-like protein [Bos mutus]	GO:0000307,GO:0005737,GO:0005634,GO:0016538,GO:0019901,GO:0000278,GO:0045787,GO:0008284,GO:0006468,GO:0000079,GO:0007088	cyclin-dependent protein kinase holoenzyme complex|cytoplasm|nucleus|cyclin-dependent protein serine/threonine kinase regulator activity|protein kinase binding|mitotic cell cycle|positive regulation of cell cycle|positive regulation of cell proliferation|protein phosphorylation|regulation of cyclin-dependent protein serine/threonine kinase activity|regulation of mitotic nuclear division
CCNL1	0	0	0	1	cyclin-L1 [Bos taurus]	GO:0000307,GO:0016607,GO:0005634,GO:0016538,GO:0045737,GO:1901409,GO:0045944,GO:0006396	cyclin-dependent protein kinase holoenzyme complex|nuclear speck|nucleus|cyclin-dependent protein serine/threonine kinase regulator activity|positive regulation of cyclin-dependent protein serine/threonine kinase activity|positive regulation of phosphorylation of RNA polymerase II C-terminal domain|positive regulation of transcription by RNA polymerase II|RNA processing
CCR4	1	1	0	0	PREDICTED: C-C chemokine receptor type 4 isoform X1 [Bos mutus]	GO:0009897,GO:0016021,GO:0005622,GO:0019957,GO:0016493,GO:0019956,GO:0019722,GO:0060326,GO:0006935,GO:0048872,GO:0006955,GO:0006954,GO:0001764,GO:0007204,GO:0002507	external side of plasma membrane|integral component of membrane|intracellular|C-C chemokine binding|C-C chemokine receptor activity|chemokine binding|calcium-mediated signaling|cell chemotaxis|chemotaxis|homeostasis of number of cells|immune response|inflammatory response|neuron migration|positive regulation of cytosolic calcium ion concentration|tolerance induction	bom04060,bom04061,bom04062,bom05167,bom05203	Cytokine-cytokine receptor interaction|Viral protein interaction with cytokine and cytokine receptor|Chemokine signaling pathway|Kaposi sarcoma-associated herpesvirus infection|Viral carcinogenesis
CCR7	1	1	1	0	C-C chemokine receptor type 7, partial [Bos mutus]	GO:0009897,GO:0016021,GO:0005622,GO:0019957,GO:0016493,GO:0038117,GO:0035757,GO:0035758,GO:0019956,GO:0019722,GO:0060326,GO:0006935,GO:0006955,GO:0006954,GO:0007204	external side of plasma membrane|integral component of membrane|intracellular|C-C chemokine binding|C-C chemokine receptor activity|C-C motif chemokine 19 receptor activity|chemokine (C-C motif) ligand 19 binding|chemokine (C-C motif) ligand 21 binding|chemokine binding|calcium-mediated signaling|cell chemotaxis|chemotaxis|immune response|inflammatory response|positive regulation of cytosolic cal…	bom04060,bom04061,bom04062	Cytokine-cytokine receptor interaction|Viral protein interaction with cytokine and cytokine receptor|Chemokine signaling pathway
CCSER2	0	1	0	1	PREDICTED: serine-rich coiled-coil domain-containing protein 2 isoform X2 [Bos mutus]	GO:0005737,GO:0015630,GO:0008017,GO:0001578	cytoplasm|microtubule cytoskeleton|microtubule binding|microtubule bundle formation
CD14	0	1	0	0	PREDICTED: monocyte differentiation antigen CD14 isoform X1 [Bos mutus]	GO:0031362,GO:0009986,GO:0009897,GO:0005576,GO:0005794,GO:0046696,GO:0045121,GO:0001530,GO:0071726,GO:0071222,GO:0071727,GO:0006954,GO:0045087,GO:0031663,GO:0050715,GO:0032729,GO:2000484,GO:1901224,GO:0032760,GO:0032481,GO:0009617,GO:0034142	anchored component of external side of plasma membrane|cell surface|external side of plasma membrane|extracellular region|Golgi apparatus|lipopolysaccharide receptor complex|membrane raft|lipopolysaccharide binding|cellular response to diacyl bacterial lipopeptide|cellular response to lipopolysaccharide|cellular response to triacyl bacterial lipopeptide|inflammatory response|innate immune respons…	bom04010,bom04064,bom04145,bom04620,bom04640,bom05132,bom05133,bom05134,bom05146,bom05152,bom05202,bom05221,bom05417	MAPK signaling pathway|NF-kappa B signaling pathway|Phagosome|Toll-like receptor signaling pathway|Hematopoietic cell lineage|Salmonella infection|Pertussis|Legionellosis|Amoebiasis|Tuberculosis|Transcriptional misregulation in cancer|Acute myeloid leukemia|Lipid and atherosclerosis
CD163	1	0	0	0	PREDICTED: scavenger receptor cysteine-rich type 1 protein M130 isoform X1 [Bos mutus]	GO:0009897,GO:0005576,GO:0016021,GO:0005044,GO:0006953	external side of plasma membrane|extracellular region|integral component of membrane|scavenger receptor activity|acute-phase response
CD1E	1	1	1	1	PREDICTED: T-cell surface glycoprotein CD1e, membrane-associated isoform X2 [Bos mutus]	GO:0009986,GO:0005769,GO:0000139,GO:0005887,GO:0005770,GO:0043202,GO:0005886,GO:0030883,GO:0030884,GO:0071723,GO:0002250,GO:0048006,GO:0048007,GO:0006955,GO:0001916	cell surface|early endosome|Golgi membrane|integral component of plasma membrane|late endosome|lysosomal lumen|plasma membrane|endogenous lipid antigen binding|exogenous lipid antigen binding|lipopeptide binding|adaptive immune response|antigen processing and presentation, endogenous lipid antigen via MHC class Ib|antigen processing and presentation, exogenous lipid antigen via MHC class Ib|immun…	bom04530,bom04640,bom05146	Tight junction|Hematopoietic cell lineage|Amoebiasis
CD2	1	1	0	0	PREDICTED: T-cell surface antigen CD2 [Bos mutus]			bom04514,bom04640	Cell adhesion molecules|Hematopoietic cell lineage
CD207	1	1	0	0	PREDICTED: C-type lectin domain family 4 member K [Bos mutus]
CD22	0	1	0	0	PREDICTED: B-cell receptor CD22 [Bos mutus]			bom04514,bom04640,bom04662	Cell adhesion molecules|Hematopoietic cell lineage|B cell receptor signaling pathway
CD27	0	1	0	0	PREDICTED: CD27 antigen isoform X1 [Bos mutus]			bom04060	Cytokine-cytokine receptor interaction
CD276	1	1	0	0	PREDICTED: CD276 antigen, partial [Bos mutus]	GO:0009897,GO:0016021,GO:0005102,GO:0008283,GO:0006955,GO:0045078,GO:0042102,GO:0050776,GO:0042110,GO:0050852	external side of plasma membrane|integral component of membrane|signaling receptor binding|cell proliferation|immune response|positive regulation of interferon-gamma biosynthetic process|positive regulation of T cell proliferation|regulation of immune response|T cell activation|T cell receptor signaling pathway	bom04514	Cell adhesion molecules
CD34	1	1	0	0	Hematopoietic progenitor cell antigen CD34 [Bos mutus]	GO:0016324,GO:0009925,GO:0005737,GO:0009897,GO:0036053,GO:0045171,GO:0005764,GO:0048471,GO:0005886,GO:0030246,GO:0008283,GO:0098609,GO:0003094,GO:0050900,GO:0035759,GO:0030195,GO:1900035,GO:1900038,GO:1901215,GO:0045019,GO:0032720,GO:0045766,GO:0032733,GO:0042482,GO:0071636,GO:2001214,GO:0008217,GO:0001894	apical plasma membrane|basal plasma membrane|cytoplasm|external side of plasma membrane|glomerular endothelium fenestra|intercellular bridge|lysosome|perinuclear region of cytoplasm|plasma membrane|carbohydrate binding|cell proliferation|cell-cell adhesion|glomerular filtration|leukocyte migration|mesangial cell-matrix adhesion|negative regulation of blood coagulation|negative regulation of cellu…	bom04514,bom04640	Cell adhesion molecules|Hematopoietic cell lineage
CD3D	1	1	1	1	PREDICTED: T-cell surface glycoprotein CD3 delta chain isoform X1 [Bos mutus]	GO:0042105,GO:0009897,GO:0016021,GO:0046982,GO:0042803,GO:0003713,GO:0004888,GO:0002250,GO:0007166,GO:0045944,GO:0045059,GO:0051260,GO:0030217	alpha-beta T cell receptor complex|external side of plasma membrane|integral component of membrane|protein heterodimerization activity|protein homodimerization activity|transcription coactivator activity|transmembrane signaling receptor activity|adaptive immune response|cell surface receptor signaling pathway|positive regulation of transcription by RNA polymerase II|positive thymic T cell selecti…	bom04640,bom04658,bom04659,bom04660,bom05142,bom05162,bom05166,bom05169,bom05170,bom05235,bom05340	Hematopoietic cell lineage|Th1 and Th2 cell differentiation|Th17 cell differentiation|T cell receptor signaling pathway|Chagas disease|Measles|Human T-cell leukemia virus 1 infection|Epstein-Barr virus infection|Human immunodeficiency virus 1 infection|PD-L1 expression and PD-1 checkpoint pathway in cancer|Primary immunodeficiency
CD3E	1	1	0	0	T-cell surface glycoprotein CD3 epsilon chain precursor [Bos taurus]	GO:0042105,GO:0044297,GO:0005911,GO:0043197,GO:0009897,GO:0001772,GO:0016021,GO:0046982,GO:0042803,GO:0017124,GO:0004888,GO:0002250,GO:0097190,GO:0007166,GO:0021549,GO:0016358,GO:0010629,GO:0045879,GO:0045060,GO:0046641,GO:0050850,GO:0033634,GO:0001954,GO:0010628,GO:0032729,GO:0045086,GO:0032753,GO:0050731,GO:0002669,GO:0045059,GO:0051260,GO:0031295,GO:0030217,GO:0050852	alpha-beta T cell receptor complex|cell body|cell-cell junction|dendritic spine|external side of plasma membrane|immunological synapse|integral component of membrane|protein heterodimerization activity|protein homodimerization activity|SH3 domain binding|transmembrane signaling receptor activity|adaptive immune response|apoptotic signaling pathway|cell surface receptor signaling pathway|cerebellu…	bom04640,bom04658,bom04659,bom04660,bom05142,bom05162,bom05166,bom05169,bom05170,bom05235,bom05340	Hematopoietic cell lineage|Th1 and Th2 cell differentiation|Th17 cell differentiation|T cell receptor signaling pathway|Chagas disease|Measles|Human T-cell leukemia virus 1 infection|Epstein-Barr virus infection|Human immunodeficiency virus 1 infection|PD-L1 expression and PD-1 checkpoint pathway in cancer|Primary immunodeficiency
CD3G	0	1	1	1	PREDICTED: T-cell surface glycoprotein CD3 gamma chain isoform X1 [Bos mutus]	GO:0042105,GO:0009897,GO:0016021,GO:0004888,GO:0002250,GO:0007166,GO:0045059,GO:0030217	alpha-beta T cell receptor complex|external side of plasma membrane|integral component of membrane|transmembrane signaling receptor activity|adaptive immune response|cell surface receptor signaling pathway|positive thymic T cell selection|T cell differentiation	bom04640,bom04658,bom04659,bom04660,bom05142,bom05162,bom05166,bom05169,bom05170,bom05235	Hematopoietic cell lineage|Th1 and Th2 cell differentiation|Th17 cell differentiation|T cell receptor signaling pathway|Chagas disease|Measles|Human T-cell leukemia virus 1 infection|Epstein-Barr virus infection|Human immunodeficiency virus 1 infection|PD-L1 expression and PD-1 checkpoint pathway in cancer
CD4	1	1	1	0	hypothetical protein [Bos mutus]	GO:0016021,GO:0005886,GO:0015026,GO:0002250,GO:0007155	integral component of membrane|plasma membrane|coreceptor activity|adaptive immune response|cell adhesion	bom04060,bom04514,bom04612,bom04640,bom04658,bom04659,bom04660,bom05135,bom05166,bom05170,bom05235,bom05340	Cytokine-cytokine receptor interaction|Cell adhesion molecules|Antigen processing and presentation|Hematopoietic cell lineage|Th1 and Th2 cell differentiation|Th17 cell differentiation|T cell receptor signaling pathway|Yersinia infection|Human T-cell leukemia virus 1 infection|Human immunodeficiency virus 1 infection|PD-L1 expression and PD-1 checkpoint pathway in cancer|Primary immunodeficiency
CD40LG	1	1	0	0	CD40 ligand [Bos taurus]	GO:0009986,GO:0005615,GO:0016021,GO:0005622,GO:0005886,GO:0005174,GO:0005125,GO:0005164,GO:0007257,GO:0042100,GO:0006955,GO:0006954,GO:0030168,GO:0032733,GO:0032753,GO:0051092,GO:0042102	cell surface|extracellular space|integral component of membrane|intracellular|plasma membrane|CD40 receptor binding|cytokine activity|tumor necrosis factor receptor binding|activation of JUN kinase activity|B cell proliferation|immune response|inflammatory response|platelet activation|positive regulation of interleukin-10 production|positive regulation of interleukin-4 production|positive regulat…	bom04060,bom04064,bom04514,bom04660,bom04672,bom05144,bom05145,bom05310,bom05320,bom05322,bom05330,bom05340,bom05416,bom05417	Cytokine-cytokine receptor interaction|NF-kappa B signaling pathway|Cell adhesion molecules|T cell receptor signaling pathway|Intestinal immune network for IgA production|Malaria|Toxoplasmosis|Asthma|Autoimmune thyroid disease|Systemic lupus erythematosus|Allograft rejection|Primary immunodeficiency|Viral myocarditis|Lipid and atherosclerosis
CD44	1	1	0	1	PREDICTED: CD44 antigen isoform X5 [Bison bison bison]			bom04512,bom04640,bom05169,bom05205,bom05206	ECM-receptor interaction|Hematopoietic cell lineage|Epstein-Barr virus infection|Proteoglycans in cancer|MicroRNAs in cancer
CD5	1	1	0	0	hypothetical protein [Bos mutus]	GO:0009897,GO:0016021,GO:0005886,GO:0005044,GO:0097190,GO:0031295	external side of plasma membrane|integral component of membrane|plasma membrane|scavenger receptor activity|apoptotic signaling pathway|T cell costimulation	bom04640	Hematopoietic cell lineage
CD53	0	1	0	0	hypothetical protein [Bos mutus]	GO:0005911,GO:0005887,GO:0005886,GO:0007166,GO:1901741	cell-cell junction|integral component of plasma membrane|plasma membrane|cell surface receptor signaling pathway|positive regulation of myoblast fusion
CD59	0	1	0	0	PREDICTED: CD59 glycoprotein [Bos mutus]	GO:0031225,GO:0009986,GO:0005886,GO:0001848,GO:0045087,GO:0001971	anchored component of membrane|cell surface|plasma membrane|complement binding|innate immune response|negative regulation of activation of membrane attack complex	bom04610,bom04640	Complement and coagulation cascades|Hematopoietic cell lineage
CD6	1	1	0	0	PREDICTED: T-cell differentiation antigen CD6 [Bos mutus]	GO:0009897,GO:0005576,GO:0001772,GO:0005887,GO:0031226,GO:0042802,GO:0001530,GO:0070891,GO:0005044,GO:0002438,GO:0002250,GO:0007157,GO:0001771,GO:0045087,GO:0031663,GO:1900017,GO:0042102,GO:0032496	external side of plasma membrane|extracellular region|immunological synapse|integral component of plasma membrane|intrinsic component of plasma membrane|identical protein binding|lipopolysaccharide binding|lipoteichoic acid binding|scavenger receptor activity|acute inflammatory response to antigenic stimulus|adaptive immune response|heterophilic cell-cell adhesion via plasma membrane cell adhesio…	bom04514	Cell adhesion molecules
CD68	0	1	0	0	Macrosialin, partial [Bos mutus]	GO:0035577,GO:0010008,GO:0016021,GO:0016020,GO:0005886,GO:0043312	azurophil granule membrane|endosome membrane|integral component of membrane|membrane|plasma membrane|neutrophil degranulation	bom04142	Lysosome
CD74	1	1	1	0	HLA class II histocompatibility antigen gamma chain isoform X1 [Bos taurus]	GO:0009986,GO:0030669,GO:0030666,GO:0012507,GO:0009897,GO:0070062,GO:0000139,GO:0071556,GO:0016021,GO:0005622,GO:0043202,GO:0005765,GO:0035692,GO:0016020,GO:0042613,GO:0005771,GO:0035693,GO:0005886,GO:0032588,GO:0030658,GO:0005773,GO:0001540,GO:0042609,GO:0019955,GO:0004896,GO:0042802,GO:0035718,GO:0042289,GO:0042658,GO:0023026,GO:0050998,GO:0044183,GO:0000187,GO:0019883,GO:0019886,GO:0008283,GO:…	cell surface|clathrin-coated endocytic vesicle membrane|endocytic vesicle membrane|ER to Golgi transport vesicle membrane|external side of plasma membrane|extracellular exosome|Golgi membrane|integral component of lumenal side of endoplasmic reticulum membrane|integral component of membrane|intracellular|lysosomal lumen|lysosomal membrane|macrophage migration inhibitory factor receptor complex|me…	bom04612,bom05152,bom05168	Antigen processing and presentation|Tuberculosis|Herpes simplex virus 1 infection
CD79A	0	1	0	0	PREDICTED: B-cell antigen receptor complex-associated protein alpha chain isoform X1 [Bos mutus]	GO:0019815,GO:0009897,GO:0016021,GO:0045121,GO:0005771,GO:0042803,GO:0004888,GO:0002250,GO:0042113,GO:0030183,GO:0042100,GO:0050853,GO:0051289	B cell receptor complex|external side of plasma membrane|integral component of membrane|membrane raft|multivesicular body|protein homodimerization activity|transmembrane signaling receptor activity|adaptive immune response|B cell activation|B cell differentiation|B cell proliferation|B cell receptor signaling pathway|protein homotetramerization	bom04662,bom05340	B cell receptor signaling pathway|Primary immunodeficiency
CD9	1	1	0	0	PREDICTED: CD9 antigen, partial [Bos mutus]	GO:0005887,GO:0016020,GO:0005178,GO:0007155,GO:0007166,GO:0071404,GO:0007342,GO:0008285,GO:0090331,GO:0030913,GO:0031623	integral component of plasma membrane|membrane|integrin binding|cell adhesion|cell surface receptor signaling pathway|cellular response to low-density lipoprotein particle stimulus|fusion of sperm to egg plasma membrane involved in single fertilization|negative regulation of cell proliferation|negative regulation of platelet aggregation|paranodal junction assembly|receptor internalization	bom04640	Hematopoietic cell lineage
CDA	1	1	1	1	cytidine deaminase [Bos taurus]	GO:0005829,GO:0004126,GO:0042802,GO:0001882,GO:0042803,GO:0008270,GO:0009972,GO:0030308,GO:0045980,GO:0051289	cytosol|cytidine deaminase activity|identical protein binding|nucleoside binding|protein homodimerization activity|zinc ion binding|cytidine deamination|negative regulation of cell growth|negative regulation of nucleotide metabolic process|protein homotetramerization	bom00240,bom00983	Pyrimidine metabolism|Drug metabolism - other enzymes
CDC20	0	1	1	1	cell division cycle protein 20 homolog isoform X1 [Felis catus]	GO:0005680,GO:0005829,GO:0005815,GO:0005654,GO:0000922,GO:0010997,GO:0019899,GO:0008022,GO:0097027,GO:0031145,GO:0051301,GO:0007064,GO:0090307,GO:1904146,GO:0090129,GO:0031915,GO:1904668,GO:0016567,GO:0040020	anaphase-promoting complex|cytosol|microtubule organizing center|nucleoplasm|spindle pole|anaphase-promoting complex binding|enzyme binding|protein C-terminus binding|ubiquitin-protein transferase activator activity|anaphase-promoting complex-dependent catabolic process|cell division|mitotic sister chromatid cohesion|mitotic spindle assembly|positive regulation of meiotic cell cycle process invol…	bom04110,bom04114,bom04120,bom05166,bom05203	Cell cycle|Oocyte meiosis|Ubiquitin mediated proteolysis|Human T-cell leukemia virus 1 infection|Viral carcinogenesis
CDC25B	0	0	1	1	M-phase inducer phosphatase 2 isoform X1 [Bos taurus]			bom04010,bom04110,bom04914,bom05206	MAPK signaling pathway|Cell cycle|Progesterone-mediated oocyte maturation|MicroRNAs in cancer
CDC25C	0	1	1	0	PREDICTED: M-phase inducer phosphatase 3 [Bos mutus]	GO:0005737,GO:0016607,GO:0005634,GO:0019901,GO:0004725,GO:0050699,GO:0051301,GO:0000086,GO:0010971,GO:0110032,GO:0045931	cytoplasm|nuclear speck|nucleus|protein kinase binding|protein tyrosine phosphatase activity|WW domain binding|cell division|G2/M transition of mitotic cell cycle|positive regulation of G2/M transition of mitotic cell cycle|positive regulation of G2/MI transition of meiotic cell cycle|positive regulation of mitotic cell cycle	bom04110,bom04114,bom04914,bom05170,bom05206	Cell cycle|Oocyte meiosis|Progesterone-mediated oocyte maturation|Human immunodeficiency virus 1 infection|MicroRNAs in cancer
CDC42EP1	1	1	0	0	PREDICTED: cdc42 effector protein 1 [Bos mutus]	GO:0005737,GO:0005856,GO:0012505,GO:0005886,GO:0017049,GO:0030838,GO:0031274,GO:0008360,GO:0007266	cytoplasm|cytoskeleton|endomembrane system|plasma membrane|GTP-Rho binding|positive regulation of actin filament polymerization|positive regulation of pseudopodium assembly|regulation of cell shape|Rho protein signal transduction
CDCA2	0	1	0	1	PREDICTED: LOW QUALITY PROTEIN: cell division cycle-associated protein 2 [Bos mutus]	GO:0005634,GO:0007049,GO:0051301,GO:0035307	nucleus|cell cycle|cell division|positive regulation of protein dephosphorylation
CDCA5	0	1	0	0	PREDICTED: sororin [Bos mutus]	GO:0005694,GO:0000775,GO:0008278,GO:0005737,GO:0005829,GO:0000790,GO:0005654,GO:0005634,GO:0003682,GO:0044877,GO:0051301,GO:0006302,GO:0000278,GO:0007076,GO:0007080,GO:0007064,GO:0031536,GO:0071922	chromosome|chromosome, centromeric region|cohesin complex|cytoplasm|cytosol|nuclear chromatin|nucleoplasm|nucleus|chromatin binding|protein-containing complex binding|cell division|double-strand break repair|mitotic cell cycle|mitotic chromosome condensation|mitotic metaphase plate congression|mitotic sister chromatid cohesion|positive regulation of exit from mitosis|regulation of cohesin loading	bom05206	MicroRNAs in cancer
CDCA8	0	0	1	0	borealin [Bos taurus]	GO:0032133,GO:0000775,GO:0005737,GO:0005730,GO:0032991,GO:0005819,GO:0007049,GO:0051301	chromosome passenger complex|chromosome, centromeric region|cytoplasm|nucleolus|protein-containing complex|spindle|cell cycle|cell division
CDH11	0	1	0	0	cadherin-11 precursor [Bos taurus]	GO:0016342,GO:0009986,GO:0005913,GO:0005737,GO:0070062,GO:0098978,GO:0016021,GO:0005886,GO:0098685,GO:0045296,GO:0005509,GO:0008092,GO:0042803,GO:0034332,GO:0016339,GO:0007155,GO:0098609,GO:0044331,GO:0007043,GO:0021957,GO:0007156,GO:0050804,GO:0001503,GO:0001501	catenin complex|cell surface|cell-cell adherens junction|cytoplasm|extracellular exosome|glutamatergic synapse|integral component of membrane|plasma membrane|Schaffer collateral - CA1 synapse|cadherin binding|calcium ion binding|cytoskeletal protein binding|protein homodimerization activity|adherens junction organization|calcium-dependent cell-cell adhesion via plasma membrane cell adhesion molec…
CDH19	0	1	0	0	PREDICTED: cadherin-19 [Bos mutus]	GO:0016342,GO:0009986,GO:0005913,GO:0016021,GO:0005886,GO:0045296,GO:0005509,GO:0008092,GO:0042803,GO:0034332,GO:0016339,GO:0098609,GO:0044331,GO:0007043,GO:0007156	catenin complex|cell surface|cell-cell adherens junction|integral component of membrane|plasma membrane|cadherin binding|calcium ion binding|cytoskeletal protein binding|protein homodimerization activity|adherens junction organization|calcium-dependent cell-cell adhesion via plasma membrane cell adhesion molecules|cell-cell adhesion|cell-cell adhesion mediated by cadherin|cell-cell junction assem…
CDH2	1	1	1	0	PREDICTED: cadherin-2 [Bos mutus]	GO:0045177,GO:0016342,GO:0030054,GO:0009986,GO:0005913,GO:0005737,GO:0099060,GO:0099059,GO:0014704,GO:0030027,GO:0043005,GO:0005886,GO:0014069,GO:0042383,GO:0045202,GO:0045296,GO:0005509,GO:0008092,GO:0042803,GO:0034332,GO:0048514,GO:0016339,GO:0098609,GO:0044331,GO:0007043,GO:0010001,GO:0007156,GO:0097150,GO:0050770,GO:0009966,GO:0051966,GO:0007416	apical part of cell|catenin complex|cell junction|cell surface|cell-cell adherens junction|cytoplasm|integral component of postsynaptic specialization membrane|integral component of presynaptic active zone membrane|intercalated disc|lamellipodium|neuron projection|plasma membrane|postsynaptic density|sarcolemma|synapse|cadherin binding|calcium ion binding|cytoskeletal protein binding|protein homo…	bom04514,bom05412	Cell adhesion molecules|Arrhythmogenic right ventricular cardiomyopathy
CDH22	1	1	0	0	PREDICTED: LOW QUALITY PROTEIN: cadherin-22 [Bos mutus]	GO:0016342,GO:0009986,GO:0005913,GO:0016021,GO:0005886,GO:0045296,GO:0005509,GO:0008092,GO:0042803,GO:0034332,GO:0007420,GO:0016339,GO:0098609,GO:0044331,GO:0007043,GO:0007156	catenin complex|cell surface|cell-cell adherens junction|integral component of membrane|plasma membrane|cadherin binding|calcium ion binding|cytoskeletal protein binding|protein homodimerization activity|adherens junction organization|brain development|calcium-dependent cell-cell adhesion via plasma membrane cell adhesion molecules|cell-cell adhesion|cell-cell adhesion mediated by cadherin|cell-c…
CDH23	0	1	0	0	PREDICTED: cadherin-23 [Bos mutus]
CDH26	0	0	1	1	PREDICTED: cadherin-like protein 26 [Bos mutus]	GO:0016342,GO:0009986,GO:0005913,GO:0016021,GO:0005886,GO:0045294,GO:0008013,GO:0045296,GO:0005509,GO:0008092,GO:0070097,GO:0005178,GO:0042803,GO:0034332,GO:0016339,GO:0035710,GO:0098609,GO:0044331,GO:0007043,GO:0007156	catenin complex|cell surface|cell-cell adherens junction|integral component of membrane|plasma membrane|alpha-catenin binding|beta-catenin binding|cadherin binding|calcium ion binding|cytoskeletal protein binding|delta-catenin binding|integrin binding|protein homodimerization activity|adherens junction organization|calcium-dependent cell-cell adhesion via plasma membrane cell adhesion molecules|C…
CDHR2	0	1	0	1	PREDICTED: cadherin-related family member 2 [Bos mutus]
CDHR4	1	1	0	1	PREDICTED: LOW QUALITY PROTEIN: cadherin-related family member 4 [Bos mutus]	GO:0005887,GO:0005509,GO:0007155,GO:0007156	integral component of plasma membrane|calcium ion binding|cell adhesion|homophilic cell adhesion via plasma membrane adhesion molecules
CDK1	0	1	1	1	cyclin-dependent kinase 1 [Ovis aries]	GO:0005813,GO:0097125,GO:0005737,GO:0005829,GO:0030496,GO:0005759,GO:0072686,GO:0005634,GO:0005876,GO:0005524,GO:0003682,GO:0030332,GO:0004693,GO:0035173,GO:0030544,GO:0008353,GO:0006915,GO:0051301,GO:0008283,GO:0030855,GO:0090166,GO:0044772,GO:0007095,GO:0043066,GO:0018105,GO:0018107,GO:0010971,GO:1905448,GO:1900182,GO:0034501,GO:0006468	centrosome|cyclin B1-CDK1 complex|cytoplasm|cytosol|midbody|mitochondrial matrix|mitotic spindle|nucleus|spindle microtubule|ATP binding|chromatin binding|cyclin binding|cyclin-dependent protein serine/threonine kinase activity|histone kinase activity|Hsp70 protein binding|RNA polymerase II CTD heptapeptide repeat kinase activity|apoptotic process|cell division|cell proliferation|epithelial cell …	bom04110,bom04114,bom04115,bom04218,bom04540,bom04914,bom05170,bom05203	Cell cycle|Oocyte meiosis|p53 signaling pathway|Cellular senescence|Gap junction|Progesterone-mediated oocyte maturation|Human immunodeficiency virus 1 infection|Viral carcinogenesis
CDK6	0	1	0	1	PREDICTED: cyclin-dependent kinase 6 [Bos mutus]			bom04110,bom04115,bom04151,bom04218,bom04934,bom05160,bom05162,bom05163,bom05164,bom05165,bom05167,bom05169,bom05200,bom05203,bom05206,bom05212,bom05214,bom05218,bom05220,bom05222,bom05223,bom05224,bom05225	Cell cycle|p53 signaling pathway|PI3K-Akt signaling pathway|Cellular senescence|Cushing syndrome|Hepatitis C|Measles|Human cytomegalovirus infection|Influenza A|Human papillomavirus infection|Kaposi sarcoma-associated herpesvirus infection|Epstein-Barr virus infection|Pathways in cancer|Viral carcinogenesis|MicroRNAs in cancer|Pancreatic cancer|Glioma|Melanoma|Chronic myeloid leukemia|Small cell …
CDKN2C	1	1	1	1	cyclin-dependent kinase 4 inhibitor C [Bos taurus]			bom01522,bom04110,bom04934,bom05166,bom05202	Endocrine resistance|Cell cycle|Cushing syndrome|Human T-cell leukemia virus 1 infection|Transcriptional misregulation in cancer
CDO1	1	1	0	0	PREDICTED: cysteine dioxygenase type 1 [Bos mutus]	GO:0017172,GO:0005506,GO:0042412	cysteine dioxygenase activity|iron ion binding|taurine biosynthetic process	bom00270,bom00430	Cysteine and methionine metabolism|Taurine and hypotaurine metabolism
CDR2	0	1	1	1	PREDICTED: cerebellar degeneration-related protein 2 [Bos mutus]	GO:0005737	cytoplasm
CELF3	1	1	0	0	hypothetical protein EI555_021000, partial [Monodon monoceros]	GO:0005737,GO:0016604,GO:0005634,GO:1990904,GO:0097322,GO:0003729,GO:0036002,GO:0003723,GO:0030317,GO:0006376,GO:0098781,GO:0030575,GO:0048026,GO:0000381,GO:0008380,GO:0007283	cytoplasm|nuclear body|nucleus|ribonucleoprotein complex|7SK snRNA binding|mRNA binding|pre-mRNA binding|RNA binding|flagellated sperm motility|mRNA splice site selection|ncRNA transcription|nuclear body organization|positive regulation of mRNA splicing, via spliceosome|regulation of alternative mRNA splicing, via spliceosome|RNA splicing|spermatogenesis
CELF4	1	1	0	0	PREDICTED: CUGBP Elav-like family member 4 [Bos mutus]	GO:0005737,GO:0005634,GO:1990904,GO:0042835,GO:0003729,GO:0036002,GO:0003723,GO:0000900,GO:0000380,GO:0009792,GO:0007281,GO:0006376,GO:0090394,GO:0048025,GO:0048026,GO:0000381,GO:1902866	cytoplasm|nucleus|ribonucleoprotein complex|BRE binding|mRNA binding|pre-mRNA binding|RNA binding|translation repressor activity, mRNA regulatory element binding|alternative mRNA splicing, via spliceosome|embryo development ending in birth or egg hatching|germ cell development|mRNA splice site selection|negative regulation of excitatory postsynaptic potential|negative regulation of mRNA splicing,…
CELF6	0	1	0	0	CUGBP Elav-like family member 6 [Bos taurus]	GO:0005737,GO:0005829,GO:0005634,GO:1990904,GO:0003729,GO:0003723,GO:0006376,GO:0000381	cytoplasm|cytosol|nucleus|ribonucleoprotein complex|mRNA binding|RNA binding|mRNA splice site selection|regulation of alternative mRNA splicing, via spliceosome
CELSR3	0	1	0	0	PREDICTED: LOW QUALITY PROTEIN: cadherin EGF LAG seven-pass G-type receptor 3 [Bos mutus]	GO:0016021,GO:0005886,GO:0005509,GO:0004930,GO:0007413,GO:0060271,GO:0036514,GO:0007186,GO:0007156,GO:0001764,GO:1904938,GO:0032880,GO:0001932,GO:0036515,GO:0060071	integral component of membrane|plasma membrane|calcium ion binding|G protein-coupled receptor activity|axonal fasciculation|cilium assembly|dopaminergic neuron axon guidance|G protein-coupled receptor signaling pathway|homophilic cell adhesion via plasma membrane adhesion molecules|neuron migration|planar cell polarity pathway involved in axon guidance|regulation of protein localization|regulatio…
CEMIP	0	1	1	1	PREDICTED: cell migration-inducing and hyaluronan-binding protein [Bos mutus]	GO:0045334,GO:0005905,GO:0030665,GO:0005737,GO:0005783,GO:0005576,GO:0005634,GO:0005886,GO:0032050,GO:0046923,GO:0005540,GO:0004415,GO:0030213,GO:0030214,GO:0030335,GO:0010800,GO:1900020,GO:0090314,GO:0051281,GO:0007605	clathrin-coated endocytic vesicle|clathrin-coated pit|clathrin-coated vesicle membrane|cytoplasm|endoplasmic reticulum|extracellular region|nucleus|plasma membrane|clathrin heavy chain binding|ER retention sequence binding|hyaluronic acid binding|hyalurononglucosaminidase activity|hyaluronan biosynthetic process|hyaluronan catabolic process|positive regulation of cell migration|positive regulatio…
CEND1	0	1	0	0	hypothetical protein EI555_019012 [Monodon monoceros]	GO:0016021,GO:0007628,GO:0021686,GO:0021702,GO:0021941,GO:0030182,GO:0021933	integral component of membrane|adult walking behavior|cerebellar granular layer maturation|cerebellar Purkinje cell differentiation|negative regulation of cerebellar granule cell precursor proliferation|neuron differentiation|radial glia guided migration of cerebellar granule cell
CENPA	1	1	1	1	PREDICTED: histone H3-like centromeric protein A, partial [Bos mutus]	GO:0000777,GO:0000786,GO:0005634,GO:0031492,GO:0046982,GO:0006334	condensed chromosome kinetochore|nucleosome|nucleus|nucleosomal DNA binding|protein heterodimerization activity|nucleosome assembly
CENPE	0	1	1	1	PREDICTED: LOW QUALITY PROTEIN: centromere-associated protein E [Bos mutus]	GO:0005694,GO:0000775,GO:0000777,GO:0000779,GO:0005829,GO:0005871,GO:0000776,GO:0005828,GO:0016020,GO:0005874,GO:0015630,GO:0030496,GO:1990023,GO:0005654,GO:0005634,GO:0051233,GO:0005524,GO:0016887,GO:0043515,GO:0008017,GO:0003777,GO:0019886,GO:0051315,GO:0051301,GO:0007059,GO:0051382,GO:0099607,GO:0051310,GO:0099606,GO:0007018,GO:0000278,GO:0007079,GO:0007080,GO:0007052,GO:0007275,GO:0045860,GO:…	chromosome|chromosome, centromeric region|condensed chromosome kinetochore|condensed chromosome, centromeric region|cytosol|kinesin complex|kinetochore|kinetochore microtubule|membrane|microtubule|microtubule cytoskeleton|midbody|mitotic spindle midzone|nucleoplasm|nucleus|spindle midzone|ATP binding|ATPase activity|kinetochore binding|microtubule binding|microtubule motor activity|antigen proces…
CENPF	0	1	1	1	PREDICTED: centromere protein F [Bos mutus]
CENPN	0	1	1	0	PREDICTED: centromere protein N isoform X1 [Bos mutus]	GO:0000777,GO:0005634,GO:0007059,GO:0051382	condensed chromosome kinetochore|nucleus|chromosome segregation|kinetochore assembly
CEP104	0	1	0	0	PREDICTED: centrosomal protein of 104 kDa, partial [Bos mutus]	GO:0005814,GO:0005929,GO:0000922,GO:0016595,GO:0016594,GO:0016596	centriole|cilium|spindle pole|glutamate binding|glycine binding|thienylcyclohexylpiperidine binding
CEP55	0	0	1	0	centrosomal protein of 55 kDa [Bos taurus]	GO:0005814,GO:0005813,GO:0032154,GO:0090543,GO:0045171,GO:0016020,GO:0005815,GO:0030496,GO:0005886,GO:1904888,GO:0045184,GO:0061952,GO:0000281,GO:0014066,GO:0072001,GO:0000920	centriole|centrosome|cleavage furrow|Flemming body|intercellular bridge|membrane|microtubule organizing center|midbody|plasma membrane|cranial skeletal system development|establishment of protein localization|midbody abscission|mitotic cytokinesis|regulation of phosphatidylinositol 3-kinase signaling|renal system development|septum digestion after cytokinesis
CERK	0	1	0	1	PREDICTED: ceramide kinase [Bos mutus]	GO:0005737,GO:0016021,GO:0005886,GO:0005524,GO:0001729,GO:0102773,GO:0000287,GO:0003951,GO:0006672,GO:0006687	cytoplasm|integral component of membrane|plasma membrane|ATP binding|ceramide kinase activity|dihydroceramide kinase activity|magnesium ion binding|NAD+ kinase activity|ceramide metabolic process|glycosphingolipid metabolic process	bom00600	Sphingolipid metabolism
CERS4	1	1	0	0	PREDICTED: ceramide synthase 4 [Bos mutus]	GO:0005783,GO:0005789,GO:0016021,GO:0031965,GO:0003677,GO:0050291,GO:0046513	endoplasmic reticulum|endoplasmic reticulum membrane|integral component of membrane|nuclear membrane|DNA binding|sphingosine N-acyltransferase activity|ceramide biosynthetic process	bom00600,bom04071	Sphingolipid metabolism|Sphingolipid signaling pathway
CES2	1	1	0	1	PREDICTED: cocaine esterase [Bos mutus]			bom00983	Drug metabolism - other enzymes
CES3	1	1	0	0	Carboxylesterase 3, partial [Bos mutus]
CES5A	1	1	0	0	PREDICTED: carboxylesterase 5A [Bos mutus]	GO:0005615,GO:0052689,GO:0004771,GO:0004806,GO:0016042	extracellular space|carboxylic ester hydrolase activity|sterol esterase activity|triglyceride lipase activity|lipid catabolic process
CFAP36	0	1	0	1	PREDICTED: cilia- and flagella-associated protein 36 isoform X1 [Bos mutus]	GO:0097546,GO:0035869,GO:0005737,GO:0031514,GO:0005634,GO:0047485	ciliary base|ciliary transition zone|cytoplasm|motile cilium|nucleus|protein N-terminus binding
CFAP46	1	1	0	0	PREDICTED: LOW QUALITY PROTEIN: cilia- and flagella-associated protein 46 [Bos mutus]	GO:0005930,GO:0035082,GO:0060294	axoneme|axoneme assembly|cilium movement involved in cell motility
CGREF1	1	1	0	0	hypothetical protein [Bos mutus]	GO:0005576,GO:0005509,GO:0007155,GO:0007050,GO:0008285	extracellular region|calcium ion binding|cell adhesion|cell cycle arrest|negative regulation of cell proliferation
CHAT	0	0	1	0	TPA: choline acetyltransferase-like [Bos taurus]	GO:0005737,GO:0043005,GO:0004102,GO:0008292,GO:0007274	cytoplasm|neuron projection|choline O-acetyltransferase activity|acetylcholine biosynthetic process|neuromuscular synaptic transmission	bom00564,bom04725	Glycerophospholipid metabolism|Cholinergic synapse
CHCHD10	1	1	0	1	PREDICTED: coiled-coil-helix-coiled-coil-helix domain-containing protein 10, mitochondrial [Bos indicus]	GO:0061617,GO:0005758,GO:0005739,GO:0005634,GO:0006754,GO:0090144,GO:0007005,GO:2000984,GO:0006119,GO:1903852,GO:1901030,GO:0090200,GO:0032984	MICOS complex|mitochondrial intermembrane space|mitochondrion|nucleus|ATP biosynthetic process|mitochondrial nucleoid organization|mitochondrion organization|negative regulation of ATP citrate synthase activity|oxidative phosphorylation|positive regulation of cristae formation|positive regulation of mitochondrial outer membrane permeabilization involved in apoptotic signaling pathway|positive reg…	bom05014	Amyotrophic lateral sclerosis
CHGA	1	1	1	1	PREDICTED: chromogranin-A [Bos mutus]	GO:0042583,GO:0005576,GO:0005615,GO:0042629,GO:0030141,GO:0030658,GO:0005509,GO:0086030,GO:0019732,GO:0061844,GO:0050832,GO:0050829,GO:0050830,GO:0052338,GO:0045087,GO:0031640,GO:0045576,GO:0002551,GO:0032762,GO:0043303,GO:0016525,GO:0033604,GO:0046888,GO:0046676,GO:1905183,GO:2000707,GO:0030155	chromaffin granule|extracellular region|extracellular space|mast cell granule|secretory granule|transport vesicle membrane|calcium ion binding|adenylate cyclase-activating adrenergic receptor signaling pathway involved in cardiac muscle relaxation|antifungal humoral response|antimicrobial humoral immune response mediated by antimicrobial peptide|defense response to fungus|defense response to Gram…
CHGB	1	1	1	1	Secretogranin-1, partial [Bos mutus]	GO:0005615,GO:0030141,GO:0030658	extracellular space|secretory granule|transport vesicle membrane
CHI3L2	0	1	0	0	PREDICTED: chitinase-3-like protein 2 [Bos mutus]	GO:0005576,GO:0005615,GO:0030246,GO:0008061,GO:0016787,GO:0005975	extracellular region|extracellular space|carbohydrate binding|chitin binding|hydrolase activity|carbohydrate metabolic process
CHKA	1	0	1	1	PREDICTED: choline kinase alpha, partial [Bos mutus]			bom00564,bom05231	Glycerophospholipid metabolism|Choline metabolism in cancer
CHMP5	0	1	0	0	unnamed protein product, partial [Gulo gulo]	GO:0005829,GO:0010008,GO:0005634,GO:0071222,GO:0071225,GO:0008333,GO:0007040,GO:0061952,GO:0007080,GO:0071985,GO:0061763,GO:0006997,GO:0015031,GO:0010824,GO:1901673,GO:0001919,GO:0000920,GO:0046755	cytosol|endosome membrane|nucleus|cellular response to lipopolysaccharide|cellular response to muramyl dipeptide|endosome to lysosome transport|lysosome organization|midbody abscission|mitotic metaphase plate congression|multivesicular body sorting pathway|multivesicular body-lysosome fusion|nucleus organization|protein transport|regulation of centrosome duplication|regulation of mitotic spindle …	bom04144,bom04217	Endocytosis|Necroptosis
CHODL	1	1	0	0	chondrolectin precursor [Bos taurus]
CHP1	0	1	1	1	hypothetical protein DBR06_SOUSAS20610042, partial [Sousa chinensis]	GO:0005737,GO:0005783,GO:0005793,GO:0000139,GO:0015630,GO:0005634,GO:0005886,GO:0030133,GO:0005509,GO:0048306,GO:0019900,GO:0008017,GO:0004860,GO:0005215,GO:0071468,GO:0031122,GO:0022406,GO:0061025,GO:0061024,GO:0001578,GO:0070885,GO:0032088,GO:0010923,GO:0031953,GO:0042308,GO:0006469,GO:0001933,GO:0031397,GO:0060050,GO:0090314,GO:0051222,GO:0032417,GO:0006611,GO:0050821,GO:0051453,GO:1901214	cytoplasm|endoplasmic reticulum|endoplasmic reticulum-Golgi intermediate compartment|Golgi membrane|microtubule cytoskeleton|nucleus|plasma membrane|transport vesicle|calcium ion binding|calcium-dependent protein binding|kinase binding|microtubule binding|protein kinase inhibitor activity|transporter activity|cellular response to acidic pH|cytoplasmic microtubule organization|membrane docking|mem…
CHPF	1	1	0	0	PREDICTED: LOW QUALITY PROTEIN: chondroitin sulfate synthase 2 [Bos mutus]	GO:0005829,GO:0032580,GO:0000139,GO:0016021,GO:0005759,GO:0047238,GO:0046872,GO:0050510,GO:0030206	cytosol|Golgi cisterna membrane|Golgi membrane|integral component of membrane|mitochondrial matrix|glucuronosyl-N-acetylgalactosaminyl-proteoglycan 4-beta-N-acetylgalactosaminyltransferase activity|metal ion binding|N-acetylgalactosaminyl-proteoglycan 3-beta-glucuronosyltransferase activity|chondroitin sulfate biosynthetic process	bom00532	Glycosaminoglycan biosynthesis - chondroitin sulfate / dermatan sulfate
CHPF2	1	1	0	1	PREDICTED: chondroitin sulfate glucuronyltransferase [Bos mutus]	GO:0032580,GO:0000139,GO:0016021,GO:0016020,GO:0008376,GO:0050510,GO:0030206	Golgi cisterna membrane|Golgi membrane|integral component of membrane|membrane|acetylgalactosaminyltransferase activity|N-acetylgalactosaminyl-proteoglycan 3-beta-glucuronosyltransferase activity|chondroitin sulfate biosynthetic process	bom00532	Glycosaminoglycan biosynthesis - chondroitin sulfate / dermatan sulfate
CHPT1	1	1	0	0	Cholinephosphotransferase 1, partial [Bos mutus]	GO:0005789,GO:0005794,GO:0000139,GO:0016021,GO:0004142,GO:0046872,GO:0016780,GO:0006663	endoplasmic reticulum membrane|Golgi apparatus|Golgi membrane|integral component of membrane|diacylglycerol cholinephosphotransferase activity|metal ion binding|phosphotransferase activity, for other substituted phosphate groups|platelet activating factor biosynthetic process	bom00440,bom00564,bom00565,bom05231	Phosphonate and phosphinate metabolism|Glycerophospholipid metabolism|Ether lipid metabolism|Choline metabolism in cancer
CHRD	1	1	0	1	Chordin, partial [Bos mutus]	GO:0005615,GO:0019955,GO:0008201,GO:0045545,GO:0021919,GO:0033504,GO:0030900,GO:0001702,GO:0001707,GO:0030514,GO:0030336,GO:0045668,GO:0001649,GO:0045785,GO:0002053,GO:0001501	extracellular space|cytokine binding|heparin binding|syndecan binding|BMP signaling pathway involved in spinal cord dorsal/ventral patterning|floor plate development|forebrain development|gastrulation with mouth forming second|mesoderm formation|negative regulation of BMP signaling pathway|negative regulation of cell migration|negative regulation of osteoblast differentiation|osteoblast different…	bom04350	TGF-beta signaling pathway
CHRM1	1	0	0	0	muscarinic acetylcholine receptor M1 isoform X2 [Mustela erminea]	GO:0030054,GO:0005887,GO:0005622,GO:0045211,GO:0004935,GO:0016907,GO:0071880,GO:0007188,GO:0050890,GO:0040012,GO:0046541	cell junction|integral component of plasma membrane|intracellular|postsynaptic membrane|adrenergic receptor activity|G protein-coupled acetylcholine receptor activity|adenylate cyclase-activating adrenergic receptor signaling pathway|adenylate cyclase-modulating G protein-coupled receptor signaling pathway|cognition|regulation of locomotion|saliva secretion	bom04020,bom04024,bom04080,bom04151,bom04725,bom04810,bom05010,bom05022	Calcium signaling pathway|cAMP signaling pathway|Neuroactive ligand-receptor interaction|PI3K-Akt signaling pathway|Cholinergic synapse|Regulation of actin cytoskeleton|Alzheimer disease|Pathways of neurodegeneration - multiple diseases
CHRNA9	1	1	0	1	Neuronal acetylcholine receptor subunit alpha-9, partial [Bos mutus]	GO:0005892,GO:0030054,GO:0098981,GO:0005887,GO:0099060,GO:0043005,GO:0005886,GO:0045202,GO:0022848,GO:0005262,GO:0015276,GO:0004888,GO:0007268,GO:0050910,GO:0042472,GO:0034220,GO:0070373,GO:0050877,GO:0007204,GO:0042391,GO:0007165	acetylcholine-gated channel complex|cell junction|cholinergic synapse|integral component of plasma membrane|integral component of postsynaptic specialization membrane|neuron projection|plasma membrane|synapse|acetylcholine-gated cation-selective channel activity|calcium channel activity|ligand-gated ion channel activity|transmembrane signaling receptor activity|chemical synaptic transmission|dete…	bom04080,bom05207	Neuroactive ligand-receptor interaction|Chemical carcinogenesis - receptor activation
CHRNB4	0	1	0	0	PREDICTED: neuronal acetylcholine receptor subunit beta-4 [Bos mutus]	GO:0005892,GO:0030054,GO:0005887,GO:0043005,GO:0045211,GO:0045202,GO:0022848,GO:0004888,GO:0007268,GO:0034220,GO:0050877,GO:0007274,GO:0042391,GO:0035094,GO:0007165,GO:0007271	acetylcholine-gated channel complex|cell junction|integral component of plasma membrane|neuron projection|postsynaptic membrane|synapse|acetylcholine-gated cation-selective channel activity|transmembrane signaling receptor activity|chemical synaptic transmission|ion transmembrane transport|nervous system process|neuromuscular synaptic transmission|regulation of membrane potential|response to nico…	bom04080,bom04725,bom05207	Neuroactive ligand-receptor interaction|Cholinergic synapse|Chemical carcinogenesis - receptor activation
CHST1	1	1	0	1	PREDICTED: carbohydrate sulfotransferase 1 [Bos mutus]			bom00533	Glycosaminoglycan biosynthesis - keratan sulfate
CHST14	1	1	0	0	PREDICTED: carbohydrate sulfotransferase 14 [Bos mutus]	GO:0070062,GO:0000139,GO:0016021,GO:0001537,GO:0042301,GO:0016051,GO:0030208,GO:0050655	extracellular exosome|Golgi membrane|integral component of membrane|N-acetylgalactosamine 4-O-sulfotransferase activity|phosphate ion binding|carbohydrate biosynthetic process|dermatan sulfate biosynthetic process|dermatan sulfate proteoglycan metabolic process	bom00532	Glycosaminoglycan biosynthesis - chondroitin sulfate / dermatan sulfate
CHST15	1	0	0	0	PREDICTED: carbohydrate sulfotransferase 15 [Bos mutus]	GO:0000139,GO:0016021,GO:0050656,GO:0050659,GO:0030206,GO:0019319	Golgi membrane|integral component of membrane|3'-phosphoadenosine 5'-phosphosulfate binding|N-acetylgalactosamine 4-sulfate 6-O-sulfotransferase activity|chondroitin sulfate biosynthetic process|hexose biosynthetic process	bom00532	Glycosaminoglycan biosynthesis - chondroitin sulfate / dermatan sulfate
CHST2	1	1	0	0	carbohydrate sulfotransferase 2 [Odocoileus virginianus texanus]	GO:0005794,GO:0000139,GO:0016021,GO:0005802,GO:0001517,GO:0008146,GO:0005975,GO:0006954,GO:0006044,GO:0006790	Golgi apparatus|Golgi membrane|integral component of membrane|trans-Golgi network|N-acetylglucosamine 6-O-sulfotransferase activity|sulfotransferase activity|carbohydrate metabolic process|inflammatory response|N-acetylglucosamine metabolic process|sulfur compound metabolic process	bom00533	Glycosaminoglycan biosynthesis - keratan sulfate
CIDEA	1	1	1	1	PREDICTED: cell death activator CIDE-A isoform X1 [Bos mutus]	GO:0005737,GO:0005829,GO:0005811,GO:0005740,GO:0005739,GO:0005634,GO:0042803,GO:0006915,GO:0008219,GO:0034389,GO:0006629,GO:0019915,GO:0120163,GO:0050710,GO:1900118,GO:0050995,GO:0030512,GO:0032720,GO:0010890,GO:1902510,GO:0035634,GO:0001659	cytoplasm|cytosol|lipid droplet|mitochondrial envelope|mitochondrion|nucleus|protein homodimerization activity|apoptotic process|cell death|lipid droplet organization|lipid metabolic process|lipid storage|negative regulation of cold-induced thermogenesis|negative regulation of cytokine secretion|negative regulation of execution phase of apoptosis|negative regulation of lipid catabolic process|neg…
CIDEC	0	1	0	0	PREDICTED: cell death activator CIDE-3 isoform X1 [Bos mutus]	GO:0005829,GO:0005783,GO:0005811,GO:0005634,GO:0097194,GO:0034389	cytosol|endoplasmic reticulum|lipid droplet|nucleus|execution phase of apoptosis|lipid droplet organization
CIITA	0	1	0	1	PREDICTED: MHC class II transactivator [Bos mutus]			bom04612,bom05145,bom05152,bom05164,bom05340	Antigen processing and presentation|Toxoplasmosis|Tuberculosis|Influenza A|Primary immunodeficiency
CIRBP	0	1	0	1	cold-inducible RNA-binding protein [Bos taurus]	GO:0005737,GO:0010494,GO:0005730,GO:0005654,GO:0005634,GO:1990904,GO:0005681,GO:0003730,GO:0008266,GO:0003723,GO:0070181,GO:0030371,GO:0048255,GO:0048026,GO:0045727,GO:0009409,GO:0009411,GO:0034063	cytoplasm|cytoplasmic stress granule|nucleolus|nucleoplasm|nucleus|ribonucleoprotein complex|spliceosomal complex|mRNA 3'-UTR binding|poly(U) RNA binding|RNA binding|small ribosomal subunit rRNA binding|translation repressor activity|mRNA stabilization|positive regulation of mRNA splicing, via spliceosome|positive regulation of translation|response to cold|response to UV|stress granule assembly
CISD1	1	1	1	1	CDGSH iron-sulfur domain-containing protein 1 isoform X1 [Bos taurus]	GO:0016021,GO:0005741,GO:0051537,GO:0042802,GO:0046872,GO:0043457	integral component of membrane|mitochondrial outer membrane|2 iron, 2 sulfur cluster binding|identical protein binding|metal ion binding|regulation of cellular respiration
CISD3	1	1	0	0	PREDICTED: LOW QUALITY PROTEIN: CDGSH iron-sulfur domain-containing protein 3, mitochondrial [Bos mutus]	GO:0005739,GO:0051537,GO:0046872	mitochondrion|2 iron, 2 sulfur cluster binding|metal ion binding
CIT	0	0	1	1	PREDICTED: citron Rho-interacting kinase isoform X1 [Bos mutus]	GO:0032154,GO:0005829,GO:0031985,GO:0016020,GO:0030496,GO:0043025,GO:0005524,GO:0046872,GO:0030165,GO:0004674,GO:0017048,GO:0097110,GO:0017124,GO:0000086,GO:0048699,GO:0007030,GO:0035556,GO:0000278,GO:0000281,GO:0051402,GO:0032467,GO:0008064	cleavage furrow|cytosol|Golgi cisterna|membrane|midbody|neuronal cell body|ATP binding|metal ion binding|PDZ domain binding|protein serine/threonine kinase activity|Rho GTPase binding|scaffold protein binding|SH3 domain binding|G2/M transition of mitotic cell cycle|generation of neurons|Golgi organization|intracellular signal transduction|mitotic cell cycle|mitotic cytokinesis|neuron apoptotic pr…
CKAP2	0	1	1	1	Cytoskeleton-associated protein 2, partial [Bos mutus]	GO:0005737,GO:0005874,GO:0006915,GO:0007049	cytoplasm|microtubule|apoptotic process|cell cycle
CKAP2L	1	1	1	1	hypothetical protein [Bos mutus]	GO:0005813,GO:0005829,GO:0072686,GO:0000922	centrosome|cytosol|mitotic spindle|spindle pole
CKAP4	1	1	0	0	PREDICTED: cytoskeleton-associated protein 4 [Bos mutus]	GO:0035577,GO:0036464,GO:0005856,GO:0005829,GO:0005783,GO:0005788,GO:0005789,GO:0070062,GO:0016021,GO:0042599,GO:0005811,GO:0016020,GO:0016607,GO:0048471,GO:0005886,GO:0005791,GO:0035579,GO:0003723,GO:0044267,GO:0043312,GO:0043687	azurophil granule membrane|cytoplasmic ribonucleoprotein granule|cytoskeleton|cytosol|endoplasmic reticulum|endoplasmic reticulum lumen|endoplasmic reticulum membrane|extracellular exosome|integral component of membrane|lamellar body|lipid droplet|membrane|nuclear speck|perinuclear region of cytoplasm|plasma membrane|rough endoplasmic reticulum|specific granule membrane|RNA binding|cellular prote…	bom04141	Protein processing in endoplasmic reticulum
CKMT1A	1	1	1	1	PREDICTED: LOW QUALITY PROTEIN: creatine kinase U-type, mitochondrial [Bos mutus]	GO:0005743,GO:0043209,GO:0005524,GO:0004111,GO:0043066,GO:0032091	mitochondrial inner membrane|myelin sheath|ATP binding|creatine kinase activity|negative regulation of apoptotic process|negative regulation of protein binding	bom00330	Arginine and proline metabolism
CKS2	0	1	1	1	hypothetical protein DBR06_SOUSAS21110004, partial [Sousa chinensis]	GO:0000307,GO:0019005,GO:0003682,GO:0061575,GO:0042393,GO:0019901,GO:0043130,GO:0051301,GO:0008283,GO:0007127,GO:0044772,GO:0045737,GO:0007346,GO:0006357	cyclin-dependent protein kinase holoenzyme complex|SCF ubiquitin ligase complex|chromatin binding|cyclin-dependent protein serine/threonine kinase activator activity|histone binding|protein kinase binding|ubiquitin binding|cell division|cell proliferation|meiosis I|mitotic cell cycle phase transition|positive regulation of cyclin-dependent protein serine/threonine kinase activity|regulation of mi…	bom05200,bom05222	Pathways in cancer|Small cell lung cancer
CLCA1	1	0	0	0	PREDICTED: calcium-activated chloride channel regulator 1 [Bos mutus]	GO:0005615,GO:0005887,GO:0005902,GO:0030141,GO:0005229,GO:0046872,GO:0008237,GO:0006816	extracellular space|integral component of plasma membrane|microvillus|secretory granule|intracellular calcium activated chloride channel activity|metal ion binding|metallopeptidase activity|calcium ion transport	bom04924,bom04972	Renin secretion|Pancreatic secretion
CLCA2	1	1	0	0	calcium-activated chloride channel regulator 2 [Bos taurus]	GO:0009925,GO:0030054,GO:0005829,GO:0005576,GO:0005887,GO:0031965,GO:0005634,GO:0005886,GO:0005254,GO:0005229,GO:0015276,GO:0046872,GO:0004222,GO:0007155,GO:0034220	basal plasma membrane|cell junction|cytosol|extracellular region|integral component of plasma membrane|nuclear membrane|nucleus|plasma membrane|chloride channel activity|intracellular calcium activated chloride channel activity|ligand-gated ion channel activity|metal ion binding|metalloendopeptidase activity|cell adhesion|ion transmembrane transport	bom04924,bom04972	Renin secretion|Pancreatic secretion
CLCF1	1	1	0	1	cardiotrophin-like cytokine factor 1 isoform X2 [Bos taurus]	GO:0097059,GO:0097058,GO:0005576,GO:0005622,GO:0005127,GO:0005125,GO:0046982,GO:0005102,GO:0030183,GO:0007166,GO:0007259,GO:2000672,GO:0043524,GO:0048711,GO:0030890,GO:0008284,GO:0051466,GO:0002639,GO:0048295,GO:0002830,GO:0042531,GO:0070372,GO:0050727,GO:0051896	CNTFR-CLCF1 complex|CRLF-CLCF1 complex|extracellular region|intracellular|ciliary neurotrophic factor receptor binding|cytokine activity|protein heterodimerization activity|signaling receptor binding|B cell differentiation|cell surface receptor signaling pathway|JAK-STAT cascade|negative regulation of motor neuron apoptotic process|negative regulation of neuron apoptotic process|positive regulati…	bom04060	Cytokine-cytokine receptor interaction
CLCN2	1	1	0	0	chloride channel 2, isoform CRA_a, partial [Homo sapiens]	GO:0034707,GO:0005886,GO:0005247,GO:0060689,GO:0034765,GO:0060041	chloride channel complex|plasma membrane|voltage-gated chloride channel activity|cell differentiation involved in salivary gland development|regulation of ion transmembrane transport|retina development in camera-type eye	bom04978	Mineral absorption
CLCN4	1	1	0	0	hypothetical protein [Bos mutus]	GO:0005769,GO:0031901,GO:0005789,GO:0005768,GO:0010008,GO:0005794,GO:0005887,GO:0031902,GO:0005886,GO:0015297,GO:0005524,GO:0005254,GO:0031404,GO:0015299,GO:0005247,GO:0006821,GO:0034220	early endosome|early endosome membrane|endoplasmic reticulum membrane|endosome|endosome membrane|Golgi apparatus|integral component of plasma membrane|late endosome membrane|plasma membrane|antiporter activity|ATP binding|chloride channel activity|chloride ion binding|solute:proton antiporter activity|voltage-gated chloride channel activity|chloride transport|ion transmembrane transport	bom04613	Neutrophil extracellular trap formation
CLDN11	1	1	0	0	PREDICTED: claudin-11 [Bos mutus]	GO:0005923,GO:0016021,GO:0005886,GO:0005198	bicellular tight junction|integral component of membrane|plasma membrane|structural molecule activity	bom04514,bom04530,bom04670,bom05160	Cell adhesion molecules|Tight junction|Leukocyte transendothelial migration|Hepatitis C
CLDN17	0	1	1	1	PREDICTED: claudin-17 [Bos mutus]	GO:0005923,GO:0034707,GO:0005886,GO:0005254,GO:0042802,GO:0005198,GO:0016338	bicellular tight junction|chloride channel complex|plasma membrane|chloride channel activity|identical protein binding|structural molecule activity|calcium-independent cell-cell adhesion via plasma membrane cell-adhesion molecules	bom04514,bom04530,bom04670,bom05160	Cell adhesion molecules|Tight junction|Leukocyte transendothelial migration|Hepatitis C
CLDN5	1	1	0	0	PREDICTED: LOW QUALITY PROTEIN: claudin-5 [Bos mutus]	GO:0005923,GO:0016021,GO:0005886,GO:0005198	bicellular tight junction|integral component of membrane|plasma membrane|structural molecule activity	bom04514,bom04530,bom04670,bom05160	Cell adhesion molecules|Tight junction|Leukocyte transendothelial migration|Hepatitis C
CLEC11A	1	0	0	0	PREDICTED: C-type lectin domain family 11 member A [Bos mutus]
CLEC3B	1	1	0	0	PREDICTED: tetranectin [Bos mutus]	GO:0005737,GO:0005615,GO:0001652,GO:0005509,GO:0030246,GO:0008201,GO:0036143,GO:0030282,GO:0071560,GO:0001503,GO:0010756	cytoplasm|extracellular space|granular component|calcium ion binding|carbohydrate binding|heparin binding|kringle domain binding|bone mineralization|cellular response to transforming growth factor beta stimulus|ossification|positive regulation of plasminogen activation
CLEC4E	0	1	0	0	PREDICTED: C-type lectin domain family 4 member E [Bos mutus]			bom04625,bom05152	C-type lectin receptor signaling pathway|Tuberculosis
CLGN	0	1	0	0	Calmegin, partial [Bos mutus]	GO:0005789,GO:0016021,GO:0005635,GO:0005509,GO:0044183,GO:0051082,GO:0007339,GO:0065003	endoplasmic reticulum membrane|integral component of membrane|nuclear envelope|calcium ion binding|protein binding involved in protein folding|unfolded protein binding|binding of sperm to zona pellucida|protein-containing complex assembly
CLIP2	1	1	0	0	PREDICTED: CAP-Gly domain-containing linker protein 2, partial [Bos mutus]	GO:0005881,GO:0030425,GO:1901588,GO:0042599,GO:0035371,GO:0008017,GO:0051010,GO:0007026	cytoplasmic microtubule|dendrite|dendritic microtubule|lamellar body|microtubule plus-end|microtubule binding|microtubule plus-end binding|negative regulation of microtubule depolymerization
CLMN	1	1	0	1	PREDICTED: calmin [Bos mutus]	GO:0005737,GO:0016021,GO:0034993,GO:0005640,GO:0051015,GO:0090286,GO:0008285,GO:0031175,GO:0007097,GO:0051647	cytoplasm|integral component of membrane|meiotic nuclear membrane microtubule tethering complex|nuclear outer membrane|actin filament binding|cytoskeletal anchoring at nuclear membrane|negative regulation of cell proliferation|neuron projection development|nuclear migration|nucleus localization
CLMP	0	1	0	0	PREDICTED: CXADR-like membrane protein [Bos mutus]	GO:0005923,GO:0009986,GO:0005881,GO:0016021,GO:0005886,GO:0048565	bicellular tight junction|cell surface|cytoplasmic microtubule|integral component of membrane|plasma membrane|digestive tract development
CLPB	0	1	0	0	PREDICTED: caseinolytic peptidase B protein homolog isoform X1 [Bos mutus]	GO:0005739,GO:0005524,GO:0016887,GO:0034605	mitochondrion|ATP binding|ATPase activity|cellular response to heat	bom04213	Longevity regulating pathway - multiple species
CLSTN2	0	1	0	0	PREDICTED: calsyntenin-2 [Bos mutus]	GO:0009986,GO:0005789,GO:0098978,GO:0000139,GO:0099061,GO:0045211,GO:0005509,GO:0007156,GO:0051965,GO:0050806	cell surface|endoplasmic reticulum membrane|glutamatergic synapse|Golgi membrane|integral component of postsynaptic density membrane|postsynaptic membrane|calcium ion binding|homophilic cell adhesion via plasma membrane adhesion molecules|positive regulation of synapse assembly|positive regulation of synaptic transmission
CLSTN3	1	1	0	0	PREDICTED: calsyntenin-3 isoform X1 [Bos mutus]	GO:0009986,GO:0005789,GO:0098982,GO:0098978,GO:0000139,GO:0099061,GO:0045211,GO:0032991,GO:0005509,GO:0007156,GO:1902474,GO:0051965,GO:0050806,GO:0001558,GO:1905606,GO:0007416,GO:0051932,GO:0035249	cell surface|endoplasmic reticulum membrane|GABA-ergic synapse|glutamatergic synapse|Golgi membrane|integral component of postsynaptic density membrane|postsynaptic membrane|protein-containing complex|calcium ion binding|homophilic cell adhesion via plasma membrane adhesion molecules|positive regulation of protein localization to synapse|positive regulation of synapse assembly|positive regulation…
CLYBL	1	1	0	1	PREDICTED: citrate lyase subunit beta-like protein, mitochondrial [Bos mutus]	GO:0005739,GO:0047777,GO:0000287,GO:0004474,GO:0070207,GO:0106064	mitochondrion|(3S)-citramalyl-CoA lyase activity|magnesium ion binding|malate synthase activity|protein homotrimerization|regulation of cobalamin metabolic process
CMBL	1	1	0	1	PREDICTED: carboxymethylenebutenolidase homolog [Bos mutus]	GO:0005829,GO:0070062,GO:0016787,GO:0006805	cytosol|extracellular exosome|hydrolase activity|xenobiotic metabolic process
CMPK1	1	1	1	1	PREDICTED: LOW QUALITY PROTEIN: UMP-CMP kinase [Bos mutus]	GO:0005737,GO:0005730,GO:0005524,GO:0004127,GO:0004550,GO:0009041,GO:0006207,GO:0006165,GO:0009142,GO:0006221	cytoplasm|nucleolus|ATP binding|cytidylate kinase activity|nucleoside diphosphate kinase activity|uridylate kinase activity|'de novo' pyrimidine nucleobase biosynthetic process|nucleoside diphosphate phosphorylation|nucleoside triphosphate biosynthetic process|pyrimidine nucleotide biosynthetic process	bom00240,bom00983	Pyrimidine metabolism|Drug metabolism - other enzymes
CMPK2	0	0	1	1	hypothetical protein [Bos mutus]	GO:0005737,GO:0005739,GO:0005524,GO:0004127,GO:0004550,GO:0004798,GO:0033862,GO:0009041,GO:0071222,GO:0006233,GO:0006235,GO:0006227,GO:0006165,GO:0009142	cytoplasm|mitochondrion|ATP binding|cytidylate kinase activity|nucleoside diphosphate kinase activity|thymidylate kinase activity|UMP kinase activity|uridylate kinase activity|cellular response to lipopolysaccharide|dTDP biosynthetic process|dTTP biosynthetic process|dUDP biosynthetic process|nucleoside diphosphate phosphorylation|nucleoside triphosphate biosynthetic process	bom00240	Pyrimidine metabolism
CMTM3	1	1	0	0	PREDICTED: CKLF-like MARVEL transmembrane domain-containing protein 3 [Bos mutus]	GO:0005737,GO:0005615,GO:0016021,GO:0031965,GO:0005125,GO:0001835,GO:0006935,GO:0050861	cytoplasm|extracellular space|integral component of membrane|nuclear membrane|cytokine activity|blastocyst hatching|chemotaxis|positive regulation of B cell receptor signaling pathway
CNGA3	1	0	0	0	PREDICTED: cyclic nucleotide-gated cation channel alpha-3 [Bos mutus]	GO:0016021,GO:0030553,GO:0005222,GO:0005223,GO:0050896,GO:0007601	integral component of membrane|cGMP binding|intracellular cAMP-activated cation channel activity|intracellular cGMP-activated cation channel activity|response to stimulus|visual perception	bom04024,bom04740	cAMP signaling pathway|Olfactory transduction
CNIH2	0	1	0	0	PREDICTED: protein cornichon homolog 2, partial [Bos mutus]	GO:0032281,GO:0030054,GO:0030425,GO:0043198,GO:0043197,GO:0005789,GO:0033116,GO:0012507,GO:0098978,GO:0000139,GO:0099061,GO:0014069,GO:0045211,GO:0048208,GO:0006888,GO:0051668,GO:1903743,GO:1902684,GO:2000311,GO:0042391,GO:2000310,GO:0098962,GO:0035249	AMPA glutamate receptor complex|cell junction|dendrite|dendritic shaft|dendritic spine|endoplasmic reticulum membrane|endoplasmic reticulum-Golgi intermediate compartment membrane|ER to Golgi transport vesicle membrane|glutamatergic synapse|Golgi membrane|integral component of postsynaptic density membrane|postsynaptic density|postsynaptic membrane|COPII vesicle coating|ER to Golgi vesicle-mediat…
CNN2	1	1	0	0	PREDICTED: calponin-2 isoform X1 [Bos mutus]	GO:0005856,GO:0003779,GO:0005516,GO:0031032	cytoskeleton|actin binding|calmodulin binding|actomyosin structure organization
CNN3	1	1	0	1	hypothetical protein PANDA_003128, partial [Ailuropoda melanoleuca]	GO:0015629,GO:0005829,GO:0003779,GO:0005516,GO:0008017,GO:0031032,GO:0030855	actin cytoskeleton|cytosol|actin binding|calmodulin binding|microtubule binding|actomyosin structure organization|epithelial cell differentiation
CNNM4	1	1	0	1	metal transporter CNNM4 precursor [Bos taurus]	GO:0016323,GO:0030425,GO:0016021,GO:0043025,GO:0032991,GO:0015095,GO:0015081,GO:0070166,GO:0010960,GO:0055065,GO:0050896,GO:0007601	basolateral plasma membrane|dendrite|integral component of membrane|neuronal cell body|protein-containing complex|magnesium ion transmembrane transporter activity|sodium ion transmembrane transporter activity|enamel mineralization|magnesium ion homeostasis|metal ion homeostasis|response to stimulus|visual perception
CNR1	1	1	0	0	cannabinoid receptor 1 [Bos taurus]	GO:0098982,GO:0098978,GO:0030426,GO:0032592,GO:0005887,GO:0099056,GO:0045121,GO:0005741,GO:0005886,GO:0004949,GO:0008144,GO:0099635,GO:0007188,GO:0007568,GO:0007413,GO:0038171,GO:0007186,GO:0007187,GO:0042593,GO:0060135,GO:0007613,GO:0045759,GO:0045776,GO:0033602,GO:0031999,GO:0033004,GO:0051001,GO:0002866,GO:0043065,GO:0045777,GO:0031622,GO:0010976,GO:0060259,GO:0050796,GO:0060405,GO:0032228,GO:…	GABA-ergic synapse|glutamatergic synapse|growth cone|integral component of mitochondrial membrane|integral component of plasma membrane|integral component of presynaptic membrane|membrane raft|mitochondrial outer membrane|plasma membrane|cannabinoid receptor activity|drug binding|voltage-gated calcium channel activity involved in positive regulation of presynaptic cytosolic calcium levels|adenyla…	bom04015,bom04080,bom04714,bom04723	Rap1 signaling pathway|Neuroactive ligand-receptor interaction|Thermogenesis|Retrograde endocannabinoid signaling
CNST	0	1	0	0	PREDICTED: consortin [Bos mutus]	GO:0016021,GO:0043231,GO:0016020,GO:0005886,GO:0032991,GO:0005802,GO:0030133,GO:0071253,GO:0019902,GO:0010923,GO:0042998	integral component of membrane|intracellular membrane-bounded organelle|membrane|plasma membrane|protein-containing complex|trans-Golgi network|transport vesicle|connexin binding|phosphatase binding|negative regulation of phosphatase activity|positive regulation of Golgi to plasma membrane protein transport
CNTFR	1	1	0	1	PREDICTED: ciliary neurotrophic factor receptor subunit alpha [Bos mutus]	GO:0031225,GO:0016324,GO:0070110,GO:0097059,GO:0009897,GO:0019898,GO:0005886,GO:0043235,GO:0004897,GO:0019955,GO:0004896,GO:0045523,GO:0005102,GO:0003360,GO:0070120,GO:0019221,GO:0043524,GO:0007399,GO:0008284,GO:0007548,GO:0007165,GO:0060538,GO:0001967	anchored component of membrane|apical plasma membrane|ciliary neurotrophic factor receptor complex|CNTFR-CLCF1 complex|external side of plasma membrane|extrinsic component of membrane|plasma membrane|receptor complex|ciliary neurotrophic factor receptor activity|cytokine binding|cytokine receptor activity|interleukin-27 receptor binding|signaling receptor binding|brainstem development|ciliary neu…	bom04060,bom04630	Cytokine-cytokine receptor interaction|JAK-STAT signaling pathway
CNTN2	1	1	0	0	PREDICTED: contactin-2 [Bos mutus]	GO:0099025,GO:0030424,GO:0009986,GO:0044224,GO:0043209,GO:0043025,GO:0033268,GO:0005886,GO:0045202,GO:0008076,GO:0030246,GO:0098632,GO:0042802,GO:0043621,GO:0007628,GO:0007411,GO:0007413,GO:0007155,GO:0022010,GO:0021853,GO:0045163,GO:0070593,GO:0071206,GO:0007156,GO:0007612,GO:0000226,GO:0045665,GO:0060168,GO:0010954,GO:0097090,GO:0071205,GO:0031623,GO:0048710,GO:0031133,GO:0048168	anchored component of postsynaptic membrane|axon|cell surface|juxtaparanode region of axon|myelin sheath|neuronal cell body|node of Ranvier|plasma membrane|synapse|voltage-gated potassium channel complex|carbohydrate binding|cell-cell adhesion mediator activity|identical protein binding|protein self-association|adult walking behavior|axon guidance|axonal fasciculation|cell adhesion|central nervou…	bom04514	Cell adhesion molecules
CNTN5	1	1	0	0	PREDICTED: contactin-5, partial [Bos mutus]	GO:0099026,GO:0005829,GO:0005576,GO:0098982,GO:0005886,GO:0007155,GO:0099054,GO:0007605	anchored component of presynaptic membrane|cytosol|extracellular region|GABA-ergic synapse|plasma membrane|cell adhesion|presynapse assembly|sensory perception of sound
CNTNAP2	0	1	0	1	hypothetical protein [Bos mutus]	GO:0030673,GO:0009986,GO:0030425,GO:0005769,GO:0005794,GO:0016021,GO:0044224,GO:0016020,GO:0043025,GO:0033010,GO:0033270,GO:0005886,GO:0097060,GO:0008076,GO:0019899,GO:0044325,GO:0002020,GO:0030534,GO:0007155,GO:0045163,GO:0007612,GO:0021761,GO:0031175,GO:0048812,GO:0008038,GO:0071205,GO:0035176,GO:0042297,GO:0071625	axolemma|cell surface|dendrite|early endosome|Golgi apparatus|integral component of membrane|juxtaparanode region of axon|membrane|neuronal cell body|paranodal junction|paranode region of axon|plasma membrane|synaptic membrane|voltage-gated potassium channel complex|enzyme binding|ion channel binding|protease binding|adult behavior|cell adhesion|clustering of voltage-gated potassium channels|lear…
COL11A1	1	1	0	0	PREDICTED: LOW QUALITY PROTEIN: collagen alpha-1(XI) chain [Bos mutus]	GO:0005592,GO:0062023,GO:0005788,GO:0031012,GO:0005576,GO:0005615,GO:0050840,GO:0005201,GO:0030020,GO:1904399,GO:0008201,GO:0046872,GO:0030674,GO:0001502,GO:0002063,GO:0030199,GO:0050910,GO:0048704,GO:0035987,GO:0030198,GO:0042472,GO:0001503,GO:0006029,GO:0007605,GO:0035989,GO:0055010,GO:0007601	collagen type XI trimer|collagen-containing extracellular matrix|endoplasmic reticulum lumen|extracellular matrix|extracellular region|extracellular space|extracellular matrix binding|extracellular matrix structural constituent|extracellular matrix structural constituent conferring tensile strength|heparan sulfate binding|heparin binding|metal ion binding|protein binding, bridging|cartilage conde…	bom04974	Protein digestion and absorption
COL12A1	1	0	0	0	PREDICTED: LOW QUALITY PROTEIN: collagen alpha-1(XII) chain [Bos mutus]	GO:0005595,GO:0062023,GO:0005788,GO:0070062,GO:0031012,GO:0005576,GO:0005615,GO:1903561,GO:0030020,GO:0007155,GO:0030199,GO:0035987,GO:0003429,GO:0001501	collagen type XII trimer|collagen-containing extracellular matrix|endoplasmic reticulum lumen|extracellular exosome|extracellular matrix|extracellular region|extracellular space|extracellular vesicle|extracellular matrix structural constituent conferring tensile strength|cell adhesion|collagen fibril organization|endodermal cell differentiation|growth plate cartilage chondrocyte morphogenesis|ske…	bom04974	Protein digestion and absorption
COL13A1	1	1	0	0	PREDICTED: collagen alpha-1(XIII) chain, partial [Bos mutus]	GO:0005911,GO:0005600,GO:0062023,GO:0005788,GO:0031012,GO:0005576,GO:0005615,GO:0005886,GO:0045211,GO:0005201,GO:0030020,GO:0008201,GO:0030154,GO:0098609,GO:0007160,GO:0030574,GO:0001958,GO:0030198,GO:0001763	cell-cell junction|collagen type XIII trimer|collagen-containing extracellular matrix|endoplasmic reticulum lumen|extracellular matrix|extracellular region|extracellular space|plasma membrane|postsynaptic membrane|extracellular matrix structural constituent|extracellular matrix structural constituent conferring tensile strength|heparin binding|cell differentiation|cell-cell adhesion|cell-matrix a…	bom04974	Protein digestion and absorption
COL14A1	1	1	0	0	PREDICTED: collagen alpha-1(XIV) chain, partial [Bos mutus]	GO:0005581,GO:0005596,GO:0062023,GO:0005788,GO:0031012,GO:0005576,GO:0005615,GO:0005518,GO:0005201,GO:0030020,GO:0030674,GO:0003723,GO:0098609,GO:0030199,GO:0030198,GO:0003429	collagen trimer|collagen type XIV trimer|collagen-containing extracellular matrix|endoplasmic reticulum lumen|extracellular matrix|extracellular region|extracellular space|collagen binding|extracellular matrix structural constituent|extracellular matrix structural constituent conferring tensile strength|protein binding, bridging|RNA binding|cell-cell adhesion|collagen fibril organization|extracel…	bom04974	Protein digestion and absorption
COL16A1	1	1	0	0	PREDICTED: collagen alpha-1(XVI) chain [Bos mutus]			bom04974	Protein digestion and absorption
COL17A1	1	1	0	1	PREDICTED: collagen alpha-1(XVII) chain [Bos mutus]	GO:0005604,GO:0005581,GO:0031012,GO:0005615,GO:0030056,GO:0016021,GO:0005201,GO:0030198,GO:0031581	basement membrane|collagen trimer|extracellular matrix|extracellular space|hemidesmosome|integral component of membrane|extracellular matrix structural constituent|extracellular matrix organization|hemidesmosome assembly	bom04974	Protein digestion and absorption
COL1A1	1	1	0	0	PREDICTED: collagen alpha-1(I) chain [Bos mutus]	GO:0005584,GO:0005737,GO:0031012,GO:0005615,GO:0005201,GO:0042802,GO:0046872,GO:0048407,GO:0002020,GO:0001568,GO:0060346,GO:0060351,GO:0071230,GO:0071260,GO:0032964,GO:0030199,GO:0038063,GO:0048706,GO:0001958,GO:0030198,GO:0060325,GO:0001957,GO:0010812,GO:0001503,GO:0001649,GO:0090263,GO:0030335,GO:0010718,GO:0045893,GO:0070208,GO:0034504,GO:0015031,GO:0009612,GO:0007605,GO:0001501,GO:0043588,GO:…	collagen type I trimer|cytoplasm|extracellular matrix|extracellular space|extracellular matrix structural constituent|identical protein binding|metal ion binding|platelet-derived growth factor binding|protease binding|blood vessel development|bone trabecula formation|cartilage development involved in endochondral bone morphogenesis|cellular response to amino acid stimulus|cellular response to mec…	bom04151,bom04510,bom04512,bom04611,bom04926,bom04933,bom04974,bom05146,bom05165,bom05205,bom05415	PI3K-Akt signaling pathway|Focal adhesion|ECM-receptor interaction|Platelet activation|Relaxin signaling pathway|AGE-RAGE signaling pathway in diabetic complications|Protein digestion and absorption|Amoebiasis|Human papillomavirus infection|Proteoglycans in cancer|Diabetic cardiomyopathy
COL1A2	1	1	0	0	PREDICTED: collagen alpha-2(I) chain [Bos mutus]	GO:0005584,GO:0005783,GO:0031012,GO:0005615,GO:0005201,GO:0042802,GO:0046872,GO:0048407,GO:0002020,GO:0030674,GO:0046332,GO:0001568,GO:0071230,GO:0030199,GO:0030198,GO:0070208,GO:0008217,GO:0007266,GO:0001501,GO:0043589,GO:0007179	collagen type I trimer|endoplasmic reticulum|extracellular matrix|extracellular space|extracellular matrix structural constituent|identical protein binding|metal ion binding|platelet-derived growth factor binding|protease binding|protein binding, bridging|SMAD binding|blood vessel development|cellular response to amino acid stimulus|collagen fibril organization|extracellular matrix organization|p…	bom04151,bom04510,bom04512,bom04611,bom04926,bom04933,bom04974,bom05146,bom05165,bom05205,bom05415	PI3K-Akt signaling pathway|Focal adhesion|ECM-receptor interaction|Platelet activation|Relaxin signaling pathway|AGE-RAGE signaling pathway in diabetic complications|Protein digestion and absorption|Amoebiasis|Human papillomavirus infection|Proteoglycans in cancer|Diabetic cardiomyopathy
COL21A1	1	1	0	0	PREDICTED: collagen alpha-1(XXI) chain [Bos mutus]	GO:0005581,GO:0062023,GO:0005829,GO:0005788,GO:0031012,GO:0005576,GO:0005615,GO:0030020,GO:0003429	collagen trimer|collagen-containing extracellular matrix|cytosol|endoplasmic reticulum lumen|extracellular matrix|extracellular region|extracellular space|extracellular matrix structural constituent conferring tensile strength|growth plate cartilage chondrocyte morphogenesis	bom04974	Protein digestion and absorption
COL23A1	1	0	0	0	alternative protein COL23A1 [Homo sapiens]	GO:0009986,GO:0005581,GO:0062023,GO:0031012,GO:0005576,GO:0005615,GO:0016021,GO:0005886,GO:0005201,GO:0030020,GO:0008201,GO:0042802,GO:0042803,GO:0001525,GO:0001886,GO:0030198,GO:0070207	cell surface|collagen trimer|collagen-containing extracellular matrix|extracellular matrix|extracellular region|extracellular space|integral component of membrane|plasma membrane|extracellular matrix structural constituent|extracellular matrix structural constituent conferring tensile strength|heparin binding|identical protein binding|protein homodimerization activity|angiogenesis|endothelial cel…	bom04974	Protein digestion and absorption
COL2A1	0	1	0	0	hypothetical protein DBR06_SOUSAS1110074, partial [Sousa chinensis]	GO:0005604,GO:0005581,GO:0005585,GO:0005737,GO:0031012,GO:0005576,GO:0005615,GO:0005201,GO:0042802,GO:0046872,GO:0042289,GO:0048407,GO:0097065,GO:0001502,GO:0060351,GO:0071773,GO:0007417,GO:0002062,GO:0030199,GO:0060272,GO:0001958,GO:0030198,GO:0003007,GO:0042472,GO:0060174,GO:2001240,GO:0030903,GO:0071599,GO:0006029,GO:0010468,GO:0060021,GO:0007605,GO:0001501,GO:0001894,GO:0007601	basement membrane|collagen trimer|collagen type II trimer|cytoplasm|extracellular matrix|extracellular region|extracellular space|extracellular matrix structural constituent|identical protein binding|metal ion binding|MHC class II protein binding|platelet-derived growth factor binding|anterior head development|cartilage condensation|cartilage development involved in endochondral bone morphogenesi…	bom04151,bom04510,bom04512,bom04974,bom05165	PI3K-Akt signaling pathway|Focal adhesion|ECM-receptor interaction|Protein digestion and absorption|Human papillomavirus infection
COL3A1	1	1	0	0	collagen alpha-1(III) chain precursor [Bos taurus]			bom04611,bom04926,bom04933,bom04974,bom05146,bom05415	Platelet activation|Relaxin signaling pathway|AGE-RAGE signaling pathway in diabetic complications|Protein digestion and absorption|Amoebiasis|Diabetic cardiomyopathy
COL4A1	1	1	0	0	Chain A, Type Iv Collagen Noncollagenous Domain- Alpha1 [Bos taurus]	GO:0005587,GO:0030020,GO:0048407,GO:0071711,GO:0007420,GO:0001569,GO:0071230,GO:0038063,GO:0007528,GO:0061333,GO:0061304	collagen type IV trimer|extracellular matrix structural constituent conferring tensile strength|platelet-derived growth factor binding|basement membrane organization|brain development|branching involved in blood vessel morphogenesis|cellular response to amino acid stimulus|collagen-activated tyrosine kinase receptor signaling pathway|neuromuscular junction development|renal tubule morphogenesis|r…	bom04151,bom04510,bom04512,bom04926,bom04933,bom04974,bom05146,bom05165,bom05200,bom05222	PI3K-Akt signaling pathway|Focal adhesion|ECM-receptor interaction|Relaxin signaling pathway|AGE-RAGE signaling pathway in diabetic complications|Protein digestion and absorption|Amoebiasis|Human papillomavirus infection|Pathways in cancer|Small cell lung cancer
COL4A2	1	1	0	0	PREDICTED: collagen alpha-2(IV) chain, partial [Bos mutus]	GO:0005604,GO:0005581,GO:0005201	basement membrane|collagen trimer|extracellular matrix structural constituent	bom04151,bom04510,bom04512,bom04926,bom04933,bom04974,bom05146,bom05165,bom05200,bom05222	PI3K-Akt signaling pathway|Focal adhesion|ECM-receptor interaction|Relaxin signaling pathway|AGE-RAGE signaling pathway in diabetic complications|Protein digestion and absorption|Amoebiasis|Human papillomavirus infection|Pathways in cancer|Small cell lung cancer
COL4A5	1	1	0	0	collagen alpha-5(IV) chain isoform X1 [Bos indicus x Bos taurus]			bom04151,bom04510,bom04512,bom04926,bom04933,bom04974,bom05146,bom05165,bom05200,bom05222	PI3K-Akt signaling pathway|Focal adhesion|ECM-receptor interaction|Relaxin signaling pathway|AGE-RAGE signaling pathway in diabetic complications|Protein digestion and absorption|Amoebiasis|Human papillomavirus infection|Pathways in cancer|Small cell lung cancer
COL4A6	1	1	0	0	collagen alpha-6(IV) chain isoform X2 [Balaenoptera acutorostrata scammoni]	GO:0005587,GO:0062023,GO:0005788,GO:0031012,GO:0005576,GO:0005615,GO:0005201,GO:0030020,GO:0007155,GO:0038063,GO:0030198	collagen type IV trimer|collagen-containing extracellular matrix|endoplasmic reticulum lumen|extracellular matrix|extracellular region|extracellular space|extracellular matrix structural constituent|extracellular matrix structural constituent conferring tensile strength|cell adhesion|collagen-activated tyrosine kinase receptor signaling pathway|extracellular matrix organization	bom04151,bom04510,bom04512,bom04926,bom04933,bom04974,bom05146,bom05165,bom05200,bom05222	PI3K-Akt signaling pathway|Focal adhesion|ECM-receptor interaction|Relaxin signaling pathway|AGE-RAGE signaling pathway in diabetic complications|Protein digestion and absorption|Amoebiasis|Human papillomavirus infection|Pathways in cancer|Small cell lung cancer
COL5A1	1	1	0	0	PREDICTED: LOW QUALITY PROTEIN: collagen alpha-1(V) chain [Bos mutus]	GO:0005604,GO:0005588,GO:0062023,GO:0005788,GO:0031012,GO:0005576,GO:0005615,GO:0005201,GO:0030020,GO:0008201,GO:0005178,GO:0046872,GO:0048407,GO:0043394,GO:0001568,GO:0007155,GO:0016477,GO:0032964,GO:0030199,GO:0030198,GO:0048592,GO:0003007,GO:0045112,GO:1903225,GO:0051128,GO:0043588,GO:0097435,GO:0035989,GO:0035313	basement membrane|collagen type V trimer|collagen-containing extracellular matrix|endoplasmic reticulum lumen|extracellular matrix|extracellular region|extracellular space|extracellular matrix structural constituent|extracellular matrix structural constituent conferring tensile strength|heparin binding|integrin binding|metal ion binding|platelet-derived growth factor binding|proteoglycan binding|…	bom04974	Protein digestion and absorption
COL5A2	1	1	0	0	PREDICTED: LOW QUALITY PROTEIN: collagen alpha-2(V) chain [Bos indicus]	GO:0005581,GO:0005588,GO:0062023,GO:0005788,GO:0031012,GO:0005576,GO:0005615,GO:0005201,GO:0030020,GO:0046872,GO:0046332,GO:0071230,GO:0030199,GO:0030198,GO:0048592,GO:1903225,GO:0030903,GO:0001503,GO:0001501,GO:0043588	collagen trimer|collagen type V trimer|collagen-containing extracellular matrix|endoplasmic reticulum lumen|extracellular matrix|extracellular region|extracellular space|extracellular matrix structural constituent|extracellular matrix structural constituent conferring tensile strength|metal ion binding|SMAD binding|cellular response to amino acid stimulus|collagen fibril organization|extracellula…	bom04974	Protein digestion and absorption
COL5A3	1	1	0	0	PREDICTED: LOW QUALITY PROTEIN: collagen alpha-3(V) chain [Bos mutus]	GO:0005588,GO:0062023,GO:0005788,GO:0031012,GO:0005576,GO:0005615,GO:0005518,GO:0005201,GO:0030020,GO:0008201,GO:0043394,GO:0007155,GO:0007160,GO:0030199,GO:0030198,GO:0043588	collagen type V trimer|collagen-containing extracellular matrix|endoplasmic reticulum lumen|extracellular matrix|extracellular region|extracellular space|collagen binding|extracellular matrix structural constituent|extracellular matrix structural constituent conferring tensile strength|heparin binding|proteoglycan binding|cell adhesion|cell-matrix adhesion|collagen fibril organization|extracellul…	bom04974	Protein digestion and absorption
COL6A1	1	1	0	0	PREDICTED: collagen alpha-1(VI) chain [Bos mutus]	GO:0005589,GO:0062023,GO:0005788,GO:0070062,GO:0031012,GO:0005576,GO:0005615,GO:0005765,GO:0016020,GO:0032991,GO:0042383,GO:0030020,GO:0048407,GO:0007155,GO:0071230,GO:0035987,GO:0030198,GO:0003429,GO:0001649,GO:0070208	collagen type VI trimer|collagen-containing extracellular matrix|endoplasmic reticulum lumen|extracellular exosome|extracellular matrix|extracellular region|extracellular space|lysosomal membrane|membrane|protein-containing complex|sarcolemma|extracellular matrix structural constituent conferring tensile strength|platelet-derived growth factor binding|cell adhesion|cellular response to amino acid…	bom04151,bom04510,bom04512,bom04974,bom05165	PI3K-Akt signaling pathway|Focal adhesion|ECM-receptor interaction|Protein digestion and absorption|Human papillomavirus infection
COL6A2	1	1	0	0	PREDICTED: collagen alpha-2(VI) chain [Bos mutus]	GO:0005581,GO:0062023,GO:0031012,GO:0005576,GO:0005615,GO:0032991,GO:0042383,GO:0030020,GO:0007155,GO:0003429,GO:0070208,GO:0009749	collagen trimer|collagen-containing extracellular matrix|extracellular matrix|extracellular region|extracellular space|protein-containing complex|sarcolemma|extracellular matrix structural constituent conferring tensile strength|cell adhesion|growth plate cartilage chondrocyte morphogenesis|protein heterotrimerization|response to glucose	bom04151,bom04510,bom04512,bom04974,bom05165	PI3K-Akt signaling pathway|Focal adhesion|ECM-receptor interaction|Protein digestion and absorption|Human papillomavirus infection
COL6A6	1	1	0	0	PREDICTED: collagen alpha-6(VI) chain [Bos mutus]	GO:0005581,GO:0062023,GO:0031012,GO:0005576,GO:0030020,GO:0007155	collagen trimer|collagen-containing extracellular matrix|extracellular matrix|extracellular region|extracellular matrix structural constituent conferring tensile strength|cell adhesion	bom04151,bom04510,bom04512,bom04974,bom05165	PI3K-Akt signaling pathway|Focal adhesion|ECM-receptor interaction|Protein digestion and absorption|Human papillomavirus infection
COL7A1	1	1	0	1	PREDICTED: collagen alpha-1(VII) chain [Bos mutus]	GO:0005604,GO:0005590,GO:0062023,GO:0030134,GO:0005788,GO:0033116,GO:0031012,GO:0005576,GO:0005615,GO:0000139,GO:0030020,GO:0004867,GO:0007155,GO:0048208,GO:0035987,GO:0008544,GO:0006888,GO:0030198,GO:0003429	basement membrane|collagen type VII trimer|collagen-containing extracellular matrix|COPII-coated ER to Golgi transport vesicle|endoplasmic reticulum lumen|endoplasmic reticulum-Golgi intermediate compartment membrane|extracellular matrix|extracellular region|extracellular space|Golgi membrane|extracellular matrix structural constituent conferring tensile strength|serine-type endopeptidase inhibit…	bom04974	Protein digestion and absorption
COL9A1	0	1	0	0	PREDICTED: collagen alpha-1(IX) chain [Bos indicus]	GO:0005594,GO:0005788,GO:0031012,GO:0005576,GO:0005615,GO:0005201,GO:0030020,GO:0046872,GO:0009887,GO:0030198	collagen type IX trimer|endoplasmic reticulum lumen|extracellular matrix|extracellular region|extracellular space|extracellular matrix structural constituent|extracellular matrix structural constituent conferring tensile strength|metal ion binding|animal organ morphogenesis|extracellular matrix organization	bom04151,bom04510,bom04512,bom04974,bom05165	PI3K-Akt signaling pathway|Focal adhesion|ECM-receptor interaction|Protein digestion and absorption|Human papillomavirus infection
COL9A3	1	1	0	0	Collagen alpha-3 chain [Camelus dromedarius]	GO:0005594,GO:0005788,GO:0031012,GO:0005576,GO:0005615,GO:0005201,GO:0030020,GO:0030198,GO:0008585,GO:0008584	collagen type IX trimer|endoplasmic reticulum lumen|extracellular matrix|extracellular region|extracellular space|extracellular matrix structural constituent|extracellular matrix structural constituent conferring tensile strength|extracellular matrix organization|female gonad development|male gonad development	bom04151,bom04510,bom04512,bom04974,bom05165	PI3K-Akt signaling pathway|Focal adhesion|ECM-receptor interaction|Protein digestion and absorption|Human papillomavirus infection
COLEC11	0	1	0	0	hypothetical protein [Bos mutus]	GO:0005581,GO:0005615,GO:0005509,GO:0120153,GO:0003677,GO:0042806,GO:0005537,GO:0048029,GO:0070492,GO:0019730,GO:0001867,GO:0032502,GO:0007275	collagen trimer|extracellular space|calcium ion binding|calcium-dependent carbohydrate binding|DNA binding|fucose binding|mannose binding|monosaccharide binding|oligosaccharide binding|antimicrobial humoral response|complement activation, lectin pathway|developmental process|multicellular organism development	bom04145	Phagosome
COLEC12	1	1	0	0	collectin-12 [Bos taurus]	GO:0005581,GO:0016021,GO:0030246,GO:0030169,GO:0046872,GO:0008329,GO:0004888,GO:0071360,GO:0006955,GO:0006910,GO:0060355,GO:0034138	collagen trimer|integral component of membrane|carbohydrate binding|low-density lipoprotein particle binding|metal ion binding|signaling pattern recognition receptor activity|transmembrane signaling receptor activity|cellular response to exogenous dsRNA|immune response|phagocytosis, recognition|positive regulation of cell adhesion molecule production|toll-like receptor 3 signaling pathway	bom04145	Phagosome
COLQ	1	1	0	0	PREDICTED: acetylcholinesterase collagenic tail peptide isoform X2 [Bos mutus]	GO:0005604,GO:0030054,GO:0005581,GO:0031012,GO:0005615,GO:0031594,GO:0005886,GO:0043083,GO:0005201,GO:0008201,GO:0001507,GO:0090150,GO:0030198,GO:0008582,GO:0071340	basement membrane|cell junction|collagen trimer|extracellular matrix|extracellular space|neuromuscular junction|plasma membrane|synaptic cleft|extracellular matrix structural constituent|heparin binding|acetylcholine catabolic process in synaptic cleft|establishment of protein localization to membrane|extracellular matrix organization|regulation of synaptic growth at neuromuscular junction|skelet…
COPZ2	0	1	0	0	PREDICTED: coatomer subunit zeta-2 isoform X1 [Bos mutus]	GO:0005801,GO:0030126,GO:0005829,GO:0005789,GO:0033116,GO:0000139,GO:0030133,GO:0006888,GO:0006891,GO:0006886,GO:0006890	cis-Golgi network|COPI vesicle coat|cytosol|endoplasmic reticulum membrane|endoplasmic reticulum-Golgi intermediate compartment membrane|Golgi membrane|transport vesicle|ER to Golgi vesicle-mediated transport|intra-Golgi vesicle-mediated transport|intracellular protein transport|retrograde vesicle-mediated transport, Golgi to ER
COQ10B	0	0	0	1	PREDICTED: coenzyme Q-binding protein COQ10 homolog B, mitochondrial [Bos mutus]	GO:0005743,GO:0005739,GO:0048039,GO:0045333,GO:0006744	mitochondrial inner membrane|mitochondrion|ubiquinone binding|cellular respiration|ubiquinone biosynthetic process
COQ2	0	1	0	0	PREDICTED: 4-hydroxybenzoate polyprenyltransferase, mitochondrial [Bos mutus]	GO:0031305,GO:0005739,GO:0002083,GO:0047293,GO:0016765,GO:0008299,GO:0006744	integral component of mitochondrial inner membrane|mitochondrion|4-hydroxybenzoate decaprenyltransferase activity|4-hydroxybenzoate nonaprenyltransferase activity|transferase activity, transferring alkyl or aryl (other than methyl) groups|isoprenoid biosynthetic process|ubiquinone biosynthetic process	bom00130	Ubiquinone and other terpenoid-quinone biosynthesis
COQ6	1	1	0	0	PREDICTED: LOW QUALITY PROTEIN: ubiquinone biosynthesis monooxygenase COQ6, mitochondrial [Bos mutus]	GO:0042995,GO:0031314,GO:0005794,GO:0005739,GO:0071949,GO:0016709,GO:0016712,GO:0006744	cell projection|extrinsic component of mitochondrial inner membrane|Golgi apparatus|mitochondrion|FAD binding|oxidoreductase activity,acting on paired donors, with incorporation or reduction of molecular oxygen, NAD(P)H as one donor, and incorporation of one atom of oxygen|oxidoreductase activity, acting on paired donors, with incorporation or reduction of molecular oxygen, reduced flavin or flav…	bom00130	Ubiquinone and other terpenoid-quinone biosynthesis
CORO2B	1	1	1	1	coronin-2B isoform X2 [Phocoena sinus]	GO:0015629,GO:0005737,GO:0016020,GO:0003779,GO:0051015,GO:0030036	actin cytoskeleton|cytoplasm|membrane|actin binding|actin filament binding|actin cytoskeleton organization
CPE	0	1	0	0	PREDICTED: carboxypeptidase E isoform X1 [Bos mutus]	GO:0005615,GO:0005794,GO:0043025,GO:0030141,GO:0097060,GO:0030658,GO:0050839,GO:0004181,GO:0042043,GO:0008270,GO:0003214,GO:0030070,GO:0006518,GO:0072657,GO:0016485,GO:0016055	extracellular space|Golgi apparatus|neuronal cell body|secretory granule|synaptic membrane|transport vesicle membrane|cell adhesion molecule binding|metallocarboxypeptidase activity|neurexin family protein binding|zinc ion binding|cardiac left ventricle morphogenesis|insulin processing|peptide metabolic process|protein localization to membrane|protein processing|Wnt signaling pathway	bom04940	Type I diabetes mellitus
CPEB1	0	1	0	0	cytoplasmic polyadenylation element-binding protein 1 isoform X1 [Bos indicus x Bos taurus]	GO:0030054,GO:0005737,GO:0005829,GO:0030425,GO:1990124,GO:0043005,GO:0005654,GO:0005634,GO:0000932,GO:0014069,GO:0045211,GO:0045202,GO:0046872,GO:0035925,GO:0003730,GO:0043022,GO:0008135,GO:0000900,GO:0071230,GO:0071456,GO:0032869,GO:0006397,GO:2000766,GO:1900365	cell junction|cytoplasm|cytosol|dendrite|messenger ribonucleoprotein complex|neuron projection|nucleoplasm|nucleus|P-body|postsynaptic density|postsynaptic membrane|synapse|metal ion binding|mRNA 3'-UTR AU-rich region binding|mRNA 3'-UTR binding|ribosome binding|translation factor activity, RNA binding|translation repressor activity, mRNA regulatory element binding|cellular response to amino acid…	bom04114,bom04914	Oocyte meiosis|Progesterone-mediated oocyte maturation
CPEB3	1	1	0	0	PREDICTED: LOW QUALITY PROTEIN: cytoplasmic polyadenylation element-binding protein 3 [Bos mutus]			bom04114,bom04914	Oocyte meiosis|Progesterone-mediated oocyte maturation
CPEB4	1	1	1	1	cytoplasmic polyadenylation element-binding protein 4 isoform X2 [Octodon degus]	GO:0030054,GO:0005737,GO:0030425,GO:0043197,GO:0005783,GO:0030426,GO:1990124,GO:0043005,GO:0005634,GO:0048471,GO:0098794,GO:0014069,GO:0045211,GO:0045202,GO:0046872,GO:0003730,GO:0043022,GO:0003723,GO:0008135,GO:0000900,GO:0071230,GO:0036294,GO:0042149,GO:0035235,GO:2000766,GO:0043524,GO:0002931	cell junction|cytoplasm|dendrite|dendritic spine|endoplasmic reticulum|growth cone|messenger ribonucleoprotein complex|neuron projection|nucleus|perinuclear region of cytoplasm|postsynapse|postsynaptic density|postsynaptic membrane|synapse|metal ion binding|mRNA 3'-UTR binding|ribosome binding|RNA binding|translation factor activity, RNA binding|translation repressor activity, mRNA regulatory ele…	bom04114,bom04914	Oocyte meiosis|Progesterone-mediated oocyte maturation
CPED1	0	0	0	1	PREDICTED: cadherin-like and PC-esterase domain-containing protein 1 [Bos mutus]	GO:0005783	endoplasmic reticulum
CPLX2	1	1	0	0	complexin-2 [Trichechus manatus latirostris]	GO:0044305,GO:0005829,GO:0098978,GO:0042629,GO:0031201,GO:0043195,GO:0000149,GO:0017075,GO:0043303,GO:0031915,GO:0046928,GO:0031630,GO:0016079	calyx of Held|cytosol|glutamatergic synapse|mast cell granule|SNARE complex|terminal bouton|SNARE binding|syntaxin-1 binding|mast cell degranulation|positive regulation of synaptic plasticity|regulation of neurotransmitter secretion|regulation of synaptic vesicle fusion to presynaptic active zone membrane|synaptic vesicle exocytosis	bom04721	Synaptic vesicle cycle
CPM	0	0	1	0	PREDICTED: carboxypeptidase M [Bos mutus]	GO:0031225,GO:0009986,GO:0070062,GO:0005576,GO:0005615,GO:0005886,GO:0004180,GO:0004181,GO:0008270,GO:0009653,GO:0006518,GO:0016485	anchored component of membrane|cell surface|extracellular exosome|extracellular region|extracellular space|plasma membrane|carboxypeptidase activity|metallocarboxypeptidase activity|zinc ion binding|anatomical structure morphogenesis|peptide metabolic process|protein processing
CPNE2	1	1	0	0	PREDICTED: copine-2 [Bos mutus]	GO:0005737,GO:0070062,GO:0005634,GO:0005886,GO:0005544,GO:0071277	cytoplasm|extracellular exosome|nucleus|plasma membrane|calcium-dependent phospholipid binding|cellular response to calcium ion
CPNE5	1	1	0	0	copine-5 [Bos taurus]	GO:0070062,GO:0043005,GO:0043204,GO:0005886,GO:0005544,GO:0071277,GO:1903861	extracellular exosome|neuron projection|perikaryon|plasma membrane|calcium-dependent phospholipid binding|cellular response to calcium ion|positive regulation of dendrite extension
CPNE8	0	1	0	0	PREDICTED: copine-8 [Bos mutus]	GO:0005886,GO:0005544,GO:0071277	plasma membrane|calcium-dependent phospholipid binding|cellular response to calcium ion
CPPED1	1	1	0	1	PREDICTED: LOW QUALITY PROTEIN: serine/threonine-protein phosphatase CPPED1 [Bos mutus]	GO:0005737,GO:0046872,GO:0004721	cytoplasm|metal ion binding|phosphoprotein phosphatase activity
CPT1C	1	0	0	0	PREDICTED: carnitine O-palmitoyltransferase 1, brain isoform [Bos mutus]	GO:0032281,GO:0030424,GO:0030054,GO:0030425,GO:0005783,GO:0098978,GO:0030176,GO:0005741,GO:0005739,GO:0098794,GO:0004095,GO:0009437,GO:0006635,GO:0015909,GO:0099072	AMPA glutamate receptor complex|axon|cell junction|dendrite|endoplasmic reticulum|glutamatergic synapse|integral component of endoplasmic reticulum membrane|mitochondrial outer membrane|mitochondrion|postsynapse|carnitine O-palmitoyltransferase activity|carnitine metabolic process|fatty acid beta-oxidation|long-chain fatty acid transport|regulation of postsynaptic membrane neurotransmitter recept…	bom00071,bom03320,bom04152,bom04714,bom04920,bom04922	Fatty acid degradation|PPAR signaling pathway|AMPK signaling pathway|Thermogenesis|Adipocytokine signaling pathway|Glucagon signaling pathway
CPT2	1	1	1	0	PREDICTED: carnitine O-palmitoyltransferase 2, mitochondrial isoform X2 [Bos mutus]	GO:0005743,GO:0005739,GO:0004095,GO:0006635	mitochondrial inner membrane|mitochondrion|carnitine O-palmitoyltransferase activity|fatty acid beta-oxidation	bom00071,bom03320,bom04714,bom05415	Fatty acid degradation|PPAR signaling pathway|Thermogenesis|Diabetic cardiomyopathy
CPXM1	1	1	0	0	probable carboxypeptidase X1 precursor [Bos taurus]	GO:0005615,GO:0004181,GO:0008270,GO:0006518,GO:0016485	extracellular space|metallocarboxypeptidase activity|zinc ion binding|peptide metabolic process|protein processing
CPZ	1	1	0	0	hypothetical protein [Bos mutus]	GO:0005615,GO:0004181,GO:0008270,GO:0006518,GO:0016485,GO:0006508,GO:0016055	extracellular space|metallocarboxypeptidase activity|zinc ion binding|peptide metabolic process|protein processing|proteolysis|Wnt signaling pathway
CR2	0	1	0	1	Complement receptor type 2, partial [Bos mutus]	GO:0070062,GO:0016021,GO:0005886,GO:0043235,GO:0001848,GO:0004875,GO:0003677,GO:0042803,GO:0004888,GO:0001618,GO:0030183,GO:0042100,GO:0006958,GO:0006955,GO:0045087,GO:0030449	extracellular exosome|integral component of membrane|plasma membrane|receptor complex|complement binding|complement receptor activity|DNA binding|protein homodimerization activity|transmembrane signaling receptor activity|virus receptor activity|B cell differentiation|B cell proliferation|complement activation, classical pathway|immune response|innate immune response|regulation of complement acti…	bom04610,bom04640,bom04662,bom05169	Complement and coagulation cascades|Hematopoietic cell lineage|B cell receptor signaling pathway|Epstein-Barr virus infection
CRABP1	1	1	0	0	hypothetical protein Celaphus_00015315 [Cervus elaphus hippelaphus]	GO:0005737,GO:0032991,GO:0042802,GO:0016918,GO:0001972,GO:0019841,GO:0051260,GO:0034653	cytoplasm|protein-containing complex|identical protein binding|retinal binding|retinoic acid binding|retinol binding|protein homooligomerization|retinoic acid catabolic process
CRABP2	1	0	0	0	unnamed protein product, partial [Gulo gulo]	GO:0005737,GO:0005783,GO:0005634,GO:0016918,GO:0001972,GO:0019841,GO:0048385	cytoplasm|endoplasmic reticulum|nucleus|retinal binding|retinoic acid binding|retinol binding|regulation of retinoic acid receptor signaling pathway
CRB3	0	1	0	0	PREDICTED: protein crumbs homolog 3 isoform X2 [Manis javanica]	GO:0016324,GO:0005923,GO:0030054,GO:0070062,GO:0016021,GO:0005886,GO:0032991,GO:0019904,GO:0017124,GO:0070830,GO:0072659	apical plasma membrane|bicellular tight junction|cell junction|extracellular exosome|integral component of membrane|plasma membrane|protein-containing complex|protein domain specific binding|SH3 domain binding|bicellular tight junction assembly|protein localization to plasma membrane	bom04530,bom05165	Tight junction|Human papillomavirus infection
CREB3L1	1	1	1	1	PREDICTED: cyclic AMP-responsive element-binding protein 3-like protein 1 [Bos mutus]	GO:0005783,GO:0005789,GO:0016021,GO:0016020,GO:0000790,GO:0005634,GO:0035497,GO:0003682,GO:0000981,GO:0001227,GO:0001077,GO:0046332,GO:0044212,GO:0030968,GO:0070278,GO:0007275,GO:1902236,GO:0040037,GO:0010629,GO:1903671,GO:0045892,GO:0001649,GO:0032967,GO:1990440	endoplasmic reticulum|endoplasmic reticulum membrane|integral component of membrane|membrane|nuclear chromatin|nucleus|cAMP response element binding|chromatin binding|DNA-binding transcription factor activity, RNA polymerase II-specific|DNA-binding transcription repressor activity, RNA polymerase II-specific|proximal promoter DNA-binding transcription activator activity, RNA polymerase II-specifi…	bom04022,bom04024,bom04151,bom04152,bom04211,bom04261,bom04668,bom04714,bom04725,bom04728,bom04911,bom04915,bom04916,bom04918,bom04922,bom04925,bom04926,bom04927,bom04928,bom04931,bom04934,bom04935,bom04962,bom05016,bom05020,bom05030,bom05031,bom05034,bom05161,bom05163,bom05165,bom05166,bom05203,bom05207,bom05215	cGMP-PKG signaling pathway|cAMP signaling pathway|PI3K-Akt signaling pathway|AMPK signaling pathway|Longevity regulating pathway|Adrenergic signaling in cardiomyocytes|TNF signaling pathway|Thermogenesis|Cholinergic synapse|Dopaminergic synapse|Insulin secretion|Estrogen signaling pathway|Melanogenesis|Thyroid hormone synthesis|Glucagon signaling pathway|Aldosterone synthesis and secretion|Relaxi…
CREBL2	1	1	0	0	cAMP-responsive element-binding protein-like 2 [Bos taurus]	GO:0016604,GO:0005634,GO:0003677,GO:0003700,GO:0030154,GO:0045600,GO:0046326,GO:0046889,GO:0033138,GO:0045893,GO:0050821,GO:0016032	nuclear body|nucleus|DNA binding|DNA-binding transcription factor activity|cell differentiation|positive regulation of fat cell differentiation|positive regulation of glucose import|positive regulation of lipid biosynthetic process|positive regulation of peptidyl-serine phosphorylation|positive regulation of transcription, DNA-templated|protein stabilization|viral process
CREBZF	0	0	0	1	PREDICTED: CREB/ATF bZIP transcription factor isoform X1 [Bison bison bison]	GO:0005739,GO:0005634,GO:0003700,GO:0042802,GO:0045814,GO:0045892,GO:0051090,GO:0009615,GO:0006351	mitochondrion|nucleus|DNA-binding transcription factor activity|identical protein binding|negative regulation of gene expression, epigenetic|negative regulation of transcription, DNA-templated|regulation of DNA-binding transcription factor activity|response to virus|transcription, DNA-templated
CRISPLD1	1	1	0	0	hypothetical protein [Bos mutus]	GO:0070062,GO:0005615,GO:0060325	extracellular exosome|extracellular space|face morphogenesis
CRISPLD2	1	1	1	1	PREDICTED: cysteine-rich secretory protein LCCL domain-containing 2 [Bos mutus]	GO:0031012,GO:0005615,GO:0030133,GO:0005539,GO:0008201,GO:0030198,GO:0060325	extracellular matrix|extracellular space|transport vesicle|glycosaminoglycan binding|heparin binding|extracellular matrix organization|face morphogenesis
CRLF1	0	1	0	1	PREDICTED: cytokine receptor-like factor 1 [Bos mutus]	GO:0097058,GO:0009897,GO:0005615,GO:0043235,GO:0005127,GO:0005125,GO:0019955,GO:0004896,GO:0046982,GO:2000672,GO:0043524,GO:0008284,GO:0042531,GO:0001657	CRLF-CLCF1 complex|external side of plasma membrane|extracellular space|receptor complex|ciliary neurotrophic factor receptor binding|cytokine activity|cytokine binding|cytokine receptor activity|protein heterodimerization activity|negative regulation of motor neuron apoptotic process|negative regulation of neuron apoptotic process|positive regulation of cell proliferation|positive regulation of …
CRMP1	1	1	1	0	hypothetical protein [Bos mutus]	GO:0005813,GO:0005829,GO:0030496,GO:0005819,GO:0031005,GO:0016810,GO:0007411,GO:0000226,GO:1904530,GO:0010977,GO:0007399,GO:0006139	centrosome|cytosol|midbody|spindle|filamin binding|hydrolase activity, acting on carbon-nitrogen (but not peptide) bonds|axon guidance|microtubule cytoskeleton organization|negative regulation of actin filament binding|negative regulation of neuron projection development|nervous system development|nucleobase-containing compound metabolic process
CRNN	1	1	0	1	PREDICTED: cornulin [Bos mutus]	GO:0005737,GO:0070062,GO:0016020,GO:0005509,GO:0046914,GO:0098609,GO:0009408	cytoplasm|extracellular exosome|membrane|calcium ion binding|transition metal ion binding|cell-cell adhesion|response to heat
CROT	1	1	0	1	hypothetical protein [Bos mutus]	GO:0005777,GO:0008458,GO:0009437,GO:0015936,GO:0006635,GO:0006631,GO:0006091,GO:0051791	peroxisome|carnitine O-octanoyltransferase activity|carnitine metabolic process|coenzyme A metabolic process|fatty acid beta-oxidation|fatty acid metabolic process|generation of precursor metabolites and energy|medium-chain fatty acid metabolic process	bom04146	Peroxisome
CRYAB	0	0	1	0	CRYAB protein, partial [Crocuta crocuta]	GO:0005737,GO:0005829,GO:0005739,GO:0043209,GO:0005634,GO:0005886,GO:0030018,GO:0001540,GO:0046872,GO:0042803,GO:0044877,GO:0005212,GO:0051082,GO:0060561,GO:0071480,GO:0002088,GO:0007517,GO:1905907,GO:0043066,GO:0043154,GO:0010629,GO:0032387,GO:0032463,GO:0051260,GO:0050821,GO:0042542,GO:0001666,GO:0007021	cytoplasm|cytosol|mitochondrion|myelin sheath|nucleus|plasma membrane|Z disc|amyloid-beta binding|metal ion binding|protein homodimerization activity|protein-containing complex binding|structural constituent of eye lens|unfolded protein binding|apoptotic process involved in morphogenesis|cellular response to gamma radiation|lens development in camera-type eye|muscle organ development|negative reg…	bom04141,bom04213	Protein processing in endoplasmic reticulum|Longevity regulating pathway - multiple species
CRYL1	0	1	0	1	Lambda-crystallin-like protein, partial [Bos mutus]	GO:0005829,GO:0003857,GO:0050104,GO:0070403,GO:0042803,GO:0006631	cytosol|3-hydroxyacyl-CoA dehydrogenase activity|L-gulonate 3-dehydrogenase activity|NAD+ binding|protein homodimerization activity|fatty acid metabolic process	bom00040	Pentose and glucuronate interconversions
CS	1	1	0	0	hypothetical protein DBR06_SOUSAS22610036, partial [Sousa chinensis]	GO:0005759,GO:0004108,GO:0005975,GO:0006099	mitochondrial matrix|citrate (Si)-synthase activity|carbohydrate metabolic process|tricarboxylic acid cycle	bom00020,bom00630	Citrate cycle (TCA cycle)|Glyoxylate and dicarboxylate metabolism
CSF1R	0	1	0	0	Macrophage colony-stimulating factor 1 receptor, partial [Bos mutus]	GO:0009986,GO:1990682,GO:0005737,GO:0005887,GO:0043235,GO:0005524,GO:0019955,GO:0005011,GO:0004714,GO:0004888,GO:0030154,GO:0071345,GO:0036006,GO:0006954,GO:0045087,GO:0043066,GO:0009968,GO:0030316,GO:0018108,GO:0046488,GO:0048015,GO:0030335,GO:0008284,GO:0070374,GO:0071902,GO:0042531,GO:0046777,GO:2000249,GO:0045124,GO:0008360,GO:0031529,GO:0007169	cell surface|CSF1-CSF1R complex|cytoplasm|integral component of plasma membrane|receptor complex|ATP binding|cytokine binding|macrophage colony-stimulating factor receptor activity|transmembrane receptor protein tyrosine kinase activity|transmembrane signaling receptor activity|cell differentiation|cellular response to cytokine stimulus|cellular response to macrophage colony-stimulating factor st…	bom04010,bom04014,bom04015,bom04060,bom04061,bom04151,bom04380,bom04640,bom05200,bom05202,bom05221	MAPK signaling pathway|Ras signaling pathway|Rap1 signaling pathway|Cytokine-cytokine receptor interaction|Viral protein interaction with cytokine and cytokine receptor|PI3K-Akt signaling pathway|Osteoclast differentiation|Hematopoietic cell lineage|Pathways in cancer|Transcriptional misregulation in cancer|Acute myeloid leukemia
CSN3	0	0	1	1	hypothetical protein [Bos mutus]
CST6	1	1	1	1	PREDICTED: cystatin-M [Bos mutus]
CST7	1	0	0	0	PREDICTED: cystatin-F [Bos mutus]	GO:0005737,GO:0005576,GO:0004869,GO:0004866,GO:0006955	cytoplasm|extracellular region|cysteine-type endopeptidase inhibitor activity|endopeptidase inhibitor activity|immune response
CSTA	1	1	0	0	Cystatin-A, partial [Bos mutus]	GO:0005829,GO:0004869	cytosol|cysteine-type endopeptidase inhibitor activity
CTGF	0	1	0	0	PREDICTED: connective tissue growth factor [Bos mutus]			bom04371,bom04390	Apelin signaling pathway|Hippo signaling pathway
CTHRC1	1	1	0	0	Collagen triple helix repeat-containing protein 1, partial [Bos mutus]	GO:0005581,GO:0005737,GO:0031012,GO:0005615,GO:0005109,GO:0017147,GO:0016477,GO:0090103,GO:0090177,GO:0060122,GO:0090090,GO:0043932,GO:0045669,GO:0033690,GO:0032092,GO:0060071	collagen trimer|cytoplasm|extracellular matrix|extracellular space|frizzled binding|Wnt-protein binding|cell migration|cochlea morphogenesis|establishment of planar polarity involved in neural tube closure|inner ear receptor cell stereocilium organization|negative regulation of canonical Wnt signaling pathway|ossification involved in bone remodeling|positive regulation of osteoblast differentiati…
CTLA4	1	0	0	0	cytotoxic T-lymphocyte protein 4 precursor [Bos taurus]	GO:0005887,GO:0002250	integral component of plasma membrane|adaptive immune response	bom04514,bom04660,bom05320,bom05323	Cell adhesion molecules|T cell receptor signaling pathway|Autoimmune thyroid disease|Rheumatoid arthritis
CTNNA2	1	1	0	0	catenin alpha-2 isoform X1 [Theropithecus gelada]	GO:0015629,GO:0005912,GO:0030424,GO:0016323,GO:0005913,GO:0005737,GO:0005829,GO:0098890,GO:0098888,GO:0098686,GO:0030027,GO:0005634,GO:0098688,GO:0099092,GO:0098831,GO:0051015,GO:0045296,GO:0042802,GO:0005200,GO:0007409,GO:0048854,GO:0098609,GO:0048813,GO:0098885,GO:0051149,GO:0060134,GO:0021942,GO:0051823	actin cytoskeleton|adherens junction|axon|basolateral plasma membrane|cell-cell adherens junction|cytoplasm|cytosol|extrinsic component of postsynaptic membrane|extrinsic component of presynaptic membrane|hippocampal mossy fiber to CA3 synapse|lamellipodium|nucleus|parallel fiber to Purkinje cell synapse|postsynaptic density, intracellular component|presynaptic active zone cytoplasmic component|a…	bom04390,bom04520,bom04670,bom05100,bom05200,bom05213,bom05226,bom05412	Hippo signaling pathway|Adherens junction|Leukocyte transendothelial migration|Bacterial invasion of epithelial cells|Pathways in cancer|Endometrial cancer|Gastric cancer|Arrhythmogenic right ventricular cardiomyopathy
CTNNAL1	0	1	0	0	TPA: catenin (cadherin-associated protein), alpha-like 1 [Bos taurus]	GO:0005938,GO:0005856,GO:0051015,GO:0045296,GO:0007155,GO:0007266	cell cortex|cytoskeleton|actin filament binding|cadherin binding|cell adhesion|Rho protein signal transduction
CTNS	0	1	0	0	cystinosin precursor [Bos taurus]	GO:0016021,GO:0045111,GO:0005770,GO:0005765,GO:0042470,GO:0005774,GO:0015184,GO:0007628,GO:0046034,GO:0007420,GO:0006749,GO:0007625,GO:0015811,GO:0002088,GO:0007616,GO:0042438,GO:0008542	integral component of membrane|intermediate filament cytoskeleton|late endosome|lysosomal membrane|melanosome|vacuolar membrane|L-cystine transmembrane transporter activity|adult walking behavior|ATP metabolic process|brain development|glutathione metabolic process|grooming behavior|L-cystine transport|lens development in camera-type eye|long-term memory|melanin biosynthetic process|visual learni…	bom04142	Lysosome
CTSA	0	1	1	1	PREDICTED: lysosomal protective protein [Bos mutus]	GO:0005764,GO:0005654,GO:0004185,GO:1904715,GO:0051603,GO:0031647	lysosome|nucleoplasm|serine-type carboxypeptidase activity|negative regulation of chaperone-mediated autophagy|proteolysis involved in cellular protein catabolic process|regulation of protein stability	bom04142,bom04614	Lysosome|Renin-angiotensin system
CTSD	1	1	0	1	Cathepsin D, partial [Bos mutus]	GO:0005615,GO:0005764,GO:0042470,GO:0004190,GO:0030163,GO:0006508	extracellular space|lysosome|melanosome|aspartic-type endopeptidase activity|protein catabolic process|proteolysis	bom04071,bom04140,bom04142,bom04210,bom04915,bom05152,bom05415	Sphingolipid signaling pathway|Autophagy - animal|Lysosome|Apoptosis|Estrogen signaling pathway|Tuberculosis|Diabetic cardiomyopathy
CTSH	0	1	0	0	PREDICTED: pro-cathepsin H, partial [Bos mutus]	GO:0097208,GO:0036464,GO:0005829,GO:0005615,GO:0005764,GO:0004177,GO:0008656,GO:0004197,GO:0008234,GO:0004175,GO:0030108,GO:0004252,GO:0070324,GO:0010815,GO:0097067,GO:0060448,GO:0070371,GO:0002764,GO:0033619,GO:0001656,GO:0043066,GO:0010813,GO:0045766,GO:2001235,GO:0030335,GO:0008284,GO:0010634,GO:0010628,GO:0010952,GO:0031648,GO:0006508,GO:0051603,GO:0032526,GO:0043129,GO:0001913,GO:0031638	alveolar lamellar body|cytoplasmic ribonucleoprotein granule|cytosol|extracellular space|lysosome|aminopeptidase activity|cysteine-type endopeptidase activator activity involved in apoptotic process|cysteine-type endopeptidase activity|cysteine-type peptidase activity|endopeptidase activity|HLA-A specific activating MHC class I receptor activity|serine-type endopeptidase activity|thyroid hormone …	bom04142,bom04210	Lysosome|Apoptosis
CTSS	0	1	0	0	Cathepsin S, partial [Bos mutus]	GO:0005615,GO:0005764,GO:0005518,GO:0004197,GO:0001968,GO:0043236,GO:0043394,GO:0002250,GO:0048002,GO:0034769,GO:0097067,GO:0030574,GO:2001259,GO:0016485,GO:0051603,GO:0010447	extracellular space|lysosome|collagen binding|cysteine-type endopeptidase activity|fibronectin binding|laminin binding|proteoglycan binding|adaptive immune response|antigen processing and presentation of peptide antigen|basement membrane disassembly|cellular response to thyroid hormone stimulus|collagen catabolic process|positive regulation of cation channel activity|protein processing|proteolysi…	bom04142,bom04145,bom04210,bom04612,bom05152	Lysosome|Phagosome|Apoptosis|Antigen processing and presentation|Tuberculosis
CTSZ	1	1	0	1	PREDICTED: cathepsin Z [Bos mutus]	GO:0005615,GO:0005764,GO:0004197,GO:0051603	extracellular space|lysosome|cysteine-type endopeptidase activity|proteolysis involved in cellular protein catabolic process	bom04142,bom04210	Lysosome|Apoptosis
CTTNBP2NL	0	1	0	1	PREDICTED: CTTNBP2 N-terminal-like protein [Bos mutus]	GO:0015629,GO:0005737,GO:0051721,GO:0034763,GO:0032410,GO:0006470	actin cytoskeleton|cytoplasm|protein phosphatase 2A binding|negative regulation of transmembrane transport|negative regulation of transporter activity|protein dephosphorylation
CUX2	0	1	0	0	PREDICTED: homeobox protein cut-like 2 [Bos mutus]	GO:0070062,GO:0000139,GO:0005634,GO:0000981,GO:0001078,GO:0000978,GO:0000977,GO:0043565,GO:0071310,GO:0050890,GO:0048193,GO:0000122,GO:0050775,GO:0061003,GO:2000463,GO:0010628,GO:0051965,GO:0007614	extracellular exosome|Golgi membrane|nucleus|DNA-binding transcription factor activity, RNA polymerase II-specific|proximal promoter DNA-binding transcription repressor activity, RNA polymerase II-specific|RNA polymerase II proximal promoter sequence-specific DNA binding|RNA polymerase II regulatory region sequence-specific DNA binding|sequence-specific DNA binding|cellular response to organic su…
CUZD1	1	1	0	0	spermadhesin-1 precursor [Bos taurus]	GO:0005576,GO:0008083,GO:0007338	extracellular region|growth factor activity|single fertilization
CWH43	1	1	0	1	PREDICTED: PGAP2-interacting protein [Bos mutus]	GO:0016021,GO:0006506	integral component of membrane|GPI anchor biosynthetic process
CX3CR1	1	1	1	1	hypothetical protein [Bos mutus]	GO:0009897,GO:0016021,GO:0005654,GO:0019957,GO:0016493,GO:0019960,GO:0016495,GO:0019956,GO:0019722,GO:0060326,GO:0071222,GO:0006935,GO:0006955,GO:0050901,GO:0016525,GO:0007200,GO:0007204,GO:0050769,GO:0045428,GO:0042534	external side of plasma membrane|integral component of membrane|nucleoplasm|C-C chemokine binding|C-C chemokine receptor activity|C-X3-C chemokine binding|C-X3-C chemokine receptor activity|chemokine binding|calcium-mediated signaling|cell chemotaxis|cellular response to lipopolysaccharide|chemotaxis|immune response|leukocyte tethering or rolling|negative regulation of angiogenesis|phospholipase …	bom04060,bom04061,bom04062	Cytokine-cytokine receptor interaction|Viral protein interaction with cytokine and cytokine receptor|Chemokine signaling pathway
CXADR	1	1	1	1	PREDICTED: coxsackievirus and adenovirus receptor isoform X2 [Bos mutus]	GO:0001669,GO:0005912,GO:0016327,GO:0016323,GO:0005923,GO:0044297,GO:0005737,GO:0030175,GO:0030426,GO:0016021,GO:0045121,GO:0043005,GO:0005634,GO:0005886,GO:0008013,GO:0050839,GO:0071253,GO:0030165,GO:0031532,GO:0086067,GO:0048739,GO:0045216,GO:0010669,GO:0046629,GO:0008354,GO:0007507,GO:0007157,GO:0034109,GO:0007005,GO:0030593	acrosomal vesicle|adherens junction|apicolateral plasma membrane|basolateral plasma membrane|bicellular tight junction|cell body|cytoplasm|filopodium|growth cone|integral component of membrane|membrane raft|neuron projection|nucleus|plasma membrane|beta-catenin binding|cell adhesion molecule binding|connexin binding|PDZ domain binding|actin cytoskeleton reorganization|AV node cell to bundle of Hi…	bom05416	Viral myocarditis
CXCL10	0	1	0	0	C-X-C motif chemokine 10 precursor [Bos taurus]	GO:0009897,GO:0005615,GO:0005622,GO:0008009,GO:0048248,GO:0008201,GO:0007189,GO:0061844,GO:0071222,GO:0070098,GO:0006935,GO:0051607,GO:0042118,GO:0007186,GO:0006955,GO:0006954,GO:0030595,GO:0045662,GO:1901740,GO:0030593,GO:0043950,GO:0090026,GO:0051281,GO:2000406,GO:0042127,GO:1901509,GO:0010819,GO:0010818	external side of plasma membrane|extracellular space|intracellular|chemokine activity|CXCR3 chemokine receptor binding|heparin binding|adenylate cyclase-activating G protein-coupled receptor signaling pathway|antimicrobial humoral immune response mediated by antimicrobial peptide|cellular response to lipopolysaccharide|chemokine-mediated signaling pathway|chemotaxis|defense response to virus|endo…	bom04060,bom04061,bom04062,bom04620,bom04622,bom04623,bom04657,bom04668,bom05160,bom05164,bom05169,bom05171	Cytokine-cytokine receptor interaction|Viral protein interaction with cytokine and cytokine receptor|Chemokine signaling pathway|Toll-like receptor signaling pathway|RIG-I-like receptor signaling pathway|Cytosolic DNA-sensing pathway|IL-17 signaling pathway|TNF signaling pathway|Hepatitis C|Influenza A|Epstein-Barr virus infection|Coronavirus disease - COVID-19
CXCL17	0	1	0	0	PREDICTED: VEGF coregulated chemokine 1 [Bos mutus]	GO:0005615,GO:0000187,GO:0001525,GO:0030154,GO:0006935,GO:0050728,GO:0010759,GO:0090026,GO:0010575	extracellular space|activation of MAPK activity|angiogenesis|cell differentiation|chemotaxis|negative regulation of inflammatory response|positive regulation of macrophage chemotaxis|positive regulation of monocyte chemotaxis|positive regulation of vascular endothelial growth factor production	bom04060	Cytokine-cytokine receptor interaction
CXCL8	0	1	0	0	interleukin-8 precursor [Bubalus bubalis]	GO:0005576,GO:0005615,GO:0005622,GO:0008009,GO:0005153,GO:0061844,GO:0007050,GO:0044344,GO:0071347,GO:0071222,GO:0071356,GO:0070098,GO:0048566,GO:0006955,GO:0050930,GO:0006954,GO:0035556,GO:0030595,GO:0045744,GO:0042119,GO:0030593,GO:0045766,GO:0031623,GO:0030155,GO:2000535,GO:0045091,GO:0034976	extracellular region|extracellular space|intracellular|chemokine activity|interleukin-8 receptor binding|antimicrobial humoral immune response mediated by antimicrobial peptide|cell cycle arrest|cellular response to fibroblast growth factor stimulus|cellular response to interleukin-1|cellular response to lipopolysaccharide|cellular response to tumor necrosis factor|chemokine-mediated signaling pa…	bom04060,bom04061,bom04062,bom04064,bom04072,bom04218,bom04620,bom04621,bom04622,bom04657,bom04932,bom04933,bom05132,bom05133,bom05134,bom05135,bom05142,bom05144,bom05146,bom05161,bom05163,bom05164,bom05167,bom05171,bom05200,bom05202,bom05219,bom05323,bom05417	Cytokine-cytokine receptor interaction|Viral protein interaction with cytokine and cytokine receptor|Chemokine signaling pathway|NF-kappa B signaling pathway|Phospholipase D signaling pathway|Cellular senescence|Toll-like receptor signaling pathway|NOD-like receptor signaling pathway|RIG-I-like receptor signaling pathway|IL-17 signaling pathway|Non-alcoholic fatty liver disease|AGE-RAGE signaling…
CXCL9	0	1	0	0	C-X-C motif chemokine 9 precursor [Bos taurus]	GO:0009897,GO:0005615,GO:0005622,GO:0008009,GO:0048248,GO:0007189,GO:0061844,GO:0071222,GO:0070098,GO:0006935,GO:0051607,GO:0006955,GO:0006954,GO:0030595,GO:0030593,GO:0043950,GO:0045663,GO:1901741,GO:0051281,GO:0042127	external side of plasma membrane|extracellular space|intracellular|chemokine activity|CXCR3 chemokine receptor binding|adenylate cyclase-activating G protein-coupled receptor signaling pathway|antimicrobial humoral immune response mediated by antimicrobial peptide|cellular response to lipopolysaccharide|chemokine-mediated signaling pathway|chemotaxis|defense response to virus|immune response|infl…	bom04060,bom04061,bom04062,bom04620	Cytokine-cytokine receptor interaction|Viral protein interaction with cytokine and cytokine receptor|Chemokine signaling pathway|Toll-like receptor signaling pathway
CXCR1	0	0	0	1	PREDICTED: C-X-C chemokine receptor type 1 isoform X1 [Bos mutus]	GO:0009897,GO:0016021,GO:0005622,GO:0019957,GO:0016493,GO:0016494,GO:0019956,GO:0019959,GO:0019722,GO:0060326,GO:0006935,GO:0006955,GO:0030593,GO:0007204	external side of plasma membrane|integral component of membrane|intracellular|C-C chemokine binding|C-C chemokine receptor activity|C-X-C chemokine receptor activity|chemokine binding|interleukin-8 binding|calcium-mediated signaling|cell chemotaxis|chemotaxis|immune response|neutrophil chemotaxis|positive regulation of cytosolic calcium ion concentration	bom04060,bom04061,bom04062,bom04072,bom04144	Cytokine-cytokine receptor interaction|Viral protein interaction with cytokine and cytokine receptor|Chemokine signaling pathway|Phospholipase D signaling pathway|Endocytosis
CXCR2	1	1	0	1	PREDICTED: C-X-C chemokine receptor type 2 [Bison bison bison]	GO:0009897,GO:0016021,GO:0005622,GO:0019957,GO:0016493,GO:0016494,GO:0019956,GO:0019959,GO:0019722,GO:0060326,GO:0006935,GO:0006955,GO:0030593,GO:0007204	external side of plasma membrane|integral component of membrane|intracellular|C-C chemokine binding|C-C chemokine receptor activity|C-X-C chemokine receptor activity|chemokine binding|interleukin-8 binding|calcium-mediated signaling|cell chemotaxis|chemotaxis|immune response|neutrophil chemotaxis|positive regulation of cytosolic calcium ion concentration	bom04060,bom04061,bom04062,bom04072,bom04144,bom05163	Cytokine-cytokine receptor interaction|Viral protein interaction with cytokine and cytokine receptor|Chemokine signaling pathway|Phospholipase D signaling pathway|Endocytosis|Human cytomegalovirus infection
CXCR4	1	1	0	0	C-X-C chemokine receptor type 4 [Bos taurus]	GO:0030054,GO:0031252,GO:0005769,GO:0009897,GO:0016021,GO:0005770,GO:0005764,GO:0005886,GO:0032991,GO:0003779,GO:0019957,GO:0016493,GO:0038147,GO:0019956,GO:0032027,GO:0043130,GO:0031625,GO:0007420,GO:0019722,GO:0060326,GO:0071345,GO:0006935,GO:0038160,GO:0006955,GO:0022008,GO:0007204,GO:0050920,GO:0001666	cell junction|cell leading edge|early endosome|external side of plasma membrane|integral component of membrane|late endosome|lysosome|plasma membrane|protein-containing complex|actin binding|C-C chemokine binding|C-C chemokine receptor activity|C-X-C motif chemokine 12 receptor activity|chemokine binding|myosin light chain binding|ubiquitin binding|ubiquitin protein ligase binding|brain developme…	bom04020,bom04060,bom04061,bom04062,bom04144,bom04360,bom04670,bom04672,bom04810,bom05163,bom05170,bom05200	Calcium signaling pathway|Cytokine-cytokine receptor interaction|Viral protein interaction with cytokine and cytokine receptor|Chemokine signaling pathway|Endocytosis|Axon guidance|Leukocyte transendothelial migration|Intestinal immune network for IgA production|Regulation of actin cytoskeleton|Human cytomegalovirus infection|Human immunodeficiency virus 1 infection|Pathways in cancer
CXCR6	1	1	1	0	PREDICTED: C-X-C chemokine receptor type 6 [Bos mutus]	GO:0009897,GO:0016021,GO:0005622,GO:0019957,GO:0016493,GO:0016494,GO:0019956,GO:0015026,GO:0019722,GO:0060326,GO:0006935,GO:0006955,GO:0006954,GO:0007204	external side of plasma membrane|integral component of membrane|intracellular|C-C chemokine binding|C-C chemokine receptor activity|C-X-C chemokine receptor activity|chemokine binding|coreceptor activity|calcium-mediated signaling|cell chemotaxis|chemotaxis|immune response|inflammatory response|positive regulation of cytosolic calcium ion concentration	bom04060,bom04062	Cytokine-cytokine receptor interaction|Chemokine signaling pathway
CYFIP2	0	1	0	0	hypothetical protein DBR06_SOUSAS810145, partial [Sousa chinensis]	GO:0030054,GO:0005737,GO:0005829,GO:0070062,GO:0016020,GO:0043005,GO:0005634,GO:0048471,GO:0045202,GO:0097202,GO:0006915,GO:0007411,GO:0000902,GO:0030031,GO:0098609,GO:0097484,GO:0038096,GO:0051388,GO:0045862,GO:0048010	cell junction|cytoplasm|cytosol|extracellular exosome|membrane|neuron projection|nucleus|perinuclear region of cytoplasm|synapse|activation of cysteine-type endopeptidase activity|apoptotic process|axon guidance|cell morphogenesis|cell projection assembly|cell-cell adhesion|dendrite extension|Fc-gamma receptor signaling pathway involved in phagocytosis|positive regulation of neurotrophin TRK rece…	bom03013,bom04810,bom05132	RNA transport|Regulation of actin cytoskeleton|Salmonella infection
CYGB	1	1	0	1	unnamed protein product, partial [Gulo gulo]	GO:0005829,GO:0043005,GO:0043025,GO:0016607,GO:0004096,GO:0047888,GO:0020037,GO:0005506,GO:0008941,GO:0019825,GO:0005344,GO:0004601,GO:0019395,GO:0032966,GO:0010764,GO:2000490,GO:0015671,GO:0050999,GO:0001666,GO:0006979	cytosol|neuron projection|neuronal cell body|nuclear speck|catalase activity|fatty acid peroxidase activity|heme binding|iron ion binding|nitric oxide dioxygenase activity|oxygen binding|oxygen carrier activity|peroxidase activity|fatty acid oxidation|negative regulation of collagen biosynthetic process|negative regulation of fibroblast migration|negative regulation of hepatic stellate cell activ…
CYSLTR1	0	1	0	0	PREDICTED: cysteinyl leukotriene receptor 1 [Bos mutus]	GO:0016021,GO:0005886,GO:0004974	integral component of membrane|plasma membrane|leukotriene receptor activity	bom04020,bom04080	Calcium signaling pathway|Neuroactive ligand-receptor interaction
CYSRT1	1	1	0	1	hypothetical protein M91_00236, partial [Bos mutus]
CYSTM1	0	0	1	1	cysteine-rich and transmembrane domain-containing protein 1 isoform X2 [Bos indicus x Bos taurus]	GO:0016021	integral component of membrane
CYTIP	1	1	0	0	PREDICTED: cytohesin-interacting protein [Bos mutus]	GO:0005938,GO:0005737,GO:0005829,GO:0005769,GO:0005654,GO:0030155	cell cortex|cytoplasm|cytosol|early endosome|nucleoplasm|regulation of cell adhesion
D2HGDH	1	1	0	1	PREDICTED: D-2-hydroxyglutarate dehydrogenase, mitochondrial [Bos mutus]	GO:0031234,GO:0005739,GO:0051990,GO:0004458,GO:0071949,GO:0019516,GO:0022904	extrinsic component of cytoplasmic side of plasma membrane|mitochondrion|(R)-2-hydroxyglutarate dehydrogenase activity|D-lactate dehydrogenase (cytochrome) activity|FAD binding|lactate oxidation|respiratory electron transport chain
DAB2IP	1	1	0	1	PREDICTED: disabled homolog 2-interacting protein [Bos mutus]			bom04210,bom04668	Apoptosis|TNF signaling pathway
DACT2	1	1	0	1	PREDICTED: dapper homolog 2 [Bos mutus]	GO:0005737,GO:0008013,GO:0070097,GO:0051018,GO:0005080,GO:0008134,GO:0003382,GO:0072061,GO:0007162,GO:1900108,GO:0030111,GO:0043588	cytoplasm|beta-catenin binding|delta-catenin binding|protein kinase A binding|protein kinase C binding|transcription factor binding|epithelial cell morphogenesis|inner medullary collecting duct development|negative regulation of cell adhesion|negative regulation of nodal signaling pathway|regulation of Wnt signaling pathway|skin development
DAGLA	1	1	0	0	PREDICTED: sn1-specific diacylglycerol lipase alpha [Bos mutus]	GO:0099055,GO:0045211,GO:0043196,GO:0016787,GO:0046872,GO:0019369,GO:0046340,GO:0071926,GO:0007216,GO:0007405,GO:0022008,GO:0042136,GO:0098921	integral component of postsynaptic membrane|postsynaptic membrane|varicosity|hydrolase activity|metal ion binding|arachidonic acid metabolic process|diacylglycerol catabolic process|endocannabinoid signaling pathway|G protein-coupled glutamate receptor signaling pathway|neuroblast proliferation|neurogenesis|neurotransmitter biosynthetic process|retrograde trans-synaptic signaling by endocannabino…	bom04723,bom04925	Retrograde endocannabinoid signaling|Aldosterone synthesis and secretion
DAO	0	1	0	1	D-amino-acid oxidase, partial [Bos mutus]			bom00260,bom00330,bom00472,bom04146	Glycine, serine and threonine metabolism|Arginine and proline metabolism|D-Arginine and D-ornithine metabolism|Peroxisome
DAPP1	0	1	0	0	dual adapter for phosphotyrosine and 3-phosphotyrosine and 3-phosphoinositide [Bos taurus]	GO:0005737,GO:0005829,GO:0016020,GO:0005886,GO:0030165,GO:0005547,GO:0043325,GO:0005543,GO:0006470,GO:0007165	cytoplasm|cytosol|membrane|plasma membrane|PDZ domain binding|phosphatidylinositol-3,4,5-trisphosphate binding|phosphatidylinositol-3,4-bisphosphate binding|phospholipid binding|protein dephosphorylation|signal transduction	bom04662	B cell receptor signaling pathway
DARS2	1	1	1	1	PREDICTED: aspartate--tRNA ligase, mitochondrial [Bos mutus]	GO:0005759,GO:0004815,GO:0005524,GO:0003676,GO:0070145	mitochondrial matrix|aspartate-tRNA ligase activity|ATP binding|nucleic acid binding|mitochondrial asparaginyl-tRNA aminoacylation	bom00970	Aminoacyl-tRNA biosynthesis
DBF4B	1	1	0	1	PREDICTED: protein DBF4 homolog B [Bos mutus]	GO:0016235,GO:0005737,GO:0031431,GO:0043231,GO:0005654,GO:0005634,GO:0003676,GO:0030295,GO:0019901,GO:0043539,GO:0008270,GO:0007049,GO:0008284,GO:0045740,GO:0010971,GO:0010571	aggresome|cytoplasm|Dbf4-dependent protein kinase complex|intracellular membrane-bounded organelle|nucleoplasm|nucleus|nucleic acid binding|protein kinase activator activity|protein kinase binding|protein serine/threonine kinase activator activity|zinc ion binding|cell cycle|positive regulation of cell proliferation|positive regulation of DNA replication|positive regulation of G2/M transition of …
DBP	0	0	0	1	PREDICTED: D site-binding protein [Bos mutus]	GO:0005634,GO:0001077,GO:0000977,GO:0007623	nucleus|proximal promoter DNA-binding transcription activator activity, RNA polymerase II-specific|RNA polymerase II regulatory region sequence-specific DNA binding|circadian rhythm
DCC	1	0	0	0	PREDICTED: netrin receptor DCC [Bos mutus]			bom04360,bom05200,bom05210	Axon guidance|Pathways in cancer|Colorectal cancer
DCHS1	1	1	0	0	PREDICTED: protocadherin-16 [Bos mutus]	GO:0045177,GO:0016021,GO:0005622,GO:0016020,GO:0005886,GO:0005509,GO:0001658,GO:0016339,GO:0003273,GO:0090102,GO:0072137,GO:0048565,GO:0007157,GO:0035329,GO:0007156,GO:0003192,GO:0021915,GO:0022008,GO:0043931,GO:0007389,GO:0036342,GO:0072659	apical part of cell|integral component of membrane|intracellular|membrane|plasma membrane|calcium ion binding|branching involved in ureteric bud morphogenesis|calcium-dependent cell-cell adhesion via plasma membrane cell adhesion molecules|cell migration involved in endocardial cushion formation|cochlea development|condensed mesenchymal cell proliferation|digestive tract development|heterophilic …	bom04392	Hippo signaling pathway - multiple species
DCLK1	1	1	0	0	serine/threonine-protein kinase DCLK1 isoform 2 [Homo sapiens]	GO:0030424,GO:0030426,GO:0005524,GO:0004672,GO:0004674,GO:0030154,GO:0007399,GO:0006468,GO:0009615	axon|growth cone|ATP binding|protein kinase activity|protein serine/threonine kinase activity|cell differentiation|nervous system development|protein phosphorylation|response to virus
DCLK2	0	1	0	0	PREDICTED: serine/threonine-protein kinase DCLK2 [Bos mutus]	GO:0005737,GO:0005856,GO:0005524,GO:0004674,GO:0035556	cytoplasm|cytoskeleton|ATP binding|protein serine/threonine kinase activity|intracellular signal transduction
DCLRE1B	1	1	1	1	PREDICTED: 5' exonuclease Apollo [Bos mutus]	GO:0005813,GO:0000781,GO:0005737,GO:0005634,GO:0008409,GO:0006281,GO:0007093,GO:0031848,GO:0000723,GO:0031860,GO:0031627	centrosome|chromosome, telomeric region|cytoplasm|nucleus|5'-3' exonuclease activity|DNA repair|mitotic cell cycle checkpoint|protection from non-homologous end joining at telomere|telomere maintenance|telomeric 3' overhang formation|telomeric loop formation
DCP1B	0	1	0	0	PREDICTED: mRNA-decapping enzyme 1B [Bos mutus]	GO:0005634,GO:0000932,GO:0008047,GO:0016787,GO:0003729,GO:0000290,GO:0031087,GO:0000184	nucleus|P-body|enzyme activator activity|hydrolase activity|mRNA binding|deadenylation-dependent decapping of nuclear-transcribed mRNA|deadenylation-independent decapping of nuclear-transcribed mRNA|nuclear-transcribed mRNA catabolic process, nonsense-mediated decay	bom03018	RNA degradation
DCUN1D3	0	1	0	0	DCN1-like protein 3 [Bos taurus]	GO:0048471,GO:0005886,GO:0000151,GO:0097602,GO:0031624,GO:0032182,GO:0030308,GO:2000134,GO:0043065,GO:0051443,GO:0045116,GO:0010332,GO:0010225	perinuclear region of cytoplasm|plasma membrane|ubiquitin ligase complex|cullin family protein binding|ubiquitin conjugating enzyme binding|ubiquitin-like protein binding|negative regulation of cell growth|negative regulation of G1/S transition of mitotic cell cycle|positive regulation of apoptotic process|positive regulation of ubiquitin-protein transferase activity|protein neddylation|response …
DDAH2	1	1	0	0	N(G),N(G)-dimethylarginine dimethylaminohydrolase 2 isoform X1 [Vulpes vulpes]	GO:0005829,GO:0005815,GO:0005739,GO:0016597,GO:0016403,GO:0006527,GO:0006525,GO:0000052,GO:0045429	cytosol|microtubule organizing center|mitochondrion|amino acid binding|dimethylargininase activity|arginine catabolic process|arginine metabolic process|citrulline metabolic process|positive regulation of nitric oxide biosynthetic process
DDC	0	1	0	0	PREDICTED: aromatic-L-amino-acid decarboxylase [Bos mutus]	GO:0004058,GO:0030170,GO:0006520,GO:0042416	aromatic-L-amino-acid decarboxylase activity|pyridoxal phosphate binding|cellular amino acid metabolic process|dopamine biosynthetic process	bom00350,bom00360,bom00380,bom04726,bom04728,bom05030,bom05031,bom05034	Tyrosine metabolism|Phenylalanine metabolism|Tryptophan metabolism|Serotonergic synapse|Dopaminergic synapse|Cocaine addiction|Amphetamine addiction|Alcoholism
DDI2	0	1	0	1	hypothetical protein [Bos mutus]	GO:0005829,GO:0005654,GO:0004190,GO:0042802,GO:0043130,GO:0016485	cytosol|nucleoplasm|aspartic-type endopeptidase activity|identical protein binding|ubiquitin binding|protein processing
DDIT3	0	0	0	1	DNA damage-inducible transcript 3 protein isoform X1 [Bos taurus]	GO:1990622,GO:1990617,GO:0036488,GO:0005737,GO:0005770,GO:0005634,GO:0032993,GO:0035976,GO:0008140,GO:0003677,GO:0043522,GO:0046982,GO:0042803,GO:0001077,GO:0000978,GO:0006915,GO:0001955,GO:0007050,GO:0045454,GO:0030968,GO:0006983,GO:0072655,GO:0070059,GO:1990442,GO:0042789,GO:0090090,GO:0120163,GO:0032792,GO:2000016,GO:0045599,GO:0045662,GO:0051898,GO:1903026,GO:0000122,GO:0045892,GO:0051091,GO:…	CHOP-ATF3 complex|CHOP-ATF4 complex|CHOP-C/EBP complex|cytoplasm|late endosome|nucleus|protein-DNA complex|transcription factor AP-1 complex|cAMP response element binding protein binding|DNA binding|leucine zipper domain binding|protein heterodimerization activity|protein homodimerization activity|proximal promoter DNA-binding transcription activator activity, RNA polymerase II-specific|RNA polym…	bom04010,bom04141,bom04210,bom04932,bom05010,bom05012,bom05014,bom05020,bom05022,bom05202,bom05417	MAPK signaling pathway|Protein processing in endoplasmic reticulum|Apoptosis|Non-alcoholic fatty liver disease|Alzheimer disease|Parkinson disease|Amyotrophic lateral sclerosis|Prion disease|Pathways of neurodegeneration - multiple diseases|Transcriptional misregulation in cancer|Lipid and atherosclerosis
DDIT4L	0	0	0	1	hypothetical protein DBR06_SOUSAS13610036, partial [Sousa chinensis]	GO:0005737,GO:0009968	cytoplasm|negative regulation of signal transduction
DDX51	1	1	1	1	PREDICTED: ATP-dependent RNA helicase DDX51 [Bos mutus]	GO:0016020,GO:0005730,GO:0005524,GO:0004386,GO:0003723,GO:0006364	membrane|nucleolus|ATP binding|helicase activity|RNA binding|rRNA processing
DDX58	0	0	0	1	PREDICTED: probable ATP-dependent RNA helicase DDX58 [Bos mutus]	GO:0015629,GO:0005923,GO:0005737,GO:0032587,GO:0005524,GO:0003725,GO:0004386,GO:0003727,GO:0008270,GO:0071360,GO:0045087,GO:0002230,GO:0032727,GO:1902741,GO:0032728,GO:0035549,GO:2000778,GO:0002735,GO:0060760,GO:1904469,GO:0030334,GO:0043330,GO:0039529	actin cytoskeleton|bicellular tight junction|cytoplasm|ruffle membrane|ATP binding|double-stranded RNA binding|helicase activity|single-stranded RNA binding|zinc ion binding|cellular response to exogenous dsRNA|innate immune response|positive regulation of defense response to virus by host|positive regulation of interferon-alpha production|positive regulation of interferon-alpha secretion|positiv…	bom04064,bom04622,bom04623,bom05160,bom05161,bom05162,bom05164,bom05168,bom05169,bom05171	NF-kappa B signaling pathway|RIG-I-like receptor signaling pathway|Cytosolic DNA-sensing pathway|Hepatitis C|Hepatitis B|Measles|Influenza A|Herpes simplex virus 1 infection|Epstein-Barr virus infection|Coronavirus disease - COVID-19
DECR1	1	1	0	1	PREDICTED: 2,4-dienoyl-CoA reductase, mitochondrial [Bos mutus]	GO:0005829,GO:0005759,GO:0005739,GO:0005654,GO:0005634,GO:0008670,GO:0070402,GO:0016651,GO:0006635,GO:0120162,GO:0051289	cytosol|mitochondrial matrix|mitochondrion|nucleoplasm|nucleus|2,4-dienoyl-CoA reductase (NADPH) activity|NADPH binding|oxidoreductase activity, acting on NAD(P)H|fatty acid beta-oxidation|positive regulation of cold-induced thermogenesis|protein homotetramerization
DEGS1	1	1	0	1	hypothetical protein [Bos mutus]	GO:0005789,GO:0016021,GO:0005739,GO:0042284,GO:0046513,GO:0006633	endoplasmic reticulum membrane|integral component of membrane|mitochondrion|sphingolipid delta-4 desaturase activity|ceramide biosynthetic process|fatty acid biosynthetic process	bom00600,bom04071	Sphingolipid metabolism|Sphingolipid signaling pathway
DEGS2	0	0	1	0	PREDICTED: sphingolipid delta(4)-desaturase/C4-monooxygenase DES2 [Bos mutus]	GO:0005789,GO:0016021,GO:0042284,GO:0000170,GO:0046513,GO:0006667	endoplasmic reticulum membrane|integral component of membrane|sphingolipid delta-4 desaturase activity|sphingosine hydroxylase activity|ceramide biosynthetic process|sphinganine metabolic process	bom00600,bom04071	Sphingolipid metabolism|Sphingolipid signaling pathway
DENND1B	0	1	0	1	PREDICTED: DENN domain-containing protein 1B [Bos mutus]	GO:0030136,GO:0005829,GO:0043231,GO:0016607,GO:1901981,GO:0017137,GO:0017112,GO:0032456,GO:0006897,GO:0043547,GO:0015031,GO:0050776,GO:0050852,GO:0035745	clathrin-coated vesicle|cytosol|intracellular membrane-bounded organelle|nuclear speck|phosphatidylinositol phosphate binding|Rab GTPase binding|Rab guanyl-nucleotide exchange factor activity|endocytic recycling|endocytosis|positive regulation of GTPase activity|protein transport|regulation of immune response|T cell receptor signaling pathway|T-helper 2 cell cytokine production
DENND1C	1	1	0	0	PREDICTED: DENN domain-containing protein 1C isoform X2 [Bison bison bison]	GO:0030136,GO:0005829,GO:0043231,GO:1901981,GO:0017137,GO:0017112,GO:0032456,GO:0006897	clathrin-coated vesicle|cytosol|intracellular membrane-bounded organelle|phosphatidylinositol phosphate binding|Rab GTPase binding|Rab guanyl-nucleotide exchange factor activity|endocytic recycling|endocytosis
DENND2A	1	1	0	0	hypothetical protein [Bos mutus]	GO:0015629,GO:0005829,GO:0017112,GO:0015031,GO:0042147	actin cytoskeleton|cytosol|Rab guanyl-nucleotide exchange factor activity|protein transport|retrograde transport, endosome to Golgi
DEPDC1	0	1	1	1	PREDICTED: DEP domain-containing protein 1A isoform X1 [Bos mutus]	GO:0005634,GO:0017053,GO:0005096,GO:0035556,GO:0045892	nucleus|transcriptional repressor complex|GTPase activator activity|intracellular signal transduction|negative regulation of transcription, DNA-templated
DFFA	1	1	0	1	PREDICTED: DNA fragmentation factor subunit alpha [Bos mutus]	GO:0005829,GO:0005811,GO:0000790,GO:0005654,GO:0005634,GO:0005886,GO:0060703,GO:0044183,GO:0019904,GO:0006309,GO:0061077,GO:1902511,GO:0032076,GO:1900118,GO:0043065,GO:0070242	cytosol|lipid droplet|nuclear chromatin|nucleoplasm|nucleus|plasma membrane|deoxyribonuclease inhibitor activity|protein binding involved in protein folding|protein domain specific binding|apoptotic DNA fragmentation|chaperone-mediated protein folding|negative regulation of apoptotic DNA fragmentation|negative regulation of deoxyribonuclease activity|negative regulation of execution phase of apop…	bom04210	Apoptosis
DFNB31	0	1	0	1	PREDICTED: whirlin isoform X1 [Bos mutus]
DGAT2	0	1	1	0	diacylglycerol O-acyltransferase 2 [Bos taurus]	GO:0005783,GO:0030176,GO:0016021,GO:0005811,GO:0016020,GO:0048471,GO:0003846,GO:0004144,GO:0050252,GO:0071400,GO:0035356,GO:0042632,GO:0046339,GO:0060613,GO:0055089,GO:0006071,GO:0019915,GO:0035336,GO:0034383,GO:0097006,GO:0019432	endoplasmic reticulum|integral component of endoplasmic reticulum membrane|integral component of membrane|lipid droplet|membrane|perinuclear region of cytoplasm|2-acylglycerol O-acyltransferase activity|diacylglycerol O-acyltransferase activity|retinol O-fatty-acyltransferase activity|cellular response to oleic acid|cellular triglyceride homeostasis|cholesterol homeostasis|diacylglycerol metaboli…	bom00561,bom04975	Glycerolipid metabolism|Fat digestion and absorption
DGKD	1	1	0	0	PREDICTED: LOW QUALITY PROTEIN: diacylglycerol kinase delta [Bos mutus]	GO:0005737,GO:0031410,GO:0005829,GO:0005634,GO:0005886,GO:0005524,GO:0019992,GO:0004143,GO:0042802,GO:0046872,GO:0003951,GO:0046982,GO:0042803,GO:0046339,GO:0006897,GO:0007173,GO:0046834,GO:0007275,GO:0030168,GO:0051260,GO:0007205,GO:0015031,GO:0010033,GO:0019932,GO:0007165	cytoplasm|cytoplasmic vesicle|cytosol|nucleus|plasma membrane|ATP binding|diacylglycerol binding|diacylglycerol kinase activity|identical protein binding|metal ion binding|NAD+ kinase activity|protein heterodimerization activity|protein homodimerization activity|diacylglycerol metabolic process|endocytosis|epidermal growth factor receptor signaling pathway|lipid phosphorylation|multicellular orga…	bom00561,bom00564,bom04070,bom04072,bom05231	Glycerolipid metabolism|Glycerophospholipid metabolism|Phosphatidylinositol signaling system|Phospholipase D signaling pathway|Choline metabolism in cancer
DGKH	0	1	0	1	diacylglycerol kinase eta isoform X1 [Bos indicus x Bos taurus]	GO:0005737,GO:0005768,GO:0005886,GO:0005524,GO:0004143,GO:0046872,GO:0003951,GO:0035556,GO:0046473,GO:0030168,GO:0051259,GO:0007205	cytoplasm|endosome|plasma membrane|ATP binding|diacylglycerol kinase activity|metal ion binding|NAD+ kinase activity|intracellular signal transduction|phosphatidic acid metabolic process|platelet activation|protein complex oligomerization|protein kinase C-activating G protein-coupled receptor signaling pathway	bom00561,bom00564,bom04070,bom04072,bom05231	Glycerolipid metabolism|Glycerophospholipid metabolism|Phosphatidylinositol signaling system|Phospholipase D signaling pathway|Choline metabolism in cancer
DHCR24	0	1	1	0	PREDICTED: delta(24)-sterol reductase [Bos mutus]	GO:0005737,GO:0005783,GO:0005789,GO:0000139,GO:0016021,GO:0016020,GO:0005634,GO:0000246,GO:0050614,GO:0019899,GO:0071949,GO:0016628,GO:0042605,GO:0006915,GO:0007050,GO:0006695,GO:0033489,GO:0033490,GO:0043066,GO:0043154,GO:0055114,GO:1901214,GO:0006979,GO:0043588,GO:0008202,GO:0009888	cytoplasm|endoplasmic reticulum|endoplasmic reticulum membrane|Golgi membrane|integral component of membrane|membrane|nucleus|delta24(24-1) sterol reductase activity|delta24-sterol reductase activity|enzyme binding|FAD binding|oxidoreductase activity, acting on the CH-CH group of donors, NAD or NADP as acceptor|peptide antigen binding|apoptotic process|cell cycle arrest|cholesterol biosynthetic p…	bom00100	Steroid biosynthesis
DHCR7	0	1	1	0	hypothetical protein [Bos mutus]	GO:0030176,GO:0047598,GO:0050661,GO:0009918,GO:0016132,GO:0006695,GO:0016126	integral component of endoplasmic reticulum membrane|7-dehydrocholesterol reductase activity|NADP binding|sterol delta7 reductase activity|brassinosteroid biosynthetic process|cholesterol biosynthetic process|sterol biosynthetic process	bom00100	Steroid biosynthesis
DHRS1	1	1	1	1	PREDICTED: dehydrogenase/reductase SDR family member 1 [Bos mutus]	GO:0005783,GO:0016491	endoplasmic reticulum|oxidoreductase activity
DHRS7	1	1	0	0	PREDICTED: dehydrogenase/reductase SDR family member 7 [Bos mutus]	GO:0016020,GO:0016491	membrane|oxidoreductase activity
DHRS9	0	0	0	1	dehydrogenase/reductase SDR family member 9 isoform X1 [Odocoileus virginianus texanus]	GO:0030176,GO:0031090,GO:0004022,GO:0004745,GO:0047035,GO:0042904	integral component of endoplasmic reticulum membrane|organelle membrane|alcohol dehydrogenase (NAD) activity|retinol dehydrogenase activity|testosterone dehydrogenase (NAD+) activity|9-cis-retinoic acid biosynthetic process	bom00830	Retinol metabolism
DHX58	0	0	1	0	PREDICTED: probable ATP-dependent RNA helicase DHX58 [Bos mutus]	GO:0005737,GO:0005524,GO:0003677,GO:0003725,GO:0004386,GO:0003727,GO:0008270,GO:0051607,GO:0045087,GO:0045824,GO:0039534,GO:0039536,GO:0032480,GO:1900245,GO:1900246,GO:0032481,GO:0045088,GO:0009617,GO:0009615,GO:0016032	cytoplasm|ATP binding|DNA binding|double-stranded RNA binding|helicase activity|single-stranded RNA binding|zinc ion binding|defense response to virus|innate immune response|negative regulation of innate immune response|negative regulation of MDA-5 signaling pathway|negative regulation of RIG-I signaling pathway|negative regulation of type I interferon production|positive regulation of MDA-5 sign…	bom04622	RIG-I-like receptor signaling pathway
DIAPH2	0	1	0	1	PREDICTED: protein diaphanous homolog 2 [Bos mutus]	GO:0005829,GO:0005769,GO:0005783,GO:0043231,GO:0005730,GO:0003779,GO:0017048,GO:0005102,GO:0007015,GO:0007292,GO:0007275,GO:0048477	cytosol|early endosome|endoplasmic reticulum|intracellular membrane-bounded organelle|nucleolus|actin binding|Rho GTPase binding|signaling receptor binding|actin filament organization|female gamete generation|multicellular organism development|oogenesis	bom04810	Regulation of actin cytoskeleton
DIAPH3	0	1	1	1	PREDICTED: protein diaphanous homolog 3 [Bos mutus]	GO:0005737,GO:0005829,GO:0005634,GO:0003779,GO:0045296,GO:0017048,GO:0030036,GO:0030041,GO:0007010,GO:0007283	cytoplasm|cytosol|nucleus|actin binding|cadherin binding|Rho GTPase binding|actin cytoskeleton organization|actin filament polymerization|cytoskeleton organization|spermatogenesis	bom04810	Regulation of actin cytoskeleton
DIEXF	0	0	0	1	PREDICTED: digestive organ expansion factor homolog [Bos mutus]	GO:0005730,GO:0005654,GO:0032040,GO:0003723,GO:0019843,GO:0034511,GO:0000462,GO:0007275,GO:0040019,GO:0030163,GO:0031648,GO:0006364	nucleolus|nucleoplasm|small-subunit processome|RNA binding|rRNA binding|U3 snoRNA binding|maturation of SSU-rRNA from tricistronic rRNA transcript (SSU-rRNA, 5.8S rRNA, LSU-rRNA)|multicellular organism development|positive regulation of embryonic development|protein catabolic process|protein destabilization|rRNA processing
DIO3	1	1	0	1	PREDICTED: thyroxine 5-deiodinase [Bos mutus]	GO:0010008,GO:0016021,GO:0005886,GO:0004800,GO:0042446,GO:0042403	endosome membrane|integral component of membrane|plasma membrane|thyroxine 5'-deiodinase activity|hormone biosynthetic process|thyroid hormone metabolic process	bom04919	Thyroid hormone signaling pathway
DIRAS3	1	1	0	0	hypothetical protein EI555_004188 [Monodon monoceros]
DISP2	0	1	0	1	PREDICTED: protein dispatched homolog 2 [Bos mutus]	GO:0016021,GO:0005886,GO:0007224	integral component of membrane|plasma membrane|smoothened signaling pathway
DKC1	0	0	0	1	PREDICTED: H/ACA ribonucleoprotein complex subunit 4 isoform X1 [Bos mutus]			bom03008	Ribosome biogenesis in eukaryotes
DKK1	1	1	0	0	PREDICTED: dickkopf-related protein 1 [Bos mutus]			bom04310,bom05010,bom05022	Wnt signaling pathway|Alzheimer disease|Pathways of neurodegeneration - multiple diseases
DKK2	0	0	0	1	PREDICTED: dickkopf-related protein 2 [Bos mutus]	GO:0005576,GO:0005615,GO:0039706,GO:0048019,GO:0007275,GO:0090090,GO:0030178,GO:0090263,GO:0016055	extracellular region|extracellular space|co-receptor binding|receptor antagonist activity|multicellular organism development|negative regulation of canonical Wnt signaling pathway|negative regulation of Wnt signaling pathway|positive regulation of canonical Wnt signaling pathway|Wnt signaling pathway	bom04310,bom05010,bom05022	Wnt signaling pathway|Alzheimer disease|Pathways of neurodegeneration - multiple diseases
DLAT	1	1	0	0	PREDICTED: dihydrolipoyllysine-residue acetyltransferase component of pyruvate dehydrogenase complex, mitochondrial isoform X1 [Bos mutus]	GO:0005759,GO:0005967,GO:0005739,GO:0043209,GO:0045254,GO:0004742,GO:0042802,GO:0006086,GO:0006006,GO:0030431,GO:0006099	mitochondrial matrix|mitochondrial pyruvate dehydrogenase complex|mitochondrion|myelin sheath|pyruvate dehydrogenase complex|dihydrolipoyllysine-residue acetyltransferase activity|identical protein binding|acetyl-CoA biosynthetic process from pyruvate|glucose metabolic process|sleep|tricarboxylic acid cycle	bom00010,bom00020,bom00620	Glycolysis / Gluconeogenesis|Citrate cycle (TCA cycle)|Pyruvate metabolism
DLD	1	1	0	0	Dihydrolipoyl dehydrogenase, mitochondrial, partial [Bos mutus]	GO:0043159,GO:0005759,GO:0005739,GO:0031514,GO:0043209,GO:0005654,GO:0005634,GO:0045252,GO:0045254,GO:0004148,GO:0009055,GO:0050660,GO:0043544,GO:0051287,GO:0006103,GO:0007568,GO:0045454,GO:0051068,GO:0007369,GO:0106077,GO:0009106,GO:0061732,GO:0006120,GO:0006508,GO:0042391,GO:0048240	acrosomal matrix|mitochondrial matrix|mitochondrion|motile cilium|myelin sheath|nucleoplasm|nucleus|oxoglutarate dehydrogenase complex|pyruvate dehydrogenase complex|dihydrolipoyl dehydrogenase activity|electron transfer activity|flavin adenine dinucleotide binding|lipoamide binding|NAD binding|2-oxoglutarate metabolic process|aging|cell redox homeostasis|dihydrolipoamide metabolic process|gastru…	bom00010,bom00020,bom00260,bom00280,bom00310,bom00380,bom00620,bom00630,bom00640	Glycolysis / Gluconeogenesis|Citrate cycle (TCA cycle)|Glycine, serine and threonine metabolism|Valine, leucine and isoleucine degradation|Lysine degradation|Tryptophan metabolism|Pyruvate metabolism|Glyoxylate and dicarboxylate metabolism|Propanoate metabolism
DLG2	0	1	1	0	PREDICTED: disks large homolog 2-like [Galeopterus variegatus]	GO:1904115,GO:0016323,GO:0030054,GO:0005829,GO:0098978,GO:0044224,GO:0016020,GO:0031594,GO:0043005,GO:0005886,GO:0014069,GO:0098839,GO:0004385,GO:0035255,GO:0019900,GO:0098919,GO:0099641,GO:0098609,GO:0035865,GO:0007268,GO:0045197,GO:0010923,GO:0099645,GO:0043113,GO:0097120,GO:0099642,GO:0019233	axon cytoplasm|basolateral plasma membrane|cell junction|cytosol|glutamatergic synapse|juxtaparanode region of axon|membrane|neuromuscular junction|neuron projection|plasma membrane|postsynaptic density|postsynaptic density membrane|guanylate kinase activity|ionotropic glutamate receptor binding|kinase binding|structural constituent of postsynaptic density|anterograde axonal protein transport|cel…	bom04390,bom04530,bom05165	Hippo signaling pathway|Tight junction|Human papillomavirus infection
DLG4	0	1	0	0	disks large homolog 4 isoform X5 [Bos taurus]	GO:0032281,GO:0030054,GO:0030863,GO:0005737,GO:0005829,GO:0032839,GO:0043197,GO:0030666,GO:0005783,GO:0060076,GO:0031234,GO:0044224,GO:0031594,GO:0043005,GO:0044306,GO:0044309,GO:0005886,GO:0014069,GO:0098839,GO:0045211,GO:0045202,GO:0008021,GO:0033130,GO:0031697,GO:0031748,GO:0035255,GO:0019900,GO:0015276,GO:0097109,GO:0031812,GO:0030165,GO:0008022,GO:0019903,GO:0044877,GO:0005088,GO:0097110,GO:…	AMPA glutamate receptor complex|cell junction|cortical cytoskeleton|cytoplasm|cytosol|dendrite cytoplasm|dendritic spine|endocytic vesicle membrane|endoplasmic reticulum|excitatory synapse|extrinsic component of cytoplasmic side of plasma membrane|juxtaparanode region of axon|neuromuscular junction|neuron projection|neuron projection terminus|neuron spine|plasma membrane|postsynaptic density|post…	bom04390,bom04724,bom05016,bom05022,bom05030	Hippo signaling pathway|Glutamatergic synapse|Huntington disease|Pathways of neurodegeneration - multiple diseases|Cocaine addiction
DLGAP5	0	1	1	1	PREDICTED: disks large-associated protein 5 [Bos mutus]	GO:0005829,GO:0005815,GO:0005739,GO:0005634,GO:0031616,GO:0004721,GO:0008283,GO:0007079,GO:0045842,GO:0007221	cytosol|microtubule organizing center|mitochondrion|nucleus|spindle pole centrosome|phosphoprotein phosphatase activity|cell proliferation|mitotic chromosome movement towards spindle pole|positive regulation of mitotic metaphase/anaphase transition|positive regulation of transcription of Notch receptor target
DLK1	1	1	0	0	PREDICTED: protein delta homolog 1 [Bos mutus]	GO:0005737,GO:0005615,GO:0016021,GO:0005509,GO:0030154,GO:0045746	cytoplasm|extracellular space|integral component of membrane|calcium ion binding|cell differentiation|negative regulation of Notch signaling pathway
DLK2	1	1	0	1	Protein delta-like protein 2, partial [Bos mutus]	GO:0016021,GO:0005509,GO:0042803,GO:0045746,GO:0045598	integral component of membrane|calcium ion binding|protein homodimerization activity|negative regulation of Notch signaling pathway|regulation of fat cell differentiation
DLST	1	0	0	0	PREDICTED: dihydrolipoyllysine-residue succinyltransferase component of 2-oxoglutarate dehydrogenase complex, mitochondrial [Bos mutus]	GO:0005759,GO:0005739,GO:0005634,GO:0045252,GO:0004149,GO:0006103,GO:0106077,GO:0033512,GO:0006104,GO:0006099	mitochondrial matrix|mitochondrion|nucleus|oxoglutarate dehydrogenase complex|dihydrolipoyllysine-residue succinyltransferase activity|2-oxoglutarate metabolic process|histone succinylation|L-lysine catabolic process to acetyl-CoA via saccharopine|succinyl-CoA metabolic process|tricarboxylic acid cycle	bom00020,bom00310,bom00380	Citrate cycle (TCA cycle)|Lysine degradation|Tryptophan metabolism
DMBT1	1	0	0	0	PREDICTED: LOW QUALITY PROTEIN: deleted in malignant brain tumors 1 protein, partial [Bos mutus]
DMRT2	0	1	0	0	PREDICTED: doublesex- and mab-3-related transcription factor 2 [Bos mutus]	GO:0005634,GO:0000981,GO:0046872,GO:0042803,GO:0000977,GO:0048706,GO:2000287,GO:0045944,GO:0014807	nucleus|DNA-binding transcription factor activity, RNA polymerase II-specific|metal ion binding|protein homodimerization activity|RNA polymerase II regulatory region sequence-specific DNA binding|embryonic skeletal system development|positive regulation of myotome development|positive regulation of transcription by RNA polymerase II|regulation of somitogenesis
DMRTA1	0	1	0	0	PREDICTED: doublesex- and mab-3-related transcription factor A1 [Bison bison bison]	GO:0005634,GO:0000981,GO:0046872,GO:0042803,GO:0043565,GO:0060179,GO:0001541	nucleus|DNA-binding transcription factor activity, RNA polymerase II-specific|metal ion binding|protein homodimerization activity|sequence-specific DNA binding|male mating behavior|ovarian follicle development
DMTN	1	1	0	0	PREDICTED: dematin isoform X1 [Bos mutus]	GO:0015629,GO:0005884,GO:0031253,GO:0030863,GO:0031410,GO:0005829,GO:0012505,GO:0048471,GO:0005886,GO:0031095,GO:0014069,GO:0014731,GO:0003779,GO:0051015,GO:0043621,GO:0005102,GO:0030507,GO:0030036,GO:0051017,GO:0051693,GO:0090527,GO:0035585,GO:0035584,GO:0071277,GO:0071320,GO:0048821,GO:0030032,GO:0010812,GO:0051895,GO:0033137,GO:0010801,GO:0050732,GO:0090315,GO:1900025,GO:0030194,GO:0010763,GO:…	actin cytoskeleton|actin filament|cell projection membrane|cortical cytoskeleton|cytoplasmic vesicle|cytosol|endomembrane system|perinuclear region of cytoplasm|plasma membrane|platelet dense tubular network membrane|postsynaptic density|spectrin-associated cytoskeleton|actin binding|actin filament binding|protein self-association|signaling receptor binding|spectrin binding|actin cytoskeleton org…
DNAH17	0	1	0	0	PREDICTED: dynein heavy chain 17, axonemal [Bos mutus]	GO:0005858,GO:0030286,GO:0005874,GO:0005524,GO:0008569,GO:0045505,GO:0045503,GO:0051959,GO:0003777,GO:0060285,GO:0007018	axonemal dynein complex|dynein complex|microtubule|ATP binding|ATP-dependent microtubule motor activity, minus-end-directed|dynein intermediate chain binding|dynein light chain binding|dynein light intermediate chain binding|microtubule motor activity|cilium-dependent cell motility|microtubule-based movement	bom05014,bom05016,bom05022	Amyotrophic lateral sclerosis|Huntington disease|Pathways of neurodegeneration - multiple diseases
DNAJA4	0	0	0	1	dnaJ homolog subfamily A member 4 isoform X1 [Bos indicus x Bos taurus]	GO:0005829,GO:0016020,GO:0005524,GO:0051087,GO:0031072,GO:0046872,GO:0051082,GO:0090084,GO:0042026,GO:0009408	cytosol|membrane|ATP binding|chaperone binding|heat shock protein binding|metal ion binding|unfolded protein binding|negative regulation of inclusion body assembly|protein refolding|response to heat
DNAJC12	1	1	0	1	hypothetical protein [Bos mutus]	GO:0005737	cytoplasm
DNAJC27	0	1	0	0	PREDICTED: dnaJ homolog subfamily C member 27 isoform X1 [Bos mutus]	GO:0005634,GO:0005525,GO:0003924,GO:0006886,GO:0070374,GO:0032482,GO:0071701	nucleus|GTP binding|GTPase activity|intracellular protein transport|positive regulation of ERK1 and ERK2 cascade|Rab protein signal transduction|regulation of MAPK export from nucleus
DNAJC28	1	1	1	1	DnaJ-like protein subfamily C member 28, partial [Bos mutus]	GO:0017119,GO:0007030,GO:0048213,GO:0006890	Golgi transport complex|Golgi organization|Golgi vesicle prefusion complex stabilization|retrograde vesicle-mediated transport, Golgi to ER
DNAJC3	0	1	0	0	PREDICTED: dnaJ homolog subfamily C member 3 [Bos mutus]	GO:0005829,GO:0005783,GO:0051087,GO:0051787,GO:0019901,GO:0004860,GO:0051082,GO:0070417,GO:1903912,GO:0006469,GO:0036494,GO:0034975,GO:0006986	cytosol|endoplasmic reticulum|chaperone binding|misfolded protein binding|protein kinase binding|protein kinase inhibitor activity|unfolded protein binding|cellular response to cold|negative regulation of endoplasmic reticulum stress-induced eIF2 alpha phosphorylation|negative regulation of protein kinase activity|positive regulation of translation initiation in response to endoplasmic reticulum …	bom04141,bom05164	Protein processing in endoplasmic reticulum|Influenza A
DNAJC6	0	1	0	0	putative tyrosine-protein phosphatase auxilin isoform X1 [Bos indicus x Bos taurus]	GO:0005737,GO:0043231,GO:0014069,GO:0031982,GO:0030276,GO:0032050,GO:0019904,GO:0004725,GO:0017124,GO:0072318,GO:0072583,GO:0006898	cytoplasm|intracellular membrane-bounded organelle|postsynaptic density|vesicle|clathrin binding|clathrin heavy chain binding|protein domain specific binding|protein tyrosine phosphatase activity|SH3 domain binding|clathrin coat disassembly|clathrin-dependent endocytosis|receptor-mediated endocytosis	bom04144	Endocytosis
DNASE1L3	0	1	0	0	PREDICTED: deoxyribonuclease gamma isoform X1 [Bos mutus]	GO:0005783,GO:0005576,GO:0005634,GO:0005509,GO:0004536,GO:0004530,GO:0003677,GO:0006309,GO:0006308,GO:0000737,GO:0006259,GO:0002283,GO:0010623,GO:0002673,GO:0070948	endoplasmic reticulum|extracellular region|nucleus|calcium ion binding|deoxyribonuclease activity|deoxyribonuclease I activity|DNA binding|apoptotic DNA fragmentation|DNA catabolic process|DNA catabolic process, endonucleolytic|DNA metabolic process|neutrophil activation involved in immune response|programmed cell death involved in cell development|regulation of acute inflammatory response|regula…
DNM1	1	1	0	0	dynamin-1 [Puma concolor]	GO:0030424,GO:0005737,GO:0031410,GO:0043197,GO:0044327,GO:0070062,GO:0098978,GO:0005794,GO:0016020,GO:0030117,GO:0005874,GO:0043209,GO:0005654,GO:0005634,GO:0001917,GO:0098684,GO:0005886,GO:0014069,GO:0098844,GO:0045211,GO:0098835,GO:0045202,GO:0008021,GO:0043196,GO:0031749,GO:0005525,GO:0003924,GO:0042802,GO:0008017,GO:0050998,GO:0008022,GO:0019901,GO:0044877,GO:0003723,GO:0017124,GO:0072583,GO:…	axon|cytoplasm|cytoplasmic vesicle|dendritic spine|dendritic spine head|extracellular exosome|glutamatergic synapse|Golgi apparatus|membrane|membrane coat|microtubule|myelin sheath|nucleoplasm|nucleus|photoreceptor inner segment|photoreceptor ribbon synapse|plasma membrane|postsynaptic density|postsynaptic endocytic zone membrane|postsynaptic membrane|presynaptic endocytic zone membrane|synapse|s…	bom04072,bom04144,bom04721,bom04961,bom05100	Phospholipase D signaling pathway|Endocytosis|Synaptic vesicle cycle|Endocrine and other factor-regulated calcium reabsorption|Bacterial invasion of epithelial cells
DNMT3A	1	1	0	0	DNA (cytosine-5)-methyltransferase 3A isoform X1 [Bos indicus x Bos taurus]	GO:0000775,GO:0005737,GO:0000791,GO:0000792,GO:0005720,GO:0016363,GO:0005654,GO:0005634,GO:0001741,GO:0003682,GO:0003886,GO:0051719,GO:0003677,GO:0042802,GO:0046872,GO:0008168,GO:0000978,GO:0008134,GO:0007568,GO:0071230,GO:0071361,GO:0071456,GO:0006306,GO:0043045,GO:0043046,GO:0032776,GO:0097284,GO:0044027,GO:0010216,GO:0006346,GO:0000278,GO:0000122,GO:0030182,GO:0010942,GO:0006349,GO:0042220,GO:…	chromosome, centromeric region|cytoplasm|euchromatin|heterochromatin|nuclear heterochromatin|nuclear matrix|nucleoplasm|nucleus|XY body|chromatin binding|DNA (cytosine-5-)-methyltransferase activity|DNA (cytosine-5-)-methyltransferase activity, acting on CpN substrates|DNA binding|identical protein binding|metal ion binding|methyltransferase activity|RNA polymerase II proximal promoter sequence-s…	bom00270,bom05206	Cysteine and methionine metabolism|MicroRNAs in cancer
DOCK1	0	1	0	0	PREDICTED: dedicator of cytokinesis protein 1, partial [Bos mutus]	GO:0005737,GO:0005829,GO:0032045,GO:0016020,GO:0016607,GO:0005634,GO:0005096,GO:0005089,GO:0017124,GO:0006915,GO:0007596,GO:0016477,GO:0007010,GO:0038096,GO:0007229,GO:0006911,GO:0010634,GO:1900026,GO:0007165,GO:0007264,GO:0048010	cytoplasm|cytosol|guanyl-nucleotide exchange factor complex|membrane|nuclear speck|nucleus|GTPase activator activity|Rho guanyl-nucleotide exchange factor activity|SH3 domain binding|apoptotic process|blood coagulation|cell migration|cytoskeleton organization|Fc-gamma receptor signaling pathway involved in phagocytosis|integrin-mediated signaling pathway|phagocytosis, engulfment|positive regulati…	bom04510,bom04666,bom04810,bom05100,bom05135	Focal adhesion|Fc gamma R-mediated phagocytosis|Regulation of actin cytoskeleton|Bacterial invasion of epithelial cells|Yersinia infection
DOCK11	1	1	1	1	PREDICTED: dedicator of cytokinesis protein 11, partial [Bos mutus]	GO:0005829,GO:0005085,GO:0005089,GO:0001782,GO:0007596,GO:0002315,GO:0051491,GO:0043547,GO:0007264	cytosol|guanyl-nucleotide exchange factor activity|Rho guanyl-nucleotide exchange factor activity|B cell homeostasis|blood coagulation|marginal zone B cell differentiation|positive regulation of filopodium assembly|positive regulation of GTPase activity|small GTPase mediated signal transduction
DOCK2	1	1	0	0	PREDICTED: dedicator of cytokinesis protein 2 [Bos mutus]	GO:0005856,GO:0005829,GO:0070062,GO:0005576,GO:0016020,GO:0035580,GO:0005096,GO:0030676,GO:0042608,GO:0030036,GO:0046633,GO:0006935,GO:0001768,GO:0001771,GO:0044351,GO:0001766,GO:0002277,GO:0045060,GO:0043312,GO:0050766,GO:0045059,GO:0050690,GO:0007264	cytoskeleton|cytosol|extracellular exosome|extracellular region|membrane|specific granule lumen|GTPase activator activity|Rac guanyl-nucleotide exchange factor activity|T cell receptor binding|actin cytoskeleton organization|alpha-beta T cell proliferation|chemotaxis|establishment of T cell polarity|immunological synapse formation|macropinocytosis|membrane raft polarization|myeloid dendritic cell…	bom04062	Chemokine signaling pathway
DOCK4	0	1	0	1	PREDICTED: dedicator of cytokinesis protein 4 [Bos mutus]	GO:0005829,GO:0005794,GO:0016020,GO:0005730,GO:0005886,GO:0032420,GO:0032421,GO:0005096,GO:0005085,GO:0030165,GO:0048365,GO:0030971,GO:0017124,GO:0060326,GO:1904694,GO:1904754,GO:0007264	cytosol|Golgi apparatus|membrane|nucleolus|plasma membrane|stereocilium|stereocilium bundle|GTPase activator activity|guanyl-nucleotide exchange factor activity|PDZ domain binding|Rac GTPase binding|receptor tyrosine kinase binding|SH3 domain binding|cell chemotaxis|negative regulation of vascular smooth muscle contraction|positive regulation of vascular associated smooth muscle cell migration|sm…	bom04015	Rap1 signaling pathway
DOCK8	1	1	1	1	PREDICTED: dedicator of cytokinesis protein 8 isoform X1 [Bos mutus]	GO:0005737,GO:0005829,GO:0031258,GO:0031256,GO:0016020,GO:0005085,GO:0007596,GO:1990869,GO:0036336,GO:0001771,GO:0061485,GO:0070233,GO:1903905,GO:0043547,GO:2000406,GO:0007264	cytoplasm|cytosol|lamellipodium membrane|leading edge membrane|membrane|guanyl-nucleotide exchange factor activity|blood coagulation|cellular response to chemokine|dendritic cell migration|immunological synapse formation|memory T cell proliferation|negative regulation of T cell apoptotic process|positive regulation of establishment of T cell polarity|positive regulation of GTPase activity|positiv…
DOK4	0	1	0	0	docking protein 4 [Bos taurus]	GO:0005829,GO:0007411	cytosol|axon guidance
DPAGT1	0	1	0	0	UDP-N-acetylglucosamine--dolichyl-phosphate N-acetylglucosaminephosphotransferase isoform X1 [Bos taurus]	GO:0005789,GO:0016021,GO:0016020,GO:0008963,GO:0016757,GO:0003975,GO:0003976,GO:0019408,GO:0006488,GO:0006489,GO:0051259,GO:0006487	endoplasmic reticulum membrane|integral component of membrane|membrane|phospho-N-acetylmuramoyl-pentapeptide-transferase activity|transferase activity, transferring glycosyl groups|UDP-N-acetylglucosamine-dolichyl-phosphate N-acetylglucosaminephosphotransferase activity|UDP-N-acetylglucosamine-lysosomal-enzyme N-acetylglucosaminephosphotransferase activity|dolichol biosynthetic process|dolichol-l…	bom00510	N-Glycan biosynthesis
DPF1	1	1	0	0	PREDICTED: zinc finger protein neuro-d4 isoform X4 [Capra hircus]	GO:0005737,GO:0000123,GO:0071565,GO:0000790,GO:0005634,GO:0004402,GO:0042393,GO:0003676,GO:0008270,GO:0045892,GO:0007399,GO:0045944	cytoplasm|histone acetyltransferase complex|nBAF complex|nuclear chromatin|nucleus|histone acetyltransferase activity|histone binding|nucleic acid binding|zinc ion binding|negative regulation of transcription, DNA-templated|nervous system development|positive regulation of transcription by RNA polymerase II	bom04714,bom05225	Thermogenesis|Hepatocellular carcinoma
DPF3	0	1	0	1	zinc finger protein DPF3 isoform X3 [Bos taurus]	GO:0000123,GO:0071565,GO:0000790,GO:0005654,GO:0005634,GO:0004402,GO:0042393,GO:0003676,GO:0008270,GO:0045892,GO:0007399,GO:0045944	histone acetyltransferase complex|nBAF complex|nuclear chromatin|nucleoplasm|nucleus|histone acetyltransferase activity|histone binding|nucleic acid binding|zinc ion binding|negative regulation of transcription, DNA-templated|nervous system development|positive regulation of transcription by RNA polymerase II	bom04714,bom05225	Thermogenesis|Hepatocellular carcinoma
DPP10	1	1	0	0	inactive dipeptidyl peptidase 10 isoform X1 [Monodon monoceros]	GO:0016020,GO:0005886,GO:0008076,GO:0044325,GO:0015459,GO:0008236,GO:1903078,GO:0072659,GO:1901379	membrane|plasma membrane|voltage-gated potassium channel complex|ion channel binding|potassium channel regulator activity|serine-type peptidase activity|positive regulation of protein localization to plasma membrane|protein localization to plasma membrane|regulation of potassium ion transmembrane transport
DPP6	0	1	0	0	PREDICTED: dipeptidyl aminopeptidase-like protein 6 [Bos mutus]	GO:0005886,GO:0008076,GO:0015459,GO:0008236,GO:0072659,GO:1901379	plasma membrane|voltage-gated potassium channel complex|potassium channel regulator activity|serine-type peptidase activity|protein localization to plasma membrane|regulation of potassium ion transmembrane transport
DPT	1	1	0	0	PREDICTED: dermatopontin [Manis javanica]	GO:0005576,GO:0007155,GO:0030199,GO:0008285	extracellular region|cell adhesion|collagen fibril organization|negative regulation of cell proliferation
DPYSL4	1	0	0	0	PREDICTED: dihydropyrimidinase-related protein 4 [Bos mutus]	GO:0005737,GO:0031005,GO:0016810,GO:0051219,GO:0070997,GO:0097485	cytoplasm|filamin binding|hydrolase activity, acting on carbon-nitrogen (but not peptide) bonds|phosphoprotein binding|neuron death|neuron projection guidance
DPYSL5	1	1	0	0	PREDICTED: dihydropyrimidinase-related protein 5 [Capra hircus]	GO:0005829,GO:0030425,GO:0043025,GO:0016810,GO:0008017,GO:0007411,GO:0007399,GO:0007165	cytosol|dendrite|neuronal cell body|hydrolase activity, acting on carbon-nitrogen (but not peptide) bonds|microtubule binding|axon guidance|nervous system development|signal transduction	bom04360	Axon guidance
DSC1	0	1	0	0	PREDICTED: desmocollin-1 isoform X2 [Bos mutus]	GO:0030057,GO:0016021,GO:0005886,GO:0005509,GO:0016339,GO:0007156	desmosome|integral component of membrane|plasma membrane|calcium ion binding|calcium-dependent cell-cell adhesion via plasma membrane cell adhesion molecules|homophilic cell adhesion via plasma membrane adhesion molecules
DSG3	0	1	0	0	hypothetical protein [Bos mutus]	GO:0030057,GO:0016021,GO:0005886,GO:0005509,GO:0007156	desmosome|integral component of membrane|plasma membrane|calcium ion binding|homophilic cell adhesion via plasma membrane adhesion molecules
DSP	0	1	0	0	PREDICTED: desmoplakin isoform X1 [Bos mutus]			bom05412	Arrhythmogenic right ventricular cardiomyopathy
DTNB	0	1	0	0	dystrobrevin beta isoform X16 [Acinonyx jubatus]	GO:0005737,GO:0008270	cytoplasm|zinc ion binding
DTWD2	0	1	0	0	PREDICTED: DTW domain-containing protein 2 [Bos mutus]
DTX1	1	1	0	0	PREDICTED: E3 ubiquitin-protein ligase DTX1 [Bos mutus]	GO:0005737,GO:0005829,GO:0016604,GO:0005654,GO:0005112,GO:0017124,GO:0003713,GO:0016740,GO:0031625,GO:0008270,GO:0007166,GO:1990830,GO:0010001,GO:0045665,GO:0045581,GO:0007219,GO:0016567,GO:0008593,GO:0006366,GO:0006351	cytoplasm|cytosol|nuclear body|nucleoplasm|Notch binding|SH3 domain binding|transcription coactivator activity|transferase activity|ubiquitin protein ligase binding|zinc ion binding|cell surface receptor signaling pathway|cellular response to leukemia inhibitory factor|glial cell differentiation|negative regulation of neuron differentiation|negative regulation of T cell differentiation|Notch sign…	bom04330	Notch signaling pathway
DTX2	1	1	0	1	PREDICTED: probable E3 ubiquitin-protein ligase DTX2 isoform X1 [Bos mutus]	GO:0005737,GO:0031965,GO:0005654,GO:0016740,GO:0008270,GO:0007219,GO:0016567	cytoplasm|nuclear membrane|nucleoplasm|transferase activity|zinc ion binding|Notch signaling pathway|protein ubiquitination	bom04330	Notch signaling pathway
DTX3	0	1	0	0	probable E3 ubiquitin-protein ligase DTX3 isoform X1 [Bubalus bubalis]	GO:0005737,GO:0046872,GO:0016740,GO:0007219,GO:0016567	cytoplasm|metal ion binding|transferase activity|Notch signaling pathway|protein ubiquitination	bom04330	Notch signaling pathway
DUOX2	1	1	1	1	PREDICTED: dual oxidase 2, partial [Bos mutus]	GO:0016324,GO:0030054,GO:0016021,GO:0005509,GO:0020037,GO:0016174,GO:0004601,GO:0042335,GO:0019221,GO:0042446,GO:0050665,GO:0042744,GO:0055114,GO:0051591,GO:0006979,GO:0006590	apical plasma membrane|cell junction|integral component of membrane|calcium ion binding|heme binding|NAD(P)H oxidase activity|peroxidase activity|cuticle development|cytokine-mediated signaling pathway|hormone biosynthetic process|hydrogen peroxide biosynthetic process|hydrogen peroxide catabolic process|oxidation-reduction process|response to cAMP|response to oxidative stress|thyroid hormone gen…	bom04918	Thyroid hormone synthesis
DUOXA1	0	1	0	1	dual oxidase maturation factor 1 isoform X1 [Ovis aries]	GO:0005789,GO:0016021,GO:0005886,GO:0042743,GO:0045666,GO:2000379,GO:0015031,GO:0050727,GO:2000609	endoplasmic reticulum membrane|integral component of membrane|plasma membrane|hydrogen peroxide metabolic process|positive regulation of neuron differentiation|positive regulation of reactive oxygen species metabolic process|protein transport|regulation of inflammatory response|regulation of thyroid hormone generation
DUOXA2	1	1	1	1	dual oxidase maturation factor 2 isoform X1 [Ovis aries]	GO:0005789,GO:0016021,GO:0042743,GO:0015031,GO:0050727,GO:2000609	endoplasmic reticulum membrane|integral component of membrane|hydrogen peroxide metabolic process|protein transport|regulation of inflammatory response|regulation of thyroid hormone generation	bom04918	Thyroid hormone synthesis
DUSP1	0	1	1	1	hypothetical protein DBR06_SOUSAS13110026, partial [Sousa chinensis]			bom04010,bom04726,bom05012,bom05418	MAPK signaling pathway|Serotonergic synapse|Parkinson disease|Fluid shear stress and atherosclerosis
DUSP14	0	1	1	1	Dual specificity protein phosphatase 14 [Fukomys damarensis]	GO:0017017,GO:0004725	MAP kinase tyrosine/serine/threonine phosphatase activity|protein tyrosine phosphatase activity
DUSP16	0	1	0	0	PREDICTED: dual specificity protein phosphatase 16 [Bos mutus]	GO:0005737,GO:0031410,GO:0005829,GO:0005654,GO:0005634,GO:0017017,GO:0016791,GO:0004721,GO:0004725,GO:0008138,GO:0016311,GO:0000188,GO:0045204,GO:0045209,GO:0006470	cytoplasm|cytoplasmic vesicle|cytosol|nucleoplasm|nucleus|MAP kinase tyrosine/serine/threonine phosphatase activity|phosphatase activity|phosphoprotein phosphatase activity|protein tyrosine phosphatase activity|protein tyrosine/serine/threonine phosphatase activity|dephosphorylation|inactivation of MAPK activity|MAPK export from nucleus|MAPK phosphatase export from nucleus, leptomycin B sensitive…	bom04010	MAPK signaling pathway
DUSP4	0	1	0	0	PREDICTED: dual specificity protein phosphatase 4 [Bos mutus]	GO:0005737,GO:0005634,GO:1990439,GO:0017017,GO:0004725,GO:0008138,GO:0008330,GO:0000188,GO:0070373,GO:0035970,GO:0035335,GO:0006470	cytoplasm|nucleus|MAP kinase serine/threonine phosphatase activity|MAP kinase tyrosine/serine/threonine phosphatase activity|protein tyrosine phosphatase activity|protein tyrosine/serine/threonine phosphatase activity|protein tyrosine/threonine phosphatase activity|inactivation of MAPK activity|negative regulation of ERK1 and ERK2 cascade|peptidyl-threonine dephosphorylation|peptidyl-tyrosine dep…	bom04010	MAPK signaling pathway
DUSP5	1	0	0	0	PREDICTED: dual specificity protein phosphatase 5 [Bos mutus]	GO:0005737,GO:0005654,GO:0005634,GO:0017017,GO:0016791,GO:0004725,GO:0008138,GO:0000187,GO:0016311,GO:0000188,GO:0000165,GO:0035970,GO:0035335,GO:0006470	cytoplasm|nucleoplasm|nucleus|MAP kinase tyrosine/serine/threonine phosphatase activity|phosphatase activity|protein tyrosine phosphatase activity|protein tyrosine/serine/threonine phosphatase activity|activation of MAPK activity|dephosphorylation|inactivation of MAPK activity|MAPK cascade|peptidyl-threonine dephosphorylation|peptidyl-tyrosine dephosphorylation|protein dephosphorylation	bom04010	MAPK signaling pathway
DVL2	0	1	0	0	PREDICTED: segment polarity protein dishevelled homolog DVL-2 isoform X2 [Bos mutus]	GO:0016235,GO:0045177,GO:0005938,GO:0030136,GO:0005737,GO:0031410,GO:0005856,GO:0005829,GO:0016328,GO:0016604,GO:0005654,GO:0005634,GO:0005886,GO:0005109,GO:0042802,GO:0030674,GO:0019904,GO:0019901,GO:0043621,GO:0048365,GO:0060070,GO:0044340,GO:0034613,GO:0090103,GO:0022007,GO:0060029,GO:0007507,GO:0003007,GO:0035556,GO:0001843,GO:0035567,GO:0003151,GO:0090179,GO:0051091,GO:0043547,GO:0043507,GO:…	aggresome|apical part of cell|cell cortex|clathrin-coated vesicle|cytoplasm|cytoplasmic vesicle|cytoskeleton|cytosol|lateral plasma membrane|nuclear body|nucleoplasm|nucleus|plasma membrane|frizzled binding|identical protein binding|protein binding, bridging|protein domain specific binding|protein kinase binding|protein self-association|Rac GTPase binding|canonical Wnt signaling pathway|canonical…	bom04150,bom04310,bom04330,bom04390,bom04550,bom04916,bom04934,bom05010,bom05022,bom05165,bom05200,bom05217,bom05224,bom05225,bom05226	mTOR signaling pathway|Wnt signaling pathway|Notch signaling pathway|Hippo signaling pathway|Signaling pathways regulating pluripotency of stem cells|Melanogenesis|Cushing syndrome|Alzheimer disease|Pathways of neurodegeneration - multiple diseases|Human papillomavirus infection|Pathways in cancer|Basal cell carcinoma|Breast cancer|Hepatocellular carcinoma|Gastric cancer
DZIP1	0	1	0	0	PREDICTED: zinc finger protein DZIP1, partial [Bos mutus]	GO:0005814,GO:0036064,GO:0097539,GO:0005737,GO:0005829,GO:0005815,GO:0005654,GO:0005634,GO:0046872,GO:0003676,GO:0060271,GO:0051220,GO:0045184,GO:0007281,GO:0007275,GO:0045724,GO:0061512,GO:0043393,GO:0007224,GO:0007283	centriole|ciliary basal body|ciliary transition fiber|cytoplasm|cytosol|microtubule organizing center|nucleoplasm|nucleus|metal ion binding|nucleic acid binding|cilium assembly|cytoplasmic sequestering of protein|establishment of protein localization|germ cell development|multicellular organism development|positive regulation of cilium assembly|protein localization to cilium|regulation of protein…
E2F1	0	1	0	0	PREDICTED: transcription factor E2F1 [Bos mutus]			bom01522,bom04110,bom04137,bom04218,bom04934,bom05160,bom05161,bom05163,bom05165,bom05166,bom05167,bom05169,bom05200,bom05206,bom05207,bom05212,bom05214,bom05215,bom05218,bom05219,bom05220,bom05222,bom05223,bom05224,bom05225,bom05226	Endocrine resistance|Cell cycle|Mitophagy - animal|Cellular senescence|Cushing syndrome|Hepatitis C|Hepatitis B|Human cytomegalovirus infection|Human papillomavirus infection|Human T-cell leukemia virus 1 infection|Kaposi sarcoma-associated herpesvirus infection|Epstein-Barr virus infection|Pathways in cancer|MicroRNAs in cancer|Chemical carcinogenesis - receptor activation|Pancreatic cancer|Glio…
E2F2	0	1	0	0	PREDICTED: transcription factor E2F2 [Bos mutus]			bom01522,bom04110,bom04218,bom04934,bom05160,bom05161,bom05163,bom05166,bom05167,bom05169,bom05200,bom05206,bom05212,bom05214,bom05215,bom05218,bom05219,bom05220,bom05222,bom05223,bom05224,bom05225,bom05226	Endocrine resistance|Cell cycle|Cellular senescence|Cushing syndrome|Hepatitis C|Hepatitis B|Human cytomegalovirus infection|Human T-cell leukemia virus 1 infection|Kaposi sarcoma-associated herpesvirus infection|Epstein-Barr virus infection|Pathways in cancer|MicroRNAs in cancer|Pancreatic cancer|Glioma|Prostate cancer|Melanoma|Bladder cancer|Chronic myeloid leukemia|Small cell lung cancer|Non-s…
E2F4	0	0	0	1	PREDICTED: transcription factor E2F4 [Bos mutus]			bom04110,bom04218,bom04350	Cell cycle|Cellular senescence|TGF-beta signaling pathway
E2F7	0	0	0	1	PREDICTED: LOW QUALITY PROTEIN: transcription factor E2F7 [Bos mutus]	GO:0016607,GO:0090575,GO:0003700,GO:0000981,GO:0042802,GO:0001077,GO:0001078,GO:0000978,GO:0043565,GO:0003714,GO:0008134,GO:0060718,GO:0030330,GO:0070365,GO:0008285,GO:0032466,GO:2000134,GO:0000122,GO:0071930,GO:0001890,GO:0032877,GO:0045944,GO:0051726,GO:0002040,GO:0060707	nuclear speck|RNA polymerase II transcription factor complex|DNA-binding transcription factor activity|DNA-binding transcription factor activity, RNA polymerase II-specific|identical protein binding|proximal promoter DNA-binding transcription activator activity, RNA polymerase II-specific|proximal promoter DNA-binding transcription repressor activity, RNA polymerase II-specific|RNA polymerase II …
E2F8	1	1	1	1	PREDICTED: transcription factor E2F8 [Bos mutus]	GO:0005829,GO:0005730,GO:0090575,GO:0003700,GO:0000981,GO:0042803,GO:0001077,GO:0001078,GO:0000978,GO:0043565,GO:0003714,GO:0008134,GO:0033301,GO:0008283,GO:0060718,GO:0070365,GO:0032466,GO:0000122,GO:0001890,GO:0032877,GO:0045944,GO:0051726,GO:0002040,GO:0060707	cytosol|nucleolus|RNA polymerase II transcription factor complex|DNA-binding transcription factor activity|DNA-binding transcription factor activity, RNA polymerase II-specific|protein homodimerization activity|proximal promoter DNA-binding transcription activator activity, RNA polymerase II-specific|proximal promoter DNA-binding transcription repressor activity, RNA polymerase II-specific|RNA po…
EBF4	1	1	0	0	PREDICTED: transcription factor COE4 [Bos mutus]	GO:0005634,GO:0003677,GO:0000981,GO:0046872,GO:0046983,GO:0001077,GO:0007275,GO:0045944	nucleus|DNA binding|DNA-binding transcription factor activity, RNA polymerase II-specific|metal ion binding|protein dimerization activity|proximal promoter DNA-binding transcription activator activity, RNA polymerase II-specific|multicellular organism development|positive regulation of transcription by RNA polymerase II
EBP	1	1	1	0	3-beta-hydroxysteroid-Delta(8),Delta(7)-isomerase-like isoform X1 [Ovis aries]	GO:0031410,GO:0005783,GO:0005789,GO:0005887,GO:0005635,GO:0000247,GO:0047750,GO:0015238,GO:0004769,GO:0004888,GO:0006695,GO:0033489,GO:0033490,GO:0008203,GO:0030097,GO:0001501,GO:0016126	cytoplasmic vesicle|endoplasmic reticulum|endoplasmic reticulum membrane|integral component of plasma membrane|nuclear envelope|C-8 sterol isomerase activity|cholestenol delta-isomerase activity|drug transmembrane transporter activity|steroid delta-isomerase activity|transmembrane signaling receptor activity|cholesterol biosynthetic process|cholesterol biosynthetic process via desmosterol|cholest…	bom00100	Steroid biosynthesis
ECH1	1	1	0	1	PREDICTED: delta(3,5)-Delta(2,4)-dienoyl-CoA isomerase, mitochondrial isoform X1 [Bos mutus]	GO:0005739,GO:0005777,GO:0016853,GO:0006635	mitochondrion|peroxisome|isomerase activity|fatty acid beta-oxidation	bom04146	Peroxisome
ECHDC1	1	1	0	0	PREDICTED: ethylmalonyl-CoA decarboxylase isoform X2 [Bison bison bison]	GO:0005829,GO:0016831,GO:0004300,GO:0004492,GO:0006635	cytosol|carboxy-lyase activity|enoyl-CoA hydratase activity|methylmalonyl-CoA decarboxylase activity|fatty acid beta-oxidation	bom00640	Propanoate metabolism
ECHDC2	0	1	0	0	PREDICTED: enoyl-CoA hydratase domain-containing protein 2, mitochondrial [Bos mutus]	GO:0005739,GO:0004300,GO:0006635	mitochondrion|enoyl-CoA hydratase activity|fatty acid beta-oxidation
ECHS1	1	1	1	1	PREDICTED: enoyl-CoA hydratase, mitochondrial [Bos mutus]	GO:0005759,GO:0005739,GO:0004300,GO:0006635	mitochondrial matrix|mitochondrion|enoyl-CoA hydratase activity|fatty acid beta-oxidation	bom00062,bom00071,bom00280,bom00310,bom00380,bom00410,bom00640,bom00650	Fatty acid elongation|Fatty acid degradation|Valine, leucine and isoleucine degradation|Lysine degradation|Tryptophan metabolism|beta-Alanine metabolism|Propanoate metabolism|Butanoate metabolism
ECM1	0	1	0	0	PREDICTED: extracellular matrix protein 1 isoform X1 [Bos mutus]
ECSCR	1	1	0	0	PREDICTED: endothelial cell-specific chemotaxis regulator isoform X1 [Bison bison bison]	GO:0005829,GO:0016021,GO:0005886,GO:0001525,GO:0006915,GO:0030154,GO:0006935,GO:0016525,GO:2000353,GO:1901800	cytosol|integral component of membrane|plasma membrane|angiogenesis|apoptotic process|cell differentiation|chemotaxis|negative regulation of angiogenesis|positive regulation of endothelial cell apoptotic process|positive regulation of proteasomal protein catabolic process
ECT2	0	0	1	0	PREDICTED: protein ECT2 [Bos mutus]
EDA2R	1	1	0	0	tumor necrosis factor receptor superfamily member 27 [Bos taurus]	GO:0016021,GO:0005887,GO:0005622,GO:0005886,GO:0038023,GO:0005031,GO:0010668,GO:0008544,GO:0072332,GO:0007275,GO:0043123,GO:0046330,GO:0051092,GO:0033209	integral component of membrane|integral component of plasma membrane|intracellular|plasma membrane|signaling receptor activity|tumor necrosis factor-activated receptor activity|ectodermal cell differentiation|epidermis development|intrinsic apoptotic signaling pathway by p53 class mediator|multicellular organism development|positive regulation of I-kappaB kinase/NF-kappaB signaling|positive regul…	bom04060,bom04064	Cytokine-cytokine receptor interaction|NF-kappa B signaling pathway
EDAR	0	1	0	0	PREDICTED: LOW QUALITY PROTEIN: tumor necrosis factor receptor superfamily member EDAR [Bos mutus]	GO:0045177,GO:0016021,GO:0005886,GO:0038023,GO:0004888,GO:0006915,GO:0030154,GO:0008544,GO:0001942,GO:0042475,GO:0043473,GO:0010628,GO:0043123,GO:0046330,GO:1901224,GO:0060662,GO:0033209	apical part of cell|integral component of membrane|plasma membrane|signaling receptor activity|transmembrane signaling receptor activity|apoptotic process|cell differentiation|epidermis development|hair follicle development|odontogenesis of dentin-containing tooth|pigmentation|positive regulation of gene expression|positive regulation of I-kappaB kinase/NF-kappaB signaling|positive regulation of …	bom04060,bom04064	Cytokine-cytokine receptor interaction|NF-kappa B signaling pathway
EDEM1	0	1	0	0	PREDICTED: ER degradation-enhancing alpha-mannosidase-like protein 1 [Bos mutus]	GO:0016235,GO:0005783,GO:0044322,GO:0030176,GO:0005509,GO:0004571,GO:0051787,GO:0036498,GO:1904382,GO:1904154,GO:0036510,GO:0030433,GO:0097466	aggresome|endoplasmic reticulum|endoplasmic reticulum quality control compartment|integral component of endoplasmic reticulum membrane|calcium ion binding|mannosyl-oligosaccharide 1,2-alpha-mannosidase activity|misfolded protein binding|IRE1-mediated unfolded protein response|mannose trimming involved in glycoprotein ERAD pathway|positive regulation of retrograde protein transport, ER to cytosol|…	bom04141	Protein processing in endoplasmic reticulum
EDEM2	0	1	0	0	PREDICTED: ER degradation-enhancing alpha-mannosidase-like protein 2 isoform X1 [Bos mutus]	GO:0005783,GO:0005788,GO:0044322,GO:0016020,GO:0005509,GO:0004571,GO:1904382,GO:1904154,GO:0006986,GO:0036511,GO:0036512,GO:0036509,GO:0036510,GO:0097466	endoplasmic reticulum|endoplasmic reticulum lumen|endoplasmic reticulum quality control compartment|membrane|calcium ion binding|mannosyl-oligosaccharide 1,2-alpha-mannosidase activity|mannose trimming involved in glycoprotein ERAD pathway|positive regulation of retrograde protein transport, ER to cytosol|response to unfolded protein|trimming of first mannose on A branch|trimming of second mannos…	bom04141	Protein processing in endoplasmic reticulum
EDN1	1	1	0	1	endothelin-1 precursor [Bos taurus]	GO:0005737,GO:0005615,GO:0005125,GO:0031707,GO:0031708,GO:0005179,GO:0007193,GO:0014824,GO:0007589,GO:0001569,GO:0019722,GO:0051216,GO:0007166,GO:0009953,GO:0007507,GO:0001701,GO:0048016,GO:0042474,GO:0032269,GO:0051771,GO:0000122,GO:0014032,GO:0030185,GO:0030072,GO:0014065,GO:0031583,GO:0061051,GO:0030335,GO:0045793,GO:0051482,GO:0051091,GO:0010460,GO:0046887,GO:0043507,GO:0045840,GO:0060585,GO:…	cytoplasm|extracellular space|cytokine activity|endothelin A receptor binding|endothelin B receptor binding|hormone activity|adenylate cyclase-inhibiting G protein-coupled receptor signaling pathway|artery smooth muscle contraction|body fluid secretion|branching involved in blood vessel morphogenesis|calcium-mediated signaling|cartilage development|cell surface receptor signaling pathway|dorsal/v…	bom04024,bom04066,bom04080,bom04270,bom04668,bom04916,bom04924,bom04926,bom04933,bom05200,bom05410,bom05418	cAMP signaling pathway|HIF-1 signaling pathway|Neuroactive ligand-receptor interaction|Vascular smooth muscle contraction|TNF signaling pathway|Melanogenesis|Renin secretion|Relaxin signaling pathway|AGE-RAGE signaling pathway in diabetic complications|Pathways in cancer|Hypertrophic cardiomyopathy|Fluid shear stress and atherosclerosis
EDNRA	0	1	0	0	PREDICTED: endothelin-1 receptor [Bos mutus]	GO:0016021,GO:0005886,GO:0004962,GO:0007193,GO:0014824,GO:0001569,GO:0048484,GO:0060322,GO:0007507,GO:0001701,GO:0014032,GO:0008217,GO:0010827,GO:0007585,GO:0001666	integral component of membrane|plasma membrane|endothelin receptor activity|adenylate cyclase-inhibiting G protein-coupled receptor signaling pathway|artery smooth muscle contraction|branching involved in blood vessel morphogenesis|enteric nervous system development|head development|heart development|in utero embryonic development|neural crest cell development|regulation of blood pressure|regulat…	bom04020,bom04022,bom04024,bom04080,bom04270,bom04924,bom05200	Calcium signaling pathway|cGMP-PKG signaling pathway|cAMP signaling pathway|Neuroactive ligand-receptor interaction|Vascular smooth muscle contraction|Renin secretion|Pathways in cancer
EEF1A2	1	1	0	0	elongation factor 1-alpha 2 [Pteropus alecto]			bom03013,bom05134,bom05140	RNA transport|Legionellosis|Leishmaniasis
EFEMP2	0	1	0	0	PREDICTED: EGF-containing fibulin-like extracellular matrix protein 2 isoform X1 [Bos mutus]	GO:0005604,GO:0070062,GO:0005576,GO:1903561,GO:0005509,GO:0005201,GO:0048251	basement membrane|extracellular exosome|extracellular region|extracellular vesicle|calcium ion binding|extracellular matrix structural constituent|elastic fiber assembly
EFNA2	1	1	0	0	ephrin-A2 [Lynx canadensis]	GO:0031225,GO:0031594,GO:0043204,GO:0005886,GO:0046875,GO:0007411,GO:0046849,GO:0007267,GO:0048013,GO:0021772,GO:0030316	anchored component of membrane|neuromuscular junction|perikaryon|plasma membrane|ephrin receptor binding|axon guidance|bone remodeling|cell-cell signaling|ephrin receptor signaling pathway|olfactory bulb development|osteoclast differentiation	bom04010,bom04014,bom04015,bom04151,bom04360,bom05206	MAPK signaling pathway|Ras signaling pathway|Rap1 signaling pathway|PI3K-Akt signaling pathway|Axon guidance|MicroRNAs in cancer
EFNA3	1	1	1	1	PREDICTED: ephrin-A3, partial [Bos mutus]	GO:0031225,GO:0031226,GO:0005886,GO:0046875,GO:0005005,GO:0007411,GO:0007267,GO:0048013,GO:0016525,GO:1902961	anchored component of membrane|intrinsic component of plasma membrane|plasma membrane|ephrin receptor binding|transmembrane-ephrin receptor activity|axon guidance|cell-cell signaling|ephrin receptor signaling pathway|negative regulation of angiogenesis|positive regulation of aspartic-type endopeptidase activity involved in amyloid precursor protein catabolic process	bom04010,bom04014,bom04015,bom04151,bom04360,bom05206	MAPK signaling pathway|Ras signaling pathway|Rap1 signaling pathway|PI3K-Akt signaling pathway|Axon guidance|MicroRNAs in cancer
EFNB3	1	0	0	0	PREDICTED: ephrin-B3 [Bison bison bison]	GO:0098978,GO:0098686,GO:0005887,GO:0099061,GO:0099056,GO:0005886,GO:0046875,GO:0004713,GO:0005005,GO:0001618,GO:0007628,GO:0016198,GO:0007411,GO:0007267,GO:0048013,GO:0050771,GO:0007399,GO:0031295,GO:0099557	glutamatergic synapse|hippocampal mossy fiber to CA3 synapse|integral component of plasma membrane|integral component of postsynaptic density membrane|integral component of presynaptic membrane|plasma membrane|ephrin receptor binding|protein tyrosine kinase activity|transmembrane-ephrin receptor activity|virus receptor activity|adult walking behavior|axon choice point recognition|axon guidance|ce…	bom04360	Axon guidance
EFR3B	1	0	0	0	Protein EFR3-like protein B, partial [Bos mutus]	GO:0005829,GO:0005886,GO:0046854,GO:0072659	cytosol|plasma membrane|phosphatidylinositol phosphorylation|protein localization to plasma membrane
EGLN1	1	1	0	1	PREDICTED: egl nine homolog 1 [Bos mutus]			bom04066,bom05200,bom05211	HIF-1 signaling pathway|Pathways in cancer|Renal cell carcinoma
EGLN3	1	1	1	1	egl nine homolog 3 [Bos taurus]	GO:0005737,GO:0005829,GO:0005654,GO:0005634,GO:0005506,GO:0031418,GO:0016706,GO:0031545,GO:0006919,GO:0006915,GO:0006974,GO:0018401,GO:0018126,GO:0042127,GO:0043523,GO:0061418,GO:0001666	cytoplasm|cytosol|nucleoplasm|nucleus|iron ion binding|L-ascorbic acid binding|oxidoreductase activity, acting on paired donors, with incorporation or reduction of molecular oxygen, 2-oxoglutarate as one donor, and incorporation of one atom each of oxygen into both donors|peptidyl-proline 4-dioxygenase activity|activation of cysteine-type endopeptidase activity involved in apoptotic process|apopt…	bom04066,bom05200,bom05211	HIF-1 signaling pathway|Pathways in cancer|Renal cell carcinoma
EGR1	1	1	1	1	PREDICTED: LOW QUALITY PROTEIN: early growth response protein 1 [Bos mutus]	GO:0005737,GO:0005634,GO:0000981,GO:0010385,GO:0044729,GO:1990841,GO:0043565,GO:0008270,GO:0071504,GO:0098759,GO:0071506,GO:0044849,GO:0072110,GO:0045080,GO:0072303,GO:0046886,GO:0050725,GO:0045944,GO:2000182,GO:0006357,GO:0001666,GO:0002931	cytoplasm|nucleus|DNA-binding transcription factor activity, RNA polymerase II-specific|double-stranded methylated DNA binding|hemi-methylated DNA-binding|promoter-specific chromatin binding|sequence-specific DNA binding|zinc ion binding|cellular response to heparin|cellular response to interleukin-8|cellular response to mycophenolic acid|estrous cycle|glomerular mesangial cell proliferation|posi…	bom04371,bom04912,bom04928,bom04933,bom05020,bom05166	Apelin signaling pathway|GnRH signaling pathway|Parathyroid hormone synthesis, secretion and action|AGE-RAGE signaling pathway in diabetic complications|Prion disease|Human T-cell leukemia virus 1 infection
EHD2	0	1	0	0	EH domain-containing protein 2 isoform X1 [Monodon monoceros]	GO:0005901,GO:0005829,GO:0010008,GO:0070062,GO:0019898,GO:0045171,GO:0015630,GO:0005634,GO:0048471,GO:0005886,GO:0055038,GO:0005524,GO:0005509,GO:0005525,GO:0016787,GO:0042802,GO:0003676,GO:0019904,GO:0007596,GO:0030866,GO:0032456,GO:0006897,GO:0097320,GO:2001137,GO:1901741,GO:0072659	caveola|cytosol|endosome membrane|extracellular exosome|extrinsic component of membrane|intercellular bridge|microtubule cytoskeleton|nucleus|perinuclear region of cytoplasm|plasma membrane|recycling endosome membrane|ATP binding|calcium ion binding|GTP binding|hydrolase activity|identical protein binding|nucleic acid binding|protein domain specific binding|blood coagulation|cortical actin cytosk…	bom04144	Endocytosis
EIF2AK2	0	0	0	1	hypothetical protein [Bos mutus]			bom04141,bom04217,bom05010,bom05160,bom05162,bom05164,bom05165,bom05167,bom05168,bom05169,bom05171,bom05203	Protein processing in endoplasmic reticulum|Necroptosis|Alzheimer disease|Hepatitis C|Measles|Influenza A|Human papillomavirus infection|Kaposi sarcoma-associated herpesvirus infection|Herpes simplex virus 1 infection|Epstein-Barr virus infection|Coronavirus disease - COVID-19|Viral carcinogenesis
EIF4A1	0	0	0	1	eukaryotic initiation factor 4A-I [Bos taurus]	GO:0005737,GO:0005829,GO:0016281,GO:0070062,GO:0016020,GO:0005524,GO:0004004,GO:0003725,GO:0004386,GO:0003729,GO:0003723,GO:0000339,GO:0008135,GO:0003743,GO:0006413,GO:0016032	cytoplasm|cytosol|eukaryotic translation initiation factor 4F complex|extracellular exosome|membrane|ATP binding|ATP-dependent RNA helicase activity|double-stranded RNA binding|helicase activity|mRNA binding|RNA binding|RNA cap binding|translation factor activity, RNA binding|translation initiation factor activity|translational initiation|viral process	bom03013	RNA transport
ELAVL3	1	1	0	0	PREDICTED: ELAV-like protein 3 [Bos mutus]	GO:0017091,GO:0030154,GO:0007399	AU-rich element binding|cell differentiation|nervous system development
ELAVL4	1	1	0	0	ELAV-like protein 4 [Rattus norvegicus]	GO:0005737,GO:0005856,GO:0005829,GO:0030425,GO:0098978,GO:0030426,GO:0016020,GO:0043025,GO:0005635,GO:0005634,GO:0042788,GO:0017091,GO:0003730,GO:0003729,GO:0045182,GO:0007568,GO:0008306,GO:1990090,GO:0007399,GO:0030182,GO:1900006,GO:0031099,GO:0043488,GO:0099547,GO:0042220,GO:0034976	cytoplasm|cytoskeleton|cytosol|dendrite|glutamatergic synapse|growth cone|membrane|neuronal cell body|nuclear envelope|nucleus|polysomal ribosome|AU-rich element binding|mRNA 3'-UTR binding|mRNA binding|translation regulator activity|aging|associative learning|cellular response to nerve growth factor stimulus|nervous system development|neuron differentiation|positive regulation of dendrite develo…
ELN	1	1	0	0	PREDICTED: elastin [Bos mutus]
ELOVL5	0	1	0	1	PREDICTED: LOW QUALITY PROTEIN: elongation of very long chain fatty acids protein 5 [Bos mutus]	GO:0030425,GO:0097447,GO:0030176,GO:0043025,GO:0102336,GO:0102337,GO:0102338,GO:0009922,GO:0102756,GO:0034625,GO:0034626,GO:0019367,GO:0042759,GO:0035338,GO:0045723,GO:0030148,GO:0006636,GO:0042761	dendrite|dendritic tree|integral component of endoplasmic reticulum membrane|neuronal cell body|3-oxo-arachidoyl-CoA synthase activity|3-oxo-cerotoyl-CoA synthase activity|3-oxo-lignoceronyl-CoA synthase activity|fatty acid elongase activity|very-long-chain 3-ketoacyl-CoA synthase activity|fatty acid elongation, monounsaturated fatty acid|fatty acid elongation, polyunsaturated fatty acid|fatty ac…	bom00062,bom01040	Fatty acid elongation|Biosynthesis of unsaturated fatty acids
ELP2	0	1	0	0	PREDICTED: elongator complex protein 2 isoform X1 [Bos mutus]	GO:0005737,GO:0005829,GO:0033588,GO:0008023,GO:0019901,GO:0046425,GO:0006357,GO:0006368,GO:0002098	cytoplasm|cytosol|Elongator holoenzyme complex|transcription elongation factor complex|protein kinase binding|regulation of JAK-STAT cascade|regulation of transcription by RNA polymerase II|transcription elongation from RNA polymerase II promoter|tRNA wobble uridine modification
EMB	1	1	0	0	PREDICTED: embigin [Bos mutus]	GO:0030424,GO:0030054,GO:0005887,GO:0005886,GO:0045202,GO:0098632,GO:0008028,GO:0007411,GO:0070593,GO:0007156,GO:0035879	axon|cell junction|integral component of plasma membrane|plasma membrane|synapse|cell-cell adhesion mediator activity|monocarboxylic acid transmembrane transporter activity|axon guidance|dendrite self-avoidance|homophilic cell adhesion via plasma membrane adhesion molecules|plasma membrane lactate transport
EMCN	0	1	0	0	PREDICTED: endomucin [Bos mutus]	GO:0005576,GO:0016021,GO:0005886	extracellular region|integral component of membrane|plasma membrane
EMID1	1	1	0	1	PREDICTED: EMI domain-containing protein 1 isoform X1 [Bos mutus]	GO:0005581,GO:0005783,GO:0031012,GO:0005794,GO:0010811	collagen trimer|endoplasmic reticulum|extracellular matrix|Golgi apparatus|positive regulation of cell-substrate adhesion
EMILIN1	0	1	0	0	PREDICTED: EMILIN-1 [Bos mutus]	GO:0005581,GO:0062023,GO:1990971,GO:0070062,GO:0031012,GO:0005576,GO:0005615,GO:0034668,GO:0030023,GO:0042802,GO:0098640,GO:0003180,GO:0007155,GO:0016477,GO:0007160,GO:0048251,GO:0016525,GO:0050866,GO:0032966,GO:1904027,GO:0070373,GO:0010629,GO:1905522,GO:0060394,GO:0030512,GO:0030948,GO:0010811,GO:1901203,GO:0010628,GO:0070207	collagen trimer|collagen-containing extracellular matrix|EMILIN complex|extracellular exosome|extracellular matrix|extracellular region|extracellular space|integrin alpha4-beta1 complex|extracellular matrix constituent conferring elasticity|identical protein binding|integrin binding involved in cell-matrix adhesion|aortic valve morphogenesis|cell adhesion|cell migration|cell-matrix adhesion|elast…
EMILIN2	1	1	0	0	PREDICTED: EMILIN-2 [Bos mutus]	GO:0005581,GO:0062023,GO:0031012,GO:0005576,GO:0030023,GO:0007155,GO:0010811	collagen trimer|collagen-containing extracellular matrix|extracellular matrix|extracellular region|extracellular matrix constituent conferring elasticity|cell adhesion|positive regulation of cell-substrate adhesion
EMILIN3	1	1	0	0	PREDICTED: LOW QUALITY PROTEIN: EMILIN-3 [Bos mutus]	GO:0005737,GO:0031012,GO:0005201,GO:0010811	cytoplasm|extracellular matrix|extracellular matrix structural constituent|positive regulation of cell-substrate adhesion
EML1	0	1	0	0	PREDICTED: echinoderm microtubule-associated protein-like 1 isoform X1 [Bos mutus]	GO:0005829,GO:0005874,GO:0005875,GO:0015630,GO:1990023,GO:0097431,GO:0048471,GO:0005509,GO:0008017,GO:0015631,GO:0007420,GO:0002244,GO:0000226,GO:0007052,GO:0007405	cytosol|microtubule|microtubule associated complex|microtubule cytoskeleton|mitotic spindle midzone|mitotic spindle pole|perinuclear region of cytoplasm|calcium ion binding|microtubule binding|tubulin binding|brain development|hematopoietic progenitor cell differentiation|microtubule cytoskeleton organization|mitotic spindle organization|neuroblast proliferation
EML2	1	1	0	1	PREDICTED: echinoderm microtubule-associated protein-like 2 isoform X1 [Capra hircus]	GO:0005737,GO:0005874,GO:0005875,GO:0015630,GO:0005819,GO:0008017,GO:0008022,GO:0005102,GO:0015631,GO:0031115,GO:0010968,GO:0007605,GO:0007601	cytoplasm|microtubule|microtubule associated complex|microtubule cytoskeleton|spindle|microtubule binding|protein C-terminus binding|signaling receptor binding|tubulin binding|negative regulation of microtubule polymerization|regulation of microtubule nucleation|sensory perception of sound|visual perception
EML4	1	1	1	1	echinoderm microtubule-associated protein-like 4 [Bos taurus]			bom05200,bom05223,bom05235	Pathways in cancer|Non-small cell lung cancer|PD-L1 expression and PD-1 checkpoint pathway in cancer
EML5	0	1	0	1	PREDICTED: echinoderm microtubule-associated protein-like 5 [Bos mutus]	GO:0005737,GO:0070062,GO:0005874,GO:0015630,GO:0003824,GO:0008017	cytoplasm|extracellular exosome|microtubule|microtubule cytoskeleton|catalytic activity|microtubule binding
EMP1	1	1	0	1	PREDICTED: epithelial membrane protein 1 [Bos mutus]	GO:0016021	integral component of membrane
EMP3	1	1	0	0	epithelial membrane protein 3 isoform X1 [Odocoileus virginianus texanus]	GO:0016021,GO:0005886,GO:0032060,GO:0008219	integral component of membrane|plasma membrane|bleb assembly|cell death
ENDOU	0	1	1	0	hypothetical protein [Bos mutus]	GO:0005737,GO:0005576,GO:0004521,GO:0046872,GO:0030247,GO:0003723,GO:0005044,GO:0008236,GO:0007565,GO:0006955	cytoplasm|extracellular region|endoribonuclease activity|metal ion binding|polysaccharide binding|RNA binding|scavenger receptor activity|serine-type peptidase activity|female pregnancy|immune response
ENO2	1	1	0	1	gamma-enolase isoform X1 [Globicephala melas]	GO:0005829,GO:0070062,GO:0005615,GO:0016020,GO:0043209,GO:0043204,GO:0000015,GO:0001917,GO:0005886,GO:0000287,GO:0004634,GO:0061621,GO:0006094,GO:0006096	cytosol|extracellular exosome|extracellular space|membrane|myelin sheath|perikaryon|phosphopyruvate hydratase complex|photoreceptor inner segment|plasma membrane|magnesium ion binding|phosphopyruvate hydratase activity|canonical glycolysis|gluconeogenesis|glycolytic process	bom00010,bom03018,bom04066	Glycolysis / Gluconeogenesis|RNA degradation|HIF-1 signaling pathway
ENOX2	0	1	0	0	ecto-NOX disulfide-thiol exchanger 2 isoform X1 [Neophocaena asiaeorientalis asiaeorientalis]	GO:0005829,GO:0009897,GO:0005615,GO:0003676,GO:0015035,GO:0055114,GO:0040008,GO:0007624	cytosol|external side of plasma membrane|extracellular space|nucleic acid binding|protein disulfide oxidoreductase activity|oxidation-reduction process|regulation of growth|ultradian rhythm
ENPP2	1	1	0	0	PREDICTED: ectonucleotide pyrophosphatase/phosphodiesterase family member 2 [Bos mutus]	GO:0005737,GO:0005615,GO:0005794,GO:0047391,GO:0005509,GO:0004622,GO:0003676,GO:0004551,GO:0004528,GO:0030247,GO:0005044,GO:0008270,GO:0060326,GO:0071276,GO:0071392,GO:0021536,GO:0044849,GO:0030900,GO:0006955,GO:0030901,GO:0001953,GO:0034638,GO:0009395,GO:0008284,GO:0010634,GO:0051894,GO:2000394,GO:0048714,GO:0050731,GO:1900026,GO:0045765,GO:0030334,GO:1903165	cytoplasm|extracellular space|Golgi apparatus|alkylglycerophosphoethanolamine phosphodiesterase activity|calcium ion binding|lysophospholipase activity|nucleic acid binding|nucleotide diphosphatase activity|phosphodiesterase I activity|polysaccharide binding|scavenger receptor activity|zinc ion binding|cell chemotaxis|cellular response to cadmium ion|cellular response to estradiol stimulus|dience…	bom00565	Ether lipid metabolism
ENPP3	0	1	0	1	hypothetical protein [Bos mutus]	GO:0016324,GO:0009897,GO:0005576,GO:0016021,GO:0048471,GO:0005509,GO:0035529,GO:0003676,GO:0047429,GO:0004528,GO:0030247,GO:0005044,GO:0008270,GO:0046034,GO:0002276,GO:0050728,GO:0033007,GO:0070667,GO:0009143,GO:0006220	apical plasma membrane|external side of plasma membrane|extracellular region|integral component of membrane|perinuclear region of cytoplasm|calcium ion binding|NADH pyrophosphatase activity|nucleic acid binding|nucleoside-triphosphate diphosphatase activity|phosphodiesterase I activity|polysaccharide binding|scavenger receptor activity|zinc ion binding|ATP metabolic process|basophil activation in…	bom00230,bom00240,bom00500,bom00740,bom00760,bom00770	Purine metabolism|Pyrimidine metabolism|Starch and sucrose metabolism|Riboflavin metabolism|Nicotinate and nicotinamide metabolism|Pantothenate and CoA biosynthesis
ENTHD2	0	0	0	1	PREDICTED: AP-4 complex accessory subunit tepsin [Bos mutus]	GO:0030124,GO:0030662,GO:0005737,GO:0005829,GO:0031312,GO:0005794,GO:0031965,GO:0016607,GO:0032588	AP-4 adaptor complex|coated vesicle membrane|cytoplasm|cytosol|extrinsic component of organelle membrane|Golgi apparatus|nuclear membrane|nuclear speck|trans-Golgi network membrane
ENTPD5	1	1	1	1	PREDICTED: ectonucleoside triphosphate diphosphohydrolase 5 [Bos mutus]	GO:0005783,GO:0005576,GO:0004382,GO:0045134,GO:0051084,GO:0046034,GO:0008283,GO:0045821,GO:0006487,GO:0014066	endoplasmic reticulum|extracellular region|guanosine-diphosphatase activity|uridine-diphosphatase activity|'de novo' posttranslational protein folding|ATP metabolic process|cell proliferation|positive regulation of glycolytic process|protein N-linked glycosylation|regulation of phosphatidylinositol 3-kinase signaling	bom00230,bom00240	Purine metabolism|Pyrimidine metabolism
ENTPD7	0	1	0	0	PREDICTED: ectonucleoside triphosphate diphosphohydrolase 7 [Bos mutus]	GO:0030666,GO:0016021,GO:0046872,GO:0017111,GO:0034656	endocytic vesicle membrane|integral component of membrane|metal ion binding|nucleoside-triphosphatase activity|nucleobase-containing small molecule catabolic process
EPAS1	1	1	0	0	PREDICTED: endothelial PAS domain-containing protein 1 [Bos mutus]	GO:0005829,GO:0016607,GO:0005654,GO:0005634,GO:0005667,GO:0003677,GO:0000981,GO:0035035,GO:0046982,GO:0001077,GO:0043565,GO:0008134,GO:0001525,GO:0001974,GO:0048469,GO:0071456,GO:0001892,GO:0030218,GO:0055072,GO:0030324,GO:0007005,GO:0048625,GO:0042415,GO:0120162,GO:0045944,GO:0043687,GO:0002027,GO:0006357,GO:0061418,GO:0043619,GO:0001666,GO:0007165,GO:0043129,GO:0006366,GO:0007601	cytosol|nuclear speck|nucleoplasm|nucleus|transcription factor complex|DNA binding|DNA-binding transcription factor activity, RNA polymerase II-specific|histone acetyltransferase binding|protein heterodimerization activity|proximal promoter DNA-binding transcription activator activity, RNA polymerase II-specific|sequence-specific DNA binding|transcription factor binding|angiogenesis|blood vessel …	bom05200,bom05211	Pathways in cancer|Renal cell carcinoma
EPB41L2	0	1	0	0	PREDICTED: band 4.1-like protein 2 [Bos mutus]	GO:0099738,GO:0030054,GO:0005829,GO:0070062,GO:0005925,GO:0005654,GO:0005634,GO:0005886,GO:0008091,GO:0003779,GO:0042731,GO:0030507,GO:0005198,GO:0031032,GO:0007049,GO:0051301,GO:0030866,GO:1904778	cell cortex region|cell junction|cytosol|extracellular exosome|focal adhesion|nucleoplasm|nucleus|plasma membrane|spectrin|actin binding|PH domain binding|spectrin binding|structural molecule activity|actomyosin structure organization|cell cycle|cell division|cortical actin cytoskeleton organization|positive regulation of protein localization to cell cortex
EPB41L3	0	1	0	0	PREDICTED: band 4.1-like protein 3 [Bos mutus]
EPB41L4A	1	1	0	1	PREDICTED: band 4.1-like protein 4A [Bos mutus]	GO:0005737,GO:0005856,GO:0008092,GO:0031032	cytoplasm|cytoskeleton|cytoskeletal protein binding|actomyosin structure organization
EPB41L4B	1	1	0	1	PREDICTED: band 4.1-like protein 4B [Bos mutus]	GO:0045177,GO:0005923,GO:0005737,GO:0005856,GO:0005829,GO:0005886,GO:0008092,GO:0005200,GO:0031032,GO:0045785,GO:0010628,GO:0051549,GO:0042060	apical part of cell|bicellular tight junction|cytoplasm|cytoskeleton|cytosol|plasma membrane|cytoskeletal protein binding|structural constituent of cytoskeleton|actomyosin structure organization|positive regulation of cell adhesion|positive regulation of gene expression|positive regulation of keratinocyte migration|wound healing	bom04530	Tight junction
EPHB2	0	1	0	0	ephrin type-B receptor 2 isoform X1 [Nomascus leucogenys]	GO:0030424,GO:0005737,GO:0005829,GO:0030425,GO:0005576,GO:0098978,GO:0005887,GO:0099055,GO:0099056,GO:0043005,GO:0043025,GO:0005634,GO:0005886,GO:0098794,GO:0043235,GO:0001540,GO:0005524,GO:0008046,GO:0042802,GO:0004713,GO:0044877,GO:0005102,GO:0004714,GO:0004888,GO:0005005,GO:0001525,GO:0007411,GO:0007413,GO:0048593,GO:0030154,GO:0021952,GO:0071679,GO:0022038,GO:0060996,GO:0060997,GO:0048013,GO:…	axon|cytoplasm|cytosol|dendrite|extracellular region|glutamatergic synapse|integral component of plasma membrane|integral component of postsynaptic membrane|integral component of presynaptic membrane|neuron projection|neuronal cell body|nucleus|plasma membrane|postsynapse|receptor complex|amyloid-beta binding|ATP binding|axon guidance receptor activity|identical protein binding|protein tyrosine k…	bom04360	Axon guidance
EPHB6	0	0	0	1	PREDICTED: LOW QUALITY PROTEIN: ephrin type-B receptor 6 [Bos mutus]			bom04360	Axon guidance
EPHX2	1	0	0	0	PREDICTED: bifunctional epoxide hydrolase 2 [Bos mutus]	GO:0005777,GO:0033885,GO:0004301,GO:0042577,GO:0000287,GO:0015643,GO:0019439,GO:0042632,GO:0046839,GO:0009636	peroxisome|10-hydroxy-9-(phosphonooxy)octadecanoate phosphatase activity|epoxide hydrolase activity|lipid phosphatase activity|magnesium ion binding|toxic substance binding|aromatic compound catabolic process|cholesterol homeostasis|phospholipid dephosphorylation|response to toxic substance	bom00590,bom04146,bom05207	Arachidonic acid metabolism|Peroxisome|Chemical carcinogenesis - receptor activation
EPN3	0	1	1	1	PREDICTED: epsin-3 [Bos mutus]	GO:0005905,GO:0030136,GO:0070062,GO:0019897,GO:0043231,GO:0005654,GO:0005634,GO:0048471,GO:1990175,GO:0008289	clathrin-coated pit|clathrin-coated vesicle|extracellular exosome|extrinsic component of plasma membrane|intracellular membrane-bounded organelle|nucleoplasm|nucleus|perinuclear region of cytoplasm|EH domain binding|lipid binding	bom04144	Endocytosis
EPOR	0	1	0	0	PREDICTED: erythropoietin receptor [Bos mutus]	GO:0016021,GO:0004900,GO:0042802,GO:0007420,GO:0046697,GO:0007507	integral component of membrane|erythropoietin receptor activity|identical protein binding|brain development|decidualization|heart development	bom04060,bom04151,bom04630,bom04640,bom05200	Cytokine-cytokine receptor interaction|PI3K-Akt signaling pathway|JAK-STAT signaling pathway|Hematopoietic cell lineage|Pathways in cancer
ERC2	1	1	0	0	ERC protein 2 isoform X12 [Bos indicus x Bos taurus]	GO:0030054,GO:0005856,GO:0098982,GO:0098978,GO:0030426,GO:0048786,GO:0098831,GO:0042734,GO:0098882,GO:0016082	cell junction|cytoskeleton|GABA-ergic synapse|glutamatergic synapse|growth cone|presynaptic active zone|presynaptic active zone cytoplasmic component|presynaptic membrane|structural constituent of presynaptic active zone|synaptic vesicle priming
ERGIC1	0	1	0	0	PREDICTED: endoplasmic reticulum-Golgi intermediate compartment protein 1, partial [Bos mutus]	GO:0005789,GO:0005793,GO:0033116,GO:0000139,GO:0016021,GO:0043231,GO:0016020,GO:0005654,GO:0006888,GO:0006890	endoplasmic reticulum membrane|endoplasmic reticulum-Golgi intermediate compartment|endoplasmic reticulum-Golgi intermediate compartment membrane|Golgi membrane|integral component of membrane|intracellular membrane-bounded organelle|membrane|nucleoplasm|ER to Golgi vesicle-mediated transport|retrograde vesicle-mediated transport, Golgi to ER
ERLIN1	0	1	1	1	erlin-1 [Bos taurus]	GO:0005783,GO:0005789,GO:0016021,GO:0032991,GO:0015485,GO:0031625,GO:0008203,GO:0045541,GO:0045717,GO:0032933,GO:0030433	endoplasmic reticulum|endoplasmic reticulum membrane|integral component of membrane|protein-containing complex|cholesterol binding|ubiquitin protein ligase binding|cholesterol metabolic process|negative regulation of cholesterol biosynthetic process|negative regulation of fatty acid biosynthetic process|SREBP signaling pathway|ubiquitin-dependent ERAD pathway
ERMP1	0	1	1	0	PREDICTED: endoplasmic reticulum metallopeptidase 1 [Bos mutus]	GO:0005789,GO:0016021,GO:0016020,GO:0046872,GO:0008237	endoplasmic reticulum membrane|integral component of membrane|membrane|metal ion binding|metallopeptidase activity
ERO1A	0	1	0	0	PREDICTED: ERO1-like protein alpha [Bos mutus]	GO:0005789,GO:0016671,GO:0003756,GO:0015035,GO:0019471,GO:0050873,GO:0045454,GO:0051085,GO:0030968,GO:0030198,GO:0070059,GO:0034975,GO:0022417,GO:0051209,GO:0034976	endoplasmic reticulum membrane|oxidoreductase activity, acting on a sulfur group of donors, disulfide as acceptor|protein disulfide isomerase activity|protein disulfide oxidoreductase activity|4-hydroxyproline metabolic process|brown fat cell differentiation|cell redox homeostasis|chaperone cofactor-dependent protein refolding|endoplasmic reticulum unfolded protein response|extracellular matrix o…	bom04141,bom05417	Protein processing in endoplasmic reticulum|Lipid and atherosclerosis
ESM1	1	1	0	0	endothelial cell-specific molecule 1 precursor [Bos taurus]	GO:0005576,GO:0005171,GO:0005520,GO:0005178,GO:0001525,GO:0008284,GO:1902204,GO:0001558,GO:0002040	extracellular region|hepatocyte growth factor receptor binding|insulin-like growth factor binding|integrin binding|angiogenesis|positive regulation of cell proliferation|positive regulation of hepatocyte growth factor receptor signaling pathway|regulation of cell growth|sprouting angiogenesis
ESPL1	0	1	0	0	PREDICTED: separin [Bos mutus]	GO:0005813,GO:0005737,GO:0005829,GO:0072686,GO:0005634,GO:0003824,GO:0004197,GO:0008234,GO:0006915,GO:0040001,GO:0045143,GO:0051307,GO:0000212,GO:0000281,GO:0000070,GO:0045875,GO:0045842	centrosome|cytoplasm|cytosol|mitotic spindle|nucleus|catalytic activity|cysteine-type endopeptidase activity|cysteine-type peptidase activity|apoptotic process|establishment of mitotic spindle localization|homologous chromosome segregation|meiotic chromosome separation|meiotic spindle organization|mitotic cytokinesis|mitotic sister chromatid segregation|negative regulation of sister chromatid coh…	bom04110,bom04114,bom05166	Cell cycle|Oocyte meiosis|Human T-cell leukemia virus 1 infection
ESPN	1	1	0	1	PREDICTED: espin, partial [Bos mutus]	GO:0005903,GO:0005737,GO:0031941,GO:0005902,GO:0032426,GO:0051015,GO:0017124,GO:0051017,GO:0007626,GO:0051494,GO:0030046,GO:0051491,GO:0007605	brush border|cytoplasm|filamentous actin|microvillus|stereocilium tip|actin filament binding|SH3 domain binding|actin filament bundle assembly|locomotory behavior|negative regulation of cytoskeleton organization|parallel actin filament bundle assembly|positive regulation of filopodium assembly|sensory perception of sound
ESYT3	0	1	1	1	PREDICTED: extended synaptotagmin-3 [Bos mutus]	GO:0005789,GO:0031234,GO:0005887,GO:0031227,GO:0044232,GO:0005509,GO:0005544,GO:0031210,GO:0008429,GO:0035091,GO:0061817,GO:0006869	endoplasmic reticulum membrane|extrinsic component of cytoplasmic side of plasma membrane|integral component of plasma membrane|intrinsic component of endoplasmic reticulum membrane|organelle membrane contact site|calcium ion binding|calcium-dependent phospholipid binding|phosphatidylcholine binding|phosphatidylethanolamine binding|phosphatidylinositol binding|endoplasmic reticulum-plasma membran…
ETFA	1	1	1	1	PREDICTED: electron transfer flavoprotein subunit alpha, mitochondrial [Capra hircus]	GO:0005759,GO:0005739,GO:0009055,GO:0050660,GO:0016491,GO:0033539	mitochondrial matrix|mitochondrion|electron transfer activity|flavin adenine dinucleotide binding|oxidoreductase activity|fatty acid beta-oxidation using acyl-CoA dehydrogenase
ETFB	1	0	0	0	electron transfer flavoprotein subunit beta isoform X1 [Rhinolophus ferrumequinum]	GO:0005829,GO:0005759,GO:0009055,GO:0000166,GO:0033539	cytosol|mitochondrial matrix|electron transfer activity|nucleotide binding|fatty acid beta-oxidation using acyl-CoA dehydrogenase
ETFDH	1	1	1	1	electron transfer flavoprotein-ubiquinone oxidoreductase, mitochondrial precursor [Bos taurus]	GO:0031305,GO:0051539,GO:0009055,GO:0004174,GO:0046872,GO:0043783,GO:0048039,GO:0033539,GO:0006979	integral component of mitochondrial inner membrane|4 iron, 4 sulfur cluster binding|electron transfer activity|electron-transferring-flavoprotein dehydrogenase activity|metal ion binding|oxidoreductase activity, oxidizing metal ions with flavin as acceptor|ubiquinone binding|fatty acid beta-oxidation using acyl-CoA dehydrogenase|response to oxidative stress
ETHE1	1	0	0	1	PREDICTED: persulfide dioxygenase ETHE1, mitochondrial isoform X1 [Bos mutus]	GO:0005759,GO:0005739,GO:0005654,GO:0016788,GO:0005506,GO:0050313,GO:0006749,GO:0070813	mitochondrial matrix|mitochondrion|nucleoplasm|hydrolase activity, acting on ester bonds|iron ion binding|sulfur dioxygenase activity|glutathione metabolic process|hydrogen sulfide metabolic process	bom00920	Sulfur metabolism
ETS2	1	1	1	1	PREDICTED: protein C-ets-2 [Bos mutus]	GO:0005634,GO:0000981,GO:0043565,GO:0030154,GO:0006357	nucleus|DNA-binding transcription factor activity, RNA polymerase II-specific|sequence-specific DNA binding|cell differentiation|regulation of transcription by RNA polymerase II	bom04014,bom05166	Ras signaling pathway|Human T-cell leukemia virus 1 infection
ETV1	1	1	0	0	ETS translocation variant 1 isoform X6 [Bos taurus]	GO:0005634,GO:0000981,GO:0001077,GO:0000978,GO:0007411,GO:0030154,GO:0007638,GO:0007517,GO:0048935,GO:0006357,GO:0006366	nucleus|DNA-binding transcription factor activity, RNA polymerase II-specific|proximal promoter DNA-binding transcription activator activity, RNA polymerase II-specific|RNA polymerase II proximal promoter sequence-specific DNA binding|axon guidance|cell differentiation|mechanosensory behavior|muscle organ development|peripheral nervous system neuron development|regulation of transcription by RNA …	bom05202	Transcriptional misregulation in cancer
ETV4	1	1	0	1	ETS translocation variant 4 isoform X1 [Bos taurus]			bom05202	Transcriptional misregulation in cancer
EVA1B	0	1	0	0	PREDICTED: protein eva-1 homolog B [Bos mutus]	GO:0016021	integral component of membrane
EVA1C	0	1	0	1	PREDICTED: protein eva-1 homolog C, partial [Bos mutus]	GO:0016021,GO:0030246,GO:0008201	integral component of membrane|carbohydrate binding|heparin binding
EVI2A	0	1	0	0	PREDICTED: protein EVI2A [Bos mutus]	GO:0016021,GO:0004888	integral component of membrane|transmembrane signaling receptor activity
EVI2B	1	1	0	0	PREDICTED: protein EVI2B [Bos mutus]	GO:0005887,GO:0061515,GO:0043066,GO:0071157,GO:0030854,GO:0045660,GO:2000035	integral component of plasma membrane|myeloid cell development|negative regulation of apoptotic process|negative regulation of cell cycle arrest|positive regulation of granulocyte differentiation|positive regulation of neutrophil differentiation|regulation of stem cell division
EXOC8	0	1	0	0	exocyst complex component 8 [Bos taurus]	GO:0005829,GO:0000145,GO:0030426,GO:0005770,GO:0048471,GO:0017160,GO:0007032,GO:0001927,GO:0051601,GO:0022617,GO:0015031	cytosol|exocyst|growth cone|late endosome|perinuclear region of cytoplasm|Ral GTPase binding|endosome organization|exocyst assembly|exocyst localization|extracellular matrix disassembly|protein transport
EXPH5	0	1	1	1	Exophilin-5, partial [Bos mutus]	GO:0005768,GO:0017137,GO:0006886,GO:0003334,GO:0071985,GO:0045921,GO:0050714	endosome|Rab GTPase binding|intracellular protein transport|keratinocyte development|multivesicular body sorting pathway|positive regulation of exocytosis|positive regulation of protein secretion
EYA2	1	1	0	1	Eyes absent-like protein 2, partial [Bos mutus]	GO:0005829,GO:0005739,GO:0005634,GO:0000287,GO:0004725,GO:0048856,GO:0006281,GO:0097192,GO:0016576,GO:0097345,GO:0007275,GO:2001240,GO:0045739,GO:0014706	cytosol|mitochondrion|nucleus|magnesium ion binding|protein tyrosine phosphatase activity|anatomical structure development|DNA repair|extrinsic apoptotic signaling pathway in absence of ligand|histone dephosphorylation|mitochondrial outer membrane permeabilization|multicellular organism development|negative regulation of extrinsic apoptotic signaling pathway in absence of ligand|positive regulati…
F13A1	0	1	0	0	PREDICTED: coagulation factor XIII A chain [Bos mutus]			bom04610,bom05171	Complement and coagulation cascades|Coronavirus disease - COVID-19
F3	1	1	1	1	F3, partial [Cervus elaphus hippelaphus]	GO:0009986,GO:0062023,GO:0031012,GO:0005615,GO:0016021,GO:0005886,GO:1905286,GO:0005543,GO:0002020,GO:0004252,GO:0006919,GO:0002541,GO:0007596,GO:0019221,GO:0045766,GO:0001938,GO:0010641,GO:0051897	cell surface|collagen-containing extracellular matrix|extracellular matrix|extracellular space|integral component of membrane|plasma membrane|serine-type peptidase complex|phospholipid binding|protease binding|serine-type endopeptidase activity|activation of cysteine-type endopeptidase activity involved in apoptotic process|activation of plasma proteins involved in acute inflammatory response|blo…	bom04610,bom04933	Complement and coagulation cascades|AGE-RAGE signaling pathway in diabetic complications
FA2H	1	1	0	1	PREDICTED: fatty acid 2-hydroxylase, partial [Bos mutus]	GO:0005783,GO:0005789,GO:0016021,GO:0031090,GO:0080132,GO:0020037,GO:0005506,GO:0032286,GO:0006633,GO:0006631,GO:0030258,GO:0032287,GO:0042127,GO:0042634,GO:0001949,GO:0030148	endoplasmic reticulum|endoplasmic reticulum membrane|integral component of membrane|organelle membrane|fatty acid alpha-hydroxylase activity|heme binding|iron ion binding|central nervous system myelin maintenance|fatty acid biosynthetic process|fatty acid metabolic process|lipid modification|peripheral nervous system myelin maintenance|regulation of cell proliferation|regulation of hair cycle|seb…
FAAP100	0	1	0	0	PREDICTED: Fanconi anemia core complex-associated protein 100 [Bos mutus]	GO:0005829,GO:0043240,GO:0045111,GO:0005654,GO:0003677,GO:0036297	cytosol|Fanconi anaemia nuclear complex|intermediate filament cytoskeleton|nucleoplasm|DNA binding|interstrand cross-link repair	bom03460	Fanconi anemia pathway
FABP5	1	1	0	0	hypothetical protein DBR06_SOUSAS10510127, partial [Sousa chinensis]	GO:0030054,GO:0005737,GO:0005615,GO:0005634,GO:0014069,GO:0045211,GO:0045202,GO:0008289,GO:0099178	cell junction|cytoplasm|extracellular space|nucleus|postsynaptic density|postsynaptic membrane|synapse|lipid binding|regulation of retrograde trans-synaptic signaling by endocanabinoid	bom03320	PPAR signaling pathway
FADS2	1	1	0	0	Fatty acid desaturase 2, partial [Bos mutus]	GO:0005789,GO:0016021,GO:0004768,GO:0006636	endoplasmic reticulum membrane|integral component of membrane|stearoyl-CoA 9-desaturase activity|unsaturated fatty acid biosynthetic process	bom00592,bom01040,bom03320	alpha-Linolenic acid metabolism|Biosynthesis of unsaturated fatty acids|PPAR signaling pathway
FAIM	1	1	0	1	PREDICTED: fas apoptotic inhibitory molecule 1 isoform X1 [Capra hircus]	GO:0005737,GO:0006915,GO:0043066	cytoplasm|apoptotic process|negative regulation of apoptotic process
FAM109B	1	1	0	0	PREDICTED: sesquipedalian-2 isoform X1 [Bos mutus]	GO:0030136,GO:0005829,GO:0005769,GO:0055037,GO:0005802,GO:0042803,GO:0007032,GO:0001881,GO:0042147	clathrin-coated vesicle|cytosol|early endosome|recycling endosome|trans-Golgi network|protein homodimerization activity|endosome organization|receptor recycling|retrograde transport, endosome to Golgi
FAM110D	0	1	0	0	PREDICTED: protein FAM110D [Bos mutus]
FAM117B	1	0	0	0	PREDICTED: protein FAM117B [Bos mutus]
FAM122B	0	1	0	0	PREDICTED: protein FAM122B isoform X1 [Capra hircus]
FAM126B	1	1	0	0	PREDICTED: protein FAM126B isoform X1 [Bison bison bison]	GO:0005829,GO:0005886	cytosol|plasma membrane
FAM129A	0	0	0	1	PREDICTED: protein Niban [Bos mutus]
FAM131C	1	1	0	0	PREDICTED: protein FAM131C [Bos mutus]
FAM132A	1	1	1	1	Protein FAM132A, partial [Bos mutus]	GO:0005576,GO:0005615,GO:0005179,GO:0045721,GO:0050728,GO:0046326,GO:0046628,GO:0035774,GO:0051897,GO:0046324,GO:0010906	extracellular region|extracellular space|hormone activity|negative regulation of gluconeogenesis|negative regulation of inflammatory response|positive regulation of glucose import|positive regulation of insulin receptor signaling pathway|positive regulation of insulin secretion involved in cellular response to glucose stimulus|positive regulation of protein kinase B signaling|regulation of glucos…
FAM135A	1	1	1	1	PREDICTED: protein FAM135A isoform X1 [Bison bison bison]	GO:0044255	cellular lipid metabolic process
FAM149A	1	0	0	0	Protein FAM149A, partial [Bos mutus]
FAM151B	1	1	0	0	PREDICTED: protein FAM151B [Bos mutus]
FAM155A	1	1	0	0	PREDICTED: transmembrane protein FAM155A [Bos mutus]	GO:0016021,GO:0005886,GO:0098703	integral component of membrane|plasma membrane|calcium ion import across plasma membrane
FAM160A1	0	1	0	0	PREDICTED: LOW QUALITY PROTEIN: protein FAM160A1, partial [Bos mutus]
FAM167A	0	1	0	1	PREDICTED: protein FAM167A [Bos mutus]
FAM167B	1	0	0	0	PREDICTED: protein FAM167B isoform X1 [Chinchilla lanigera]
FAM169A	1	1	0	1	Protein FAM169A, partial [Bos mutus]	GO:0005637	nuclear inner membrane
FAM171A1	1	0	0	0	PREDICTED: protein FAM171A1 [Bos mutus]	GO:0016021	integral component of membrane
FAM189A1	0	1	0	0	PREDICTED: protein FAM189A1 [Bos mutus]	GO:0016021	integral component of membrane
FAM195A	1	1	1	1	PREDICTED: protein FAM195A [Bos mutus]	GO:0005737,GO:0010494,GO:0005634	cytoplasm|cytoplasmic stress granule|nucleus
FAM19A5	1	1	0	0	PREDICTED: protein FAM19A5 [Bos mutus]
FAM213A	1	1	0	0	redox-regulatory protein FAM213A isoform X1 [Bos taurus]	GO:0005737,GO:0005576,GO:0016209,GO:0055114,GO:0045670	cytoplasm|extracellular region|antioxidant activity|oxidation-reduction process|regulation of osteoclast differentiation
FAM214A	0	1	0	0	PREDICTED: protein FAM214A [Bos mutus]
FAM3B	0	1	1	0	protein FAM3B isoform X1 [Bos taurus]	GO:0005576,GO:0005615,GO:0005641,GO:0005125,GO:0006915,GO:0042593,GO:0030073	extracellular region|extracellular space|nuclear envelope lumen|cytokine activity|apoptotic process|glucose homeostasis|insulin secretion
FAM3D	0	1	0	0	PREDICTED: protein FAM3D [Bos mutus]	GO:0005576,GO:0005125,GO:0070093,GO:0046676	extracellular region|cytokine activity|negative regulation of glucagon secretion|negative regulation of insulin secretion
FAM43A	1	0	0	0	protein FAM43A [Acinonyx jubatus]
FAM46B	1	1	0	0	PREDICTED: protein FAM46B [Bos mutus]	GO:1990817	RNA adenylyltransferase activity
FAM46C	1	1	0	1	hypothetical protein [Bos mutus]	GO:0005737,GO:0005634,GO:1990817,GO:0003723,GO:0048255	cytoplasm|nucleus|RNA adenylyltransferase activity|RNA binding|mRNA stabilization
FAM64A	0	0	1	1	PREDICTED: protein FAM64A [Bos mutus]	GO:0005730,GO:0005634,GO:0007049,GO:0051301	nucleolus|nucleus|cell cycle|cell division
FAM65A	1	1	0	0	PREDICTED: protein FAM65A isoform X1 [Bos mutus]	GO:0031252,GO:0005737,GO:0070062,GO:0005794,GO:0016020,GO:0012506,GO:0071889,GO:1990869,GO:0009267,GO:0051683,GO:2001107,GO:0035024,GO:0030335,GO:0090316,GO:0034067,GO:0009611,GO:0007266	cell leading edge|cytoplasm|extracellular exosome|Golgi apparatus|membrane|vesicle membrane|14-3-3 protein binding|cellular response to chemokine|cellular response to starvation|establishment of Golgi localization|negative regulation of Rho guanyl-nucleotide exchange factor activity|negative regulation of Rho protein signal transduction|positive regulation of cell migration|positive regulation of…
FAM65B	0	0	0	1	PREDICTED: protein FAM65B [Bos mutus]	GO:0016324,GO:0005737,GO:0005856,GO:0030175,GO:0032420,GO:0060171,GO:0071889,GO:0007155,GO:1990869,GO:0006935,GO:0007162,GO:1903904,GO:1905872,GO:2001107,GO:0035024,GO:2000405,GO:0051491,GO:0045663,GO:1901741,GO:0090023,GO:2000391,GO:2000114,GO:0007605,GO:0048741	apical plasma membrane|cytoplasm|cytoskeleton|filopodium|stereocilium|stereocilium membrane|14-3-3 protein binding|cell adhesion|cellular response to chemokine|chemotaxis|negative regulation of cell adhesion|negative regulation of establishment of T cell polarity|negative regulation of protein localization to cell leading edge|negative regulation of Rho guanyl-nucleotide exchange factor activity|…
FAM72A	0	0	1	0	protein FAM72A [Bos taurus]	GO:0005829,GO:0016020,GO:0005739	cytosol|membrane|mitochondrion
FAM78A	0	1	0	0	Protein FAM78A, partial [Bos mutus]
FAM81A	1	1	0	0	PREDICTED: protein FAM81A [Bos mutus]
FAM83A	0	1	0	1	PREDICTED: protein FAM83A [Bos mutus]	GO:0005737,GO:0036312,GO:0019901,GO:0008283,GO:0007173	cytoplasm|phosphatidylinositol 3-kinase regulatory subunit binding|protein kinase binding|cell proliferation|epidermal growth factor receptor signaling pathway
[truncated: 2,297 more rows]
