# Supplementary material for: Transcriptome profiling in rumen, reticulum, omasum, and abomasum tissues during the developmental transition of pre-ruminant to the ruminant in yaks
Source: Frontiers journal article supplement (doi:10.3389/fvets.2023.1204706), 2023-09-22
Supplement: Data_Sheet_1.zip [file Table S5-The top 20 KEGG enrichment pathways of common DEmRNAs in rumen.xls]

id	Term	Classification_level1	Classification_level2	ListHits	p-value	Enrichment_score	geneID	hyperlink_only_excel
bom04514	Cell adhesion molecules	Environmental Information Processing	Signaling molecules and interaction	54	7.63753404582926e-09	2.16564563462949	ALCAM;CD2;CD22;CD276;CD34;CD4;CD40LG;CD6;CDH2;CLDN11;CLDN17;CLDN5;CNTN2;CTLA4;ICOS;ITGAL;ITGAM;ITGB2;ITGB8;JAM2;L1CAM;LOC102268170;LOC102269342;LOC102269592;LOC102271117;LOC102271676;LOC102271748;LOC102272326;LOC102275624;LOC102281193;LOC102282998;LOC102283463;LOC102284715;LOC102286791;LRRC4B;LRRC4C;MPZ;MPZL1;NCAM1;NCAM2;NEGR1;NLGN1;NRCAM;NTNG1;OCLN;PDCD1;PDCD1LG2;PTPRC;SDC2;SELL;SELPLG;SIGLEC1;S…	=HYPERLINK("../../3.KEGG_map/VennData/bom04514.html","bom04514")
bom00280	Valine, leucine and isoleucine degradation	Metabolism	Amino acid metabolism	25	5.7043992457697e-08	3.02675839920265	AACS;ACAA2;ACADS;ACADSB;ACAT1;ACAT2;ACSF3;ALDH6A1;BCKDHA;BCKDHB;DLD;ECHS1;HADH;HADHB;HIBCH;HMGCL;HMGCS1;HMGCS2;IVD;MCCC1;MCCC2;MCEE;MUT;PCCA;PCCB	=HYPERLINK("../../3.KEGG_map/VennData/bom00280.html","bom00280")
bom00982	Drug metabolism - cytochrome P450	Metabolism	Xenobiotics biodegradation and metabolism	25	4.9842022492898e-07	2.76583095099552	ADH5;FMO2;FMO3;FMO4;FMO5;GSTK1;GSTM3;LOC102264665;LOC102264698;LOC102269158;LOC102270291;LOC102270864;LOC102271929;LOC102272205;LOC102276661;LOC102276933;LOC102281969;LOC102282379;LOC102282831;LOC102283655;LOC102284246;LOC102287938;MAOA;MGST3;UGT2A1	=HYPERLINK("../../3.KEGG_map/VennData/bom00982.html","bom00982")
bom00020	Citrate cycle (TCA cycle)	Metabolism	Carbohydrate metabolism	17	9.3276543539901e-07	3.40888664710198	ACO1;CS;DLAT;DLD;DLST;IDH1;IDH3A;IDH3B;MDH2;OGDHL;PC;PCK2;PDHA1;SDHA;SDHC;SDHD;SUCLG2	=HYPERLINK("../../3.KEGG_map/VennData/bom00020.html","bom00020")
bom00480	Glutathione metabolism	Metabolism	Metabolism of other amino acids	25	1.56220887838728e-06	2.62980647799574	GCLM;GGT5;GPX1;GPX3;GPX4;GPX7;GPX8;GSR;GSS;GSTK1;GSTM3;IDH1;LOC102264698;LOC102271929;LOC102272205;LOC102276661;LOC102276933;LOC102281969;LOC102283655;LOC102287938;MGST3;ODC1;PRDX6;RRM2;SRM	=HYPERLINK("../../3.KEGG_map/VennData/bom00480.html","bom00480")
bom00640	Propanoate metabolism	Metabolism	Carbohydrate metabolism	17	1.64570534405277e-06	3.30558705173525	ACADS;ACAT1;ACAT2;ACSS2;ALDH6A1;BCKDHA;BCKDHB;DLD;ECHDC1;ECHS1;HIBCH;LOC102274962;MCEE;MUT;PCCA;PCCB;SUCLG2	=HYPERLINK("../../3.KEGG_map/VennData/bom00640.html","bom00640")
bom00983	Drug metabolism - other enzymes	Metabolism	Xenobiotics biodegradation and metabolism	27	3.39855405605151e-06	2.44016409535718	CDA;CES2;CMPK1;GSTM3;GUSB;LOC102264665;LOC102264698;LOC102269158;LOC102270291;LOC102270864;LOC102271929;LOC102272205;LOC102275700;LOC102275834;LOC102276661;LOC102276933;LOC102281969;LOC102282379;LOC102282831;LOC102283655;LOC102287938;MGST3;RRM2;TPMT;UCK2;UGT2A1;UPP1	=HYPERLINK("../../3.KEGG_map/VennData/bom00983.html","bom00983")
bom04640	Hematopoietic cell lineage	Organismal Systems	Immune system	34	4.84907565906294e-06	2.16008658826264	CD14;CD1E;CD2;CD22;CD34;CD3D;CD3E;CD3G;CD4;CD44;CD5;CD59;CD9;CR2;CSF1R;EPOR;FCER2;FLT3;IL11RA;IL1A;IL1R2;IL6R;IL7;ITGA5;ITGAM;LOC102269342;LOC102271117;LOC102271676;LOC102279846;LOC102282998;LOC102283463;LOC102288394;TFRC;TNF	=HYPERLINK("../../3.KEGG_map/VennData/bom04640.html","bom04640")
bom04512	ECM-receptor interaction	Environmental Information Processing	Signaling molecules and interaction	31	5.68498478214994e-06	2.23504002242245	CD44;COL1A1;COL1A2;COL2A1;COL4A1;COL4A2;COL4A5;COL4A6;COL6A1;COL6A2;COL6A6;COL9A1;COL9A3;FRAS1;FREM2;ITGA10;ITGA5;ITGA7;ITGB8;LAMA2;LAMA3;LAMA4;LOC102268113;LOC102268494;LOC102277745;NPNT;SPP1;SV2C;THBS3;THBS4;TNXB	=HYPERLINK("../../3.KEGG_map/VennData/bom04512.html","bom04512")
bom00100	Steroid biosynthesis	Metabolism	Lipid metabolism	12	7.26600370813521e-06	3.85003668378577	DHCR24;DHCR7;EBP;FDFT1;LIPA;LOC102272075;LSS;MSMO1;NSDHL;SOAT1;SQLE;TM7SF2	=HYPERLINK("../../3.KEGG_map/VennData/bom00100.html","bom00100")
bom00980	Metabolism of xenobiotics by cytochrome P450	Metabolism	Xenobiotics biodegradation and metabolism	24	8.25292707099334e-06	2.48389463470049	ADH5;GSTK1;GSTM3;LOC102264665;LOC102264698;LOC102265481;LOC102267279;LOC102269158;LOC102270291;LOC102270864;LOC102271929;LOC102272205;LOC102276661;LOC102276933;LOC102279872;LOC102281969;LOC102282379;LOC102282831;LOC102283235;LOC102283655;LOC102284246;LOC102287938;MGST3;UGT2A1	=HYPERLINK("../../3.KEGG_map/VennData/bom00980.html","bom00980")
bom05204	Chemical carcinogenesis - DNA adducts	Human Diseases	Cancer: overview	23	1.53294905701914e-05	2.45974565908535	GSTK1;GSTM3;LOC102264665;LOC102264698;LOC102269158;LOC102270291;LOC102270864;LOC102271929;LOC102272205;LOC102275700;LOC102276661;LOC102276933;LOC102280731;LOC102281969;LOC102282379;LOC102282831;LOC102283235;LOC102283655;LOC102284686;LOC102287938;MGST3;PTGS2;UGT2A1	=HYPERLINK("../../3.KEGG_map/VennData/bom05204.html","bom05204")
bom04061	Viral protein interaction with cytokine and cytokine receptor	Environmental Information Processing	Signaling molecules and interaction	29	1.78181579491789e-05	2.1892365456821	ACKR4;CCL22;CCL5;CCR4;CCR7;CSF1R;CX3CR1;CXCL10;CXCL8;CXCL9;CXCR1;CXCR2;CXCR4;IL10RA;IL18RAP;IL20RB;IL22RA1;IL2RG;IL6R;LOC102264498;LOC102269246;LOC102271445;LOC102284639;LOC102287450;LOC102288304;TNF;TNFRSF1A;TNFRSF1B;TNFSF10	=HYPERLINK("../../3.KEGG_map/VennData/bom04061.html","bom04061")
bom04060	Cytokine-cytokine receptor interaction	Environmental Information Processing	Signaling molecules and interaction	73	2.48688266668951e-05	1.58250381709663	ACKR4;BMP2;BMP3;BMP4;BMP5;CCL22;CCL5;CCR4;CCR7;CD27;CD4;CD40LG;CLCF1;CNTFR;CSF1R;CX3CR1;CXCL10;CXCL17;CXCL8;CXCL9;CXCR1;CXCR2;CXCR4;CXCR6;EDA2R;EDAR;EPOR;IFNLR1;IL10RA;IL11RA;IL12RB1;IL12RB2;IL17A;IL17B;IL17D;IL17F;IL18RAP;IL1A;IL1R2;IL1RL2;IL1RN;IL20RB;IL21R;IL22;IL22RA1;IL27RA;IL2RG;IL32;IL36B;IL36G;IL36RN;IL6R;IL7;LOC102264498;LOC102269246;LOC102271445;LOC102279846;LOC102284639;LOC102287450;LO…	=HYPERLINK("../../3.KEGG_map/VennData/bom04060.html","bom04060")
bom00140	Steroid hormone biosynthesis	Metabolism	Lipid metabolism	25	3.64405046653391e-05	2.25941119940479	HSD11B2;HSD17B12;HSD17B2;LOC102264665;LOC102267155;LOC102269158;LOC102269337;LOC102270291;LOC102270864;LOC102271037;LOC102271453;LOC102272308;LOC102272594;LOC102278627;LOC102280731;LOC102282116;LOC102282379;LOC102282831;LOC102283235;LOC102283454;LOC102284205;LOC102284686;SRD5A1;SULT2B1;UGT2A1	=HYPERLINK("../../3.KEGG_map/VennData/bom00140.html","bom00140")
bom05146	Amoebiasis	Human Diseases	Infectious disease: parasitic	32	5.65829185641732e-05	1.99354650293114	ARG1;CASP3;CD14;CD1E;COL1A1;COL1A2;COL3A1;COL4A1;COL4A2;COL4A5;COL4A6;CXCL8;GNA15;IL1R2;ITGAM;ITGB2;LAMA2;LAMA3;LAMA4;LOC102267172;LOC102269246;LOC102286123;LOC102288394;PIK3CA;PIK3CB;PIK3CD;PLCB2;PRKCB;SERPINB10;TGFB3;TLR4;TNF	=HYPERLINK("../../3.KEGG_map/VennData/bom05146.html","bom05146")
bom00830	Retinol metabolism	Metabolism	Metabolism of cofactors and vitamins	24	6.50995184854644e-05	2.23190532393378	ADH5;ALDH1A1;ALDH1A2;ALDH1A3;DHRS9;LOC102264665;LOC102265968;LOC102266920;LOC102269158;LOC102270291;LOC102270864;LOC102272258;LOC102274061;LOC102280731;LOC102282379;LOC102282831;LOC102283235;LOC102284246;LOC102284686;LRAT;RDH11;RETSAT;SDR16C5;UGT2A1	=HYPERLINK("../../3.KEGG_map/VennData/bom00830.html","bom00830")
bom00040	Pentose and glucuronate interconversions	Metabolism	Carbohydrate metabolism	13	7.07135164657435e-05	3.08953561044537	AKR1A1;CRYL1;GUSB;LOC102264665;LOC102269158;LOC102270291;LOC102270864;LOC102275834;LOC102282379;LOC102282831;SORD;UGDH;UGT2A1	=HYPERLINK("../../3.KEGG_map/VennData/bom00040.html","bom00040")
bom00601	Glycosphingolipid biosynthesis - lacto and neolacto series	Metabolism	Glycan biosynthesis and metabolism	14	8.99887495191421e-05	2.89787707381724	ABO;B3GALNT1;B3GNT3;B4GALT1;B4GALT2;FUT1;FUT2;FUT4;FUT6;LOC102276507;LOC102277917;ST3GAL3;ST3GAL4;ST3GAL6	=HYPERLINK("../../3.KEGG_map/VennData/bom00601.html","bom00601")
bom00630	Glyoxylate and dicarboxylate metabolism	Metabolism	Carbohydrate metabolism	14	0.000137215851993893	2.80731841526045	ACAT1;ACAT2;ACO1;ACSS2;AMT;CS;DLD;GLYCTK;MCEE;MDH2;MUT;PCCA;PCCB;SHMT1	=HYPERLINK("../../3.KEGG_map/VennData/bom00630.html","bom00630")
