# Supplementary material for: Transcriptome profiling in rumen, reticulum, omasum, and abomasum tissues during the developmental transition of pre-ruminant to the ruminant in yaks
Source: Frontiers journal article supplement (doi:10.3389/fvets.2023.1204706), 2023-09-22
Supplement: Data_Sheet_1.zip [file Table S6-The KEGG enrichment pathways in seven comparison groups in rumen.xlsx]

## Sheet: Table S6
id	Term	Classification_level1	Classification_level2	ListHits	p-value	Enrichment_score	geneID	class	group
bom00100	Steroid biosynthesis	Metabolism	Lipid metabolism	10	3.16936e-11	18.0702	DHCR24;DHCR7;EBP;FDFT1;LIPA;LSS;MSMO1;NSDHL;SQLE;TM7SF2	Rumen	G20d_G0d_up
bom00140	Steroid hormone biosynthesis	Metabolism	Lipid metabolism	11	3.42817e-06	5.59923	HSD17B12;LOC102264665;LOC102267155;LOC102269337;LOC102270864;LOC102271453;LOC102272308;LOC102283454;LOC102284686;SULT2B1;UGT2A1	Rumen	G20d_G0d_up
bom00040	Pentose and glucuronate interconversions	Metabolism	Carbohydrate metabolism	7	6.29862e-06	9.36976	AKR1A1;LOC102264665;LOC102270864;LOC102275834;SORD;UGDH;UGT2A1	Rumen	G20d_G0d_up
bom04914	Progesterone-mediated oocyte maturation	Organismal Systems	Endocrine system	11	4.31311e-05	4.32115	AURKA;BUB1;CCNB1;CCNB2;CDC25B;CDC25C;CDK1;CPEB4;KIF22;PIK3CB;RPS6KA3	Rumen	G20d_G0d_up
bom04913	Ovarian steroidogenesis	Organismal Systems	Endocrine system	9	4.62256e-05	5.2462	LOC102267155;LOC102269337;LOC102271453;LOC102272308;LOC102283454;LOC102286944;PLA2G4D;PLA2G4E;PLA2G4F	Rumen	G20d_G0d_up
bom00053	Ascorbate and aldarate metabolism	Metabolism	Carbohydrate metabolism	6	4.80136e-05	8.67372	AKR1A1;LOC102264665;LOC102270864;LOC102275834;UGDH;UGT2A1	Rumen	G20d_G0d_up
bom04640	Hematopoietic cell lineage	Organismal Systems	Immune system	11	0.000102453	3.93609	CD1E;CD3D;CD3G;CD4;FCER2;FLT3;IL1A;IL1R2;LOC102269342;LOC102271117;LOC102283463	Rumen	G20d_G0d_up
bom00790	Folate biosynthesis	Metabolism	Metabolism of cofactors and vitamins	7	0.000114568	6.17033	ALPL;LOC102267155;LOC102269337;LOC102271453;LOC102272308;LOC102283454;MOCS1	Rumen	G20d_G0d_up
bom00650	Butanoate metabolism	Metabolism	Carbohydrate metabolism	6	0.000117363	7.47734	ACADS;ALDH5A1;BDH1;ECHS1;HMGCS1;HMGCS2	Rumen	G20d_G0d_up
bom04978	Mineral absorption	Organismal Systems	Digestive system	9	0.000122251	4.64664	ATOX1;LOC102276607;SLC26A3;SLC26A9;SLC30A1;SLC40A1;SLC5A1;SLC9A3;TRPM6	Rumen	G20d_G0d_up
bom00983	Drug metabolism - other enzymes	Metabolism	Xenobiotics biodegradation and metabolism	9	0.000136674	4.58119	CDA;CMPK1;LOC102264665;LOC102270864;LOC102275700;LOC102275834;LOC102283655;TPMT;UGT2A1	Rumen	G20d_G0d_up
bom00601	Glycosphingolipid biosynthesis - lacto and neolacto series	Metabolism	Glycan biosynthesis and metabolism	6	0.000173671	6.99493	ABO;B3GNT3;FUT1;FUT4;FUT6;LOC102277917	Rumen	G20d_G0d_up
bom00590	Arachidonic acid metabolism	Metabolism	Lipid metabolism	9	0.000588939	3.78214	LOC102267155;LOC102269337;LOC102271453;LOC102272308;LOC102279872;LOC102283454;PLA2G4D;PLA2G4E;PLA2G4F	Rumen	G20d_G0d_up
bom04110	Cell cycle	Cellular Processes	Cell growth and death	11	0.000762873	3.13028	BUB1;BUB1B;CCNB1;CCNB2;CDC20;CDC25B;CDC25C;CDK1;CDKN2C;PTTG1;TTK	Rumen	G20d_G0d_up
bom04114	Oocyte meiosis	Cellular Processes	Cell growth and death	11	0.000814627	3.10582	AURKA;BUB1;CCNB1;CCNB2;CDC20;CDC25C;CDK1;CPEB4;LOC102266295;PTTG1;RPS6KA3	Rumen	G20d_G0d_up
bom03320	PPAR signaling pathway	Organismal Systems	Endocrine system	8	0.0017251	3.56943	ACSL6;CPT2;GK;HMGCS1;HMGCS2;ME1;PPARG;SLC27A4	Rumen	G20d_G0d_up
bom00512	Mucin type O-glycan biosynthesis	Metabolism	Glycan biosynthesis and metabolism	5	0.00224646	5.31478	B3GNT3;GALNT12;GALNT6;GCNT3;ST6GALNAC2	Rumen	G20d_G0d_up
bom00280	Valine, leucine and isoleucine degradation	Metabolism	Amino acid metabolism	6	0.00326137	4.09138	ACADS;ECHS1;HMGCS1;HMGCS2;PCCA;PCCB	Rumen	G20d_G0d_up
bom00565	Ether lipid metabolism	Metabolism	Lipid metabolism	6	0.00358593	4.01561	GDPD3;PLA2G4D;PLA2G4E;PLA2G4F;PLD1;PLD4	Rumen	G20d_G0d_up
bom00860	Porphyrin and chlorophyll metabolism	Metabolism	Metabolism of cofactors and vitamins	5	0.00370476	4.75533	BLVRB;LOC102264665;LOC102270864;LOC102275834;UGT2A1	Rumen	G20d_G0d_up
bom04010	MAPK signaling pathway	Environmental Information Processing	Signal transduction	8	0.000191982	4.89013	DUSP1;FGFR1;IGF2;MAPK8IP3;MYC;NGFR;NR4A1;RELB	Rumen	G20d_G0d_down
bom04927	Cortisol synthesis and secretion	Organismal Systems	Endocrine system	3	0.00590428	8.11317	CREB3L1;LOC102282116;NR4A1	Rumen	G20d_G0d_down
bom05230	Central carbon metabolism in cancer	Human Diseases	Cancer: overview	3	0.00695342	7.64956	FGFR1;MYC;RET	Rumen	G20d_G0d_down
bom05166	Human T-cell leukemia virus 1 infection	Human Diseases	Infectious disease: viral	5	0.0106496	3.71854	CREB3L1;EGR1;ETS2;MYC;RELB	Rumen	G20d_G0d_down
bom03020	RNA polymerase	Genetic Information Processing	Transcription	2	0.0113371	12.3096	POLR1C;ZNRD1	Rumen	G20d_G0d_down
bom04350	TGF-beta signaling pathway	Environmental Information Processing	Signal transduction	3	0.0142191	5.88428	ID3;MYC;PITX2	Rumen	G20d_G0d_down
bom04151	PI3K-Akt signaling pathway	Environmental Information Processing	Signal transduction	6	0.0167645	2.88663	CREB3L1;FGFR1;IGF2;MYC;NGFR;NR4A1	Rumen	G20d_G0d_down
bom04925	Aldosterone synthesis and secretion	Organismal Systems	Endocrine system	3	0.0182757	5.35469	CREB3L1;LOC102282116;NR4A1	Rumen	G20d_G0d_down
bom04928	Parathyroid hormone synthesis, secretion and action	Organismal Systems	Endocrine system	3	0.0207802	5.09971	CREB3L1;EGR1;FGFR1	Rumen	G20d_G0d_down
bom05216	Thyroid cancer	Human Diseases	Cancer: specific types	2	0.0209471	8.92449	MYC;RET	Rumen	G20d_G0d_down
bom04935	Growth hormone synthesis, secretion and action	Organismal Systems	Endocrine system	3	0.0257424	4.6971	CREB3L1;SOCS3;SST	Rumen	G20d_G0d_down
bom05030	Cocaine addiction	Human Diseases	Substance dependence	2	0.0305933	7.2853	CREB3L1;GPSM1	Rumen	G20d_G0d_down
bom00982	Drug metabolism - cytochrome P450	Metabolism	Xenobiotics biodegradation and metabolism	2	0.0416611	6.15482	FMO3;LOC102287938	Rumen	G20d_G0d_down
bom04550	Signaling pathways regulating pluripotency of stem cells	Cellular Processes	Cellular community - eukaryotes	3	0.0441129	3.79766	FGFR1;ID3;MYC	Rumen	G20d_G0d_down
bom04014	Ras signaling pathway	Environmental Information Processing	Signal transduction	4	0.0512851	2.84446	ETS2;FGFR1;IGF2;NGFR	Rumen	G20d_G0d_down
bom04934	Cushing syndrome	Human Diseases	Endocrine and metabolic disease	3	0.0600764	3.34668	CREB3L1;LOC102282116;NR4A1	Rumen	G20d_G0d_down
bom04390	Hippo signaling pathway	Environmental Information Processing	Signal transduction	3	0.0609831	3.3259	MYC;NKD2;WTIP	Rumen	G20d_G0d_down
bom05223	Non-small cell lung cancer	Human Diseases	Cancer: specific types	2	0.0643634	4.82405	KIF5A;RET	Rumen	G20d_G0d_down
bom04310	Wnt signaling pathway	Environmental Information Processing	Signal transduction	3	0.068468	3.16846	MYC;NKD2;SFRP5	Rumen	G20d_G0d_down
bom05225	Hepatocellular carcinoma	Human Diseases	Cancer: specific types	3	0.0723619	3.0952	IGF2;LOC102287938;MYC	Rumen	G20d_G0d_down
bom00280	Valine, leucine and isoleucine degradation	Metabolism	Amino acid metabolism	17	1.6023e-11	7.79256	ACAA2;ACADS;ACADSB;ACSF3;ALDH6A1;BCKDHA;ECHS1;HADH;HADHB;HMGCL;HMGCS2;IVD;MCCC1;MCEE;MUT;PCCA;PCCB	Rumen	G60d_G0d_up
bom00980	Metabolism of xenobiotics by cytochrome P450	Metabolism	Xenobiotics biodegradation and metabolism	15	1.96517e-08	5.87769	ADH5;GSTK1;LOC102264665;LOC102264698;LOC102265481;LOC102267279;LOC102270864;LOC102276661;LOC102279872;LOC102282379;LOC102282831;LOC102283235;LOC102284246;MGST3;UGT2A1	Rumen	G60d_G0d_up
bom00140	Steroid hormone biosynthesis	Metabolism	Lipid metabolism	16	1.97032e-08	5.4748	HSD17B2;LOC102264665;LOC102267155;LOC102269337;LOC102270864;LOC102271037;LOC102271453;LOC102272308;LOC102272594;LOC102282379;LOC102282831;LOC102283235;LOC102283454;LOC102284205;LOC102284686;UGT2A1	Rumen	G60d_G0d_up
bom00983	Drug metabolism - other enzymes	Metabolism	Xenobiotics biodegradation and metabolism	15	1.37688e-07	5.13263	CDA;CES2;CMPK1;LOC102264665;LOC102264698;LOC102270864;LOC102275700;LOC102276661;LOC102282379;LOC102282831;MGST3;RRM2;TPMT;UGT2A1;UPP1	Rumen	G60d_G0d_up
bom04913	Ovarian steroidogenesis	Organismal Systems	Endocrine system	14	1.49871e-07	5.48584	HSD17B2;LOC102267155;LOC102269337;LOC102271037;LOC102271453;LOC102272308;LOC102272594;LOC102283235;LOC102283454;LOC102284205;LOC102286372;LOC102286944;PLA2G4D;PLA2G4F	Rumen	G60d_G0d_up
bom00982	Drug metabolism - cytochrome P450	Metabolism	Xenobiotics biodegradation and metabolism	13	4.60438e-07	5.44531	ADH5;FMO4;FMO5;GSTK1;LOC102264665;LOC102264698;LOC102270864;LOC102276661;LOC102282379;LOC102282831;LOC102284246;MGST3;UGT2A1	Rumen	G60d_G0d_up
bom00640	Propanoate metabolism	Metabolism	Carbohydrate metabolism	10	4.88822e-07	7.36195	ACADS;ACSS2;ALDH6A1;BCKDHA;ECHS1;MCEE;MUT;PCCA;PCCB;SUCLG2	Rumen	G60d_G0d_up
bom00830	Retinol metabolism	Metabolism	Metabolism of cofactors and vitamins	14	6.12787e-07	4.92931	ADH5;ALDH1A1;DHRS9;LOC102264665;LOC102266920;LOC102270864;LOC102282379;LOC102282831;LOC102283235;LOC102284246;LOC102284686;LRAT;RETSAT;UGT2A1	Rumen	G60d_G0d_up
bom00040	Pentose and glucuronate interconversions	Metabolism	Carbohydrate metabolism	9	7.45012e-07	8.09815	AKR1A1;CRYL1;LOC102264665;LOC102270864;LOC102282379;LOC102282831;SORD;UGDH;UGT2A1	Rumen	G60d_G0d_up
bom05204	Chemical carcinogenesis - DNA adducts	Human Diseases	Cancer: overview	12	4.61435e-06	4.85889	GSTK1;LOC102264665;LOC102264698;LOC102270864;LOC102275700;LOC102276661;LOC102282379;LOC102282831;LOC102283235;LOC102284686;MGST3;UGT2A1	Rumen	G60d_G0d_up
bom05164	Influenza A	Human Diseases	Infectious disease: viral	21	6.02623e-06	3.00108	CASP3;CCL5;CDK6;CIITA;DDX58;EIF2AK2;IL1A;LOC102269342;LOC102271676;LOC102282998;LOC102283231;LOC102283513;MX1;MX2;OAS2;PIK3CB;PRKCB;RSAD2;TMPRSS11D;TNFSF10;TRIM25	Rumen	G60d_G0d_up
bom00920	Sulfur metabolism	Metabolism	Energy metabolism	5	2.44131e-05	12.1472	ETHE1;PAPSS2;SELENBP1;SUOX;TST	Rumen	G60d_G0d_up
bom00790	Folate biosynthesis	Metabolism	Metabolism of cofactors and vitamins	9	3.33865e-05	5.33293	ALPL;LOC102267155;LOC102269337;LOC102271037;LOC102271453;LOC102272308;LOC102272594;LOC102283454;LOC102284205	Rumen	G60d_G0d_up
bom00053	Ascorbate and aldarate metabolism	Metabolism	Carbohydrate metabolism	7	4.77313e-05	6.80244	AKR1A1;LOC102264665;LOC102270864;LOC102282379;LOC102282831;UGDH;UGT2A1	Rumen	G60d_G0d_up
bom05169	Epstein-Barr virus infection	Human Diseases	Infectious disease: viral	22	0.000107951	2.41845	BLNK;CASP3;CCNA2;CD3D;CD3G;CDK6;CR2;DDX58;EIF2AK2;FCER2;ISG15;LOC102268170;LOC102269342;LOC102271676;LOC102272934;LOC102282998;LOC102283231;LOC102283513;OAS2;PIK3CB;PLCG2;RB1	Rumen	G60d_G0d_up
bom00650	Butanoate metabolism	Metabolism	Carbohydrate metabolism	7	0.000134401	5.86418	ACADS;ALDH5A1;BDH1;ECHS1;HADH;HMGCL;HMGCS2	Rumen	G60d_G0d_up
bom04146	Peroxisome	Cellular Processes	Transport and catabolism	12	0.000152918	3.47063	ABCD3;ACOX2;AMACR;CROT;DAO;ECH1;GSTK1;HMGCL;HSD17B4;IDH1;LOC102268462;PRDX5	Rumen	G60d_G0d_up
bom00480	Glutathione metabolism	Metabolism	Metabolism of other amino acids	10	0.000170137	3.9827	GCLM;GSR;GSS;GSTK1;IDH1;LOC102264698;LOC102276661;MGST3;PRDX6;RRM2	Rumen	G60d_G0d_up
bom00590	Arachidonic acid metabolism	Metabolism	Lipid metabolism	12	0.000192169	3.38992	LOC102267155;LOC102269337;LOC102271037;LOC102271453;LOC102272308;LOC102272594;LOC102279872;LOC102283454;LOC102284205;PLA2G4D;PLA2G4F;PTGS1	Rumen	G60d_G0d_up
bom00630	Glyoxylate and dicarboxylate metabolism	Metabolism	Carbohydrate metabolism	7	0.000260526	5.31441	ACSS2;GLYCTK;MCEE;MUT;PCCA;PCCB;SHMT1	Rumen	G60d_G0d_up
bom03008	Ribosome biogenesis in eukaryotes	Genetic Information Processing	Translation	12	1.23836e-08	8.52437	DKC1;FBL;GNL2;GNL3;NHP2;NOP56;NOP58;POP1;RPP38;RRP7A;TBL3;UTP18	Rumen	G60d_G0d_down
bom00330	Arginine and proline metabolism	Metabolism	Amino acid metabolism	5	0.00199858	5.53264	OAT;ODC1;P4HA3;PYCR1;SRM	Rumen	G60d_G0d_down
bom04010	MAPK signaling pathway	Environmental Information Processing	Signal transduction	12	0.0048272	2.36464	CACNA1G;DDIT3;DUSP1;FGFR1;FGFR4;IGF2;MYC;NGFR;NR4A1;RELB;RRAS2;TNFRSF1A	Rumen	G60d_G0d_down
bom04925	Aldosterone synthesis and secretion	Organismal Systems	Endocrine system	6	0.00779043	3.45237	ATP1B1;CACNA1G;CREB3L1;LOC102282116;NR4A1;NR4A2	Rumen	G60d_G0d_down
bom04977	Vitamin digestion and absorption	Organismal Systems	Digestive system	3	0.0089429	6.90474	SLC23A1;SLC52A3;SLC5A6	Rumen	G60d_G0d_down
bom00240	Pyrimidine metabolism	Metabolism	Nucleotide metabolism	4	0.0141513	4.26218	CAD;NT5C;NT5C3B;UCK2	Rumen	G60d_G0d_down
bom00480	Glutathione metabolism	Metabolism	Metabolism of other amino acids	4	0.0212829	3.77308	GPX1;GPX4;ODC1;SRM	Rumen	G60d_G0d_down
bom04960	Aldosterone-regulated sodium reabsorption	Organismal Systems	Excretory system	3	0.0259797	4.66536	ATP1B1;SCNN1B;SCNN1G	Rumen	G60d_G0d_down
bom04927	Cortisol synthesis and secretion	Organismal Systems	Endocrine system	4	0.0275155	3.48724	CACNA1G;CREB3L1;LOC102282116;NR4A1	Rumen	G60d_G0d_down
bom04060	Cytokine-cytokine receptor interaction	Environmental Information Processing	Signaling molecules and interaction	10	0.033398	1.9439	CLCF1;CNTFR;CXCR1;CXCR2;IL27RA;LOC102269246;NGFR;RELT;TNFRSF1A;TNFRSF6B	Rumen	G60d_G0d_down
bom03040	Spliceosome	Genetic Information Processing	Transcription	6	0.0382584	2.41424	ALYREF;FUS;PRPF3;SNRPD1;SRSF2;SRSF7	Rumen	G60d_G0d_down
bom04064	NF-kappa B signaling pathway	Environmental Information Processing	Signal transduction	5	0.0467625	2.54599	LOC102269246;LOC102281707;PTGS2;RELB;TNFRSF1A	Rumen	G60d_G0d_down
bom04668	TNF signaling pathway	Environmental Information Processing	Signal transduction	5	0.0467625	2.54599	CREB3L1;LOC102269246;PTGS2;SOCS3;TNFRSF1A	Rumen	G60d_G0d_down
bom05030	Cocaine addiction	Human Diseases	Substance dependence	3	0.0530592	3.52282	CREB3L1;FOSB;GPSM1	Rumen	G60d_G0d_down
bom04964	Proximal tubule bicarbonate reclamation	Organismal Systems	Excretory system	2	0.0552429	5.23086	ATP1B1;LOC102266781	Rumen	G60d_G0d_down
bom03060	Protein export	Genetic Information Processing	Folding, sorting and degradation	2	0.0598315	5.00343	SEC61A2;SPCS3	Rumen	G60d_G0d_down
bom04061	Viral protein interaction with cytokine and cytokine receptor	Environmental Information Processing	Signaling molecules and interaction	4	0.0602671	2.70774	CXCR1;CXCR2;LOC102269246;TNFRSF1A	Rumen	G60d_G0d_down
bom04657	IL-17 signaling pathway	Organismal Systems	Immune system	4	0.0645514	2.64549	FOSB;LOC102269246;LOC102271402;PTGS2	Rumen	G60d_G0d_down
bom05014	Amyotrophic lateral sclerosis	Human Diseases	Neurodegenerative disease	11	0.065681	1.67001	ALYREF;DDIT3;FUS;GPX1;KLC2;NEFL;NEFM;PRPH;SRSF7;TNFRSF1A;TUBB6	Rumen	G60d_G0d_down
bom04350	TGF-beta signaling pathway	Environmental Information Processing	Signal transduction	4	0.0735852	2.52921	CHRD;E2F4;MYC;PITX2	Rumen	G60d_G0d_down
bom00280	Valine, leucine and isoleucine degradation	Metabolism	Amino acid metabolism	23	1.99727e-12	5.49267	ACAA2;ACADS;ACADSB;ACAT1;ACAT2;ACSF3;ALDH6A1;BCKDHA;BCKDHB;DLD;ECHS1;HADH;HADHB;HIBCH;HMGCL;HMGCS2;IVD;MCCC1;MCCC2;MCEE;MUT;PCCA;PCCB	Rumen	G15m_G0d_up
bom00640	Propanoate metabolism	Metabolism	Carbohydrate metabolism	17	5.27708e-11	6.52028	ACADS;ACAT1;ACAT2;ACSS2;ALDH6A1;BCKDHA;BCKDHB;DLD;ECHDC1;ECHS1;HIBCH;LOC102274962;MCEE;MUT;PCCA;PCCB;SUCLG2	Rumen	G15m_G0d_up
bom00100	Steroid biosynthesis	Metabolism	Lipid metabolism	12	3.76246e-09	7.59421	DHCR24;DHCR7;EBP;FDFT1;LIPA;LOC102272075;LSS;MSMO1;NSDHL;SOAT1;SQLE;TM7SF2	Rumen	G15m_G0d_up
bom04146	Peroxisome	Cellular Processes	Transport and catabolism	24	1.60326e-08	3.61629	ABCD3;ACOT8;ACOX2;ACSL5;ACSL6;AMACR;CROT;DAO;ECH1;GSTK1;HMGCL;HSD17B4;IDH1;LOC102268462;LOC102281973;NUDT12;NUDT19;PECR;PEX1;PEX3;PMVK;PRDX5;PXMP4;SLC27A2	Rumen	G15m_G0d_up
bom04061	Viral protein interaction with cytokine and cytokine receptor	Environmental Information Processing	Signaling molecules and interaction	24	2.07048e-08	3.57375	ACKR4;CCL22;CCL5;CCR4;CCR7;CSF1R;CX3CR1;CXCL10;CXCL8;CXCL9;CXCR4;IL10RA;IL18RAP;IL20RB;IL22RA1;IL2RG;IL6R;LOC102264498;LOC102284639;LOC102287450;LOC102288304;TNF;TNFRSF1B;TNFSF10	Rumen	G15m_G0d_up
bom04060	Cytokine-cytokine receptor interaction	Environmental Information Processing	Signaling molecules and interaction	52	2.58969e-08	2.22353	ACKR4;BMP2;CCL22;CCL5;CCR4;CCR7;CD27;CD4;CD40LG;CSF1R;CX3CR1;CXCL10;CXCL17;CXCL8;CXCL9;CXCR4;CXCR6;EDA2R;EPOR;IFNLR1;IL10RA;IL12RB1;IL12RB2;IL17A;IL17F;IL18RAP;IL1A;IL1R2;IL1RL2;IL1RN;IL20RB;IL21R;IL22;IL22RA1;IL2RG;IL32;IL36B;IL36G;IL36RN;IL6R;IL7;LOC102264498;LOC102284639;LOC102287450;LOC102288248;LOC102288304;PRLR;TNF;TNFRSF1B;TNFSF10;TNFSF13;TNFSF13B	Rumen	G15m_G0d_up
bom04640	Hematopoietic cell lineage	Organismal Systems	Immune system	25	1.8175e-07	3.13293	CD14;CD1E;CD2;CD22;CD3D;CD3E;CD3G;CD4;CD5;CD9;CR2;CSF1R;EPOR;FCER2;IL1A;IL1R2;IL6R;IL7;ITGAM;LOC102269342;LOC102271117;LOC102271676;LOC102282998;LOC102283463;TNF	Rumen	G15m_G0d_up
bom00040	Pentose and glucuronate interconversions	Metabolism	Carbohydrate metabolism	12	3.08992e-07	5.62534	AKR1A1;CRYL1;GUSB;LOC102264665;LOC102269158;LOC102270291;LOC102270864;LOC102275834;LOC102282831;SORD;UGDH;UGT2A1	Rumen	G15m_G0d_up
bom00983	Drug metabolism - other enzymes	Metabolism	Xenobiotics biodegradation and metabolism	20	3.27122e-07	3.56536	CDA;CES2;CMPK1;GSTM3;GUSB;LOC102264665;LOC102264698;LOC102269158;LOC102270291;LOC102270864;LOC102272205;LOC102275700;LOC102275834;LOC102281969;LOC102282831;MGST3;RRM2;TPMT;UGT2A1;UPP1	Rumen	G15m_G0d_up
bom04142	Lysosome	Cellular Processes	Transport and catabolism	29	5.09559e-07	2.71892	ACP5;AP4B1;ATP6V0A1;ATP6V0B;CD68;CTNS;CTSA;CTSD;CTSH;CTSS;CTSZ;GBA;GNS;GUSB;HEXB;IDS;LAMP3;LAPTM5;LIPA;LOC102275834;MAN2B1;MANBA;MCOLN1;NAPSA;NPC1;NPC2;PPT2;SORT1;TPP1	Rumen	G15m_G0d_up
bom00982	Drug metabolism - cytochrome P450	Metabolism	Xenobiotics biodegradation and metabolism	17	1.35809e-06	3.70982	ADH5;FMO4;FMO5;GSTK1;GSTM3;LOC102264665;LOC102264698;LOC102269158;LOC102270291;LOC102270864;LOC102272205;LOC102281969;LOC102282831;LOC102284246;MAOA;MGST3;UGT2A1	Rumen	G15m_G0d_up
bom00630	Glyoxylate and dicarboxylate metabolism	Metabolism	Carbohydrate metabolism	12	2.77288e-06	4.74638	ACAT1;ACAT2;ACO1;ACSS2;CS;DLD;GLYCTK;MCEE;MUT;PCCA;PCCB;SHMT1	Rumen	G15m_G0d_up
bom00980	Metabolism of xenobiotics by cytochrome P450	Metabolism	Xenobiotics biodegradation and metabolism	17	3.76519e-06	3.47047	ADH5;GSTK1;GSTM3;LOC102264665;LOC102264698;LOC102265481;LOC102267279;LOC102269158;LOC102270291;LOC102270864;LOC102272205;LOC102279872;LOC102281969;LOC102282831;LOC102284246;MGST3;UGT2A1	Rumen	G15m_G0d_up
bom05321	Inflammatory bowel disease	Human Diseases	Immune disease	19	4.61694e-06	3.16425	IL12RB1;IL12RB2;IL17A;IL17F;IL18RAP;IL1A;IL21R;IL22;IL2RG;LOC102269342;LOC102271117;LOC102271676;LOC102282998;LOC102283463;NOD2;TBX21;TLR4;TLR5;TNF	Rumen	G15m_G0d_up
bom00620	Pyruvate metabolism	Metabolism	Carbohydrate metabolism	14	5.3672e-06	3.93774	ACAT1;ACAT2;ACSS2;ADH5;AKR1A1;DLAT;DLD;LDHD;LOC102274962;LOC102284246;ME1;ME2;PCK2;PDHA1	Rumen	G15m_G0d_up
bom00140	Steroid hormone biosynthesis	Metabolism	Lipid metabolism	18	6.63393e-06	3.20882	HSD11B2;HSD17B12;HSD17B2;LOC102264665;LOC102267155;LOC102269158;LOC102269337;LOC102270291;LOC102270864;LOC102271453;LOC102272308;LOC102272594;LOC102282831;LOC102283454;LOC102284205;LOC102284686;SRD5A1;UGT2A1	Rumen	G15m_G0d_up
bom00053	Ascorbate and aldarate metabolism	Metabolism	Carbohydrate metabolism	10	9.72792e-06	5.06281	AKR1A1;GUSB;LOC102264665;LOC102269158;LOC102270291;LOC102270864;LOC102275834;LOC102282831;UGDH;UGT2A1	Rumen	G15m_G0d_up
bom05150	Staphylococcus aureus infection	Human Diseases	Infectious disease: bacterial	22	1.56223e-05	2.67745	C1QA;C1QB;C1QC;C2;C3AR1;ITGAL;ITGAM;ITGB2;KRT23;KRT35;LOC102268264;LOC102268548;LOC102269342;LOC102271117;LOC102271676;LOC102273069;LOC102273538;LOC102274112;LOC102281124;LOC102282998;LOC102283463;SELPLG	Rumen	G15m_G0d_up
bom05340	Primary immunodeficiency	Human Diseases	Immune disease	12	1.57317e-05	4.10498	BLNK;CD3D;CD3E;CD4;CD40LG;CD79A;CIITA;ICOS;IL2RG;LOC102280800;PTPRC;TAP1	Rumen	G15m_G0d_up
bom00020	Citrate cycle (TCA cycle)	Metabolism	Carbohydrate metabolism	11	1.91029e-05	4.35085	ACO1;CS;DLAT;DLD;IDH1;IDH3B;PCK2;PDHA1;SDHA;SDHC;SUCLG2	Rumen	G15m_G0d_up
bom04974	Protein digestion and absorption	Organismal Systems	Digestive system	31	2.6722e-12	4.28725	ACE2;ATP1A1;ATP1A3;ATP1B1;COL11A1;COL13A1;COL14A1;COL16A1;COL17A1;COL1A1;COL1A2;COL21A1;COL2A1;COL3A1;COL4A1;COL4A2;COL4A5;COL4A6;COL5A1;COL5A2;COL5A3;COL6A1;COL6A2;COL6A6;COL7A1;COL9A1;COL9A3;LOC102268113;LOC102284061;LOC102285924;SLC1A5	Rumen	G15m_G0d_down
bom04512	ECM-receptor interaction	Environmental Information Processing	Signaling molecules and interaction	24	1.86224e-11	5.07198	CD44;COL1A1;COL1A2;COL2A1;COL4A1;COL4A2;COL4A5;COL4A6;COL6A1;COL6A2;COL6A6;COL9A1;COL9A3;FRAS1;FREM2;ITGA10;ITGA5;ITGA7;LAMA4;LOC102268113;NPNT;SV2C;THBS3;TNXB	Rumen	G15m_G0d_down
bom04151	PI3K-Akt signaling pathway	Environmental Information Processing	Signal transduction	41	5.71829e-06	2.07858	ANGPT4;CCND3;COL1A1;COL1A2;COL2A1;COL4A1;COL4A2;COL4A5;COL4A6;COL6A1;COL6A2;COL6A6;COL9A1;COL9A3;CREB3L1;EFNA2;FGF1;FGF7;FGFR1;FGFR4;GNG10;GNG11;GNG2;GNG3;GNGT2;IGF2;ITGA10;ITGA5;ITGA7;LAMA4;LOC102268113;MYC;NGFR;NR4A1;NTF4;NTRK2;PKN3;PPP2R2B;THBS3;TNXB;YWHAQ	Rumen	G15m_G0d_down
bom04713	Circadian entrainment	Organismal Systems	Environmental adaptation	17	3.43883e-05	3.0452	ADCY3;ADCY5;ADCYAP1R1;CACNA1D;CACNA1G;CAMK2A;GNG10;GNG11;GNG2;GNG3;GNGT2;GRIA1;GRIA4;GUCY1A3;GUCY1B3;LOC102286123;PER1	Rumen	G15m_G0d_down
bom04514	Cell adhesion molecules	Environmental Information Processing	Signaling molecules and interaction	22	3.60846e-05	2.58618	ALCAM;CD276;CD34;CDH2;CLDN11;CLDN5;CNTN2;L1CAM;LOC102269592;LOC102284715;LRRC4B;LRRC4C;MPZ;MPZL1;NCAM1;NEGR1;NLGN1;NRCAM;NTNG1;PDCD1;SDC2;VTCN1	Rumen	G15m_G0d_down
bom04728	Dopaminergic synapse	Organismal Systems	Nervous system	20	3.79299e-05	2.72588	ADCY5;ARNTL;CACNA1B;CACNA1D;CALY;CAMK2A;CREB3L1;DDC;GNG10;GNG11;GNG2;GNG3;GNGT2;GRIA1;GRIA4;KIF5A;KIF5C;LOC102286123;PPP2R2B;TH	Rumen	G15m_G0d_down
bom04724	Glutamatergic synapse	Organismal Systems	Nervous system	17	8.95013e-05	2.82961	ADCY3;ADCY5;CACNA1D;DLG4;GNG10;GNG11;GNG2;GNG3;GNGT2;GRIA1;GRIA4;GRIK3;HOMER3;LOC102286123;SHANK2;SLC1A3;SLC38A3	Rumen	G15m_G0d_down
bom04926	Relaxin signaling pathway	Organismal Systems	Endocrine system	18	0.000184468	2.58439	ACTA2;ADCY3;ADCY5;COL1A1;COL1A2;COL3A1;COL4A1;COL4A2;COL4A5;COL4A6;CREB3L1;GNG10;GNG11;GNG2;GNG3;GNGT2;LOC102286123;SHC2	Rumen	G15m_G0d_down
bom04727	GABAergic synapse	Organismal Systems	Nervous system	14	0.000291326	2.89363	ADCY3;ADCY5;CACNA1B;CACNA1D;GABRA3;GABRB3;GABRE;GNG10;GNG11;GNG2;GNG3;GNGT2;SLC38A3;SLC38A5	Rumen	G15m_G0d_down
bom04510	Focal adhesion	Cellular Processes	Cellular community - eukaryotes	23	0.000469044	2.13102	CAV3;CCND3;COL1A1;COL1A2;COL2A1;COL4A1;COL4A2;COL4A5;COL4A6;COL6A1;COL6A2;COL6A6;COL9A1;COL9A3;ITGA10;ITGA5;ITGA7;LAMA4;LOC102268113;SHC2;THBS3;TNXB;VAV2	Rumen	G15m_G0d_down
bom04925	Aldosterone synthesis and secretion	Organismal Systems	Endocrine system	14	0.000777858	2.6332	ADCY3;ADCY5;ATP1A1;ATP1A3;ATP1B1;CACNA1D;CACNA1G;CAMK2A;CREB3L1;DAGLA;LOC102282116;LOC102286123;NR4A1;NR4A2	Rumen	G15m_G0d_down
bom04725	Cholinergic synapse	Organismal Systems	Nervous system	15	0.000988401	2.47482	ACHE;ADCY3;ADCY5;CACNA1B;CACNA1D;CAMK2A;CHRNB4;CREB3L1;GNG10;GNG11;GNG2;GNG3;GNGT2;SLC18A3;SLC5A7	Rumen	G15m_G0d_down
bom05165	Human papillomavirus infection	Human Diseases	Infectious disease: viral	32	0.00107829	1.77544	ATP6V0A4;ATP6V1G2;CCND3;COL1A1;COL1A2;COL2A1;COL4A1;COL4A2;COL4A5;COL4A6;COL6A1;COL6A2;COL6A6;COL9A1;COL9A3;CREB3L1;DVL2;HES4;HEY1;HEYL;ITGA10;ITGA5;ITGA7;LAMA4;LOC102268113;LOC102286123;PPP2R2B;THBS3;TNXB;WNT2B;WNT3;WNT7A	Rumen	G15m_G0d_down
bom05205	Proteoglycans in cancer	Human Diseases	Cancer: overview	22	0.00120114	2.02838	CAMK2A;CAV3;CD44;COL1A1;COL1A2;FGFR1;GPC3;IGF2;ITGA5;MYC;PLCE1;PTCH1;RRAS2;SDC2;SMO;TIMP3;TWIST1;TWIST2;VAV2;WNT2B;WNT3;WNT7A	Rumen	G15m_G0d_down
bom04726	Serotonergic synapse	Organismal Systems	Nervous system	15	0.0018216	2.33164	ADCY5;APP;CACNA1B;CACNA1D;DDC;DUSP1;GABRB3;GNG10;GNG11;GNG2;GNG3;GNGT2;LOC102280731;LOC102286123;TPH1	Rumen	G15m_G0d_down
bom04723	Retrograde endocannabinoid signaling	Organismal Systems	Nervous system	17	0.0018618	2.19004	ADCY3;ADCY5;CACNA1B;CACNA1D;CNR1;DAGLA;GABRA3;GABRB3;GABRE;GNG10;GNG11;GNG2;GNG3;GNGT2;GRIA1;GRIA4;MGLL	Rumen	G15m_G0d_down
bom04918	Thyroid hormone synthesis	Organismal Systems	Endocrine system	11	0.00190328	2.75859	ADCY3;ADCY5;ATP1A1;ATP1A3;ATP1B1;CREB3L1;GPX1;GPX7;GPX8;LOC102286123;LRP2	Rumen	G15m_G0d_down
bom04024	cAMP signaling pathway	Environmental Information Processing	Signal transduction	24	0.00196437	1.88873	ADCY3;ADCY5;ADCYAP1R1;ATP1A1;ATP1A3;ATP1B1;CACNA1D;CAMK2A;CREB3L1;EDNRA;GLI1;GRIA1;GRIA4;LOC102275331;LOC102286123;NPY;PLCE1;PTCH1;PTGER3;RRAS2;SST;VAV2;VIP;VIPR2	Rumen	G15m_G0d_down
bom04911	Insulin secretion	Organismal Systems	Endocrine system	12	0.00206466	2.59429	ABCC8;ADCY3;ADCY5;ADCYAP1R1;ATP1A1;ATP1A3;ATP1B1;CACNA1D;CAMK2A;CREB3L1;KCNJ11;LOC102286123	Rumen	G15m_G0d_down
bom04390	Hippo signaling pathway	Environmental Information Processing	Signal transduction	18	0.00219221	2.10283	BMP4;CCND3;CTGF;CTNNA2;DLG4;DVL2;FGF1;GLI2;ID2;LOC102286770;MYC;NKD2;PPP2R2B;TGFB3;WNT2B;WNT3;WNT7A;YWHAQ	Rumen	G15m_G0d_down
bom00280	Valine, leucine and isoleucine degradation	Metabolism	Amino acid metabolism	20	1.33397e-14	8.8482	ACAA2;ACADS;ACADSB;ACSF3;ALDH6A1;BCKDHA;DLD;ECHS1;HADH;HADHB;HIBCH;HMGCL;HMGCS2;IVD;MCCC1;MCCC2;MCEE;MUT;PCCA;PCCB	Rumen	GAdult_G0d_up
bom00640	Propanoate metabolism	Metabolism	Carbohydrate metabolism	13	3.3138e-10	9.23698	ACADS;ACSS2;ALDH6A1;BCKDHA;DLD;ECHDC1;ECHS1;HIBCH;MCEE;MUT;PCCA;PCCB;SUCLG2	Rumen	GAdult_G0d_up
bom00980	Metabolism of xenobiotics by cytochrome P450	Metabolism	Xenobiotics biodegradation and metabolism	17	4.52991e-10	6.42921	ADH5;GSTK1;LOC102264665;LOC102264698;LOC102265481;LOC102267279;LOC102270864;LOC102272205;LOC102279872;LOC102281969;LOC102282379;LOC102282831;LOC102283235;LOC102283655;LOC102284246;MGST3;UGT2A1	Rumen	GAdult_G0d_up
bom00982	Drug metabolism - cytochrome P450	Metabolism	Xenobiotics biodegradation and metabolism	16	1.34965e-09	6.46834	ADH5;FMO4;FMO5;GSTK1;LOC102264665;LOC102264698;LOC102270864;LOC102272205;LOC102281969;LOC102282379;LOC102282831;LOC102283655;LOC102284246;MAOA;MGST3;UGT2A1	Rumen	GAdult_G0d_up
bom00020	Citrate cycle (TCA cycle)	Metabolism	Carbohydrate metabolism	12	3.16739e-09	8.7929	CS;DLAT;DLD;DLST;IDH1;IDH3B;MDH2;PCK2;PDHA1;SDHC;SDHD;SUCLG2	Rumen	GAdult_G0d_up
bom00620	Pyruvate metabolism	Metabolism	Carbohydrate metabolism	13	2.64597e-08	6.77379	ACSS2;ADH5;AKR1A1;DLAT;DLD;LDHD;LOC102284246;MDH2;ME1;ME2;ME3;PCK2;PDHA1	Rumen	GAdult_G0d_up
bom00140	Steroid hormone biosynthesis	Metabolism	Lipid metabolism	16	3.24812e-08	5.28399	HSD11B2;HSD17B2;LOC102264665;LOC102267155;LOC102269337;LOC102270864;LOC102271453;LOC102272308;LOC102272594;LOC102282379;LOC102282831;LOC102283235;LOC102283454;LOC102284205;LOC102284686;UGT2A1	Rumen	GAdult_G0d_up
bom05204	Chemical carcinogenesis - DNA adducts	Human Diseases	Cancer: overview	14	1.49586e-07	5.47113	GSTK1;LOC102264665;LOC102264698;LOC102270864;LOC102272205;LOC102275700;LOC102281969;LOC102282379;LOC102282831;LOC102283235;LOC102283655;LOC102284686;MGST3;UGT2A1	Rumen	GAdult_G0d_up
bom00983	Drug metabolism - other enzymes	Metabolism	Xenobiotics biodegradation and metabolism	15	2.18519e-07	4.95374	CDA;CES2;CMPK1;LOC102264665;LOC102264698;LOC102270864;LOC102272205;LOC102275700;LOC102281969;LOC102282379;LOC102282831;LOC102283655;MGST3;TPMT;UGT2A1	Rumen	GAdult_G0d_up
bom00630	Glyoxylate and dicarboxylate metabolism	Metabolism	Carbohydrate metabolism	10	4.90957e-07	7.32741	ACSS2;CS;DLD;GLYCTK;MCEE;MDH2;MUT;PCCA;PCCB;SHMT1	Rumen	GAdult_G0d_up
bom00830	Retinol metabolism	Metabolism	Metabolism of cofactors and vitamins	13	5.51794e-06	4.41769	ADH5;ALDH1A1;LOC102264665;LOC102266920;LOC102270864;LOC102282379;LOC102282831;LOC102283235;LOC102284246;LOC102284686;RETSAT;SDR16C5;UGT2A1	Rumen	GAdult_G0d_up
bom00480	Glutathione metabolism	Metabolism	Metabolism of other amino acids	12	7.95687e-06	4.61267	GCLM;GPX3;GSR;GSS;GSTK1;IDH1;LOC102264698;LOC102272205;LOC102281969;LOC102283655;MGST3;PRDX6	Rumen	GAdult_G0d_up
bom04146	Peroxisome	Cellular Processes	Transport and catabolism	14	1.07597e-05	3.90795	AMACR;CROT;ECH1;EPHX2;GSTK1;HMGCL;IDH1;LOC102268462;NUDT12;PECR;PEX3;PMVK;PRDX5;SLC27A2	Rumen	GAdult_G0d_up
bom00040	Pentose and glucuronate interconversions	Metabolism	Carbohydrate metabolism	8	1.10422e-05	6.94747	AKR1A1;LOC102264665;LOC102270864;LOC102282379;LOC102282831;SORD;UGDH;UGT2A1	Rumen	GAdult_G0d_up
bom00100	Steroid biosynthesis	Metabolism	Lipid metabolism	7	1.16156e-05	8.2067	EBP;LIPA;LOC102272075;LSS;MSMO1;SOAT1;TM7SF2	Rumen	GAdult_G0d_up
bom04640	Hematopoietic cell lineage	Organismal Systems	Immune system	15	2.20746e-05	3.48233	CD1E;CD2;CD3D;CD3E;CD4;CD5;CD9;FCER2;IL1R2;IL6R;LOC102269342;LOC102271676;LOC102282998;LOC102283463;TFRC	Rumen	GAdult_G0d_up
bom00790	Folate biosynthesis	Metabolism	Metabolism of cofactors and vitamins	9	4.4124e-05	5.14706	ALPL;GGH;LOC102267155;LOC102269337;LOC102271453;LOC102272308;LOC102272594;LOC102283454;LOC102284205	Rumen	GAdult_G0d_up
bom04913	Ovarian steroidogenesis	Organismal Systems	Endocrine system	11	5.24318e-05	4.16008	HSD17B2;LOC102267155;LOC102269337;LOC102271453;LOC102272308;LOC102272594;LOC102283235;LOC102283454;LOC102284205;LOC102286372;LOC102286944	Rumen	GAdult_G0d_up
bom00053	Ascorbate and aldarate metabolism	Metabolism	Carbohydrate metabolism	7	5.9854e-05	6.56536	AKR1A1;LOC102264665;LOC102270864;LOC102282379;LOC102282831;UGDH;UGT2A1	Rumen	GAdult_G0d_up
bom00071	Fatty acid degradation	Metabolism	Lipid metabolism	9	7.97166e-05	4.79612	ACAA2;ACADS;ACADSB;ADH5;CPT2;ECHS1;HADH;HADHB;LOC102284246	Rumen	GAdult_G0d_up
bom04974	Protein digestion and absorption	Organismal Systems	Digestive system	30	1.37595e-15	5.89989	ACE2;ATP1A3;ATP1B1;COL11A1;COL12A1;COL13A1;COL14A1;COL16A1;COL17A1;COL1A1;COL1A2;COL21A1;COL23A1;COL3A1;COL4A1;COL4A2;COL4A5;COL4A6;COL5A1;COL5A2;COL5A3;COL6A1;COL6A2;COL6A6;COL7A1;COL9A3;LOC102268113;LOC102285924;SLC1A1;SLC1A5	Rumen	GAdult_G0d_down
bom04512	ECM-receptor interaction	Environmental Information Processing	Signaling molecules and interaction	23	8.62464e-14	6.91193	CD44;COL1A1;COL1A2;COL4A1;COL4A2;COL4A5;COL4A6;COL6A1;COL6A2;COL6A6;COL9A3;FRAS1;FREM2;ITGA10;ITGA5;LAMA2;LAMA3;LOC102268113;LOC102277745;NPNT;SPP1;SV2C;TNXB	Rumen	GAdult_G0d_down
bom04151	PI3K-Akt signaling pathway	Environmental Information Processing	Signal transduction	34	1.03496e-06	2.45113	ANGPT4;CHRM1;COL1A1;COL1A2;COL4A1;COL4A2;COL4A5;COL4A6;COL6A1;COL6A2;COL6A6;COL9A3;CREB3L1;EFNA2;FGF7;FGFR1;FGFR4;GNG2;GNGT2;IGF2;ITGA10;ITGA5;LAMA2;LAMA3;LOC102268113;LOC102277745;LOC102279846;MYC;NGFR;NTRK2;PIK3AP1;PKN3;SPP1;TNXB	Rumen	GAdult_G0d_down
bom04510	Focal adhesion	Cellular Processes	Cellular community - eukaryotes	21	2.18862e-05	2.76685	CAV3;COL1A1;COL1A2;COL4A1;COL4A2;COL4A5;COL4A6;COL6A1;COL6A2;COL6A6;COL9A3;ITGA10;ITGA5;LAMA2;LAMA3;LOC102268113;LOC102277745;SHC2;SPP1;TNXB;VAV2	Rumen	GAdult_G0d_down
bom05146	Amoebiasis	Human Diseases	Infectious disease: parasitic	14	2.67153e-05	3.6354	ARG1;COL1A1;COL1A2;COL3A1;COL4A1;COL4A2;COL4A5;COL4A6;LAMA2;LAMA3;LOC102267172;LOC102269246;LOC102286123;TGFB3	Rumen	GAdult_G0d_down
bom04514	Cell adhesion molecules	Environmental Information Processing	Signaling molecules and interaction	17	9.56159e-05	2.84178	ALCAM;CD276;CD34;CDH2;CLDN11;CLDN5;CNTN2;JAM2;L1CAM;LOC102284715;LRRC4B;NCAM1;NCAM2;NEGR1;NRCAM;PDCD1;VTCN1	Rumen	GAdult_G0d_down
bom04926	Relaxin signaling pathway	Organismal Systems	Endocrine system	15	0.000105741	3.06254	ACTA2;ADCY3;COL1A1;COL1A2;COL3A1;COL4A1;COL4A2;COL4A5;COL4A6;CREB3L1;GNG2;GNGT2;LOC102286123;MMP2;SHC2	Rumen	GAdult_G0d_down
bom04350	TGF-beta signaling pathway	Environmental Information Processing	Signal transduction	12	0.000135088	3.52697	BMP4;BMP5;CHRD;FBN1;FST;ID3;LTBP1;MYC;PITX2;TGFB3;TGIF1;TGIF2	Rumen	GAdult_G0d_down
bom05165	Human papillomavirus infection	Human Diseases	Infectious disease: viral	26	0.00038687	2.05133	ATP6V0A4;COL1A1;COL1A2;COL4A1;COL4A2;COL4A5;COL4A6;COL6A1;COL6A2;COL6A6;COL9A3;CREB3L1;HES4;HEY1;ITGA10;ITGA5;LAMA2;LAMA3;LOC102268113;LOC102277745;LOC102286123;SPP1;TNXB;WNT2B;WNT3;WNT7A	Rumen	GAdult_G0d_down
bom00532	Glycosaminoglycan biosynthesis - chondroitin sulfate / dermatan sulfate	Metabolism	Glycan biosynthesis and metabolism	5	0.000406053	7.42949	CHPF;CHPF2;CHST14;CHST15;UST	Rumen	GAdult_G0d_down
bom04933	AGE-RAGE signaling pathway in diabetic complications	Human Diseases	Endocrine and metabolic disease	12	0.00057078	3.02787	COL1A1;COL1A2;COL3A1;COL4A1;COL4A2;COL4A5;COL4A6;EGR1;F3;MMP2;TGFB3;THBD	Rumen	GAdult_G0d_down
bom05205	Proteoglycans in cancer	Human Diseases	Cancer: overview	18	0.000615726	2.35996	CAV3;CD44;COL1A1;COL1A2;FGFR1;GPC3;IGF2;ITGA5;MMP2;MYC;PTCH1;RRAS2;SMO;TWIST2;VAV2;WNT2B;WNT3;WNT7A	Rumen	GAdult_G0d_down
bom00330	Arginine and proline metabolism	Metabolism	Amino acid metabolism	8	0.000626369	4.1148	ARG1;AZIN2;OAT;ODC1;P4HA2;P4HA3;PRODH;SRM	Rumen	GAdult_G0d_down
bom05217	Basal cell carcinoma	Human Diseases	Cancer: specific types	8	0.00225807	3.39634	BMP4;GLI1;GLI2;PTCH1;SMO;WNT2B;WNT3;WNT7A	Rumen	GAdult_G0d_down
bom04721	Synaptic vesicle cycle	Organismal Systems	Nervous system	9	0.0026261	3.04703	ATP6V0A4;CACNA1B;CPLX2;DNM1;SLC18A3;SLC1A1;SLC1A3;STXBP1;SYT1	Rumen	GAdult_G0d_down
bom05033	Nicotine addiction	Human Diseases	Substance dependence	6	0.00299872	4.1148	CACNA1B;GABRA3;GABRB3;GABRE;GRIA1;GRIA4	Rumen	GAdult_G0d_down
bom05206	MicroRNAs in cancer	Human Diseases	Cancer: overview	14	0.00329453	2.28321	CD44;DNMT3A;EFNA2;FSCN1;IGF2BP1;ITGA5;LOC102265841;MMP16;MYC;RECK;SPRY2;STMN1;TNXB;WNT3	Rumen	GAdult_G0d_down
bom05200	Pathways in cancer	Human Diseases	Cancer: overview	33	0.00346522	1.63449	ADCY3;BMP4;COL4A1;COL4A2;COL4A5;COL4A6;CTNNA2;DCC;FGF7;FGFR1;FGFR4;GLI1;GLI2;GNG2;GNGT2;HEY1;IGF2;LAMA2;LAMA3;LOC102271929;LOC102276933;LOC102279846;LOC102286123;MMP2;MYC;PTCH1;RARB;RET;SMO;TGFB3;WNT2B;WNT3;WNT7A	Rumen	GAdult_G0d_down
bom00564	Glycerophospholipid metabolism	Metabolism	Lipid metabolism	10	0.00576532	2.54725	ACHE;CHKA;CHPT1;DGKD;GPAT3;LCAT;MBOAT1;MBOAT2;PLPP3;PLPP4	Rumen	GAdult_G0d_down
bom04964	Proximal tubule bicarbonate reclamation	Organismal Systems	Excretory system	4	0.00822981	4.86294	ATP1A3;ATP1B1;LOC102266781;SLC38A3	Rumen	GAdult_G0d_down
bom00140	Steroid hormone biosynthesis	Metabolism	Lipid metabolism	5	3.72057e-06	20.5305	HSD17B2;LOC102269337;LOC102270864;LOC102282831;LOC102284205	Rumen	G60d_G20d_up
bom00982	Drug metabolism - cytochrome P450	Metabolism	Xenobiotics biodegradation and metabolism	3	0.000989573	15.0793	LOC102270864;LOC102274807;LOC102282831	Rumen	G60d_G20d_up
bom05204	Chemical carcinogenesis - DNA adducts	Human Diseases	Cancer: overview	3	0.0010924	14.5767	LOC102270864;LOC102274807;LOC102282831	Rumen	G60d_G20d_up
bom00980	Metabolism of xenobiotics by cytochrome P450	Metabolism	Xenobiotics biodegradation and metabolism	3	0.00120176	14.1065	LOC102270864;LOC102274807;LOC102282831	Rumen	G60d_G20d_up
bom04913	Ovarian steroidogenesis	Organismal Systems	Endocrine system	3	0.00120176	14.1065	HSD17B2;LOC102269337;LOC102284205	Rumen	G60d_G20d_up
bom00830	Retinol metabolism	Metabolism	Metabolism of cofactors and vitamins	3	0.00163816	12.6754	LOC102266920;LOC102270864;LOC102282831	Rumen	G60d_G20d_up
bom00983	Drug metabolism - other enzymes	Metabolism	Xenobiotics biodegradation and metabolism	3	0.00177879	12.3183	LOC102270864;LOC102274807;LOC102282831	Rumen	G60d_G20d_up
bom00053	Ascorbate and aldarate metabolism	Metabolism	Carbohydrate metabolism	2	0.00324913	23.3227	LOC102270864;LOC102282831	Rumen	G60d_G20d_up
bom00040	Pentose and glucuronate interconversions	Metabolism	Carbohydrate metabolism	2	0.00378534	21.5951	LOC102270864;LOC102282831	Rumen	G60d_G20d_up
bom04710	Circadian rhythm	Organismal Systems	Environmental adaptation	2	0.0046614	19.4356	BHLHE41;NR1D1	Rumen	G60d_G20d_up
bom00051	Fructose and mannose metabolism	Metabolism	Carbohydrate metabolism	2	0.00630854	16.659	ENOSF1;FBP1	Rumen	G60d_G20d_up
bom00860	Porphyrin and chlorophyll metabolism	Metabolism	Metabolism of cofactors and vitamins	2	0.00740629	15.3439	LOC102270864;LOC102282831	Rumen	G60d_G20d_up
bom00790	Folate biosynthesis	Metabolism	Metabolism of cofactors and vitamins	2	0.00858408	14.2211	LOC102269337;LOC102284205	Rumen	G60d_G20d_up
bom05134	Legionellosis	Human Diseases	Infectious disease: bacterial	2	0.015617	10.4119	HSPA2;LOC102278697	Rumen	G60d_G20d_up
bom04213	Longevity regulating pathway - multiple species	Organismal Systems	Aging	2	0.0177982	9.71778	HSPA2;LOC102278697	Rumen	G60d_G20d_up
bom05207	Chemical carcinogenesis - receptor activation	NA	NA	3	0.0303957	4.373	LOC102270864;LOC102274807;LOC102282831	Rumen	G60d_G20d_up
bom00590	Arachidonic acid metabolism	Metabolism	Lipid metabolism	2	0.0347922	6.77984	LOC102269337;LOC102284205	Rumen	G60d_G20d_up
bom04612	Antigen processing and presentation	Organismal Systems	Immune system	2	0.0385731	6.40733	HSPA2;LOC102278697	Rumen	G60d_G20d_up
bom04976	Bile secretion	Organismal Systems	Digestive system	2	0.0417065	6.13754	LOC102270864;LOC102282831	Rumen	G60d_G20d_up
bom05146	Amoebiasis	Human Diseases	Infectious disease: parasitic	2	0.0482505	5.66084	IL1R2;SERPINB10	Rumen	G60d_G20d_up
bom04960	Aldosterone-regulated sodium reabsorption	Organismal Systems	Excretory system	3	0.000415601	20.261	ATP1B1;SCNN1B;SCNN1G	Rumen	G60d_G20d_down
bom04972	Pancreatic secretion	Organismal Systems	Digestive system	3	0.00811184	7.20824	ATP1B1;CFTR;LOC102270735	Rumen	G60d_G20d_down
bom00600	Sphingolipid metabolism	Metabolism	Lipid metabolism	2	0.0169	9.99543	CERS3;SMPD3	Rumen	G60d_G20d_down
bom05226	Gastric cancer	Human Diseases	Cancer: specific types	3	0.0209276	5.06525	RARB;WNT3;WNT7A	Rumen	G60d_G20d_down
bom05217	Basal cell carcinoma	Human Diseases	Cancer: specific types	2	0.0260863	7.93288	WNT3;WNT7A	Rumen	G60d_G20d_down
bom04978	Mineral absorption	Organismal Systems	Digestive system	2	0.031702	7.13959	ATP1B1;SLC26A9	Rumen	G60d_G20d_down
bom04971	Gastric acid secretion	Organismal Systems	Digestive system	2	0.0404674	6.24714	ATP1B1;CFTR	Rumen	G60d_G20d_down
bom04742	Taste transduction	Organismal Systems	Sensory system	2	0.0423195	6.09477	SCNN1B;SCNN1G	Rumen	G60d_G20d_down
bom04657	IL-17 signaling pathway	Organismal Systems	Immune system	2	0.0470866	5.7445	S100A8;S100A9	Rumen	G60d_G20d_down
bom04976	Bile secretion	Organismal Systems	Digestive system	2	0.0551018	5.26075	ATP1B1;CFTR	Rumen	G60d_G20d_down
bom04666	Fc gamma R-mediated phagocytosis	Organismal Systems	Immune system	2	0.0571766	5.15228	PLA2G4E;SCIN	Rumen	G60d_G20d_down
bom04970	Salivary secretion	Organismal Systems	Digestive system	2	0.0571766	5.15228	ATP1B1;LPO	Rumen	G60d_G20d_down
bom05231	Choline metabolism in cancer	Human Diseases	Cancer: overview	2	0.0582244	5.09971	PLA2G4E;SLC44A4	Rumen	G60d_G20d_down
bom00564	Glycerophospholipid metabolism	Metabolism	Lipid metabolism	2	0.0657439	4.75973	CHAT;PLA2G4E	Rumen	G60d_G20d_down
bom00603	Glycosphingolipid biosynthesis - globo and isoglobo series	Metabolism	Glycan biosynthesis and metabolism	1	0.0659545	14.6992	FUT1	Rumen	G60d_G20d_down
bom04916	Melanogenesis	Organismal Systems	Endocrine system	2	0.0668438	4.71482	WNT3;WNT7A	Rumen	G60d_G20d_down
bom04964	Proximal tubule bicarbonate reclamation	Organismal Systems	Excretory system	1	0.084535	11.3584	ATP1B1	Rumen	G60d_G20d_down
bom04614	Renin-angiotensin system	Organismal Systems	Endocrine system	1	0.0991404	9.61099	ACE2	Rumen	G60d_G20d_down
bom04974	Protein digestion and absorption	Organismal Systems	Digestive system	2	0.102465	3.67479	ACE2;ATP1B1	Rumen	G60d_G20d_down
bom04650	Natural killer cell mediated cytotoxicity	Organismal Systems	Immune system	2	0.10373	3.64797	LOC102271210;RAET1E	Rumen	G60d_G20d_down
bom05167	Kaposi sarcoma-associated herpesvirus infection	Human Diseases	Infectious disease: viral	6	0.000517454	5.81774	CXCL8;E2F1;IFNAR1;LOC102269246;LOC102277620;PTGS2	Rumen	G15m_G60d_up
bom04657	IL-17 signaling pathway	Organismal Systems	Immune system	4	0.000915524	9.13898	CXCL8;LOC102268679;LOC102269246;PTGS2	Rumen	G15m_G60d_up
bom05160	Hepatitis C	Human Diseases	Infectious disease: viral	5	0.0012081	6.17307	E2F1;IFNAR1;LOC102277620;RNASEL;SOCS3	Rumen	G15m_G60d_up
bom05164	Influenza A	Human Diseases	Infectious disease: viral	5	0.0015387	5.84626	CXCL8;IFNAR1;LOC102277620;RNASEL;SOCS3	Rumen	G15m_G60d_up
bom00260	Glycine, serine and threonine metabolism	Metabolism	Amino acid metabolism	3	0.0016508	12.6876	ALAS2;CTH;SDS	Rumen	G15m_G60d_up
bom04064	NF-kappa B signaling pathway	Environmental Information Processing	Signal transduction	4	0.00240891	7.0362	CXCL8;LOC102269246;LOC102281707;PTGS2	Rumen	G15m_G60d_up
bom04668	TNF signaling pathway	Environmental Information Processing	Signal transduction	4	0.00240891	7.0362	LOC102268679;LOC102269246;PTGS2;SOCS3	Rumen	G15m_G60d_up
bom05134	Legionellosis	Human Diseases	Infectious disease: bacterial	3	0.00273464	10.6485	CXCL8;LOC102269246;LOC102277620	Rumen	G15m_G60d_up
bom05417	Lipid and atherosclerosis	Human Diseases	Cardiovascular disease	5	0.00461288	4.53819	CXCL8;ERO1A;LOC102269246;LOC102277620;LOC102281707	Rumen	G15m_G60d_up
bom00830	Retinol metabolism	Metabolism	Metabolism of cofactors and vitamins	3	0.00493941	8.64229	ALDH1A3;LOC102284686;RETSAT	Rumen	G15m_G60d_up
bom04978	Mineral absorption	Organismal Systems	Digestive system	3	0.00514261	8.51883	LOC102276607;LOC102279288;SLC5A1	Rumen	G15m_G60d_up
bom04918	Thyroid hormone synthesis	Organismal Systems	Endocrine system	3	0.0062341	7.95091	DUOX2;DUOXA2;GSR	Rumen	G15m_G60d_up
bom04061	Viral protein interaction with cytokine and cytokine receptor	Environmental Information Processing	Signaling molecules and interaction	3	0.00880672	7.01551	CXCL8;LOC102268679;LOC102269246	Rumen	G15m_G60d_up
bom05161	Hepatitis B	Human Diseases	Infectious disease: viral	4	0.00903073	4.84812	CXCL8;E2F1;IFNAR1;LOC102277620	Rumen	G15m_G60d_up
bom04621	NOD-like receptor signaling pathway	Organismal Systems	Immune system	4	0.0108445	4.5959	CXCL8;IFNAR1;LOC102269246;RNASEL	Rumen	G15m_G60d_up
bom05222	Small cell lung cancer	Human Diseases	Cancer: specific types	3	0.0129625	6.08488	E2F1;LOC102277620;PTGS2	Rumen	G15m_G60d_up
bom04620	Toll-like receptor signaling pathway	Organismal Systems	Immune system	3	0.0133213	6.02342	CXCL8;IFNAR1;LOC102281707	Rumen	G15m_G60d_up
bom05323	Rheumatoid arthritis	Human Diseases	Immune disease	3	0.0155932	5.67922	CXCL8;LOC102268679;LOC102269246	Rumen	G15m_G60d_up
bom04060	Cytokine-cytokine receptor interaction	Environmental Information Processing	Signaling molecules and interaction	5	0.0158359	3.35765	CXCL8;IFNAR1;IFNLR1;LOC102268679;LOC102269246	Rumen	G15m_G60d_up
bom05219	Bladder cancer	Human Diseases	Cancer: specific types	2	0.0179132	9.69623	CXCL8;E2F1	Rumen	G15m_G60d_up
bom04512	ECM-receptor interaction	Environmental Information Processing	Signaling molecules and interaction	8	4.36343e-08	15.1184	COL4A1;COL4A2;COL4A5;COL6A1;FREM2;HSPG2;LAMA4;LOC102268113	Rumen	G15m_G60d_down
bom04510	Focal adhesion	Cellular Processes	Cellular community - eukaryotes	8	2.29747e-05	6.62827	COL4A1;COL4A2;COL4A5;COL6A1;LAMA4;LOC102268113;PDGFA;TLN2	Rumen	G15m_G60d_down
bom04974	Protein digestion and absorption	Organismal Systems	Digestive system	6	0.000143226	7.42025	ATP1A3;COL4A1;COL4A2;COL4A5;COL6A1;LOC102268113	Rumen	G15m_G60d_down
bom05222	Small cell lung cancer	Human Diseases	Cancer: specific types	4	0.00265871	6.86499	COL4A1;COL4A2;COL4A5;LAMA4	Rumen	G15m_G60d_down
bom05146	Amoebiasis	Human Diseases	Infectious disease: parasitic	4	0.00318398	6.53174	COL4A1;COL4A2;COL4A5;LAMA4	Rumen	G15m_G60d_down
bom04933	AGE-RAGE signaling pathway in diabetic complications	Human Diseases	Endocrine and metabolic disease	4	0.00353102	6.34688	COL4A1;COL4A2;COL4A5;PLCE1	Rumen	G15m_G60d_down
bom04360	Axon guidance	Organismal Systems	Development and regeneration	5	0.00455718	4.57044	CXCL12;L1CAM;NFATC4;SEMA3B;SLIT2	Rumen	G15m_G60d_down
bom04151	PI3K-Akt signaling pathway	Environmental Information Processing	Signal transduction	7	0.00601542	3.17344	COL4A1;COL4A2;COL4A5;COL6A1;LAMA4;LOC102268113;PDGFA	Rumen	G15m_G60d_down
bom04926	Relaxin signaling pathway	Organismal Systems	Endocrine system	4	0.0074699	5.13564	COL4A1;COL4A2;COL4A5;EDNRB	Rumen	G15m_G60d_down
bom05200	Pathways in cancer	Human Diseases	Cancer: overview	8	0.0136046	2.49174	COL4A1;COL4A2;COL4A5;CXCL12;EDNRA;EDNRB;LAMA4;PDGFA	Rumen	G15m_G60d_down
bom05165	Human papillomavirus infection	Human Diseases	Infectious disease: viral	6	0.0147056	2.97686	COL4A1;COL4A2;COL4A5;COL6A1;LAMA4;LOC102268113	Rumen	G15m_G60d_down
bom04514	Cell adhesion molecules	Environmental Information Processing	Signaling molecules and interaction	4	0.0147831	4.20481	CNTNAP1;JAM2;L1CAM;NCAM1	Rumen	G15m_G60d_down
bom04080	Neuroactive ligand-receptor interaction	Environmental Information Processing	Signaling molecules and interaction	6	0.0163337	2.90822	AGTR2;CCKAR;EDNRA;EDNRB;GABRA3;GRID2	Rumen	G15m_G60d_down
bom04020	Calcium signaling pathway	Environmental Information Processing	Signal transduction	5	0.0164759	3.33715	CCKAR;EDNRA;EDNRB;PDGFA;PLCE1	Rumen	G15m_G60d_down
bom04022	cGMP-PKG signaling pathway	Environmental Information Processing	Signal transduction	4	0.0187939	3.91145	ATP1A3;EDNRA;EDNRB;NFATC4	Rumen	G15m_G60d_down
bom04919	Thyroid hormone signaling pathway	Organismal Systems	Endocrine system	3	0.0356767	4.13588	ATP1A3;PLCE1;SLC16A2	Rumen	G15m_G60d_down
bom00561	Glycerolipid metabolism	Metabolism	Lipid metabolism	2	0.0615916	4.94683	LPL;MBOAT2	Rumen	G15m_G60d_down
bom04261	Adrenergic signaling in cardiomyocytes	Organismal Systems	Circulatory system	3	0.0652623	3.23447	AGTR2;ATP1A3;SCN7A	Rumen	G15m_G60d_down
bom04310	Wnt signaling pathway	Environmental Information Processing	Signal transduction	3	0.0788229	2.98566	NFATC4;PRICKLE1;RSPO3	Rumen	G15m_G60d_down
bom04721	Synaptic vesicle cycle	Organismal Systems	Nervous system	2	0.0799737	4.25803	SLC1A3;SYT1	Rumen	G15m_G60d_down
bom01523	Antifolate resistance	Human Diseases	Drug resistance: antineoplastic	1	0.010037	99.3864	LOC102287322	Rumen	GAdult_15m_up
bom02010	ABC transporters	Environmental Information Processing	Membrane transport	1	0.0139014	71.6885	LOC102287322	Rumen	GAdult_15m_up
bom04976	Bile secretion	Organismal Systems	Digestive system	1	0.0216075	46.0316	LOC102287322	Rumen	GAdult_15m_up
bom00230	Purine metabolism	Metabolism	Nucleotide metabolism	1	0.0304096	32.6343	PDE6C	Rumen	GAdult_15m_up
bom04024	cAMP signaling pathway	Environmental Information Processing	Signal transduction	1	0.0539098	18.2971	LOC102287322	Rumen	GAdult_15m_up
bom05133	Pertussis	Human Diseases	Infectious disease: bacterial	3	0.00100125	14.908	C1QB;C1QC;C4BPA	Rumen	GAdult_15m_down
bom05322	Systemic lupus erythematosus	Human Diseases	Immune disease	4	0.00118439	8.32556	C1QB;C1QC;LOC102273538;LOC102279439	Rumen	GAdult_15m_down
bom04610	Complement and coagulation cascades	Organismal Systems	Immune system	3	0.00136383	13.4004	C1QB;C1QC;C4BPA	Rumen	GAdult_15m_down
bom05150	Staphylococcus aureus infection	Human Diseases	Infectious disease: bacterial	3	0.00213419	11.4677	C1QB;C1QC;LOC102273538	Rumen	GAdult_15m_down
bom04380	Osteoclast differentiation	Organismal Systems	Development and regeneration	2	0.0344309	6.79565	IFNAR1;LOC102273538	Rumen	GAdult_15m_down
bom05142	Chagas disease	Human Diseases	Infectious disease: parasitic	2	0.0344309	6.79565	C1QB;C1QC	Rumen	GAdult_15m_down
bom04010	MAPK signaling pathway	Environmental Information Processing	Signal transduction	3	0.0354737	4.08437	DUSP4;DUSP5;TGFA	Rumen	GAdult_15m_down
bom04060	Cytokine-cytokine receptor interaction	Environmental Information Processing	Signaling molecules and interaction	3	0.0367183	4.02918	IFNAR1;IL36B;LOC102269246	Rumen	GAdult_15m_down
bom04650	Natural killer cell mediated cytotoxicity	Organismal Systems	Immune system	2	0.0458665	5.80358	IFNAR1;LOC102273538	Rumen	GAdult_15m_down
bom05171	Coronavirus disease - COVID-19	Human Diseases	Infectious disease: viral	3	0.047849	3.62503	C1QB;C1QC;IFNAR1	Rumen	GAdult_15m_down
bom05160	Hepatitis C	Human Diseases	Infectious disease: viral	2	0.0611705	4.93845	CLDN17;IFNAR1	Rumen	GAdult_15m_down
bom04145	Phagosome	Cellular Processes	Transport and catabolism	2	0.063194	4.84812	LOC102273538;MSR1	Rumen	GAdult_15m_down
bom05164	Influenza A	Human Diseases	Infectious disease: viral	2	0.0673099	4.67701	IFNAR1;TMPRSS4	Rumen	GAdult_15m_down
bom04621	NOD-like receptor signaling pathway	Organismal Systems	Immune system	2	0.0694015	4.5959	IFNAR1;LOC102269246	Rumen	GAdult_15m_down
bom00062	Fatty acid elongation	Metabolism	Lipid metabolism	1	0.070545	13.7085	ELOVL7	Rumen	GAdult_15m_down
bom01040	Biosynthesis of unsaturated fatty acids	Metabolism	Lipid metabolism	1	0.070545	13.7085	ELOVL7	Rumen	GAdult_15m_down
bom05167	Kaposi sarcoma-associated herpesvirus infection	Human Diseases	Infectious disease: viral	2	0.0929891	3.87849	IFNAR1;LOC102269246	Rumen	GAdult_15m_down
bom05417	Lipid and atherosclerosis	Human Diseases	Cardiovascular disease	2	0.103968	3.63055	ABCA1;LOC102269246	Rumen	GAdult_15m_down
bom04613	Neutrophil extracellular trap formation	Organismal Systems	Immune system	2	0.111212	3.48724	LOC102273538;LOC102279439	Rumen	GAdult_15m_down
bom04979	Cholesterol metabolism	Organismal Systems	Digestive system	1	0.116401	8.11317	ABCA1	Rumen	GAdult_15m_down
