# Supplementary material for: Transcriptome profiling in rumen, reticulum, omasum, and abomasum tissues during the developmental transition of pre-ruminant to the ruminant in yaks
Source: Frontiers journal article supplement (doi:10.3389/fvets.2023.1204706), 2023-09-22
Supplement: Data_Sheet_1.zip [file Table S7-The top 20 mRNAs expressed in rumen.xls]

id	S0d_Rum	S20d_Rum	S60d_Rum	S15m_Rum	Adult_Rum
S100A12	3348.26	7910.8	3877.09	6072.49	4915.29
S100A9	3653.91	8358.89	2673.74	5070.53	4198.38
LOC102287882	5733.84	3432.17	3654.19	3454.82	4394.47
LOC102283503	46.7693	4324.84	4024.52	6241.6	3434.44
LOC102282154	442.694	1921.51	3353.43	5535.43	6508.75
RPS2	3702.48	2864.05	3560.77	3324.74	3314.45
LOC102269388	5990.62	5295.17	2466.12	1912.53	1024.87
KRT4	8806.51	4562.41	331.247	34.9485	12.2886
RPS8	3422.43	2201.34	2508.19	2226.23	2456.55
KRT6A	262.011	2016.54	2256.25	4084.32	3974.93
DES	2132.81	1592.09	2154.66	1661.69	4812.1
A2ML1	1255.04	2774.86	2914.96	3120.59	2142.06
LOC102268548	269.237	1270.93	2301.96	3817.44	4171.04
LOC102282544	77.4113	3754.74	1370.26	4143.0	2467.09
LOC102266213	298.717	1213.5	2635.68	3668.41	3874.94
EEF1A1	2353.16	2069.63	2349.06	2206.27	2357.2
ACTG2	2729.99	2233.03	1854.5	806.03	3134.77
RPS3A	2792.6	1763.27	2041.69	1781.0	1962.58
LOC102271013	43.5878	1492.41	2634.54	3179.05	2884.25
RPLP0	1995.74	1639.28	2207.48	2094.32	2285.05
