# Supplementary material for: Transcriptome profiling in rumen, reticulum, omasum, and abomasum tissues during the developmental transition of pre-ruminant to the ruminant in yaks
Source: Frontiers journal article supplement (doi:10.3389/fvets.2023.1204706), 2023-09-22
Supplement: Data_Sheet_1.zip [file Table S8-The KEGG enrichment pathways in seven comparison groups in reticulum.xlsx]

## Sheet: Table S8
id	Term	Classification_level1	Classification_level2	ListHits	p-value	Enrichment_score	geneID	class	group
bom04640	Hematopoietic cell lineage	Organismal Systems	Immune system	25	7.05607e-14	6.27493	CD1E;CD2;CD37;CD3D;CD3E;CD3G;CD4;CD5;CD8A;CD8B;CR2;CSF1R;FCER2;FLT3;IL1A;IL1B;ITGAM;LOC102269342;LOC102271117;LOC102271676;LOC102282998;LOC102283173;LOC102283463;LOC102285144;LOC102288394	Reticulum	G20d_G0d_up
bom04514	Cell adhesion molecules	Environmental Information Processing	Signaling molecules and interaction	26	5.84129e-10	4.11949	CD2;CD4;CD6;CD8A;CD8B;CLDN17;CLDN4;ICOS;ITGAL;ITGAM;ITGB2;LOC102268170;LOC102269342;LOC102271117;LOC102271676;LOC102281193;LOC102282998;LOC102283463;LOC102285144;LRRC4;OCLN;PTPRC;SELL;SELPLG;SIGLEC1;SPN	Reticulum	G20d_G0d_up
bom05340	Primary immunodeficiency	Human Diseases	Immune disease	12	8.92679e-09	8.22186	CD3D;CD3E;CD4;CD79A;CD8A;CD8B;ICOS;IL2RG;LOC102280800;LOC102283173;PTPRC;ZAP70	Reticulum	G20d_G0d_up
bom05150	Staphylococcus aureus infection	Human Diseases	Infectious disease: bacterial	19	1.8078e-08	4.63138	C3;C3AR1;DSG1;ITGAL;ITGAM;ITGB2;KRT24;KRT9;LOC102268264;LOC102269342;LOC102271117;LOC102271676;LOC102273538;LOC102281124;LOC102282998;LOC102283173;LOC102283463;LOC102285144;SELPLG	Reticulum	G20d_G0d_up
bom05164	Influenza A	Human Diseases	Infectious disease: viral	23	1.99855e-07	3.4298	CCL5;DDX58;EIF2AK2;IFIH1;IL1A;IL1B;IRF7;LOC102269342;LOC102271117;LOC102271676;LOC102282998;LOC102283231;LOC102283463;LOC102283513;LOC102285144;MX1;MX2;OAS2;PIK3CD;RSAD2;TLR7;TMPRSS2;TNFSF10	Reticulum	G20d_G0d_up
bom05140	Leishmaniasis	Human Diseases	Infectious disease: parasitic	15	2.44848e-07	4.93845	C3;IL1A;IL1B;ITGAM;ITGB2;LOC102269342;LOC102271117;LOC102271676;LOC102273538;LOC102282998;LOC102283173;LOC102283463;LOC102285144;LOC102288244;NCF1	Reticulum	G20d_G0d_up
bom05169	Epstein-Barr virus infection	Human Diseases	Infectious disease: viral	26	5.30334e-07	2.98244	B2M;CCNA2;CD3D;CD3E;CD3G;CR2;DDX58;EIF2AK2;FCER2;IRF7;ISG15;ITGAL;LOC102268170;LOC102269342;LOC102271117;LOC102271676;LOC102272934;LOC102281193;LOC102282998;LOC102283173;LOC102283231;LOC102283463;LOC102283513;LOC102285144;OAS2;PIK3CD	Reticulum	G20d_G0d_up
bom04612	Antigen processing and presentation	Organismal Systems	Immune system	15	2.30142e-06	4.17869	B2M;CD4;CD74;CD8A;CD8B;CTSS;IFI30;LOC102268170;LOC102269342;LOC102271117;LOC102271676;LOC102281193;LOC102282998;LOC102283463;LOC102285144	Reticulum	G20d_G0d_up
bom05323	Rheumatoid arthritis	Human Diseases	Immune disease	16	3.09628e-06	3.86297	ACP5;ANGPT1;CCL5;IL17A;IL1A;IL1B;ITGAL;ITGB2;LOC102269342;LOC102271117;LOC102271676;LOC102282998;LOC102283173;LOC102283463;LOC102285144;LOC102288330	Reticulum	G20d_G0d_up
bom04913	Ovarian steroidogenesis	Organismal Systems	Endocrine system	12	4.26945e-06	4.90659	ALOX5;HSD17B2;LOC102267155;LOC102269337;LOC102271453;LOC102272308;LOC102272594;LOC102283454;LOC102286372;LOC102286944;PLA2G4D;PLA2G4F	Reticulum	G20d_G0d_up
bom00280	Valine, leucine and isoleucine degradation	Metabolism	Amino acid metabolism	11	5.27771e-06	5.26147	ACADS;ACSF3;BCKDHA;BCKDHB;ECHS1;HADH;HMGCS2;MCCC1;MCEE;PCCA;PCCB	Reticulum	G20d_G0d_up
bom05152	Tuberculosis	Human Diseases	Infectious disease: bacterial	21	1.39679e-05	2.84687	C3;CD74;CORO1A;CTSS;IL1A;IL1B;ITGAM;ITGAX;ITGB2;LOC102266295;LOC102269342;LOC102271117;LOC102271676;LOC102273538;LOC102278257;LOC102282998;LOC102283173;LOC102283463;LOC102285144;NOD2;SPHK1	Reticulum	G20d_G0d_up
bom04060	Cytokine-cytokine receptor interaction	Environmental Information Processing	Signaling molecules and interaction	28	1.46783e-05	2.39804	BMP2;CCL22;CCL5;CCR4;CCR7;CD27;CD4;CSF1R;CX3CR1;CXCL17;CXCR4;CXCR6;IL17A;IL1A;IL1B;IL1RL2;IL1RN;IL20RA;IL20RB;IL22RA1;IL2RG;IL32;IL36G;IL36RN;LOC102284826;LOC102288248;LOC102288304;TNFSF10	Reticulum	G20d_G0d_up
bom00983	Drug metabolism - other enzymes	Metabolism	Xenobiotics biodegradation and metabolism	12	1.8376e-05	4.28463	CDA;CES2;CMPK1;LOC102264665;LOC102270864;LOC102272205;LOC102275700;LOC102275834;LOC102276661;LOC102282831;MGST3;UPP1	Reticulum	G20d_G0d_up
bom04940	Type I diabetes mellitus	Human Diseases	Endocrine and metabolic disease	11	1.85225e-05	4.64763	IL1A;IL1B;LOC102268170;LOC102269342;LOC102271117;LOC102271676;LOC102281193;LOC102282998;LOC102283463;LOC102285144;PRF1	Reticulum	G20d_G0d_up
bom00790	Folate biosynthesis	Metabolism	Metabolism of cofactors and vitamins	9	2.38402e-05	5.56479	ALPL;GGH;LOC102267155;LOC102269337;LOC102271453;LOC102272308;LOC102272594;LOC102283454;MOCS1	Reticulum	G20d_G0d_up
bom04061	Viral protein interaction with cytokine and cytokine receptor	Environmental Information Processing	Signaling molecules and interaction	13	2.5209e-05	3.87717	CCL22;CCL5;CCR4;CCR7;CSF1R;CX3CR1;CXCR4;IL20RA;IL20RB;IL22RA1;IL2RG;LOC102288304;TNFSF10	Reticulum	G20d_G0d_up
bom00590	Arachidonic acid metabolism	Metabolism	Lipid metabolism	13	2.86588e-05	3.83209	ALOX12B;ALOX5;GPX3;LOC102267155;LOC102269337;LOC102271453;LOC102272308;LOC102272594;LOC102279872;LOC102283454;LOC102285661;PLA2G4D;PLA2G4F	Reticulum	G20d_G0d_up
bom05321	Inflammatory bowel disease	Human Diseases	Immune disease	12	3.72848e-05	4.00275	IL17A;IL1A;IL1B;IL2RG;LOC102269342;LOC102271117;LOC102271676;LOC102282998;LOC102283463;LOC102285144;NOD2;TLR5	Reticulum	G20d_G0d_up
bom05332	Graft-versus-host disease	Human Diseases	Immune disease	11	4.6963e-05	4.22512	IL1A;IL1B;LOC102268170;LOC102269342;LOC102271117;LOC102271676;LOC102281193;LOC102282998;LOC102283463;LOC102285144;PRF1	Reticulum	G20d_G0d_up
bom05205	Proteoglycans in cancer	Human Diseases	Cancer: overview	12	1.67365e-06	5.47309	FGFR1;FLNC;IGF1;IGF2;ITGA5;ITGB1;MSN;RRAS2;STAT3;TGFB2;THBS1;VEGFA	Reticulum	G20d_G0d_down
bom05410	Hypertrophic cardiomyopathy	Human Diseases	Cardiovascular disease	7	5.13482e-05	7.15712	CACNA1C;DES;IGF1;IL6;ITGA5;ITGB1;TGFB2	Reticulum	G20d_G0d_down
bom04010	MAPK signaling pathway	Environmental Information Processing	Signal transduction	12	6.31312e-05	3.82367	AREG;CACNA1C;FGFR1;FLNC;GADD45G;HSPA6;IGF1;IGF2;RELB;RRAS2;TGFB2;VEGFA	Reticulum	G20d_G0d_down
bom04151	PI3K-Akt signaling pathway	Environmental Information Processing	Signal transduction	13	0.000155094	3.26025	AREG;CREB3L1;CREB3L2;FGFR1;IGF1;IGF2;IL6;ITGA5;ITGB1;LAMC1;OSMR;THBS1;VEGFA	Reticulum	G20d_G0d_down
bom04931	Insulin resistance	Human Diseases	Endocrine and metabolic disease	7	0.000161607	5.97521	CREB3L1;CREB3L2;GFPT2;IL6;PPP1R3C;SOCS3;STAT3	Reticulum	G20d_G0d_down
bom04510	Focal adhesion	Cellular Processes	Cellular community - eukaryotes	9	0.000316515	4.12504	ACTN1;CAPN2;FLNC;IGF1;ITGA5;ITGB1;LAMC1;THBS1;VEGFA	Reticulum	G20d_G0d_down
bom05206	MicroRNAs in cancer	Human Diseases	Cancer: overview	8	0.00036513	4.53866	HDAC4;IGF2BP1;ITGA5;SLC7A1;STAT3;TGFB2;THBS1;VEGFA	Reticulum	G20d_G0d_down
bom05144	Malaria	Human Diseases	Infectious disease: parasitic	5	0.000441336	7.75355	ACKR1;IL6;SELP;TGFB2;THBS1	Reticulum	G20d_G0d_down
bom05414	Dilated cardiomyopathy	Human Diseases	Cardiovascular disease	6	0.00059112	5.75521	CACNA1C;DES;IGF1;ITGA5;ITGB1;TGFB2	Reticulum	G20d_G0d_down
bom05412	Arrhythmogenic right ventricular cardiomyopathy	Human Diseases	Cardiovascular disease	5	0.00115673	6.28666	CACNA1C;DES;ITGA5;ITGB1;LOC102272596	Reticulum	G20d_G0d_down
bom04935	Growth hormone synthesis, secretion and action	Organismal Systems	Endocrine system	6	0.0013788	4.89698	CACNA1C;CREB3L1;CREB3L2;IGF1;SOCS3;STAT3	Reticulum	G20d_G0d_down
bom04810	Regulation of actin cytoskeleton	Cellular Processes	Cell motility	8	0.00231849	3.41441	ACTN1;ENAH;FGFR1;ITGA5;ITGB1;MSN;MYH10;RRAS2	Reticulum	G20d_G0d_down
bom04060	Cytokine-cytokine receptor interaction	Environmental Information Processing	Signaling molecules and interaction	9	0.00441263	2.829	CLCF1;IL17B;IL27RA;IL6;OSMR;RELT;TGFB2;TNFRSF12A;TNFRSF6B	Reticulum	G20d_G0d_down
bom04927	Cortisol synthesis and secretion	Organismal Systems	Endocrine system	4	0.00542499	5.63894	CACNA1C;CREB3L1;CREB3L2;LOC102282116	Reticulum	G20d_G0d_down
bom04933	AGE-RAGE signaling pathway in diabetic complications	Human Diseases	Endocrine and metabolic disease	5	0.00556212	4.3888	F3;IL6;STAT3;TGFB2;VEGFA	Reticulum	G20d_G0d_down
bom04145	Phagosome	Cellular Processes	Transport and catabolism	6	0.00830889	3.404	ATP6V0A4;COLEC11;ITGA5;ITGB1;THBS1;TUBB6	Reticulum	G20d_G0d_down
bom05145	Toxoplasmosis	Human Diseases	Infectious disease: parasitic	5	0.00838793	3.97618	HSPA6;ITGB1;LAMC1;STAT3;TGFB2	Reticulum	G20d_G0d_down
bom05212	Pancreatic cancer	Human Diseases	Cancer: specific types	4	0.00931635	4.83338	GADD45G;STAT3;TGFB2;VEGFA	Reticulum	G20d_G0d_down
bom01521	EGFR tyrosine kinase inhibitor resistance	Human Diseases	Drug resistance: antineoplastic	4	0.0106267	4.65213	IGF1;IL6;STAT3;VEGFA	Reticulum	G20d_G0d_down
bom00071	Fatty acid degradation	Metabolism	Lipid metabolism	3	0.0115838	6.34381	ACSL4;LOC102268504;LOC102270081	Reticulum	G20d_G0d_down
bom04640	Hematopoietic cell lineage	Organismal Systems	Immune system	28	7.78556e-13	4.90817	CD14;CD1E;CD2;CD22;CD37;CD3D;CD3E;CD3G;CD4;CD5;CD8A;CD8B;CR2;CSF1R;FCER2;FLT3;IL1A;IL1R2;ITGA4;LOC102269342;LOC102271117;LOC102271676;LOC102282998;LOC102283173;LOC102283463;LOC102285144;LOC102288394;TNF	Reticulum	G60d_G0d_up
bom05340	Primary immunodeficiency	Human Diseases	Immune disease	15	4.55344e-10	7.17748	BLNK;CD3D;CD3E;CD4;CD40LG;CD79A;CD8A;CD8B;CIITA;ICOS;LOC102280800;LOC102283173;PTPRC;TAP1;ZAP70	Reticulum	G60d_G0d_up
bom00280	Valine, leucine and isoleucine degradation	Metabolism	Amino acid metabolism	17	2.24059e-09	5.67879	ACAA2;ACADS;ACADSB;ACSF3;ALDH6A1;BCKDHA;BCKDHB;ECHS1;HADH;HMGCL;HMGCS2;IVD;MCCC1;MCEE;MUT;PCCA;PCCB	Reticulum	G60d_G0d_up
bom04612	Antigen processing and presentation	Organismal Systems	Immune system	21	2.20477e-08	4.08564	B2M;CD4;CD74;CD8A;CD8B;CIITA;CTSS;HSPA2;IFI30;LOC102268170;LOC102269342;LOC102270654;LOC102271117;LOC102271676;LOC102275624;LOC102281193;LOC102282998;LOC102283463;LOC102285144;TAP1;TNF	Reticulum	G60d_G0d_up
bom00983	Drug metabolism - other enzymes	Metabolism	Xenobiotics biodegradation and metabolism	18	4.77762e-08	4.48845	CDA;CES2;CMPK1;LOC102264665;LOC102264698;LOC102270291;LOC102270864;LOC102272205;LOC102274807;LOC102275700;LOC102275834;LOC102276661;LOC102281969;LOC102282831;MGST3;TPMT;UGT2A1;UPP1	Reticulum	G60d_G0d_up
bom04061	Viral protein interaction with cytokine and cytokine receptor	Environmental Information Processing	Signaling molecules and interaction	19	1.78642e-07	3.95747	CCL22;CCL24;CCL5;CCR4;CCR7;CSF1R;CX3CR1;CXCL10;CXCL9;CXCR4;IL20RA;IL20RB;IL22RA1;LOC102272762;LOC102284639;LOC102288304;TNF;TNFSF10;XCR1	Reticulum	G60d_G0d_up
bom00980	Metabolism of xenobiotics by cytochrome P450	Metabolism	Xenobiotics biodegradation and metabolism	16	2.05192e-07	4.56889	GSTK1;LOC102264665;LOC102264698;LOC102265481;LOC102267279;LOC102270291;LOC102270864;LOC102272205;LOC102274807;LOC102276661;LOC102279872;LOC102281969;LOC102282831;LOC102284246;MGST3;UGT2A1	Reticulum	G60d_G0d_up
bom04514	Cell adhesion molecules	Environmental Information Processing	Signaling molecules and interaction	27	2.51427e-07	2.98763	CD2;CD22;CD4;CD40LG;CD6;CD8A;CD8B;CLDN17;CLDN4;ICOS;ITGA4;ITGAL;ITGB2;LOC102268170;LOC102269342;LOC102270654;LOC102271117;LOC102271676;LOC102275624;LOC102281193;LOC102282998;LOC102283463;LOC102285144;PTPRC;SELPLG;SIGLEC1;SPN	Reticulum	G60d_G0d_up
bom04145	Phagosome	Cellular Processes	Transport and catabolism	27	4.20474e-07	2.91476	ATP6V0A1;ATP6V0B;ATP6V1B1;ATP6V1C2;CD14;CTSS;ITGB2;LOC102268170;LOC102268800;LOC102269342;LOC102270654;LOC102271117;LOC102271676;LOC102273069;LOC102273538;LOC102274112;LOC102275624;LOC102276844;LOC102281193;LOC102282998;LOC102283173;LOC102283463;LOC102285144;LOC102288244;MARCO;TAP1;THBS4	Reticulum	G60d_G0d_up
bom04142	Lysosome	Cellular Processes	Transport and catabolism	24	4.3902e-07	3.14746	ACP5;ARSA;ATP6V0A1;ATP6V0B;CTSA;CTSD;CTSF;CTSH;CTSS;CTSW;CTSZ;GBA;GNS;LAMP3;LAPTM5;LIPA;LOC102275834;MAN2B1;MANBA;NAPSA;PSAP;SMPD1;SORT1;TPP1	Reticulum	G60d_G0d_up
bom04060	Cytokine-cytokine receptor interaction	Environmental Information Processing	Signaling molecules and interaction	39	5.4506e-07	2.33268	BMP2;CCL22;CCL24;CCL5;CCR4;CCR7;CD27;CD4;CD40LG;CSF1R;CX3CR1;CXCL10;CXCL9;CXCR4;CXCR6;IL12RB1;IL12RB2;IL17F;IL17RB;IL1A;IL1R2;IL1RL2;IL1RN;IL20RA;IL20RB;IL21R;IL22RA1;IL32;IL36G;IL36RN;LOC102272762;LOC102284639;LOC102284826;LOC102288248;LOC102288304;PRLR;TNF;TNFSF10;XCR1	Reticulum	G60d_G0d_up
bom05169	Epstein-Barr virus infection	Human Diseases	Infectious disease: viral	32	7.30441e-07	2.56354	B2M;BLNK;CASP3;CD3D;CD3E;CD3G;CR2;CXCL10;DDX58;FCER2;ISG15;ITGAL;LOC102268170;LOC102269342;LOC102270654;LOC102271117;LOC102271676;LOC102272934;LOC102275624;LOC102281193;LOC102282998;LOC102283173;LOC102283231;LOC102283463;LOC102283513;LOC102285144;MAPK13;OAS2;PIK3CB;PLCG2;TAP1;TNF	Reticulum	G60d_G0d_up
bom00040	Pentose and glucuronate interconversions	Metabolism	Carbohydrate metabolism	10	1.06491e-06	6.5572	AKR1A1;CRYL1;LOC102264665;LOC102270291;LOC102270864;LOC102275834;LOC102282831;SORD;UGDH;UGT2A1	Reticulum	G60d_G0d_up
bom05416	Viral myocarditis	Human Diseases	Cardiovascular disease	17	1.40589e-06	3.80982	CASP3;CD40LG;CXADR;ITGAL;ITGB2;LOC102268170;LOC102269342;LOC102270654;LOC102271117;LOC102271676;LOC102275624;LOC102281193;LOC102282998;LOC102283173;LOC102283463;LOC102285144;PRF1	Reticulum	G60d_G0d_up
bom05330	Allograft rejection	Human Diseases	Immune disease	14	1.42777e-06	4.50659	CD40LG;LOC102268170;LOC102269342;LOC102270654;LOC102271117;LOC102271676;LOC102275624;LOC102281193;LOC102282998;LOC102283173;LOC102283463;LOC102285144;PRF1;TNF	Reticulum	G60d_G0d_up
bom00982	Drug metabolism - cytochrome P450	Metabolism	Xenobiotics biodegradation and metabolism	14	2.84355e-06	4.27349	FMO5;GSTK1;LOC102264665;LOC102264698;LOC102270291;LOC102270864;LOC102272205;LOC102274807;LOC102276661;LOC102281969;LOC102282831;LOC102284246;MGST3;UGT2A1	Reticulum	G60d_G0d_up
bom05204	Chemical carcinogenesis - DNA adducts	Human Diseases	Cancer: overview	14	4.38033e-06	4.13104	GSTK1;LOC102264665;LOC102264698;LOC102270291;LOC102270864;LOC102272205;LOC102274807;LOC102275700;LOC102276661;LOC102281969;LOC102282831;LOC102284686;MGST3;UGT2A1	Reticulum	G60d_G0d_up
bom05150	Staphylococcus aureus infection	Human Diseases	Infectious disease: bacterial	19	4.62329e-06	3.23447	C3AR1;ITGAL;ITGB2;KRT23;KRT24;KRT9;LOC102268264;LOC102268548;LOC102269342;LOC102271117;LOC102271676;LOC102273069;LOC102273538;LOC102274112;LOC102282998;LOC102283173;LOC102283463;LOC102285144;SELPLG	Reticulum	G60d_G0d_up
bom05140	Leishmaniasis	Human Diseases	Infectious disease: parasitic	16	4.66353e-06	3.67885	IL1A;ITGA4;ITGB2;LOC102269342;LOC102271117;LOC102271676;LOC102273538;LOC102274112;LOC102282998;LOC102283173;LOC102283463;LOC102285144;LOC102288244;MAPK13;NOS2;TNF	Reticulum	G60d_G0d_up
bom00920	Sulfur metabolism	Metabolism	Energy metabolism	6	5.44708e-06	10.6227	BPNT1;ETHE1;PAPSS2;SELENBP1;SUOX;TST	Reticulum	G60d_G0d_up
bom00330	Arginine and proline metabolism	Metabolism	Amino acid metabolism	7	0.000452722	4.98875	MAOB;NOS1;OAT;ODC1;PRODH;PYCR1;SRM	Reticulum	G60d_G0d_down
bom05205	Proteoglycans in cancer	Human Diseases	Cancer: overview	14	0.00122724	2.54329	CAV1;CAV2;FGFR1;FLNC;IGF1;IGF2;ITGA5;ITGB1;MSN;RRAS2;STAT3;WNT11;WNT16;WNT2B	Reticulum	G60d_G0d_down
bom04514	Cell adhesion molecules	Environmental Information Processing	Signaling molecules and interaction	11	0.0039702	2.54783	CDH3;CLDN10;ICAM3;IGSF11;ITGB1;LOC102271416;LOC102284715;MPZ;NRCAM;SELP;VTCN1	Reticulum	G60d_G0d_down
bom00982	Drug metabolism - cytochrome P450	Metabolism	Xenobiotics biodegradation and metabolism	6	0.00454043	3.83372	FMO1;FMO2;FMO3;LOC102281032;LOC102287938;MAOB	Reticulum	G60d_G0d_down
bom05143	African trypanosomiasis	Human Diseases	Infectious disease: parasitic	5	0.00465191	4.51943	APOA1;IL6;KNG1;LOC102267004;LOC102271416	Reticulum	G60d_G0d_down
bom05144	Malaria	Human Diseases	Infectious disease: parasitic	6	0.00537133	3.70593	ACKR1;IL6;LOC102267004;LOC102271416;LOC102271913;SELP	Reticulum	G60d_G0d_down
bom04657	IL-17 signaling pathway	Organismal Systems	Immune system	7	0.00892858	2.98178	IL17B;IL17C;IL6;LOC102269246;LOC102271402;LOC102271913;MAPK4	Reticulum	G60d_G0d_down
bom04060	Cytokine-cytokine receptor interaction	Environmental Information Processing	Signaling molecules and interaction	15	0.0140973	1.87801	CLCF1;CXCR1;CXCR2;IL17B;IL17C;IL1RL1;IL27RA;IL6;LOC102269246;LOC102271913;NGFR;OSMR;RELT;TNFRSF12A;TNFRSF6B	Reticulum	G60d_G0d_down
bom05224	Breast cancer	Human Diseases	Cancer: specific types	9	0.0193758	2.23848	E2F3;FGF18;FGFR1;GADD45G;IGF1;SHC2;WNT11;WNT16;WNT2B	Reticulum	G60d_G0d_down
bom04721	Synaptic vesicle cycle	Organismal Systems	Nervous system	6	0.0195792	2.81463	ATP6V0A4;CACNA1B;CPLX2;SLC1A1;SLC1A7;SLC6A13	Reticulum	G60d_G0d_down
bom04713	Circadian entrainment	Organismal Systems	Environmental adaptation	7	0.0232138	2.47062	ADCYAP1;ADCYAP1R1;GNG10;GNG3;GRIA2;NOS1;PRKG1	Reticulum	G60d_G0d_down
bom04933	AGE-RAGE signaling pathway in diabetic complications	Human Diseases	Endocrine and metabolic disease	7	0.0243057	2.44731	F3;IL6;LOC102271416;LOC102271913;SERPINE1;STAT3;THBD	Reticulum	G60d_G0d_down
bom04010	MAPK signaling pathway	Environmental Information Processing	Signal transduction	14	0.0265847	1.77682	AREG;CACNA1B;DUSP10;EREG;FGF18;FGFR1;FLNC;GADD45G;IGF1;IGF2;MAPK8IP2;NGFR;RELB;RRAS2	Reticulum	G60d_G0d_down
bom05217	Basal cell carcinoma	Human Diseases	Cancer: specific types	5	0.0271195	2.94122	GADD45G;GLI1;WNT11;WNT16;WNT2B	Reticulum	G60d_G0d_down
bom04931	Insulin resistance	Human Diseases	Endocrine and metabolic disease	7	0.0277923	2.37996	CREB3L1;GFPT2;IL6;PPP1R3C;SOCS3;STAT3;TRIB3	Reticulum	G60d_G0d_down
bom04024	cAMP signaling pathway	Environmental Information Processing	Signal transduction	12	0.0283653	1.86072	ADCYAP1;ADCYAP1R1;ATP1B1;CFTR;CREB3L1;GLI1;GRIA2;HTR4;NPY;PTGER3;RRAS2;VIP	Reticulum	G60d_G0d_down
bom04668	TNF signaling pathway	Environmental Information Processing	Signal transduction	7	0.0329491	2.29571	CREB3L1;IL6;IRF1;LOC102269246;LOC102271416;LOC102271913;SOCS3	Reticulum	G60d_G0d_down
bom04724	Glutamatergic synapse	Organismal Systems	Nervous system	7	0.0329491	2.29571	GNG10;GNG3;GRIA2;GRIK3;SLC1A1;SLC1A7;SLC38A1	Reticulum	G60d_G0d_down
bom04810	Regulation of actin cytoskeleton	Cellular Processes	Cell motility	11	0.0339247	1.86997	ENAH;FGF18;FGFR1;ITGA5;ITGA7;ITGB1;KNG1;MSN;MYH10;RRAS2;SCIN	Reticulum	G60d_G0d_down
bom04727	GABAergic synapse	Organismal Systems	Nervous system	6	0.0360814	2.44347	CACNA1B;GNG10;GNG3;SLC38A1;SLC38A5;SLC6A13	Reticulum	G60d_G0d_down
bom00190	Oxidative phosphorylation	Metabolism	Energy metabolism	44	6.13443e-14	3.45903	ATP5A1;ATP5B;ATP5G3;ATP5I;ATP5J;ATP5J2;ATP6V0A1;ATP6V0B;ATP6V0C;ATP6V1A;ATP6V1B1;LOC102266923;LOC102270480;LOC102270524;LOC102271679;LOC102272636;LOC102273579;LOC102274326;LOC102277620;LOC102278351;LOC102279149;LOC102281629;LOC102283287;LOC102284305;LOC102286844;LOC102287792;NDUFA10;NDUFA11;NDUFA12;NDUFA13;NDUFA8;NDUFA9;NDUFAB1;NDUFB3;NDUFS1;NDUFS2;NDUFS6;NDUFS7;NDUFS8;NDUFV1;SDHA;SDHB;SDHC;SDHD	Reticulum	G15m_G0d_up
bom04640	Hematopoietic cell lineage	Organismal Systems	Immune system	35	2.43284e-13	3.97742	CD14;CD1E;CD2;CD22;CD37;CD3D;CD3E;CD3G;CD4;CD5;CD8A;CD8B;CD9;CR2;CSF1R;EPOR;FCER2;FLT3;IL1A;IL1B;IL1R2;IL2RA;IL7;IL7R;ITGAM;LOC102269342;LOC102271117;LOC102271676;LOC102282432;LOC102282998;LOC102283173;LOC102283463;LOC102285144;LOC102288394;TNF	Reticulum	G15m_G0d_up
bom04142	Lysosome	Cellular Processes	Transport and catabolism	39	7.38738e-12	3.31578	ACP5;AP3B2;ARSA;ATP6V0A1;ATP6V0B;ATP6V0C;CD68;CLN3;CLTB;CTNS;CTSA;CTSD;CTSH;CTSS;CTSW;CTSZ;DNASE2;GBA;GNS;GUSB;HEXA;HEXB;HYAL1;LAMP3;LAPTM5;LGMN;LIPA;LOC102275834;MAN2B1;MANBA;MCOLN1;NAPSA;NPC1;NPC2;PPT2;PSAP;SMPD1;SORT1;TPP1	Reticulum	G15m_G0d_up
bom04061	Viral protein interaction with cytokine and cytokine receptor	Environmental Information Processing	Signaling molecules and interaction	29	4.36034e-11	3.91592	CCL22;CCL5;CCR4;CCR7;CCR8;CSF1R;CX3CR1;CXCL10;CXCL13;CXCL8;CXCL9;CXCR4;IL10RB;IL20RA;IL20RB;IL22RA1;IL2RA;IL2RG;LOC102264498;LOC102272762;LOC102284639;LOC102287335;LOC102287450;LOC102287625;LOC102288304;TNF;TNFSF10;TNFSF14;XCR1	Reticulum	G15m_G0d_up
bom04932	Non-alcoholic fatty liver disease	Human Diseases	Endocrine and metabolic disease	43	5.08203e-11	2.93774	CASP3;CXCL8;FASLG;IL1A;IL1B;LOC102266923;LOC102270480;LOC102270524;LOC102271679;LOC102272636;LOC102273579;LOC102274326;LOC102277620;LOC102278351;LOC102279149;LOC102281629;LOC102283287;LOC102286844;LOC102287792;MAPK13;MLXIPL;NDUFA10;NDUFA11;NDUFA12;NDUFA13;NDUFA8;NDUFA9;NDUFAB1;NDUFB3;NDUFS1;NDUFS2;NDUFS6;NDUFS7;NDUFS8;NDUFV1;PIK3CB;PIK3CD;PPARG;SDHA;SDHB;SDHC;SDHD;TNF	Reticulum	G15m_G0d_up
bom05415	Diabetic cardiomyopathy	Human Diseases	Cardiovascular disease	49	9.74157e-11	2.66544	ATP5A1;ATP5B;ATP5G3;ATP5J;CPT2;CTSD;GSR;LOC102266923;LOC102270480;LOC102270524;LOC102271679;LOC102272636;LOC102273579;LOC102274326;LOC102278351;LOC102279149;LOC102281629;LOC102283287;LOC102286844;LOC102287792;LOC102288244;MAPK13;MMP9;NCF1;NDUFA10;NDUFA11;NDUFA12;NDUFA13;NDUFA8;NDUFA9;NDUFAB1;NDUFB3;NDUFS1;NDUFS2;NDUFS6;NDUFS7;NDUFS8;NDUFV1;PDHA1;PDK3;PIK3CB;PIK3CD;PLCB2;PPIF;SDHA;SDHB;SDHC;SDHD;V…	Reticulum	G15m_G0d_up
bom05340	Primary immunodeficiency	Human Diseases	Immune disease	17	2.42114e-09	5.27353	BLNK;CD3D;CD3E;CD4;CD40LG;CD79A;CD8A;CD8B;CIITA;ICOS;IL2RG;IL7R;LOC102280800;LOC102283173;PTPRC;TAP1;ZAP70	Reticulum	G15m_G0d_up
bom00980	Metabolism of xenobiotics by cytochrome P450	Metabolism	Xenobiotics biodegradation and metabolism	22	4.26133e-09	4.07273	ADH5;EPHX1;GSTK1;GSTM3;LOC102264665;LOC102264698;LOC102265481;LOC102267279;LOC102269158;LOC102270291;LOC102270864;LOC102272205;LOC102276661;LOC102279872;LOC102280721;LOC102281969;LOC102282379;LOC102282831;LOC102284246;LOC102288314;MGST3;UGT2A1	Reticulum	G15m_G0d_up
bom04060	Cytokine-cytokine receptor interaction	Environmental Information Processing	Signaling molecules and interaction	57	5.9382e-09	2.21023	BMP2;CCL22;CCL5;CCR4;CCR7;CCR8;CD27;CD4;CD40LG;CSF1R;CX3CR1;CXCL10;CXCL13;CXCL8;CXCL9;CXCR4;CXCR6;EDA2R;EPOR;FASLG;IFNLR1;IL10RB;IL12RB1;IL12RB2;IL17A;IL17RB;IL1A;IL1B;IL1R2;IL1RL2;IL1RN;IL20RA;IL20RB;IL21R;IL22RA1;IL2RA;IL2RG;IL32;IL36G;IL36RN;IL7;IL7R;LOC102264498;LOC102272762;LOC102284639;LOC102284826;LOC102287335;LOC102287450;LOC102287625;LOC102288248;LOC102288304;PRLR;TNF;TNFSF10;TNFSF13B;TN…	Reticulum	G15m_G0d_up
bom00983	Drug metabolism - other enzymes	Metabolism	Xenobiotics biodegradation and metabolism	23	1.41616e-08	3.71813	CDA;CES2;CMPK1;GSTM3;GUSB;LOC102264665;LOC102264698;LOC102269158;LOC102270291;LOC102270864;LOC102272205;LOC102275700;LOC102275834;LOC102276661;LOC102281969;LOC102282379;LOC102282831;LOC102287153;LOC102288314;MGST3;TPMT;UGT2A1;UPP1	Reticulum	G15m_G0d_up
bom00640	Propanoate metabolism	Metabolism	Carbohydrate metabolism	15	2.57561e-08	5.21713	ACADS;ACAT1;ACSS2;BCKDHA;BCKDHB;DLD;ECHDC1;ECHS1;HIBCH;LOC102274962;MCEE;MUT;PCCA;PCCB;SUCLG2	Reticulum	G15m_G0d_up
bom04714	Thermogenesis	Organismal Systems	Environmental adaptation	48	3.75738e-08	2.27657	ACSL6;AKT1S1;ATP5A1;ATP5B;ATP5G3;ATP5I;ATP5J;ATP5J2;CPT2;DPF3;FGF21;LOC102266923;LOC102270480;LOC102270524;LOC102271679;LOC102272636;LOC102273579;LOC102274326;LOC102275047;LOC102278351;LOC102279149;LOC102281629;LOC102283287;LOC102284305;LOC102286844;LOC102287792;MAPK13;NDUFA10;NDUFA11;NDUFA12;NDUFA13;NDUFA8;NDUFA9;NDUFAB1;NDUFAF7;NDUFB3;NDUFS1;NDUFS2;NDUFS6;NDUFS7;NDUFS8;NDUFV1;PPARG;SDHA;SDHB;SD…	Reticulum	G15m_G0d_up
bom00280	Valine, leucine and isoleucine degradation	Metabolism	Amino acid metabolism	19	4.03783e-08	4.11464	ACAA2;ACADS;ACADSB;ACAT1;ACSF3;BCKDHA;BCKDHB;DLD;ECHS1;HADH;HIBCH;HMGCL;HMGCS2;IVD;MCCC1;MCEE;MUT;PCCA;PCCB	Reticulum	G15m_G0d_up
bom05323	Rheumatoid arthritis	Human Diseases	Immune disease	28	4.77451e-08	3.06072	ACP5;ATP6V0A1;ATP6V0B;ATP6V0C;ATP6V1A;ATP6V1B1;CCL5;CD28;CXCL8;IL17A;IL1A;IL1B;ITGAL;ITGB2;LOC102269342;LOC102271117;LOC102271676;LOC102272762;LOC102282432;LOC102282998;LOC102283173;LOC102283463;LOC102285144;LOC102287625;LOC102288330;TLR4;TNF;TNFSF13B	Reticulum	G15m_G0d_up
bom05020	Prion disease	Human Diseases	Neurodegenerative disease	52	5.30402e-08	2.17033	ATP5A1;ATP5B;ATP5G3;ATP5J;C1QA;C1QB;C1QC;CASP3;CCL5;HSPA2;IL1A;IL1B;LOC102266923;LOC102270480;LOC102270524;LOC102271679;LOC102272636;LOC102273579;LOC102274326;LOC102277620;LOC102278351;LOC102279149;LOC102281629;LOC102283287;LOC102286844;LOC102287792;LOC102288244;MAPK13;NCF1;NDUFA10;NDUFA11;NDUFA12;NDUFA13;NDUFA8;NDUFA9;NDUFAB1;NDUFB3;NDUFS1;NDUFS2;NDUFS6;NDUFS7;NDUFS8;NDUFV1;PIK3CB;PIK3CD;PPIF;SD…	Reticulum	G15m_G0d_up
bom05204	Chemical carcinogenesis - DNA adducts	Human Diseases	Cancer: overview	20	7.27499e-08	3.8259	EPHX1;GSTK1;GSTM3;LOC102264665;LOC102264698;LOC102269158;LOC102270291;LOC102270864;LOC102272205;LOC102275700;LOC102276661;LOC102280721;LOC102281969;LOC102282379;LOC102282831;LOC102284405;LOC102284686;LOC102288314;MGST3;UGT2A1	Reticulum	G15m_G0d_up
bom00040	Pentose and glucuronate interconversions	Metabolism	Carbohydrate metabolism	13	9.54961e-08	5.5263	AKR1A1;CRYL1;GUSB;LOC102264665;LOC102269158;LOC102270291;LOC102270864;LOC102275834;LOC102282379;LOC102282831;SORD;UGDH;UGT2A1	Reticulum	G15m_G0d_up
bom00020	Citrate cycle (TCA cycle)	Metabolism	Carbohydrate metabolism	14	1.37452e-07	5.02149	ACO1;DLAT;DLD;DLST;IDH1;IDH3B;MDH2;OGDH;PDHA1;SDHA;SDHB;SDHC;SDHD;SUCLG2	Reticulum	G15m_G0d_up
bom05150	Staphylococcus aureus infection	Human Diseases	Infectious disease: bacterial	27	1.51452e-07	2.97978	C1QA;C1QB;C1QC;C2;C3;C3AR1;CFD;ITGAL;ITGAM;ITGB2;KRT24;KRT9;LOC102268264;LOC102268548;LOC102269342;LOC102271117;LOC102271676;LOC102273069;LOC102273538;LOC102274112;LOC102281124;LOC102282432;LOC102282998;LOC102283173;LOC102283463;LOC102285144;SELPLG	Reticulum	G15m_G0d_up
bom00140	Steroid hormone biosynthesis	Metabolism	Lipid metabolism	21	3.46531e-07	3.39481	DHRS11;HSD17B12;HSD17B2;LOC102264665;LOC102267155;LOC102269158;LOC102269337;LOC102270291;LOC102270864;LOC102271037;LOC102271453;LOC102272308;LOC102272594;LOC102282379;LOC102282831;LOC102283454;LOC102284205;LOC102284405;LOC102284686;SRD5A1;UGT2A1	Reticulum	G15m_G0d_up
bom04512	ECM-receptor interaction	Environmental Information Processing	Signaling molecules and interaction	29	3.91166e-15	5.68826	COL1A1;COL1A2;COL2A1;COL4A1;COL4A2;COL4A5;COL4A6;COL6A1;COL6A6;COL9A1;FN1;FRAS1;FREM2;ITGA10;ITGA5;ITGA7;ITGA8;ITGB1;LAMA2;LAMA4;LAMB1;LAMC1;LOC102268113;NPNT;SPP1;SV2B;SV2C;THBS1;TNR	Reticulum	G15m_G0d_down
bom04974	Protein digestion and absorption	Organismal Systems	Digestive system	29	4.66195e-10	3.72247	ACE2;ATP1A3;ATP1B1;COL11A1;COL12A1;COL13A1;COL14A1;COL16A1;COL1A1;COL1A2;COL21A1;COL28A1;COL2A1;COL3A1;COL4A1;COL4A2;COL4A5;COL4A6;COL5A1;COL5A2;COL5A3;COL6A1;COL6A6;COL7A1;COL9A1;LOC102268113;LOC106701596;SLC16A10;SLC1A1	Reticulum	G15m_G0d_down
bom04510	Focal adhesion	Cellular Processes	Cellular community - eukaryotes	35	3.24773e-09	3.00984	CAPN2;CAV1;CAV2;CAV3;COL1A1;COL1A2;COL2A1;COL4A1;COL4A2;COL4A5;COL4A6;COL6A1;COL6A6;COL9A1;FLNC;FN1;IGF1;ITGA10;ITGA5;ITGA7;ITGA8;ITGB1;LAMA2;LAMA4;LAMB1;LAMC1;LOC102268113;LOC102269967;LOC102277897;PPP1R12A;SHC2;SHC4;SPP1;THBS1;TNR	Reticulum	G15m_G0d_down
bom04360	Axon guidance	Organismal Systems	Development and regeneration	29	5.44881e-07	2.75139	BOC;CAMK2A;DCC;EFNB3;ENAH;EPHA4;EPHA7;EPHB2;ITGB1;L1CAM;LOC102279308;LOC102279399;LRRC4C;NFATC2;PLXNA4;PTCH1;RGMA;SEMA3A;SEMA3C;SEMA3F;SEMA4F;SEMA6A;SEMA6D;SMO;SRGAP1;SSH2;TRPC1;UNC5C;UNC5D	Reticulum	G15m_G0d_down
bom04514	Cell adhesion molecules	Environmental Information Processing	Signaling molecules and interaction	26	1.16726e-06	2.83678	ALCAM;CD276;CDH2;CDH3;CLDN10;CNTN2;CNTNAP1;IGSF11;ITGA8;ITGB1;L1CAM;LOC102269592;LRRC4B;LRRC4C;MPZ;NCAM1;NCAM2;NEGR1;NLGN1;NRCAM;NRXN1;PDCD1;PVRL3;SELP;VCAN;VTCN1	Reticulum	G15m_G0d_down
bom04024	cAMP signaling pathway	Environmental Information Processing	Signal transduction	32	5.56176e-06	2.33735	ADCY2;ADCY3;ADCYAP1;ADCYAP1R1;ATP1A3;ATP1B1;CACNA1C;CAMK2A;CFTR;CHRM2;CNGA3;CREB3L1;CREB3L2;CREB5;CRHR2;GRIA2;GRIA3;HTR4;LOC102269967;LOC102275331;LOC102286123;NPY;PDE10A;PDE3A;PLCE1;POMC;PPP1R12A;PTCH1;PTGER3;RRAS2;SST;TSHR	Reticulum	G15m_G0d_down
bom05414	Dilated cardiomyopathy	Human Diseases	Cardiovascular disease	18	7.95561e-06	3.23946	ACTC1;ADCY2;ADCY3;AGT;CACNA1C;CACNA2D1;CACNG5;IGF1;ITGA10;ITGA5;ITGA7;ITGA8;ITGB1;LAMA2;LOC102286123;SGCD;TGFB2;TGFB3	Reticulum	G15m_G0d_down
bom05410	Hypertrophic cardiomyopathy	Human Diseases	Cardiovascular disease	17	1.29294e-05	3.26121	ACTC1;AGT;CACNA1C;CACNA2D1;CACNG5;IGF1;IL6;ITGA10;ITGA5;ITGA7;ITGA8;ITGB1;LAMA2;PRKAG2;SGCD;TGFB2;TGFB3	Reticulum	G15m_G0d_down
bom04151	PI3K-Akt signaling pathway	Environmental Information Processing	Signal transduction	42	1.52569e-05	1.97627	ANGPT4;CHRM2;COL1A1;COL1A2;COL2A1;COL4A1;COL4A2;COL4A5;COL4A6;COL6A1;COL6A6;COL9A1;CREB3L1;CREB3L2;CREB5;FGF18;FGF7;FGFR1;FGFR4;FN1;GNG2;IGF1;IGF2;IL6;ITGA10;ITGA5;ITGA7;ITGA8;ITGB1;KITLG;LAMA2;LAMA4;LAMB1;LAMC1;LOC102268113;LPAR4;NGFR;NTRK2;PHLPP2;SPP1;THBS1;TNR	Reticulum	G15m_G0d_down
bom05146	Amoebiasis	Human Diseases	Infectious disease: parasitic	18	1.88722e-05	3.05075	ARG1;COL1A1;COL1A2;COL3A1;COL4A1;COL4A2;COL4A5;COL4A6;FN1;IL6;LAMA2;LAMA4;LAMB1;LAMC1;LOC102277897;LOC102286123;TGFB2;TGFB3	Reticulum	G15m_G0d_down
bom04080	Neuroactive ligand-receptor interaction	Environmental Information Processing	Signaling molecules and interaction	39	3.65074e-05	1.96204	ADCYAP1;ADCYAP1R1;ADRA1D;ADRA2A;AGT;C5;CALCRL;CHRM2;CHRNA3;CRHR2;EDNRB;GABRB3;GABRE;GABRG2;GRIA2;GRIA3;GRID2;GRIK3;GRIK4;HCRTR1;HRH1;HRH2;HTR4;LPAR4;MCHR1;NMB;NPY;PENK;POMC;PTGER3;PTGFR;S1PR1;S1PR3;SLURP1;SST;TAC1;TACR2;TACR3;TSHR	Reticulum	G15m_G0d_down
bom05205	Proteoglycans in cancer	Human Diseases	Cancer: overview	27	3.70991e-05	2.3105	CAMK2A;CAV1;CAV2;CAV3;COL1A1;COL1A2;FGFR1;FLNC;FN1;GPC3;IGF1;IGF2;ITGA5;ITGB1;MSN;PDCD4;PLCE1;PPP1R12A;PTCH1;RRAS2;SMO;TGFB2;THBS1;WNT10A;WNT11;WNT2B;WNT7A	Reticulum	G15m_G0d_down
bom04927	Cortisol synthesis and secretion	Organismal Systems	Endocrine system	13	7.60623e-05	3.43852	ADCY2;ADCY3;AGT;CACNA1C;CACNA1G;CREB3L1;CREB3L2;CREB5;KCNK2;LOC102282116;LOC102286123;NCEH1;POMC	Reticulum	G15m_G0d_down
bom04020	Calcium signaling pathway	Environmental Information Processing	Signal transduction	30	0.000104092	2.07822	ADCY2;ADCY3;ADRA1D;CACNA1B;CACNA1C;CACNA1G;CAMK1D;CAMK2A;CHRM2;EDNRB;FGF18;FGF7;FGFR1;FGFR4;HRC;HRH1;HRH2;HTR4;LOC102286123;NOS1;NTRK2;NTRK3;PHKA2;PLCE1;PTGER3;PTGFR;RET;TACR2;TACR3;TPCN1	Reticulum	G15m_G0d_down
bom05165	Human papillomavirus infection	Human Diseases	Infectious disease: viral	37	0.00010763	1.90535	ATP6V0A4;COL1A1;COL1A2;COL2A1;COL4A1;COL4A2;COL4A5;COL4A6;COL6A1;COL6A6;COL9A1;CREB3L1;CREB3L2;CREB5;FN1;HES4;HEY1;HEYL;ITGA10;ITGA5;ITGA7;ITGA8;ITGB1;LAMA2;LAMA4;LAMB1;LAMC1;LOC102268113;LOC102286123;NOTCH2;SPP1;THBS1;TNR;WNT10A;WNT11;WNT2B;WNT7A	Reticulum	G15m_G0d_down
bom05200	Pathways in cancer	Human Diseases	Cancer: overview	52	0.000129784	1.68105	ADCY2;ADCY3;AGT;ALK;APAF1;CAMK2A;COL4A1;COL4A2;COL4A5;COL4A6;DCC;E2F3;EDNRB;FGF18;FGF7;FGFR1;FGFR4;FN1;GADD45G;GLI2;GNG2;HEY1;HEYL;IGF1;IGF2;IL6;ITGB1;KITLG;LAMA2;LAMA4;LAMB1;LAMC1;LOC102277774;LOC102286123;LOC102287938;LPAR4;LRP6;NOTCH2;PTCH1;PTGER3;RARB;RET;RUNX1;SMAD3;SMO;SUFU;TGFB2;TGFB3;WNT10A;WNT11;WNT2B;WNT7A	Reticulum	G15m_G0d_down
bom04926	Relaxin signaling pathway	Organismal Systems	Endocrine system	19	0.000157096	2.53194	ACTA2;ADCY2;ADCY3;COL1A1;COL1A2;COL3A1;COL4A1;COL4A2;COL4A5;COL4A6;CREB3L1;CREB3L2;CREB5;EDNRB;GNG2;LOC102286123;NOS1;SHC2;SHC4	Reticulum	G15m_G0d_down
bom04925	Aldosterone synthesis and secretion	Organismal Systems	Endocrine system	16	0.000161879	2.79313	ADCY2;ADCY3;AGT;ATP1A3;ATP1B1;CACNA1C;CACNA1G;CAMK1D;CAMK2A;CREB3L1;CREB3L2;CREB5;DAGLA;LOC102282116;LOC102286123;POMC	Reticulum	G15m_G0d_down
bom04340	Hedgehog signaling pathway	Environmental Information Processing	Signal transduction	11	0.00027648	3.42907	ADRBK2;BOC;EVC2;GLI2;GPR161;LOC102271648;LOC102286770;LRP2;PTCH1;SMO;SUFU	Reticulum	G15m_G0d_down
bom04713	Circadian entrainment	Organismal Systems	Environmental adaptation	16	0.000288891	2.66013	ADCY2;ADCY3;ADCYAP1;ADCYAP1R1;CACNA1C;CACNA1G;CAMK2A;GNG2;GRIA2;GRIA3;GUCY1A3;GUCY1B3;LOC102286123;NOS1;PRKG1;PRKG2	Reticulum	G15m_G0d_down
bom04640	Hematopoietic cell lineage	Organismal Systems	Immune system	35	1.9773e-15	4.66276	CD14;CD1E;CD2;CD22;CD37;CD3D;CD3E;CD3G;CD4;CD5;CD8A;CD8B;CD9;CR2;CSF1R;EPOR;FCER2;IL1A;IL1R2;IL2RA;IL7;IL7R;ITGAM;LOC102267156;LOC102269342;LOC102271117;LOC102271676;LOC102282432;LOC102282998;LOC102283173;LOC102283463;LOC102285144;LOC102288394;TFRC;TNF	Reticulum	GAdult_G0d_up
bom00280	Valine, leucine and isoleucine degradation	Metabolism	Amino acid metabolism	21	4.72315e-11	5.33138	ACAA2;ACADS;ACADSB;ACSF3;ALDH2;ALDH6A1;BCKDHA;BCKDHB;DLD;ECHS1;HADH;HIBADH;HIBCH;HMGCL;HMGCS2;IVD;MCCC1;MCEE;MUT;PCCA;PCCB	Reticulum	GAdult_G0d_up
bom05340	Primary immunodeficiency	Human Diseases	Immune disease	17	2.04163e-10	6.1822	BLNK;CD3D;CD3E;CD4;CD40LG;CD79A;CD8A;CD8B;CIITA;ICOS;IL2RG;IL7R;LOC102280800;LOC102283173;PTPRC;TAP1;ZAP70	Reticulum	GAdult_G0d_up
bom00640	Propanoate metabolism	Metabolism	Carbohydrate metabolism	15	2.92293e-09	6.11608	ACADS;ACSS2;ALDH6A1;BCKDHA;BCKDHB;DLD;ECHDC1;ECHS1;HIBCH;LOC102274962;MCEE;MUT;PCCA;PCCB;SUCLG2	Reticulum	GAdult_G0d_up
bom00980	Metabolism of xenobiotics by cytochrome P450	Metabolism	Xenobiotics biodegradation and metabolism	19	5.61819e-08	4.12342	ADH5;EPHX1;GSTK1;LOC102264665;LOC102264698;LOC102265481;LOC102267279;LOC102270291;LOC102270864;LOC102272205;LOC102276661;LOC102279872;LOC102280721;LOC102281969;LOC102282379;LOC102282831;LOC102284246;MGST3;UGT2A1	Reticulum	GAdult_G0d_up
bom00983	Drug metabolism - other enzymes	Metabolism	Xenobiotics biodegradation and metabolism	20	1.20656e-07	3.79025	CDA;CES2;CMPK1;GUSB;LOC102264665;LOC102264698;LOC102270291;LOC102270864;LOC102272205;LOC102275700;LOC102275834;LOC102276661;LOC102281969;LOC102282379;LOC102282831;LOC102287153;MGST3;TPMT;UGT2A1;UPP1	Reticulum	GAdult_G0d_up
bom04061	Viral protein interaction with cytokine and cytokine receptor	Environmental Information Processing	Signaling molecules and interaction	22	1.48844e-07	3.48257	ACKR4;CCL16;CCL22;CCL24;CCL5;CCR4;CCR7;CCR8;CSF1R;CX3CR1;CXCL10;CXCL13;CXCR4;IL20RA;IL20RB;IL2RA;IL2RG;LOC102284639;LOC102288304;TNF;TNFSF10;TNFSF14	Reticulum	GAdult_G0d_up
bom00040	Pentose and glucuronate interconversions	Metabolism	Carbohydrate metabolism	12	1.58005e-07	5.98017	AKR1A1;CRYL1;GUSB;LOC102264665;LOC102270291;LOC102270864;LOC102275834;LOC102282379;LOC102282831;SORD;UGDH;UGT2A1	Reticulum	GAdult_G0d_up
bom04060	Cytokine-cytokine receptor interaction	Environmental Information Processing	Signaling molecules and interaction	48	1.74316e-07	2.18195	ACKR4;CCL16;CCL22;CCL24;CCL5;CCR4;CCR7;CCR8;CD27;CD4;CD40LG;CRLF2;CSF1R;CX3CR1;CXCL10;CXCL13;CXCR4;CXCR6;EDA2R;EPOR;FASLG;IFNLR1;IL12RB1;IL12RB2;IL17A;IL17RB;IL1A;IL1R2;IL1RL2;IL20RA;IL20RB;IL21R;IL2RA;IL2RG;IL32;IL36G;IL36RN;IL7;IL7R;LOC102284639;LOC102284826;LOC102288248;LOC102288304;PRLR;TNF;TNFSF10;TNFSF12;TNFSF14	Reticulum	GAdult_G0d_up
bom04142	Lysosome	Cellular Processes	Transport and catabolism	28	4.93313e-07	2.79075	ACP5;ARSA;ATP6V0A1;CD68;CTNS;CTSA;CTSD;CTSH;CTSS;CTSW;CTSZ;FUCA1;GBA;GNS;GUSB;HEXB;HYAL1;LAMP3;LAPTM5;LIPA;LOC102275834;MAN2B1;MANBA;NAPSA;NPC2;PSAP;SORT1;TPP1	Reticulum	GAdult_G0d_up
bom00053	Ascorbate and aldarate metabolism	Metabolism	Carbohydrate metabolism	11	5.97259e-07	5.92037	AKR1A1;ALDH2;GUSB;LOC102264665;LOC102270291;LOC102270864;LOC102275834;LOC102282379;LOC102282831;UGDH;UGT2A1	Reticulum	GAdult_G0d_up
bom00590	Arachidonic acid metabolism	Metabolism	Lipid metabolism	21	8.18964e-07	3.28562	ALOX12B;ALOX5;GPX3;LOC102267155;LOC102269337;LOC102271037;LOC102271453;LOC102272308;LOC102272527;LOC102272594;LOC102279872;LOC102280721;LOC102282352;LOC102283454;LOC102284205;LTC4S;PLA2G4D;PLA2G5;PTGES2;PTGS1;TBXAS1	Reticulum	GAdult_G0d_up
bom05150	Staphylococcus aureus infection	Human Diseases	Infectious disease: bacterial	23	1.6135e-06	2.97571	C2;C3;C3AR1;CFD;ITGAL;ITGAM;ITGB2;KRT24;KRT9;LOC102268264;LOC102268548;LOC102269342;LOC102271117;LOC102271676;LOC102273069;LOC102273538;LOC102274112;LOC102282432;LOC102282998;LOC102283173;LOC102283463;LOC102285144;MASP1	Reticulum	GAdult_G0d_up
bom04612	Antigen processing and presentation	Organismal Systems	Immune system	21	2.20768e-06	3.10509	B2M;CD4;CD74;CD8A;CD8B;CIITA;CTSS;HSPA2;IFI30;LOC102268170;LOC102269342;LOC102271117;LOC102271676;LOC102281193;LOC102282432;LOC102282998;LOC102283463;LOC102285144;LOC102286791;TAP1;TNF	Reticulum	GAdult_G0d_up
bom04146	Peroxisome	Cellular Processes	Transport and catabolism	20	2.28861e-06	3.20366	ACOX2;ACSL6;AMACR;CROT;DDO;ECH1;GSTK1;HMGCL;HSD17B4;IDH1;LOC102264512;LOC102268462;LOC102281973;MPV17L;NOS2;NUDT19;PECR;PHYH;PRDX5;SLC27A2	Reticulum	GAdult_G0d_up
bom05140	Leishmaniasis	Human Diseases	Infectious disease: parasitic	19	2.30524e-06	3.32016	C3;IL1A;ITGAM;ITGB2;LOC102269342;LOC102271117;LOC102271676;LOC102273538;LOC102274112;LOC102282432;LOC102282998;LOC102283173;LOC102283463;LOC102285144;LOC102288244;MAPK13;NCF1;NOS2;TNF	Reticulum	GAdult_G0d_up
bom05204	Chemical carcinogenesis - DNA adducts	Human Diseases	Cancer: overview	16	4.9002e-06	3.5881	EPHX1;GSTK1;LOC102264665;LOC102264698;LOC102270291;LOC102270864;LOC102272205;LOC102275700;LOC102276661;LOC102280721;LOC102281969;LOC102282379;LOC102282831;LOC102284686;MGST3;UGT2A1	Reticulum	GAdult_G0d_up
bom04658	Th1 and Th2 cell differentiation	Organismal Systems	Immune system	22	5.89194e-06	2.84633	CD247;CD3D;CD3E;CD3G;CD4;IL12RB1;IL12RB2;IL2RA;IL2RG;LAT;LOC102269342;LOC102271117;LOC102271676;LOC102272934;LOC102282432;LOC102282998;LOC102283463;LOC102284639;LOC102285144;MAPK13;TBX21;ZAP70	Reticulum	GAdult_G0d_up
bom05330	Allograft rejection	Human Diseases	Immune disease	15	7.16304e-06	3.66965	CD40LG;FASLG;LOC102268170;LOC102269342;LOC102271117;LOC102271676;LOC102281193;LOC102282432;LOC102282998;LOC102283173;LOC102283463;LOC102285144;LOC102286791;PRF1;TNF	Reticulum	GAdult_G0d_up
bom04659	Th17 cell differentiation	Organismal Systems	Immune system	24	8.4711e-06	2.64696	CD247;CD3D;CD3E;CD3G;CD4;IL12RB1;IL17A;IL21R;IL2RA;IL2RG;IRF4;LAT;LOC102269342;LOC102271117;LOC102271676;LOC102282432;LOC102282998;LOC102283463;LOC102284639;LOC102285144;LOC102285579;MAPK13;TBX21;ZAP70	Reticulum	GAdult_G0d_up
bom04512	ECM-receptor interaction	Environmental Information Processing	Signaling molecules and interaction	27	9.03075e-14	5.52767	COL1A1;COL1A2;COL2A1;COL4A1;COL4A2;COL4A5;COL4A6;COL6A1;COL6A6;COL9A1;COL9A3;COMP;FRAS1;FREM2;ITGA10;ITGA5;ITGA8;ITGB1;LAMA2;LAMA3;LAMB1;LAMC1;LOC102268113;NPNT;SPP1;SV2B;SV2C	Reticulum	GAdult_G0d_down
bom04974	Protein digestion and absorption	Organismal Systems	Digestive system	30	3.29103e-11	4.0193	ATP1A3;ATP1B1;COL11A1;COL12A1;COL13A1;COL14A1;COL16A1;COL1A1;COL1A2;COL21A1;COL28A1;COL2A1;COL3A1;COL4A1;COL4A2;COL4A5;COL4A6;COL5A1;COL5A2;COL5A3;COL6A1;COL6A6;COL7A1;COL9A1;COL9A3;LOC102268113;LOC106701596;PRSS2;SLC1A1;SLC1A5	Reticulum	GAdult_G0d_down
bom04514	Cell adhesion molecules	Environmental Information Processing	Signaling molecules and interaction	25	1.80642e-06	2.84701	ALCAM;CD276;CDH2;CDH3;CLDN10;CLDN19;CNTN2;CNTNAP1;IGSF11;ITGA8;ITGB1;L1CAM;LOC102269592;LRRC4B;LRRC4C;MPZ;NCAM1;NCAM2;NEGR1;NLGN1;NRCAM;PDCD1;SELP;VCAN;VTCN1	Reticulum	GAdult_G0d_down
bom04510	Focal adhesion	Cellular Processes	Cellular community - eukaryotes	28	5.47022e-06	2.51322	CAPN2;CAV1;COL1A1;COL1A2;COL2A1;COL4A1;COL4A2;COL4A5;COL4A6;COL6A1;COL6A6;COL9A1;COL9A3;COMP;FLNC;IGF1;ITGA10;ITGA5;ITGA8;ITGB1;LAMA2;LAMA3;LAMB1;LAMC1;LOC102268113;SHC2;SHC4;SPP1	Reticulum	GAdult_G0d_down
bom04360	Axon guidance	Organismal Systems	Development and regeneration	26	7.60966e-06	2.57468	CAMK2A;CAMK2B;DCC;DPYSL5;EFNB3;EPHA4;EPHA7;ITGB1;L1CAM;LOC102279308;LOC102279399;LRRC4C;NFATC2;PTCH1;SEMA3A;SEMA3C;SEMA3F;SEMA4F;SEMA6D;SEMA7A;SMO;SRGAP1;SSH2;UNC5C;UNC5D;WNT4	Reticulum	GAdult_G0d_down
bom05165	Human papillomavirus infection	Human Diseases	Infectious disease: viral	39	7.92837e-06	2.0962	APC2;ATP6V0A4;COL1A1;COL1A2;COL2A1;COL4A1;COL4A2;COL4A5;COL4A6;COL6A1;COL6A6;COL9A1;COL9A3;COMP;CREB3L1;CREB3L2;DVL2;HES4;HEY1;HEYL;ITGA10;ITGA5;ITGA8;ITGB1;LAMA2;LAMA3;LAMB1;LAMC1;LOC102268113;LOC102286123;NOTCH2;PPP2R2B;PPP2R2C;SPP1;WNT11;WNT16;WNT2B;WNT4;WNT7A	Reticulum	GAdult_G0d_down
bom04151	PI3K-Akt signaling pathway	Environmental Information Processing	Signal transduction	41	1.24152e-05	2.01362	ANGPT4;COL1A1;COL1A2;COL2A1;COL4A1;COL4A2;COL4A5;COL4A6;COL6A1;COL6A6;COL9A1;COL9A3;COMP;CREB3L1;CREB3L2;FGF1;FGF10;FGF18;FGFR1;FGFR4;GNG2;GNG3;IGF1;IGF2;IL6;ITGA10;ITGA5;ITGA8;ITGB1;LAMA2;LAMA3;LAMB1;LAMC1;LOC102268113;NGFR;NTRK2;OSMR;PIK3CG;PPP2R2B;PPP2R2C;SPP1	Reticulum	GAdult_G0d_down
bom05200	Pathways in cancer	Human Diseases	Cancer: overview	53	2.09575e-05	1.78834	ADCY2;ALK;APC2;CAMK2A;CAMK2B;COL4A1;COL4A2;COL4A5;COL4A6;CTNNA2;DAPK2;DCC;DVL2;EDNRB;FGF1;FGF10;FGF18;FGFR1;FGFR4;GADD45G;GLI1;GLI2;GNA12;GNG2;GNG3;HEY1;HEYL;IGF1;IGF2;IL6;ITGB1;KNG1;LAMA2;LAMA3;LAMB1;LAMC1;LOC102277774;LOC102286123;LRP6;NOTCH2;PTCH1;RARB;RET;RUNX1;SMAD3;SMO;TGFB2;TGFB3;WNT11;WNT16;WNT2B;WNT4;WNT7A	Reticulum	GAdult_G0d_down
bom05217	Basal cell carcinoma	Human Diseases	Cancer: specific types	12	0.000133643	3.47063	APC2;DVL2;GADD45G;GLI1;GLI2;PTCH1;SMO;WNT11;WNT16;WNT2B;WNT4;WNT7A	Reticulum	GAdult_G0d_down
bom05146	Amoebiasis	Human Diseases	Infectious disease: parasitic	16	0.000140873	2.83042	COL1A1;COL1A2;COL3A1;COL4A1;COL4A2;COL4A5;COL4A6;IL6;LAMA2;LAMA3;LAMB1;LAMC1;LOC102269246;LOC102286123;TGFB2;TGFB3	Reticulum	GAdult_G0d_down
bom04725	Cholinergic synapse	Organismal Systems	Nervous system	17	0.000147328	2.71714	ACHE;ADCY2;CACNA1B;CAMK2A;CAMK2B;CHAT;CHRM4;CHRNB4;CREB3L1;CREB3L2;GNG2;GNG3;KCNQ2;KCNQ3;LOC102271011;PIK3CG;SLC18A3	Reticulum	GAdult_G0d_down
bom04080	Neuroactive ligand-receptor interaction	Environmental Information Processing	Signaling molecules and interaction	36	0.000157472	1.89035	ADCYAP1R1;ADRA2A;AVPR1A;C5;CHRM4;CHRNB4;CRHR2;EDNRB;GABRA3;GABRB3;GABRE;GABRG2;GAL;GRIA2;GRID2;GRIK3;GRIK4;HCRTR1;HRH2;KNG1;LOC102287353;MCHR1;NMB;NPY;P2RX2;PENK;PRSS2;PTGFR;PTH1R;S1PR3;SLURP1;SST;SSTR2;TAC1;TACR3;VIP	Reticulum	GAdult_G0d_down
bom05226	Gastric cancer	Human Diseases	Cancer: specific types	20	0.000159738	2.46227	APC2;CTNNA2;DVL2;FGF1;FGF10;FGF18;GADD45G;LOC102277774;LRP6;RARB;SHC2;SHC4;SMAD3;TGFB2;TGFB3;WNT11;WNT16;WNT2B;WNT4;WNT7A	Reticulum	GAdult_G0d_down
bom04926	Relaxin signaling pathway	Organismal Systems	Endocrine system	18	0.000272929	2.50363	ACTA2;ADCY2;COL1A1;COL1A2;COL3A1;COL4A1;COL4A2;COL4A5;COL4A6;CREB3L1;CREB3L2;EDNRB;GNG2;GNG3;LOC102286123;NOS1;SHC2;SHC4	Reticulum	GAdult_G0d_down
bom00532	Glycosaminoglycan biosynthesis - chondroitin sulfate / dermatan sulfate	Metabolism	Glycan biosynthesis and metabolism	6	0.00027902	6.07361	CHPF;CHPF2;CHST14;CHST15;UST;XYLT1	Reticulum	GAdult_G0d_down
bom04310	Wnt signaling pathway	Environmental Information Processing	Signal transduction	21	0.000360177	2.26413	APC2;CAMK2A;CAMK2B;CXXC4;DKK1;DVL2;LGR6;LRP6;NFATC2;NOTUM;ROR1;RSPO2;RSPO3;SFRP5;SMAD3;VANGL2;WNT11;WNT16;WNT2B;WNT4;WNT7A	Reticulum	GAdult_G0d_down
bom04971	Gastric acid secretion	Organismal Systems	Digestive system	13	0.000373335	2.96089	ADCY2;ATP1A3;ATP1B1;CAMK2A;CAMK2B;CFTR;HRH2;KCNJ10;KCNJ15;LOC102266781;LOC102286123;SST;SSTR2	Reticulum	GAdult_G0d_down
bom05224	Breast cancer	Human Diseases	Cancer: specific types	19	0.000490388	2.32346	APC2;DVL2;FGF1;FGF10;FGF18;FGFR1;GADD45G;HEY1;HEYL;IGF1;LRP6;NOTCH2;SHC2;SHC4;WNT11;WNT16;WNT2B;WNT4;WNT7A	Reticulum	GAdult_G0d_down
bom04390	Hippo signaling pathway	Environmental Information Processing	Signal transduction	19	0.00127341	2.15028	APC2;BMP8B;CTGF;CTNNA2;DLG5;DVL2;FGF1;GLI2;PPP2R2B;PPP2R2C;SMAD3;TEAD4;TGFB2;TGFB3;WNT11;WNT16;WNT2B;WNT4;WNT7A	Reticulum	GAdult_G0d_down
bom05144	Malaria	Human Diseases	Infectious disease: parasitic	10	0.0014271	3.03681	ACKR1;COMP;IL6;LOC102267004;LOC102268919;LOC102279228;LRP1;SELP;TGFB2;TGFB3	Reticulum	GAdult_G0d_down
bom00830	Retinol metabolism	Metabolism	Metabolism of cofactors and vitamins	9	2.774e-10	21.1256	ALDH1A2;LOC102264665;LOC102266920;LOC102270864;LOC102282831;LOC102284246;PNPLA4;RDH10;UGT2A1	Reticulum	G60d_G20d_up
bom04976	Bile secretion	Organismal Systems	Digestive system	7	1.66697e-06	11.9341	LOC102264665;LOC102267113;LOC102270864;LOC102282831;SLC4A4;SLC9A3;UGT2A1	Reticulum	G60d_G20d_up
bom00053	Ascorbate and aldarate metabolism	Metabolism	Carbohydrate metabolism	4	1.49145e-05	25.9141	LOC102264665;LOC102270864;LOC102282831;UGT2A1	Reticulum	G60d_G20d_up
bom00040	Pentose and glucuronate interconversions	Metabolism	Carbohydrate metabolism	4	2.05031e-05	23.9945	LOC102264665;LOC102270864;LOC102282831;UGT2A1	Reticulum	G60d_G20d_up
bom00982	Drug metabolism - cytochrome P450	Metabolism	Xenobiotics biodegradation and metabolism	5	2.65498e-05	13.9623	LOC102264665;LOC102270864;LOC102282831;LOC102284246;UGT2A1	Reticulum	G60d_G20d_up
bom00980	Metabolism of xenobiotics by cytochrome P450	Metabolism	Xenobiotics biodegradation and metabolism	5	3.68002e-05	13.0615	LOC102264665;LOC102270864;LOC102282831;LOC102284246;UGT2A1	Reticulum	G60d_G20d_up
bom00140	Steroid hormone biosynthesis	Metabolism	Lipid metabolism	5	7.09955e-05	11.4058	LOC102264665;LOC102270864;LOC102271037;LOC102282831;UGT2A1	Reticulum	G60d_G20d_up
bom00860	Porphyrin and chlorophyll metabolism	Metabolism	Metabolism of cofactors and vitamins	4	8.2005e-05	17.0487	LOC102264665;LOC102270864;LOC102282831;UGT2A1	Reticulum	G60d_G20d_up
bom05134	Legionellosis	Human Diseases	Infectious disease: bacterial	4	0.000375846	11.5688	CD14;HSPA2;HSPA6;LOC102278697	Reticulum	G60d_G20d_up
bom05204	Chemical carcinogenesis - DNA adducts	Human Diseases	Cancer: overview	4	0.000489973	10.7975	LOC102264665;LOC102270864;LOC102282831;UGT2A1	Reticulum	G60d_G20d_up
bom00650	Butanoate metabolism	Metabolism	Carbohydrate metabolism	3	0.000725739	16.7548	ACADS;BDH1;HMGCL	Reticulum	G60d_G20d_up
bom00983	Drug metabolism - other enzymes	Metabolism	Xenobiotics biodegradation and metabolism	4	0.000928564	9.12467	LOC102264665;LOC102270864;LOC102282831;UGT2A1	Reticulum	G60d_G20d_up
bom00920	Sulfur metabolism	Metabolism	Energy metabolism	2	0.00163129	32.3926	PAPSS2;SELENBP1	Reticulum	G60d_G20d_up
bom04612	Antigen processing and presentation	Organismal Systems	Immune system	4	0.00233209	7.11925	HSPA2;HSPA6;LOC102275624;LOC102278697	Reticulum	G60d_G20d_up
bom00072	Synthesis and degradation of ketone bodies	Metabolism	Lipid metabolism	2	0.00237369	26.9938	BDH1;HMGCL	Reticulum	G60d_G20d_up
bom00910	Nitrogen metabolism	Metabolism	Energy metabolism	2	0.00424809	20.2454	CA12;LOC102266213	Reticulum	G60d_G20d_up
bom04213	Longevity regulating pathway - multiple species	Organismal Systems	Aging	3	0.0059398	8.09815	HSPA2;HSPA6;LOC102278697	Reticulum	G60d_G20d_up
bom04964	Proximal tubule bicarbonate reclamation	Organismal Systems	Excretory system	2	0.00798627	14.7239	SLC4A4;SLC9A3	Reticulum	G60d_G20d_up
bom00010	Glycolysis / Gluconeogenesis	Metabolism	Carbohydrate metabolism	3	0.00840296	7.14542	FBP1;LOC102270280;LOC102284246	Reticulum	G60d_G20d_up
bom05417	Lipid and atherosclerosis	Human Diseases	Cardiovascular disease	5	0.0109863	3.69778	CD14;HSPA2;HSPA6;LOC102272762;LOC102278697	Reticulum	G60d_G20d_up
bom04657	IL-17 signaling pathway	Organismal Systems	Immune system	5	0.000448264	7.73298	CCL20;IL17C;LOC102271445;S100A8;S100A9	Reticulum	G60d_G20d_down
bom04061	Viral protein interaction with cytokine and cytokine receptor	Environmental Information Processing	Signaling molecules and interaction	3	0.0251207	4.74896	CCL20;IL10RA;LOC102271445	Reticulum	G60d_G20d_down
bom00524	Neomycin, kanamycin and gentamicin biosynthesis	Metabolism	Biosynthesis of other secondary metabolites	1	0.0366198	26.9108	HKDC1	Reticulum	G60d_G20d_down
bom05143	African trypanosomiasis	Human Diseases	Infectious disease: parasitic	2	0.0370344	6.5636	APOA1;KNG1	Reticulum	G60d_G20d_down
bom00564	Glycerophospholipid metabolism	Metabolism	Lipid metabolism	3	0.0429769	3.8444	CHAT;LPIN1;PLA2G4E	Reticulum	G60d_G20d_down
bom00600	Sphingolipid metabolism	Metabolism	Lipid metabolism	2	0.0530325	5.38215	CERS3;SMPD3	Reticulum	G60d_G20d_down
bom00330	Arginine and proline metabolism	Metabolism	Amino acid metabolism	2	0.0568691	5.17515	ARG2;PRODH	Reticulum	G60d_G20d_down
bom04975	Fat digestion and absorption	Organismal Systems	Digestive system	2	0.0568691	5.17515	APOA1;DGAT2	Reticulum	G60d_G20d_down
bom00750	Vitamin B6 metabolism	Metabolism	Metabolism of cofactors and vitamins	1	0.0579546	16.8192	LOC102281032	Reticulum	G60d_G20d_down
bom04060	Cytokine-cytokine receptor interaction	Environmental Information Processing	Signaling molecules and interaction	5	0.0683944	2.27287	CCL20;IL10RA;IL17C;LEPR;LOC102271445	Reticulum	G60d_G20d_down
bom00982	Drug metabolism - cytochrome P450	Metabolism	Xenobiotics biodegradation and metabolism	2	0.068931	4.63979	FMO1;LOC102281032	Reticulum	G60d_G20d_down
bom00480	Glutathione metabolism	Metabolism	Metabolism of other amino acids	2	0.0752512	4.4116	CHAC1;GGCT	Reticulum	G60d_G20d_down
bom05217	Basal cell carcinoma	Human Diseases	Cancer: specific types	2	0.0795641	4.27155	FZD10;WNT16	Reticulum	G60d_G20d_down
bom00561	Glycerolipid metabolism	Metabolism	Lipid metabolism	2	0.0906717	3.95747	DGAT2;LPIN1	Reticulum	G60d_G20d_down
bom00830	Retinol metabolism	Metabolism	Metabolism of cofactors and vitamins	2	0.0929458	3.90011	LOC102266587;LOC102281032	Reticulum	G60d_G20d_down
bom04978	Mineral absorption	Organismal Systems	Digestive system	2	0.0952367	3.8444	ATP7B;SLC26A9	Reticulum	G60d_G20d_down
bom00533	Glycosaminoglycan biosynthesis - keratan sulfate	Metabolism	Glycan biosynthesis and metabolism	1	0.0992379	9.61099	CHST1	Reticulum	G60d_G20d_down
bom04150	mTOR signaling pathway	Environmental Information Processing	Signal transduction	3	0.114273	2.53875	FZD10;LPIN1;WNT16	Reticulum	G60d_G20d_down
bom03320	PPAR signaling pathway	Organismal Systems	Endocrine system	2	0.121437	3.32232	APOA1;LOC102283568	Reticulum	G60d_G20d_down
bom00670	One carbon pool by folate	Metabolism	Metabolism of cofactors and vitamins	1	0.125765	7.47521	MTHFD1L	Reticulum	G60d_G20d_down
bom04978	Mineral absorption	Organismal Systems	Digestive system	7	7.91614e-06	9.50652	CLCN2;FTH1;LOC102276607;LOC102277920;LOC102278728;LOC102279002;LOC102279288	Reticulum	G15m_G60d_up
bom00140	Steroid hormone biosynthesis	Metabolism	Lipid metabolism	7	8.70743e-06	9.37263	LOC102269337;LOC102270291;LOC102272308;LOC102272594;LOC102282831;LOC102284205;LOC102284686	Reticulum	G15m_G60d_up
bom00590	Arachidonic acid metabolism	Metabolism	Lipid metabolism	7	3.09601e-05	7.73787	EPHX2;GPX3;LOC102269337;LOC102272308;LOC102272594;LOC102275513;LOC102284205	Reticulum	G15m_G60d_up
bom05204	Chemical carcinogenesis - DNA adducts	Human Diseases	Cancer: overview	5	0.000399551	7.9221	GSTM3;LOC102270291;LOC102282831;LOC102283655;LOC102284686	Reticulum	G15m_G60d_up
bom00480	Glutathione metabolism	Metabolism	Metabolism of other amino acids	5	0.000431646	7.79223	GPX3;GSR;GSTM3;LOC102283655;ODC1	Reticulum	G15m_G60d_up
bom04913	Ovarian steroidogenesis	Organismal Systems	Endocrine system	5	0.00046565	7.66655	LOC102269337;LOC102272308;LOC102272594;LOC102284205;LOC102286944	Reticulum	G15m_G60d_up
bom00790	Folate biosynthesis	Metabolism	Metabolism of cofactors and vitamins	4	0.000862315	9.27466	LOC102269337;LOC102272308;LOC102272594;LOC102284205	Reticulum	G15m_G60d_up
bom00983	Drug metabolism - other enzymes	Metabolism	Xenobiotics biodegradation and metabolism	5	0.000869869	6.69473	CDA;GSTM3;LOC102270291;LOC102282831;LOC102283655	Reticulum	G15m_G60d_up
bom04060	Cytokine-cytokine receptor interaction	Environmental Information Processing	Signaling molecules and interaction	10	0.00104856	3.21166	CCL20;CCL22;EDA2R;IFNAR2;IFNLR1;IL10RB;IL19;IL1B;LOC102268679;TNFRSF12A	Reticulum	G15m_G60d_up
bom04668	TNF signaling pathway	Environmental Information Processing	Signal transduction	6	0.0011781	5.04771	CCL20;IL1B;LOC102268679;LOC102288330;LOC102288402;SOCS3	Reticulum	G15m_G60d_up
bom05133	Pertussis	Human Diseases	Infectious disease: bacterial	5	0.00149139	5.94158	C2;C3;CD14;IL1B;LOC102268679	Reticulum	G15m_G60d_up
bom04146	Peroxisome	Cellular Processes	Transport and catabolism	5	0.00185324	5.65864	ACOT8;EPHX2;LOC102268462;MPV17L2;SLC27A2	Reticulum	G15m_G60d_up
bom04061	Viral protein interaction with cytokine and cytokine receptor	Environmental Information Processing	Signaling molecules and interaction	5	0.00195294	5.59207	CCL20;CCL22;IL10RB;IL19;LOC102268679	Reticulum	G15m_G60d_up
bom04657	IL-17 signaling pathway	Organismal Systems	Immune system	5	0.00216405	5.46352	CCL20;FOSL1;IL1B;LOC102268679;LOC102288330	Reticulum	G15m_G60d_up
bom04610	Complement and coagulation cascades	Organismal Systems	Immune system	5	0.00239137	5.34074	C2;C3;C5AR1;PLAUR;SERPINE1	Reticulum	G15m_G60d_up
bom05134	Legionellosis	Human Diseases	Infectious disease: bacterial	4	0.00277412	6.79037	C3;CD14;IL1B;LOC102277620	Reticulum	G15m_G60d_up
bom00982	Drug metabolism - cytochrome P450	Metabolism	Xenobiotics biodegradation and metabolism	4	0.00315378	6.55622	GSTM3;LOC102270291;LOC102282831;LOC102283655	Reticulum	G15m_G60d_up
bom04216	Ferroptosis	Cellular Processes	Cell growth and death	4	0.00315378	6.55622	FTH1;LOC102276607;LOC102277920;TFRC	Reticulum	G15m_G60d_up
bom05152	Tuberculosis	Human Diseases	Infectious disease: bacterial	7	0.00346241	3.55859	C3;CD14;IL10RB;IL1B;LOC102273069;LOC102277620;LOC102281707	Reticulum	G15m_G60d_up
bom00980	Metabolism of xenobiotics by cytochrome P450	Metabolism	Xenobiotics biodegradation and metabolism	4	0.00401664	6.13324	GSTM3;LOC102270291;LOC102282831;LOC102283655	Reticulum	G15m_G60d_up
bom04512	ECM-receptor interaction	Environmental Information Processing	Signaling molecules and interaction	16	1.57057e-13	12.0947	COL1A1;COL1A2;COL4A1;COL4A5;COL4A6;COL6A1;COL6A6;FRAS1;FREM1;FREM2;ITGA8;LAMA2;LAMB1;LOC102268113;NPNT;SPP1	Reticulum	G15m_G60d_down
bom04974	Protein digestion and absorption	Organismal Systems	Digestive system	17	1.21873e-11	8.40962	COL11A1;COL14A1;COL16A1;COL1A1;COL1A2;COL21A1;COL3A1;COL4A1;COL4A5;COL4A6;COL5A1;COL5A2;COL5A3;COL6A1;COL6A6;LOC102268113;SLC15A1	Reticulum	G15m_G60d_down
bom04510	Focal adhesion	Cellular Processes	Cellular community - eukaryotes	15	2.94294e-07	4.9712	COL1A1;COL1A2;COL4A1;COL4A5;COL4A6;COL6A1;COL6A6;IGF1;ITGA8;LAMA2;LAMB1;LOC102268113;PIK3R1;SPP1;TLN2	Reticulum	G15m_G60d_down
bom05146	Amoebiasis	Human Diseases	Infectious disease: parasitic	11	3.19728e-07	7.18491	ARG1;COL1A1;COL1A2;COL3A1;COL4A1;COL4A5;COL4A6;LAMA2;LAMB1;PIK3R1;TGFB3	Reticulum	G15m_G60d_down
bom04151	PI3K-Akt signaling pathway	Environmental Information Processing	Signal transduction	19	2.11468e-06	3.44545	ANGPT4;COL1A1;COL1A2;COL4A1;COL4A5;COL4A6;COL6A1;COL6A6;FGF10;IGF1;IGF2;ITGA8;KITLG;LAMA2;LAMB1;LOC102268113;NTRK2;PIK3R1;SPP1	Reticulum	G15m_G60d_down
bom04360	Axon guidance	Organismal Systems	Development and regeneration	12	1.74065e-05	4.38763	CXCL12;EFNB3;EPHA3;LOC102279308;PIK3R1;RGMA;SEMA3A;SEMA6C;SEMA6D;SLIT2;SRGAP3;UNC5D	Reticulum	G15m_G60d_down
bom04933	AGE-RAGE signaling pathway in diabetic complications	Human Diseases	Endocrine and metabolic disease	9	2.61143e-05	5.71219	COL1A1;COL1A2;COL3A1;COL4A1;COL4A5;COL4A6;PIK3R1;PLCE1;TGFB3	Reticulum	G15m_G60d_down
bom04926	Relaxin signaling pathway	Organismal Systems	Endocrine system	9	0.000137591	4.62208	ADCY2;COL1A1;COL1A2;COL3A1;COL4A1;COL4A5;COL4A6;EDNRB;PIK3R1	Reticulum	G15m_G60d_down
bom05165	Human papillomavirus infection	Human Diseases	Infectious disease: viral	15	0.000144651	2.97686	COL1A1;COL1A2;COL4A1;COL4A5;COL4A6;COL6A1;COL6A6;FZD2;ITGA8;LAMA2;LAMB1;LOC102268113;PIK3R1;SPP1;WNT10A	Reticulum	G15m_G60d_down
bom05414	Dilated cardiomyopathy	Human Diseases	Cardiovascular disease	7	0.000577404	4.85504	ACTC1;ADCY2;IGF1;ITGA8;LAMA2;SGCD;TGFB3	Reticulum	G15m_G60d_down
bom04080	Neuroactive ligand-receptor interaction	Environmental Information Processing	Signaling molecules and interaction	14	0.000619468	2.71434	ADRA2C;ADRB3;CHRNA3;EDNRB;GABRA1;GABRA3;GABRB2;GRIA3;GRID2;MCHR1;OPRK1;PTGFR;SLURP1;SST	Reticulum	G15m_G60d_down
bom05410	Hypertrophic cardiomyopathy	Human Diseases	Cardiovascular disease	6	0.00228174	4.43584	ACTC1;IGF1;ITGA8;LAMA2;SGCD;TGFB3	Reticulum	G15m_G60d_down
bom05033	Nicotine addiction	Human Diseases	Substance dependence	4	0.00256265	6.9002	GABRA1;GABRA3;GABRB2;GRIA3	Reticulum	G15m_G60d_down
bom05200	Pathways in cancer	Human Diseases	Cancer: overview	17	0.00257163	2.11798	ADCY2;COL4A1;COL4A5;COL4A6;CXCL12;EDNRB;FGF10;FZD2;IGF1;IGF2;KITLG;LAMA2;LAMB1;LRP6;PIK3R1;TGFB3;WNT10A	Reticulum	G15m_G60d_down
bom05205	Proteoglycans in cancer	Human Diseases	Cancer: overview	9	0.00330873	2.9681	COL1A1;COL1A2;FZD2;HPSE2;IGF1;IGF2;PIK3R1;PLCE1;WNT10A	Reticulum	G15m_G60d_down
bom05222	Small cell lung cancer	Human Diseases	Cancer: specific types	6	0.00331225	4.119	COL4A1;COL4A5;COL4A6;LAMA2;LAMB1;PIK3R1	Reticulum	G15m_G60d_down
bom04310	Wnt signaling pathway	Environmental Information Processing	Signal transduction	8	0.0036291	3.18471	FZD2;LGR5;LRP6;PRICKLE1;RSPO3;SFRP5;VANGL2;WNT10A	Reticulum	G15m_G60d_down
bom04015	Rap1 signaling pathway	Environmental Information Processing	Signal transduction	9	0.00591841	2.71521	ADCY2;ANGPT4;FGF10;IGF1;KITLG;MAGI3;PIK3R1;PLCE1;TLN2	Reticulum	G15m_G60d_down
bom04611	Platelet activation	Organismal Systems	Immune system	6	0.01029	3.25533	ADCY2;COL1A1;COL1A2;COL3A1;PIK3R1;TLN2	Reticulum	G15m_G60d_down
bom04213	Longevity regulating pathway - multiple species	Organismal Systems	Aging	4	0.0119647	4.48513	ADCY2;FOXA2;IGF1;PIK3R1	Reticulum	G15m_G60d_down
bom04640	Hematopoietic cell lineage	Organismal Systems	Immune system	2	0.00267022	24.7412	KITLG;LOC102269978	Reticulum	GAdult_15m_up
bom04014	Ras signaling pathway	Environmental Information Processing	Signal transduction	2	0.0156617	9.95561	KITLG;NTRK2	Reticulum	GAdult_15m_up
bom04010	MAPK signaling pathway	Environmental Information Processing	Signal transduction	2	0.0208759	8.55773	KITLG;NTRK2	Reticulum	GAdult_15m_up
bom05310	Asthma	Human Diseases	Immune disease	1	0.0315894	31.2357	LOC102269978	Reticulum	GAdult_15m_up
bom04151	PI3K-Akt signaling pathway	Environmental Information Processing	Signal transduction	2	0.0327119	6.73546	KITLG;NTRK2	Reticulum	GAdult_15m_up
bom04930	Type II diabetes mellitus	Human Diseases	Endocrine and metabolic disease	1	0.0354773	27.7651	ADIPOQ	Reticulum	GAdult_15m_up
bom05330	Allograft rejection	Human Diseases	Immune disease	1	0.0432128	22.7169	LOC102269978	Reticulum	GAdult_15m_up
bom04672	Intestinal immune network for IgA production	Organismal Systems	Immune system	1	0.0462922	21.1768	LOC102269978	Reticulum	GAdult_15m_up
bom04940	Type I diabetes mellitus	Human Diseases	Endocrine and metabolic disease	1	0.0470607	20.8238	LOC102269978	Reticulum	GAdult_15m_up
bom05320	Autoimmune thyroid disease	Human Diseases	Immune disease	1	0.0501293	19.5223	LOC102269978	Reticulum	GAdult_15m_up
bom05332	Graft-versus-host disease	Human Diseases	Immune disease	1	0.0516605	18.9307	LOC102269978	Reticulum	GAdult_15m_up
bom04920	Adipocytokine signaling pathway	Organismal Systems	Endocrine system	1	0.0539533	18.1077	ADIPOQ	Reticulum	GAdult_15m_up
bom05321	Inflammatory bowel disease	Human Diseases	Immune disease	1	0.0592847	16.4398	LOC102269978	Reticulum	GAdult_15m_up
bom05140	Leishmaniasis	Human Diseases	Infectious disease: parasitic	1	0.0600442	16.2263	LOC102269978	Reticulum	GAdult_15m_up
bom05416	Viral myocarditis	Human Diseases	Cardiovascular disease	1	0.0615616	15.8156	LOC102269978	Reticulum	GAdult_15m_up
bom03320	PPAR signaling pathway	Organismal Systems	Endocrine system	1	0.063077	15.425	ADIPOQ	Reticulum	GAdult_15m_up
bom04211	Longevity regulating pathway	Organismal Systems	Aging	1	0.0691175	14.0385	ADIPOQ	Reticulum	GAdult_15m_up
bom04612	Antigen processing and presentation	Organismal Systems	Immune system	1	0.0706223	13.73	LOC102269978	Reticulum	GAdult_15m_up
bom04976	Bile secretion	Organismal Systems	Digestive system	1	0.0736259	13.1519	SLC22A8	Reticulum	GAdult_15m_up
bom04658	Th1 and Th2 cell differentiation	Organismal Systems	Immune system	1	0.0803534	12.0137	LOC102269978	Reticulum	GAdult_15m_up
bom04146	Peroxisome	Cellular Processes	Transport and catabolism	2	0.00314098	23.1376	ACOT8;DAO	Reticulum	GAdult_15m_down
bom00120	Primary bile acid biosynthesis	Metabolism	Lipid metabolism	1	0.0143212	69.4127	ACOT8	Reticulum	GAdult_15m_down
bom00100	Steroid biosynthesis	Metabolism	Lipid metabolism	1	0.0204028	48.5889	LOC102278257	Reticulum	GAdult_15m_down
bom00260	Glycine, serine and threonine metabolism	Metabolism	Amino acid metabolism	1	0.0473595	20.6761	DAO	Reticulum	GAdult_15m_down
bom04979	Cholesterol metabolism	Organismal Systems	Digestive system	1	0.0493298	19.8322	ABCB11	Reticulum	GAdult_15m_down
bom00330	Arginine and proline metabolism	Metabolism	Amino acid metabolism	1	0.0522784	18.688	DAO	Reticulum	GAdult_15m_down
bom02010	ABC transporters	Environmental Information Processing	Membrane transport	1	0.0610757	15.9308	ABCB11	Reticulum	GAdult_15m_down
bom00590	Arachidonic acid metabolism	Metabolism	Lipid metabolism	1	0.0851329	11.2997	LOC102275513	Reticulum	GAdult_15m_down
bom04657	IL-17 signaling pathway	Organismal Systems	Immune system	1	0.0860837	11.1699	LOC102288330	Reticulum	GAdult_15m_down
bom01522	Endocrine resistance	Human Diseases	Drug resistance: antineoplastic	1	0.0936584	10.2292	ABCB11	Reticulum	GAdult_15m_down
bom04976	Bile secretion	Organismal Systems	Digestive system	1	0.0936584	10.2292	ABCB11	Reticulum	GAdult_15m_down
bom05215	Prostate cancer	Human Diseases	Cancer: specific types	1	0.0974248	9.81594	LOC102288330	Reticulum	GAdult_15m_down
bom04928	Parathyroid hormone synthesis, secretion and action	Organismal Systems	Endocrine system	1	0.103048	9.25503	LOC102278257	Reticulum	GAdult_15m_down
bom05323	Rheumatoid arthritis	Human Diseases	Immune disease	1	0.103048	9.25503	LOC102288330	Reticulum	GAdult_15m_down
bom04668	TNF signaling pathway	Environmental Information Processing	Signal transduction	1	0.110498	8.5998	LOC102288330	Reticulum	GAdult_15m_down
bom04726	Serotonergic synapse	Organismal Systems	Nervous system	1	0.117892	8.03122	LOC102275513	Reticulum	GAdult_15m_down
bom04723	Retrograde endocannabinoid signaling	Organismal Systems	Nervous system	1	0.140649	6.65601	LOC102288085	Reticulum	GAdult_15m_down
bom04217	Necroptosis	Cellular Processes	Cell growth and death	1	0.15936	5.81903	SPATA2L	Reticulum	GAdult_15m_down
bom05164	Influenza A	Human Diseases	Infectious disease: viral	1	0.162003	5.71634	TMPRSS4	Reticulum	GAdult_15m_down
bom05152	Tuberculosis	Human Diseases	Infectious disease: bacterial	1	0.176843	5.19667	LOC102278257	Reticulum	GAdult_15m_down
