# Supplementary material for: Transcriptome profiling in rumen, reticulum, omasum, and abomasum tissues during the developmental transition of pre-ruminant to the ruminant in yaks
Source: Frontiers journal article supplement (doi:10.3389/fvets.2023.1204706), 2023-09-22
Supplement: Data_Sheet_1.zip [file Table S9-The top 20 KEGG enrichment pathways of common DEmRNAs in reticulum.xls]

## Sheet: Table S9
id	Term	Classification_level1	Classification_level2	ListHits	p-value	Enrichment_score	geneID	hyperlink_only_excel
bom04514	Cell adhesion molecules	Environmental Information Processing	Signaling molecules and interaction	66	4.01127e-11	2.17726	ALCAM;CD2;CD22;CD276;CD28;CD4;CD40LG;CD6;CD8A;CD8B;CDH2;CDH3;CLDN10;CLDN17;CLDN19;CLDN3;CLDN4;CNTN2;CNTNAP1;ICAM3;ICOS;IGSF11;ITGA4;ITGA8;ITGAL;ITGAM;ITGB1;ITGB2;L1CAM;LOC102268170;LOC102269342;LOC102269592;LOC102270654;LOC102271117;LOC102271416;LOC102271676;LOC102271748;LOC102275624;LOC102281193;LOC102282432;LOC102282998;LOC102283463;LOC102284715;LOC102285144;LOC102286791;LRRC4;LRRC4B;LRRC4C;MPZ…	bom04514
bom04061	Viral protein interaction with cytokine and cytokine receptor	Environmental Information Processing	Signaling molecules and interaction	38	4.36995e-08	2.35967	ACKR4;CCL16;CCL22;CCL24;CCL5;CCR4;CCR7;CCR8;CSF1R;CX3CR1;CXCL10;CXCL13;CXCL8;CXCL9;CXCR1;CXCR2;CXCR4;IL10RB;IL20RA;IL20RB;IL22RA1;IL2RA;IL2RG;IL6;LOC102264498;LOC102269246;LOC102271445;LOC102271913;LOC102272762;LOC102284639;LOC102287335;LOC102287450;LOC102287625;LOC102288304;TNF;TNFSF10;TNFSF14;XCR1	bom04061
bom04512	ECM-receptor interaction	Environmental Information Processing	Signaling molecules and interaction	38	1.92647e-07	2.25362	COL1A1;COL1A2;COL2A1;COL4A1;COL4A2;COL4A5;COL4A6;COL6A1;COL6A6;COL9A1;COL9A3;COMP;FN1;FRAS1;FREM1;FREM2;ITGA10;ITGA4;ITGA5;ITGA7;ITGA8;ITGB1;LAMA2;LAMA3;LAMA4;LAMB1;LAMC1;LOC102268113;LOC102268494;LOC102282698;NPNT;SPP1;SV2B;SV2C;THBS1;THBS4;TNR;VWF	bom04512
bom04640	Hematopoietic cell lineage	Organismal Systems	Immune system	41	3.38529e-07	2.14264	CD14;CD1E;CD2;CD22;CD37;CD3D;CD3E;CD3G;CD4;CD5;CD8A;CD8B;CD9;CR2;CSF1R;EPOR;FCER2;FLT3;IL1A;IL1B;IL1R2;IL2RA;IL6;IL7;IL7R;ITGA4;ITGA5;ITGAM;KITLG;LOC102267156;LOC102269342;LOC102271117;LOC102271676;LOC102282432;LOC102282998;LOC102283173;LOC102283463;LOC102285144;LOC102288394;TFRC;TNF	bom04640
bom05146	Amoebiasis	Human Diseases	Infectious disease: parasitic	41	6.31575e-07	2.10104	ACTN1;ARG1;CASP3;CD14;CD1E;COL1A1;COL1A2;COL3A1;COL4A1;COL4A2;COL4A5;COL4A6;CXCL8;FN1;GNA15;IL1B;IL1R2;IL6;ITGAM;ITGB2;LAMA2;LAMA3;LAMA4;LAMB1;LAMC1;LOC102267156;LOC102269246;LOC102277897;LOC102282698;LOC102283173;LOC102286123;LOC102288394;NOS2;PIK3CB;PIK3CD;PLCB2;SERPINB10;TGFB2;TGFB3;TLR4;TNF	bom05146
bom00280	Valine, leucine and isoleucine degradation	Metabolism	Amino acid metabolism	26	6.50749e-07	2.58931	AACS;ACAA2;ACADS;ACADSB;ACAT1;ACSF3;ALDH2;ALDH6A1;BCAT1;BCKDHA;BCKDHB;DLD;ECHS1;HADH;HIBADH;HIBCH;HMGCL;HMGCS2;IVD;LOC102281032;MCCC1;MCEE;MUT;OXCT1;PCCA;PCCB	bom00280
bom00590	Arachidonic acid metabolism	Metabolism	Lipid metabolism	36	7.2204e-07	2.20948	ALOX12B;ALOX5;EPHX2;GGT5;GPX2;GPX3;GPX7;GPX8;LOC102267155;LOC102268504;LOC102269337;LOC102270081;LOC102271037;LOC102271453;LOC102272308;LOC102272527;LOC102272594;LOC102279872;LOC102280721;LOC102282243;LOC102282352;LOC102283454;LOC102283844;LOC102284205;LOC102284880;LOC102285661;LTC4S;PLA2G2F;PLA2G4D;PLA2G4E;PLA2G4F;PLA2G5;PTGES;PTGES2;PTGS1;TBXAS1	bom00590
bom05150	Staphylococcus aureus infection	Human Diseases	Infectious disease: bacterial	41	8.54467e-07	2.08083	C1QA;C1QB;C1QC;C2;C3;C3AR1;C5;CFD;DSG1;ITGAL;ITGAM;ITGB2;KRT18;KRT23;KRT24;KRT39;KRT9;LOC102267435;LOC102267994;LOC102268264;LOC102268548;LOC102269342;LOC102269388;LOC102269519;LOC102271117;LOC102271416;LOC102271676;LOC102273069;LOC102273538;LOC102274112;LOC102281124;LOC102282186;LOC102282432;LOC102282998;LOC102283173;LOC102283463;LOC102285144;LOC102286356;MASP1;SELP;SELPLG	bom05150
bom00020	Citrate cycle (TCA cycle)	Metabolism	Carbohydrate metabolism	18	2.81578e-06	2.969	ACO1;DLAT;DLD;DLST;FH;IDH1;IDH3A;IDH3B;MDH2;OGDH;OGDHL;PC;PDHA1;SDHA;SDHB;SDHC;SDHD;SUCLG2	bom00020
bom04060	Cytokine-cytokine receptor interaction	Environmental Information Processing	Signaling molecules and interaction	88	3.49509e-06	1.5692	ACKR4;ACVR2B;BMP2;BMP3;BMP8B;CCL16;CCL22;CCL24;CCL5;CCR4;CCR7;CCR8;CD27;CD4;CD40LG;CLCF1;CRLF2;CSF1R;CX3CR1;CXCL10;CXCL13;CXCL17;CXCL8;CXCL9;CXCR1;CXCR2;CXCR4;CXCR6;EDA2R;EDAR;EPOR;FASLG;IFNLR1;IL10RB;IL12RB1;IL12RB2;IL17A;IL17B;IL17C;IL17F;IL17RB;IL1A;IL1B;IL1R2;IL1RL1;IL1RL2;IL1RN;IL20RA;IL20RB;IL21R;IL22RA1;IL27RA;IL2RA;IL2RG;IL31RA;IL32;IL36G;IL36RN;IL6;IL7;IL7R;LOC102264498;LOC102269246;LOC1…	bom04060
bom00830	Retinol metabolism	Metabolism	Metabolism of cofactors and vitamins	29	7.78529e-06	2.21838	ADH5;ALDH1A1;ALDH1A2;DHRS9;LOC102264512;LOC102264665;LOC102265968;LOC102266105;LOC102266587;LOC102266920;LOC102268504;LOC102269158;LOC102270081;LOC102270291;LOC102270864;LOC102272258;LOC102274061;LOC102281032;LOC102282243;LOC102282379;LOC102282831;LOC102284246;LOC102284405;LOC102284686;LRAT;RDH10;RETSAT;SDR16C5;UGT2A1	bom00830
bom00982	Drug metabolism - cytochrome P450	Metabolism	Xenobiotics biodegradation and metabolism	25	1.93403e-05	2.27509	ADH5;FMO1;FMO2;FMO3;FMO5;GSTK1;GSTM3;LOC102264665;LOC102264698;LOC102269158;LOC102270291;LOC102270864;LOC102272205;LOC102274807;LOC102276661;LOC102281032;LOC102281969;LOC102282379;LOC102282831;LOC102284246;LOC102287938;LOC102288314;MAOB;MGST3;UGT2A1	bom00982
bom04142	Lysosome	Cellular Processes	Transport and catabolism	46	1.97665e-05	1.7985	ABCA2;ACP5;AP3B2;AP3M2;ARSA;ATP6V0A1;ATP6V0A4;ATP6V0B;ATP6V0C;CD68;CLN3;CLTB;CTNS;CTSA;CTSD;CTSF;CTSH;CTSS;CTSW;CTSZ;DNASE2;FUCA1;GBA;GM2A;GNS;GUSB;HEXA;HEXB;HYAL1;LAMP3;LAPTM5;LGMN;LIPA;LOC102275834;MAN2B1;MANBA;MCOLN1;NAPSA;NPC1;NPC2;PPT2;PSAP;SLC11A1;SMPD1;SORT1;TPP1	bom04142
bom05323	Rheumatoid arthritis	Human Diseases	Immune disease	38	2.23818e-05	1.91021	ACP5;ANGPT1;ATP6V0A1;ATP6V0A4;ATP6V0B;ATP6V0C;ATP6V1A;ATP6V1B1;ATP6V1C2;CCL5;CD28;CXCL8;IL17A;IL1A;IL1B;IL6;ITGAL;ITGB2;LOC102269246;LOC102269342;LOC102271117;LOC102271416;LOC102271676;LOC102271913;LOC102272762;LOC102282432;LOC102282998;LOC102283173;LOC102283463;LOC102285144;LOC102287625;LOC102288330;TGFB2;TGFB3;TLR4;TNF;TNFSF13B;VEGFA	bom05323
bom05415	Diabetic cardiomyopathy	Human Diseases	Cardiovascular disease	64	3.78801e-05	1.60097	AGT;ATP2A1;ATP5A1;ATP5B;ATP5G3;ATP5J;CAMK2A;CAMK2B;COL1A1;COL1A2;COL3A1;CPT1B;CPT2;CTSD;GFPT1;GFPT2;GSR;LOC102266923;LOC102267680;LOC102270480;LOC102270524;LOC102271679;LOC102272636;LOC102273579;LOC102274326;LOC102278351;LOC102279149;LOC102281629;LOC102283287;LOC102286844;LOC102287792;LOC102288244;MAPK13;MMP9;NCF1;NDUFA10;NDUFA11;NDUFA12;NDUFA13;NDUFA8;NDUFA9;NDUFAB1;NDUFB3;NDUFS1;NDUFS2;NDUFS6;N…	bom05415
bom00190	Oxidative phosphorylation	Metabolism	Energy metabolism	48	3.79399e-05	1.7353	ATP12A;ATP5A1;ATP5B;ATP5G3;ATP5I;ATP5J;ATP5J2;ATP6V0A1;ATP6V0A4;ATP6V0B;ATP6V0C;ATP6V1A;ATP6V1B1;ATP6V1C2;LOC102266923;LOC102267680;LOC102270480;LOC102270524;LOC102271679;LOC102272636;LOC102273579;LOC102274326;LOC102277620;LOC102278351;LOC102279149;LOC102281629;LOC102283287;LOC102284305;LOC102286844;LOC102287792;NDUFA10;NDUFA11;NDUFA12;NDUFA13;NDUFA8;NDUFA9;NDUFAB1;NDUFB3;NDUFS1;NDUFS2;NDUFS6;NDU…	bom00190
bom05340	Primary immunodeficiency	Human Diseases	Immune disease	18	4.00469e-05	2.56778	ADA;BLNK;CD3D;CD3E;CD4;CD40LG;CD79A;CD8A;CD8B;CIITA;ICOS;IL2RG;IL7R;LOC102280800;LOC102283173;PTPRC;TAP1;ZAP70	bom05340
bom00640	Propanoate metabolism	Metabolism	Carbohydrate metabolism	16	0.000113087	2.55913	ACADS;ACAT1;ACSS2;ALDH6A1;BCKDHA;BCKDHB;DLD;ECHDC1;ECHS1;HIBCH;LOC102274962;MCEE;MUT;PCCA;PCCB;SUCLG2	bom00640
bom00980	Metabolism of xenobiotics by cytochrome P450	Metabolism	Xenobiotics biodegradation and metabolism	24	0.000218735	2.04318	ADH5;EPHX1;GSTK1;GSTM3;LOC102264665;LOC102264698;LOC102265481;LOC102267279;LOC102269158;LOC102270291;LOC102270864;LOC102272205;LOC102274807;LOC102276661;LOC102279872;LOC102280721;LOC102281969;LOC102282379;LOC102282831;LOC102284246;LOC102287938;LOC102288314;MGST3;UGT2A1	bom00980
bom04145	Phagosome	Cellular Processes	Transport and catabolism	50	0.000225614	1.60921	ATP6V0A1;ATP6V0A4;ATP6V0B;ATP6V0C;ATP6V1A;ATP6V1B1;ATP6V1C2;C3;CD14;COLEC11;COLEC12;COMP;CORO1A;CTSS;DYNC1I1;ITGA5;ITGAM;ITGB1;ITGB2;LOC102268170;LOC102268800;LOC102269342;LOC102270654;LOC102271117;LOC102271676;LOC102273069;LOC102273538;LOC102274112;LOC102275624;LOC102276844;LOC102277577;LOC102281193;LOC102281195;LOC102282432;LOC102282998;LOC102283173;LOC102283463;LOC102285144;LOC102286791;LOC102…	bom04145
