# Supplementary material for: Transcriptome profiling in rumen, reticulum, omasum, and abomasum tissues during the developmental transition of pre-ruminant to the ruminant in yaks
Source: Frontiers journal article supplement (doi:10.3389/fvets.2023.1204706), 2023-09-22
Supplement: Data_Sheet_1.zip [file Table S10-The top 20 mRNAs expressed in reticulum.xls]

id	S0d_Ret	S20d_Ret	S60d_Ret	S15m_Ret	Adult_Ret
LOC102269388	6573.43	7901.95	3578.09	1939.36	2348.34
LOC102287318	14106.9	5800.87	711.829	103.378	148.577
S100A12	3679.89	6270.29	3104.14	4416.75	2599.46
LOC102287882	4401.34	3624.72	3949.82	3561.37	4233.49
KRT4	10818.1	7384.09	1197.71	31.4579	21.0712
S100A9	3445.91	6053.84	2576.51	3526.41	1644.42
LOC102271013	305.452	1636.74	3593.17	5049.13	5936.87
LOC102282154	903.343	1525.29	3143.09	5692.38	5071.25
RPS2	3040.84	2880.83	3567.82	3566.09	3157.91
LOC102266213	319.931	1186.7	3356.43	5346.7	5336.1
KRT6A	710.131	3000.72	2837.97	4235.26	3538.64
ACTG2	4526.53	1827.48	2100.62	1409.25	3192.07
DES	3459.09	1196.97	1721.57	2363.88	4003.81
LOC102268548	706.156	1223.34	2452.97	4175.61	3614.28
A2ML1	1496.09	2019.82	3185.01	2979.93	2288.51
EEF1A1	2179.08	2143.05	2449.8	2284.74	2336.81
RPS8	2302.12	1989.19	2136.7	1883.28	1976.53
FTH1	846.895	1229.11	1513.9	3371.67	2826.7
RPLP0	1769.28	1627.94	2245.72	2118.9	2009.72
LOC102274399	2129.08	2120.13	1702.85	1747.31	1748.34
