# Supplementary material for: Transcriptome profiling in rumen, reticulum, omasum, and abomasum tissues during the developmental transition of pre-ruminant to the ruminant in yaks
Source: Frontiers journal article supplement (doi:10.3389/fvets.2023.1204706), 2023-09-22
Supplement: Data_Sheet_1.zip [file Table S11-The top 20 KEGG enrichment pathways of common DEmRNAs in omasum.xls]

id	Term	Classification_level1	Classification_level2	ListHits	p-value	Enrichment_score	geneID	hyperlink_only_excel
bom04514	Cell adhesion molecules	Environmental Information Processing	Signaling molecules and interaction	65	7.57548417705173e-12	2.28052792041078	ALCAM;CD2;CD22;CD4;CD40LG;CD6;CD86;CD8A;CDH2;CDH3;CDH4;CLDN10;CLDN11;CLDN17;CLDN18;CLDN19;CLDN23;CLDN4;ICOS;IGSF11;ITGA4;ITGAL;ITGAM;ITGB1;ITGB2;ITGB7;ITGB8;JAM3;L1CAM;LOC102268170;LOC102269342;LOC102269592;LOC102269978;LOC102270654;LOC102270832;LOC102271117;LOC102271676;LOC102272326;LOC102272413;LOC102275624;LOC102281193;LOC102282432;LOC102282998;LOC102283463;LOC102285144;LRRC4;LRRC4B;LRRC4C;MPZ…	=HYPERLINK("../../3.KEGG_map/VennData/bom04514.html","bom04514")
bom04640	Hematopoietic cell lineage	Organismal Systems	Immune system	42	1.74789694066158e-08	2.33437130619352	CD14;CD1E;CD2;CD22;CD37;CD3D;CD3E;CD4;CD5;CD59;CD8A;CR2;CSF1R;CSF3R;EPOR;FCER2;FLT3;IL1B;IL1R2;IL2RA;IL6R;IL7R;ITGA1;ITGA4;ITGAM;KIT;LOC102267156;LOC102269342;LOC102269978;LOC102270832;LOC102271117;LOC102271676;LOC102273986;LOC102281126;LOC102282432;LOC102282998;LOC102283173;LOC102283463;LOC102285144;LOC102287338;LOC102288394;TFRC	=HYPERLINK("../../3.KEGG_map/VennData/bom04640.html","bom04640")
bom04360	Axon guidance	Organismal Systems	Development and regeneration	63	4.98134995784156e-08	1.92205028743651	BMP7;BMPR1B;CAMK2A;CAMK2B;CAMK2G;CFL2;DPYSL5;EFNA2;EFNA3;EFNB3;ENAH;EPHA1;EPHA2;EPHA4;EPHA5;EPHA7;EPHB6;FES;ILK;ITGB1;L1CAM;LIMK2;LOC102270098;LOC102275569;LOC102279399;LRRC4;LRRC4C;MYL9;NGEF;NTN4;PARD6B;PIK3CA;PIK3CB;PLCG2;PLXNA4;PLXNB3;PLXNC1;PPP3CC;RHOD;RND1;ROBO1;ROBO2;RRAS;SEMA3A;SEMA3F;SEMA3G;SEMA4A;SEMA4F;SEMA5B;SEMA6D;SEMA7A;SHH;SMO;SRGAP3;TRPC3;TRPC4;UNC5A;UNC5B;UNC5C;UNC5D;WNT4;WNT5A;WN…	=HYPERLINK("../../3.KEGG_map/VennData/bom04360.html","bom04360")
bom05150	Staphylococcus aureus infection	Human Diseases	Infectious disease: bacterial	40	4.70272188773098e-07	2.15907968796287	C1QA;C1QB;C1QC;C2;C3AR1;C5;CFD;DSG1;ITGAL;ITGAM;ITGB2;KRT19;KRT20;KRT24;KRT39;LOC102264699;LOC102267435;LOC102267994;LOC102268264;LOC102268548;LOC102269342;LOC102269388;LOC102269519;LOC102269978;LOC102270832;LOC102271117;LOC102271676;LOC102273069;LOC102273538;LOC102274112;LOC102281124;LOC102282186;LOC102282432;LOC102282998;LOC102283173;LOC102283463;LOC102285144;MASP1;SELP;SELPLG	=HYPERLINK("../../3.KEGG_map/VennData/bom05150.html","bom05150")
bom05340	Primary immunodeficiency	Human Diseases	Immune disease	20	6.62156045476435e-07	3.03438226416404	ADA;BLNK;BTK;CD3D;CD3E;CD4;CD40LG;CD79A;CD8A;ICOS;IL2RG;IL7R;JAK3;LCK;LOC102280800;LOC102283173;PTPRC;TAP1;TNFRSF13C;ZAP70	=HYPERLINK("../../3.KEGG_map/VennData/bom05340.html","bom05340")
bom05146	Amoebiasis	Human Diseases	Infectious disease: parasitic	39	1.0416427600704e-06	2.12554058601393	ACTN1;ARG1;CASP3;CD14;CD1E;COL1A1;COL1A2;COL4A5;COL4A6;CXCL8;FN1;GNA14;GNA15;IL1B;IL1R2;ITGAM;ITGB2;LAMA2;LAMA3;LAMB1;LOC102267156;LOC102267172;LOC102269246;LOC102273986;LOC102277897;LOC102281126;LOC102283173;LOC102286123;LOC102287338;LOC102288394;PIK3CA;PIK3CB;PLCB1;PLCB2;PLCB4;PRKCB;SERPINB10;TGFB2;TLR2	=HYPERLINK("../../3.KEGG_map/VennData/bom05146.html","bom05146")
bom04512	ECM-receptor interaction	Environmental Information Processing	Signaling molecules and interaction	35	1.32034106037496e-06	2.20759833263619	COL1A1;COL1A2;COL2A1;COL4A5;COL4A6;COL6A5;COL6A6;COL9A3;COMP;FN1;FRAS1;FREM1;FREM2;ITGA1;ITGA10;ITGA11;ITGA4;ITGA7;ITGB1;ITGB7;ITGB8;LAMA2;LAMA3;LAMB1;LOC102268494;NPNT;SPP1;SV2B;SV2C;THBS1;THBS4;TNC;TNR;TNXB;VWF	=HYPERLINK("../../3.KEGG_map/VennData/bom04512.html","bom04512")
bom04971	Gastric acid secretion	Organismal Systems	Digestive system	32	2.41384756021185e-06	2.24544287548139	ACTB;ADCY2;ADCY3;ADCY9;ATP1A2;ATP1A3;ATP1B1;ATP1B3;ATP4B;CALML4;CAMK2A;CAMK2B;CAMK2G;CFTR;CHRM3;KCNJ10;KCNJ15;KCNJ2;KCNK10;KCNK2;KCNQ1;LOC102266295;LOC102266781;LOC102286123;MYLK;MYLK3;PLCB1;PLCB2;PLCB4;PRKCB;SLC9A4;SST	=HYPERLINK("../../3.KEGG_map/VennData/bom04971.html","bom04971")
bom04060	Cytokine-cytokine receptor interaction	Environmental Information Processing	Signaling molecules and interaction	84	3.52087455595391e-06	1.59305068868612	ACVR2B;BMP2;BMP6;BMP7;BMP8A;BMP8B;BMPR1B;CCL20;CCL22;CCL24;CCL5;CCR4;CCR6;CCR7;CD27;CD4;CD40LG;CNTFR;CSF1R;CSF2RB;CSF3R;CX3CR1;CXCL17;CXCL8;CXCR1;CXCR2;CXCR6;EDA2R;EDAR;EPOR;GDF11;GDF15;IFNLR1;IL12RB1;IL12RB2;IL13RA1;IL17A;IL17C;IL17D;IL17F;IL17RB;IL1B;IL1R2;IL1RL2;IL1RN;IL20RA;IL21R;IL22RA1;IL27RA;IL2RA;IL2RG;IL32;IL36G;IL36RN;IL6R;IL7R;INHBA;LOC102264498;LOC102267096;LOC102269246;LOC102271445;L…	=HYPERLINK("../../3.KEGG_map/VennData/bom04060.html","bom04060")
bom00100	Steroid biosynthesis	Metabolism	Lipid metabolism	13	3.86778184686358e-06	3.64884467265725	DHCR24;DHCR7;EBP;LIPA;LOC102272075;LOC102278257;LOC102282237;LSS;MSMO1;NSDHL;SOAT1;SQLE;TM7SF2	=HYPERLINK("../../3.KEGG_map/VennData/bom00100.html","bom00100")
bom00590	Arachidonic acid metabolism	Metabolism	Lipid metabolism	33	4.96240155669098e-06	2.15405857240947	ALOX12B;ALOX5;GGT1;GGT5;GPX1;GPX3;GPX7;GPX8;LOC102267155;LOC102268504;LOC102269337;LOC102270081;LOC102271453;LOC102272308;LOC102272527;LOC102272594;LOC102272882;LOC102279786;LOC102279872;LOC102280721;LOC102280731;LOC102282243;LOC102282352;LOC102283454;LOC102284205;LOC102285661;PLA2G4B;PLA2G4D;PLA2G4E;PLA2G4F;PTGIS;PTGS1;TBXAS1	=HYPERLINK("../../3.KEGG_map/VennData/bom00590.html","bom00590")
bom00830	Retinol metabolism	Metabolism	Metabolism of cofactors and vitamins	28	7.34684786473372e-06	2.27798552585068	ALDH1A1;ALDH1A2;ALDH1A3;AOX1;DHRS9;LOC102264665;LOC102265968;LOC102266105;LOC102266587;LOC102266920;LOC102268504;LOC102269158;LOC102270081;LOC102270291;LOC102270864;LOC102272258;LOC102274061;LOC102279786;LOC102280731;LOC102281032;LOC102282243;LOC102282831;LOC102284246;LOC102284686;LOC102284966;LRAT;RETSAT;UGT2A1	=HYPERLINK("../../3.KEGG_map/VennData/bom00830.html","bom00830")
bom04925	Aldosterone synthesis and secretion	Organismal Systems	Endocrine system	36	1.02959629842144e-05	2.02089858793325	ADCY2;ADCY3;ADCY9;AGT;ATP1A2;ATP1A3;ATP1B1;ATP1B3;ATP2B3;ATP2B4;CACNA1C;CACNA1G;CACNA1H;CACNA1S;CALML4;CAMK1D;CAMK2A;CAMK2B;CAMK2G;CREB3;CREB3L1;DAGLA;KCNK9;LOC102266295;LOC102267885;LOC102282116;LOC102286123;NPPA;NR4A1;PLCB1;PLCB2;PLCB4;POMC;PRKCB;PRKD1;SCARB1	=HYPERLINK("../../3.KEGG_map/VennData/bom04925.html","bom04925")
bom04911	Insulin secretion	Organismal Systems	Endocrine system	32	1.910263818383e-05	2.06477505791392	ABCC8;ADCY2;ADCY3;ADCY9;ADCYAP1;ADCYAP1R1;ATP1A2;ATP1A3;ATP1B1;ATP1B3;CACNA1C;CACNA1S;CAMK2A;CAMK2B;CAMK2G;CCKAR;CHRM3;CREB3;CREB3L1;GLP1R;KCNMA1;KCNMB1;KCNN3;LOC102286123;LOC102287707;PCLO;PLCB1;PLCB2;PLCB4;PRKCB;RYR2;SNAP25	=HYPERLINK("../../3.KEGG_map/VennData/bom04911.html","bom04911")
bom04978	Mineral absorption	Organismal Systems	Digestive system	27	3.17782261890349e-05	2.16524848707134	ATP1A2;ATP1A3;ATP1B1;ATP1B3;ATP2B3;ATP2B4;ATP7B;FTH1;HEPH;LOC102268926;LOC102276607;LOC102277920;LOC102278728;LOC102279002;LOC102279288;LOC102279580;SLC26A3;SLC26A9;SLC30A1;SLC31A1;SLC34A3;SLC39A4;SLC40A1;SLC5A1;SLC8A1;SLC9A3;TRPM6	=HYPERLINK("../../3.KEGG_map/VennData/bom04978.html","bom04978")
bom00982	Drug metabolism - cytochrome P450	Metabolism	Xenobiotics biodegradation and metabolism	23	7.28987479355462e-05	2.22608560931344	AOX1;FMO1;FMO2;FMO3;FMO5;LOC102264665;LOC102264698;LOC102267436;LOC102269158;LOC102270291;LOC102270864;LOC102272205;LOC102274807;LOC102276933;LOC102281032;LOC102281969;LOC102282831;LOC102283655;LOC102284246;LOC102287938;MAOA;MGST3;UGT2A1	=HYPERLINK("../../3.KEGG_map/VennData/bom00982.html","bom00982")
bom04913	Ovarian steroidogenesis	Organismal Systems	Endocrine system	24	8.07228187486383e-05	2.17300923433683	ADCY2;ADCY3;ADCY9;ALOX5;BMP6;HSD17B2;IGF1;LOC102267155;LOC102269337;LOC102271453;LOC102272308;LOC102272594;LOC102272882;LOC102282116;LOC102283377;LOC102283454;LOC102284205;LOC102286123;LOC102286944;PLA2G4B;PLA2G4D;PLA2G4E;PLA2G4F;SCARB1	=HYPERLINK("../../3.KEGG_map/VennData/bom04913.html","bom04913")
bom03320	PPAR signaling pathway	Organismal Systems	Endocrine system	29	8.19210886383332e-05	2.00980998114075	ACOX2;ACSBG1;ACSL5;ACSL6;APOA1;AQP7;CPT1B;CPT2;EHHADH;FABP3;FABP7;GK;HMGCS2;ILK;LOC102268504;LOC102270081;LOC102283568;LPL;ME1;ME3;PLIN4;PLTP;PPARD;PPARG;RXRG;SCD;SLC27A2;SLC27A4;SORBS1	=HYPERLINK("../../3.KEGG_map/VennData/bom03320.html","bom03320")
bom04970	Salivary secretion	Organismal Systems	Digestive system	33	8.73010724469411e-05	1.90978388894035	ADCY2;ADCY3;ADCY9;AQP5;ATP1A2;ATP1A3;ATP1B1;ATP1B3;ATP2B3;ATP2B4;BEST2;BST1;CALML4;CHRM3;GUCY1A3;KCNMA1;LOC102266295;LOC102269132;LOC102269519;LOC102270503;LOC102272875;LOC102279966;LOC102283503;LOC102285929;LOC102286123;LPO;MUC5B;NOS1;PLCB1;PLCB2;PLCB4;PRKCB;SLC12A2	=HYPERLINK("../../3.KEGG_map/VennData/bom04970.html","bom04970")
bom05414	Dilated cardiomyopathy	Human Diseases	Cardiovascular disease	33	8.73010724469411e-05	1.90978388894035	ACTB;ACTC1;ADCY2;ADCY3;ADCY9;AGT;ATP2A1;ATP2A3;CACNA1C;CACNA1S;CACNG7;DES;DMD;IGF1;ITGA1;ITGA10;ITGA11;ITGA4;ITGA7;ITGB1;ITGB7;ITGB8;LAMA2;LOC102283173;LOC102286123;MYL2;PLN;RYR2;SLC8A1;TGFB2;TPM1;TPM2;TTN	=HYPERLINK("../../3.KEGG_map/VennData/bom05414.html","bom05414")
