# Supplementary material for: Transcriptome profiling in rumen, reticulum, omasum, and abomasum tissues during the developmental transition of pre-ruminant to the ruminant in yaks
Source: Frontiers journal article supplement (doi:10.3389/fvets.2023.1204706), 2023-09-22
Supplement: Data_Sheet_1.zip [file Table S12-The top 20 mRNAs expressed in omasum.xls]

id	S0d_Oma	S20d_Oma	S60d_Oma	S15m_Oma	Adult_Oma
LOC102269388	11053.8	10132.5	6269.49	2698.7	2221.32
KRT4	18184.2	8617.94	3108.89	19.9404	9.93535
LOC102287318	17516.3	5114.77	3073.21	168.116	54.808
S100A12	5540.12	9077.58	4798.55	3471.62	1405.48
S100A9	4898.49	9512.59	5452.23	2275.1	545.901
LOC102287882	5391.47	3599.46	3864.41	3668.81	3891.92
LOC102282154	953.145	2871.39	4161.21	6421.42	4576.27
RPS2	3943.15	3312.67	3525.69	3512.92	3069.34
KRT6A	532.872	3420.37	4513.6	4909.25	3495.28
LOC102266213	1005.44	1955.02	2899.76	5534.46	5051.0
DES	948.609	642.43	1162.1	3726.9	8940.86
LOC102268548	712.699	2213.96	3302.14	5100.71	3482.95
A2ML1	2719.3	3288.67	3127.51	3494.67	1883.51
LOC102271013	322.223	2034.87	2773.12	3950.48	3038.39
EEF1A1	2823.5	2233.7	2346.46	2364.19	2228.85
RPS8	3050.45	2127.54	2236.31	2055.44	1934.34
ACTG2	1050.92	605.928	1163.12	2330.22	6014.09
RPLP0	2343.42	1902.55	2098.65	2305.37	2009.76
RPS3A	2875.5	1959.4	2076.26	1891.53	1747.67
ANXA1	2193.86	3259.7	1746.65	1890.87	1438.12
