# Supplementary material for: Transcriptome profiling in rumen, reticulum, omasum, and abomasum tissues during the developmental transition of pre-ruminant to the ruminant in yaks
Source: Frontiers journal article supplement (doi:10.3389/fvets.2023.1204706), 2023-09-22
Supplement: Data_Sheet_1.zip [file Table S13-The KEGG enrichment pathways in seven comparison groups in abomasum.xlsx]

## Sheet: Table S13
id	Term			ListHits	pValue	Enrichment_score	Gene	class	group
bom04514	Cell adhesion molecules	Environmental Information Processing	Signaling molecules and interaction	24	2.19818e-12	5.80487	CD2;CD4;CD6;CLDN1;CLDN4;ICOS;ITGA8;ITGAL;ITGAM;ITGB2;LOC102268170;LOC102269342;LOC102271117;LOC102271676;LOC102272326;LOC102278231;LOC102281193;LOC102283463;LOC102285144;LRRC4;PTPRC;SELPLG;SIGLEC1;SPN	Abomasum	G20d_G0d_up
bom04640	Hematopoietic cell lineage	Organismal Systems	Immune system	19	8.00198e-12	7.28003	CD2;CD37;CD3E;CD4;CD7;CR2;CSF1R;EPOR;FLT3;IL6R;ITGAM;LOC102266138;LOC102269342;LOC102271117;LOC102271676;LOC102283173;LOC102283463;LOC102285144;LOC102288394	Abomasum	G20d_G0d_up
bom05169	Epstein-Barr virus infection	Human Diseases	Infectious disease: viral	26	7.32429e-11	4.55284	B2M;BTK;CD247;CD3E;CR2;DDX58;ENTPD1;IKBKE;IRF7;ISG15;ITGAL;LOC102268170;LOC102269342;LOC102271117;LOC102271676;LOC102272326;LOC102278231;LOC102281193;LOC102283173;LOC102283231;LOC102283463;LOC102283513;LOC102285144;OAS2;PIK3CD;TRAF5	Abomasum	G20d_G0d_up
bom05150	Staphylococcus aureus infection	Human Diseases	Infectious disease: bacterial	18	1.2441e-10	6.69792	C1QA;C1QB;C1QC;C3;C3AR1;CFI;ITGAL;ITGAM;ITGB2;KRT20;LOC102269342;LOC102271117;LOC102271676;LOC102273538;LOC102283173;LOC102283463;LOC102285144;SELPLG	Abomasum	G20d_G0d_up
bom04145	Phagosome	Cellular Processes	Transport and catabolism	22	1.80963e-10	5.19134	C3;CORO1A;DYNC1I1;ITGAM;ITGB2;LOC102266138;LOC102268170;LOC102269342;LOC102271117;LOC102271676;LOC102272326;LOC102273538;LOC102278231;LOC102281193;LOC102283173;LOC102283463;LOC102285144;LOC102288244;MSR1;NCF1;PLA2R1;RILP	Abomasum	G20d_G0d_up
bom05330	Allograft rejection	Human Diseases	Immune disease	12	1.08932e-08	8.44344	LOC102268170;LOC102269342;LOC102271117;LOC102271676;LOC102272326;LOC102278231;LOC102281193;LOC102283173;LOC102283463;LOC102285144;LOC102285463;PRF1	Abomasum	G20d_G0d_up
bom05320	Autoimmune thyroid disease	Human Diseases	Immune disease	12	6.63975e-08	7.25608	LOC102268170;LOC102269342;LOC102271117;LOC102271676;LOC102272326;LOC102278231;LOC102281193;LOC102283173;LOC102283463;LOC102285144;LOC102285463;PRF1	Abomasum	G20d_G0d_up
bom04650	Natural killer cell mediated cytotoxicity	Organismal Systems	Immune system	17	7.54095e-08	4.80208	CD247;CD48;ITGAL;ITGB2;LOC102268170;LOC102272326;LOC102273538;LOC102278231;LOC102281193;LOC102283173;LOC102285463;PIK3CD;PRF1;TNFSF10;VAV1;VAV3;ZAP70	Abomasum	G20d_G0d_up
bom05416	Viral myocarditis	Human Diseases	Cardiovascular disease	13	9.46933e-08	6.36821	ITGAL;ITGB2;LOC102268170;LOC102269342;LOC102271117;LOC102271676;LOC102272326;LOC102278231;LOC102281193;LOC102283173;LOC102283463;LOC102285144;PRF1	Abomasum	G20d_G0d_up
bom04940	Type I diabetes mellitus	Human Diseases	Endocrine and metabolic disease	11	3.0248e-07	7.09484	LOC102268170;LOC102269342;LOC102271117;LOC102271676;LOC102272326;LOC102278231;LOC102281193;LOC102283463;LOC102285144;LOC102285463;PRF1	Abomasum	G20d_G0d_up
bom05164	Influenza A	Human Diseases	Infectious disease: viral	18	3.56623e-07	4.09755	CCL5;DDX58;IFIH1;IKBKE;IRF7;LOC102269342;LOC102271117;LOC102271676;LOC102283231;LOC102283463;LOC102283513;LOC102285144;MX2;OAS2;PIK3CD;RSAD2;TLR7;TNFSF10	Abomasum	G20d_G0d_up
bom04659	Th17 cell differentiation	Organismal Systems	Immune system	15	5.09912e-07	4.75809	CD247;CD3E;CD4;IL12RB1;IL21R;IL6R;IRF4;LOC102269342;LOC102271117;LOC102271676;LOC102283463;LOC102285144;LOC102285579;PRKCQ;ZAP70	Abomasum	G20d_G0d_up
bom05140	Leishmaniasis	Human Diseases	Infectious disease: parasitic	12	5.52275e-07	6.03103	C3;ITGAM;ITGB2;LOC102269342;LOC102271117;LOC102271676;LOC102273538;LOC102283173;LOC102283463;LOC102285144;LOC102288244;NCF1	Abomasum	G20d_G0d_up
bom05332	Graft-versus-host disease	Human Diseases	Immune disease	11	8.27132e-07	6.44985	LOC102268170;LOC102269342;LOC102271117;LOC102271676;LOC102272326;LOC102278231;LOC102281193;LOC102283463;LOC102285144;LOC102285463;PRF1	Abomasum	G20d_G0d_up
bom04062	Chemokine signaling pathway	Organismal Systems	Immune system	18	1.15664e-06	3.78578	CCL16;CCL20;CCL5;CXCR3;CXCR6;DOCK2;ITK;LOC102264498;LOC102271445;LOC102287450;LOC102288304;NCF1;PIK3CD;PIK3R6;PLCB2;VAV1;VAV3;XCR1	Abomasum	G20d_G0d_up
bom04061	Viral protein interaction with cytokine and cytokine receptor	Environmental Information Processing	Signaling molecules and interaction	12	1.64754e-06	5.4634	CCL16;CCL20;CCL5;CSF1R;CXCR3;IL6R;LOC102264498;LOC102271445;LOC102287450;LOC102288304;TNFSF10;XCR1	Abomasum	G20d_G0d_up
bom04670	Leukocyte transendothelial migration	Organismal Systems	Immune system	14	2.11492e-06	4.55284	CLDN1;CLDN4;ITGAL;ITGAM;ITGB2;ITK;LOC102264794;LOC102288244;NCF1;PIK3CD;RAPGEF3;RASSF5;VAV1;VAV3	Abomasum	G20d_G0d_up
bom04658	Th1 and Th2 cell differentiation	Organismal Systems	Immune system	13	2.47855e-06	4.83739	CD247;CD3E;CD4;IL12RB1;LOC102269342;LOC102271117;LOC102271676;LOC102283463;LOC102285144;MAF;NOTCH3;PRKCQ;ZAP70	Abomasum	G20d_G0d_up
bom04610	Complement and coagulation cascades	Organismal Systems	Immune system	12	2.71355e-06	5.21786	C1QA;C1QB;C1QC;C3;C3AR1;C4BPA;CFI;CR2;ITGAM;ITGB2;KNG1;VSIG4	Abomasum	G20d_G0d_up
bom04612	Antigen processing and presentation	Organismal Systems	Immune system	12	3.44595e-06	5.10318	B2M;CD4;CD74;LOC102268170;LOC102269342;LOC102271117;LOC102271676;LOC102272326;LOC102278231;LOC102281193;LOC102283463;LOC102285144	Abomasum	G20d_G0d_up
bom04141	Protein processing in endoplasmic reticulum	Genetic Information Processing	Folding, sorting and degradation	9	0.000249126	4.26773	CALR;DNAJA1;DNAJB11;HSPA5;HYOU1;PDIA4;PREB;SEC23B;SEC61G	Abomasum	G20d_G0d_down
bom05012	Parkinson disease	Human Diseases	Neurodegenerative disease	11	0.000306166	3.47741	HSPA5;LOC102265694;LOC102265796;LOC102270387;LOC102270684;LOC102270959;LOC102273697;LOC102277620;SLC25A5;TUBA4A;TUBB4B	Abomasum	G20d_G0d_down
bom03008	Ribosome biogenesis in eukaryotes	Genetic Information Processing	Translation	6	0.000427406	6.11181	FBL;GAR1;GNL3;NHP2;NOL6;POP1	Abomasum	G20d_G0d_down
bom05020	Prion disease	Human Diseases	Neurodegenerative disease	11	0.000477705	3.30038	CACNA1S;HSPA5;LOC102265796;LOC102270387;LOC102270684;LOC102270959;LOC102273697;LOC102277620;SLC25A5;TUBA4A;TUBB4B	Abomasum	G20d_G0d_down
bom00480	Glutathione metabolism	Metabolism	Metabolism of other amino acids	5	0.000825665	6.76307	CHAC1;GPX2;LOC102287938;ODC1;SRM	Abomasum	G20d_G0d_down
bom04145	Phagosome	Cellular Processes	Transport and catabolism	7	0.00369496	3.52174	CALR;LOC102270684;LOC102270959;LOC102273697;SEC61G;TUBA4A;TUBB4B	Abomasum	G20d_G0d_down
bom05016	Huntington disease	Human Diseases	Neurodegenerative disease	10	0.00425015	2.66159	GPX2;LOC102265796;LOC102270387;LOC102270684;LOC102270959;LOC102273697;LOC102277620;SLC25A5;TUBA4A;TUBB4B	Abomasum	G20d_G0d_down
bom04540	Gap junction	Cellular Processes	Cellular community - eukaryotes	5	0.00441059	4.63536	LOC102270684;LOC102270959;LOC102273697;TUBA4A;TUBB4B	Abomasum	G20d_G0d_down
bom05022	Pathways of neurodegeneration - multiple diseases	Human Diseases	Neurodegenerative disease	13	0.00561379	2.21159	CACNA1S;GPX2;HSPA5;LOC102265796;LOC102270387;LOC102270684;LOC102270959;LOC102273697;LOC102277620;PTGS2;SLC25A5;TUBA4A;TUBB4B	Abomasum	G20d_G0d_down
bom05010	Alzheimer disease	Human Diseases	Neurodegenerative disease	11	0.0058174	2.40744	CACNA1S;LOC102265796;LOC102270387;LOC102270684;LOC102270959;LOC102273697;LOC102277620;PTGS2;SLC25A5;TUBA4A;TUBB4B	Abomasum	G20d_G0d_down
bom05014	Amyotrophic lateral sclerosis	Human Diseases	Neurodegenerative disease	11	0.0060481	2.39473	ALYREF;GPX2;HSPA5;LOC102265796;LOC102270387;LOC102270684;LOC102270959;LOC102273697;LOC102277620;TUBA4A;TUBB4B	Abomasum	G20d_G0d_down
bom00051	Fructose and mannose metabolism	Metabolism	Carbohydrate metabolism	3	0.008547	7.07224	GMPPB;HK2;PFKL	Abomasum	G20d_G0d_down
bom05230	Central carbon metabolism in cancer	Human Diseases	Cancer: overview	4	0.0101329	4.71482	HK2;PFKL;SLC16A3;SLC7A5	Abomasum	G20d_G0d_down
bom04657	IL-17 signaling pathway	Organismal Systems	Immune system	4	0.0210572	3.79354	LOC102268679;LOC102271913;MUC5B;PTGS2	Abomasum	G20d_G0d_down
bom00520	Amino sugar and nucleotide sugar metabolism	Metabolism	Carbohydrate metabolism	3	0.0248984	4.76016	GMPPB;HK2;UGDH	Abomasum	G20d_G0d_down
bom04210	Apoptosis	Cellular Processes	Cell growth and death	5	0.0252232	3.01129	LOC102270684;LOC102270959;LOC102273697;LOC102277620;TUBA4A	Abomasum	G20d_G0d_down
bom03060	Protein export	Genetic Information Processing	Folding, sorting and degradation	2	0.0311973	7.17473	HSPA5;SEC61G	Abomasum	G20d_G0d_down
bom05132	Salmonella infection	Human Diseases	Infectious disease: bacterial	7	0.0356243	2.25612	LOC102265694;LOC102270684;LOC102270959;LOC102273697;LOC102277620;TUBA4A;TUBB4B	Abomasum	G20d_G0d_down
bom05204	Chemical carcinogenesis - DNA adducts	Human Diseases	Cancer: overview	3	0.0359835	4.12547	LOC102280731;LOC102287938;PTGS2	Abomasum	G20d_G0d_down
bom04668	TNF signaling pathway	Environmental Information Processing	Signal transduction	4	0.0481189	2.92069	LOC102268679;LOC102271913;PTGS2;SOCS3	Abomasum	G20d_G0d_down
bom04612	Antigen processing and presentation	Organismal Systems	Immune system	30	8.27627e-18	6.8163	B2M;CD4;CD74;CD8A;CD8B;CIITA;CTSS;HSPA6;LOC102268170;LOC102269342;LOC102270654;LOC102271117;LOC102271676;LOC102272326;LOC102275624;LOC102275967;LOC102277245;LOC102278231;LOC102279719;LOC102280334;LOC102281193;LOC102282150;LOC102282998;LOC102283463;LOC102284891;LOC102285144;LOC102286220;TAP1;TAP2;TNF	Abomasum	G60d_G0d_up
bom04650	Natural killer cell mediated cytotoxicity	Organismal Systems	Immune system	36	1.65175e-17	5.43314	CD244;CD247;CD48;FASLG;ITGAL;ITGB2;LAT;LCK;LCP2;LOC102268126;LOC102268170;LOC102270654;LOC102272326;LOC102273538;LOC102275624;LOC102275967;LOC102277245;LOC102277959;LOC102278231;LOC102279719;LOC102280334;LOC102281193;LOC102283173;LOC102284891;LOC102285170;LOC102285463;LOC102286220;LOC102286507;PIK3CD;PRF1;SH2D1A;TNF;TNFSF10;VAV1;VAV3;ZAP70	Abomasum	G60d_G0d_up
bom04640	Hematopoietic cell lineage	Organismal Systems	Immune system	30	2.20039e-16	6.14142	CD1E;CD2;CD22;CD37;CD3E;CD3G;CD4;CD5;CD7;CD8A;CD8B;CR2;FLT3;IL2RA;IL7;ITGA3;ITGA4;ITGA6;LOC102268126;LOC102269342;LOC102271117;LOC102271676;LOC102282150;LOC102282998;LOC102283173;LOC102283463;LOC102285144;LOC102288394;MS4A1;TNF	Abomasum	G60d_G0d_up
bom05340	Primary immunodeficiency	Human Diseases	Immune disease	19	5.39696e-16	10.6175	BLNK;BTK;CD3E;CD4;CD79A;CD8A;CD8B;CIITA;ICOS;IL2RG;JAK3;LCK;LOC102268126;LOC102280800;LOC102283173;PTPRC;TAP1;TAP2;ZAP70	Abomasum	G60d_G0d_up
bom05332	Graft-versus-host disease	Human Diseases	Immune disease	24	1.34723e-15	7.51859	CD80;FASLG;LOC102268170;LOC102269342;LOC102270654;LOC102271117;LOC102271676;LOC102272326;LOC102275624;LOC102275967;LOC102277245;LOC102278231;LOC102279719;LOC102280334;LOC102281193;LOC102282150;LOC102282998;LOC102283463;LOC102284891;LOC102285144;LOC102285463;LOC102286220;PRF1;TNF	Abomasum	G60d_G0d_up
bom05169	Epstein-Barr virus infection	Human Diseases	Infectious disease: viral	43	1.77609e-15	4.02296	B2M;BCL2L11;BLNK;BTK;CD247;CD3E;CD3G;CR2;CXCL10;DDX58;EIF2AK2;IKBKE;IRF7;IRF9;ISG15;ITGAL;JAK3;LOC102268126;LOC102268170;LOC102269342;LOC102270654;LOC102271117;LOC102271676;LOC102272326;LOC102272934;LOC102275624;LOC102278231;LOC102281193;LOC102282150;LOC102282998;LOC102283173;LOC102283231;LOC102283463;LOC102283513;LOC102285144;LOC102286220;OAS2;PIK3CD;STAT1;STAT2;TAP1;TAP2;TNF	Abomasum	G60d_G0d_up
bom04514	Cell adhesion molecules	Environmental Information Processing	Signaling molecules and interaction	35	2.1382e-14	4.5229	CD2;CD22;CD274;CD4;CD6;CD80;CD8A;CD8B;CLDN4;ICOS;ITGA4;ITGA6;ITGAL;ITGB2;LOC102268170;LOC102269342;LOC102270654;LOC102271117;LOC102271676;LOC102272326;LOC102275624;LOC102278231;LOC102281193;LOC102282150;LOC102282998;LOC102283463;LOC102285144;LOC102286220;PDCD1LG2;PTPRC;SELL;SELPLG;SIGLEC1;SPN;TIGIT	Abomasum	G60d_G0d_up
bom05330	Allograft rejection	Human Diseases	Immune disease	21	2.67512e-14	7.89452	CD80;FASLG;LOC102268126;LOC102268170;LOC102269342;LOC102270654;LOC102271117;LOC102271676;LOC102272326;LOC102275624;LOC102278231;LOC102281193;LOC102282150;LOC102282998;LOC102283173;LOC102283463;LOC102285144;LOC102285463;LOC102286220;PRF1;TNF	Abomasum	G60d_G0d_up
bom05164	Influenza A	Human Diseases	Infectious disease: viral	33	4.22929e-12	4.0136	ADAR;CCL5;CIITA;CXCL10;DDX58;EIF2AK2;FASLG;IFIH1;IKBKE;IRF7;IRF9;LOC102269342;LOC102271117;LOC102271676;LOC102282150;LOC102282998;LOC102283231;LOC102283463;LOC102283513;LOC102285144;MX1;MX2;OAS2;PIK3CD;PML;RSAD2;STAT1;STAT2;TLR3;TLR7;TNF;TNFSF10;TRIM25	Abomasum	G60d_G0d_up
bom05320	Autoimmune thyroid disease	Human Diseases	Immune disease	20	8.61198e-12	6.46129	CD80;FASLG;LOC102268126;LOC102268170;LOC102269342;LOC102270654;LOC102271117;LOC102271676;LOC102272326;LOC102275624;LOC102278231;LOC102281193;LOC102282150;LOC102282998;LOC102283173;LOC102283463;LOC102285144;LOC102285463;LOC102286220;PRF1	Abomasum	G60d_G0d_up
bom04658	Th1 and Th2 cell differentiation	Organismal Systems	Immune system	25	1.38929e-11	4.97022	CD247;CD3E;CD3G;CD4;IL12RB1;IL2RA;IL2RG;JAK3;LAT;LCK;LOC102269342;LOC102271117;LOC102271676;LOC102272934;LOC102282150;LOC102282998;LOC102283463;LOC102284639;LOC102285144;LOC106700824;PRKCQ;STAT1;STAT4;TBX21;ZAP70	Abomasum	G60d_G0d_up
bom04659	Th17 cell differentiation	Organismal Systems	Immune system	27	1.67245e-11	4.57586	CD247;CD3E;CD3G;CD4;IL12RB1;IL21R;IL2RA;IL2RG;IRF4;JAK3;LAT;LCK;LOC102269342;LOC102271117;LOC102271676;LOC102282150;LOC102282998;LOC102283463;LOC102284639;LOC102285144;LOC102285579;LOC106700824;PRKCQ;RUNX1;STAT1;TBX21;ZAP70	Abomasum	G60d_G0d_up
bom04940	Type I diabetes mellitus	Human Diseases	Endocrine and metabolic disease	19	2.22048e-11	6.54744	CD80;FASLG;LOC102268170;LOC102269342;LOC102270654;LOC102271117;LOC102271676;LOC102272326;LOC102275624;LOC102278231;LOC102281193;LOC102282150;LOC102282998;LOC102283463;LOC102285144;LOC102285463;LOC102286220;PRF1;TNF	Abomasum	G60d_G0d_up
bom05162	Measles	Human Diseases	Infectious disease: viral	28	3.00111e-10	3.93831	ADAR;CD3E;CD3G;DDX58;EIF2AK2;FASLG;HSPA6;IFIH1;IKBKE;IL2RA;IL2RG;IRF7;IRF9;JAK3;LOC102273069;LOC102283231;LOC102283513;LOC102284639;LOC106700824;MX1;MX2;OAS2;PIK3CD;SLAMF1;STAT1;STAT2;TLR7;TP73	Abomasum	G60d_G0d_up
bom05416	Viral myocarditis	Human Diseases	Cardiovascular disease	20	5.92912e-10	5.23446	CD80;ITGAL;ITGB2;LOC102268126;LOC102268170;LOC102269342;LOC102270654;LOC102271117;LOC102271676;LOC102272326;LOC102275624;LOC102278231;LOC102281193;LOC102282150;LOC102282998;LOC102283173;LOC102283463;LOC102285144;LOC102286220;PRF1	Abomasum	G60d_G0d_up
bom04145	Phagosome	Cellular Processes	Transport and catabolism	28	4.05037e-09	3.53007	CORO1A;CTSS;DYNC1I1;FCAR;ITGB2;LOC102268126;LOC102268170;LOC102269342;LOC102270654;LOC102271117;LOC102271676;LOC102272326;LOC102273069;LOC102273538;LOC102274112;LOC102275624;LOC102278231;LOC102281193;LOC102282150;LOC102282998;LOC102283173;LOC102283463;LOC102285144;LOC102286220;LOC102288244;NCF1;TAP1;TAP2	Abomasum	G60d_G0d_up
bom04061	Viral protein interaction with cytokine and cytokine receptor	Environmental Information Processing	Signaling molecules and interaction	19	1.50275e-08	4.62172	CCL16;CCL20;CCL22;CCL5;CCR7;CX3CR1;CXCL10;CXCL11;CXCR3;IL22RA1;IL2RA;IL2RG;LOC102264498;LOC102284639;LOC102285534;LOC106700824;TNF;TNFSF10;XCR1	Abomasum	G60d_G0d_up
bom04062	Chemokine signaling pathway	Organismal Systems	Immune system	28	5.46706e-08	3.14637	CCL16;CCL20;CCL22;CCL5;CCR7;CX3CR1;CXCL10;CXCL11;CXCR3;CXCR6;DOCK2;ITK;JAK3;LOC102264498;LOC102285534;NCF1;PIK3CD;PIK3CG;PIK3R5;PIK3R6;PLCB2;STAT1;STAT2;TIAM1;VAV1;VAV3;WAS;XCR1	Abomasum	G60d_G0d_up
bom05150	Staphylococcus aureus infection	Human Diseases	Infectious disease: bacterial	20	9.28719e-08	3.97618	C2;C3AR1;CFI;FCAR;ITGAL;ITGB2;KRT20;LOC102268126;LOC102269342;LOC102271117;LOC102271676;LOC102273069;LOC102273538;LOC102274112;LOC102282150;LOC102282998;LOC102283173;LOC102283463;LOC102285144;SELPLG	Abomasum	G60d_G0d_up
bom05140	Leishmaniasis	Human Diseases	Infectious disease: parasitic	17	1.05713e-07	4.56486	ITGA4;ITGB2;LOC102268126;LOC102269342;LOC102271117;LOC102271676;LOC102273538;LOC102274112;LOC102282150;LOC102282998;LOC102283173;LOC102283463;LOC102285144;LOC102288244;NCF1;STAT1;TNF	Abomasum	G60d_G0d_up
bom00480	Glutathione metabolism	Metabolism	Metabolism of other amino acids	9	3.13969e-07	9.6298	CHAC1;GPX1;GPX4;GPX7;GPX8;LOC102274807;LOC102287938;ODC1;SRM	Abomasum	G60d_G0d_down
bom05204	Chemical carcinogenesis - DNA adducts	Human Diseases	Cancer: overview	7	3.3269e-05	7.61468	LOC102273409;LOC102274807;LOC102280731;LOC102282831;LOC102283377;LOC102287938;PTGS2	Abomasum	G60d_G0d_down
bom00240	Pyrimidine metabolism	Metabolism	Nucleotide metabolism	5	0.00135718	6.04339	CTPS1;ENTPD3;LOC102267804;LOC102270686;NT5C2	Abomasum	G60d_G0d_down
bom00051	Fructose and mannose metabolism	Metabolism	Carbohydrate metabolism	4	0.0019088	7.45928	AKR1B1;GMPPA;HK2;PFKL	Abomasum	G60d_G0d_down
bom00590	Arachidonic acid metabolism	Metabolism	Lipid metabolism	6	0.00199433	4.55363	GPX1;GPX7;GPX8;LOC102280731;PTGES;PTGS2	Abomasum	G60d_G0d_down
bom00250	Alanine, aspartate and glutamate metabolism	Metabolism	Amino acid metabolism	4	0.00314082	6.52687	ASNS;ASS1;GFPT2;GPT2	Abomasum	G60d_G0d_down
bom04927	Cortisol synthesis and secretion	Organismal Systems	Endocrine system	5	0.00331374	4.9446	AGT;CACNA1S;CREB3L3;LOC102282116;NR4A1	Abomasum	G60d_G0d_down
bom00040	Pentose and glucuronate interconversions	Metabolism	Carbohydrate metabolism	3	0.00786166	7.25207	AKR1B1;LOC102282831;UGDH	Abomasum	G60d_G0d_down
bom00520	Amino sugar and nucleotide sugar metabolism	Metabolism	Carbohydrate metabolism	4	0.0080806	5.02067	GFPT2;GMPPA;HK2;UGDH	Abomasum	G60d_G0d_down
bom04216	Ferroptosis	Cellular Processes	Cell growth and death	4	0.0118053	4.50129	CP;GPX4;LOC102273670;SLC7A11	Abomasum	G60d_G0d_down
bom00052	Galactose metabolism	Metabolism	Carbohydrate metabolism	3	0.0126118	6.11894	AKR1B1;HK2;PFKL	Abomasum	G60d_G0d_down
bom05410	Hypertrophic cardiomyopathy	Human Diseases	Cardiovascular disease	5	0.0127413	3.58619	AGT;CACNA1S;ITGA11;ITGA2;LOC102273543	Abomasum	G60d_G0d_down
bom00980	Metabolism of xenobiotics by cytochrome P450	Metabolism	Xenobiotics biodegradation and metabolism	4	0.0148143	4.21088	LOC102274807;LOC102282831;LOC102283377;LOC102287938	Abomasum	G60d_G0d_down
bom04925	Aldosterone synthesis and secretion	Organismal Systems	Endocrine system	5	0.0185107	3.26343	AGT;CACNA1S;CREB3L3;LOC102282116;NR4A1	Abomasum	G60d_G0d_down
bom00760	Nicotinate and nicotinamide metabolism	Metabolism	Metabolism of cofactors and vitamins	3	0.0186943	5.29205	LOC102267804;LOC102270686;NT5C2	Abomasum	G60d_G0d_down
bom04960	Aldosterone-regulated sodium reabsorption	Organismal Systems	Excretory system	3	0.0186943	5.29205	SCNN1A;SCNN1B;SCNN1G	Abomasum	G60d_G0d_down
bom04978	Mineral absorption	Organismal Systems	Digestive system	4	0.0221857	3.72964	LOC102273670;LOC102278728;LOC102279580;STEAP1	Abomasum	G60d_G0d_down
bom00140	Steroid hormone biosynthesis	Metabolism	Lipid metabolism	4	0.023239	3.67711	LOC102280731;LOC102282116;LOC102282831;LOC102283377	Abomasum	G60d_G0d_down
bom00983	Drug metabolism - other enzymes	Metabolism	Xenobiotics biodegradation and metabolism	4	0.023239	3.67711	HPRT1;LOC102274807;LOC102282831;LOC102287938	Abomasum	G60d_G0d_down
bom05418	Fluid shear stress and atherosclerosis	Human Diseases	Cardiovascular disease	6	0.0267674	2.62827	ASS1;IL1R2;LOC102269419;LOC102274807;LOC102287938;RAC3	Abomasum	G60d_G0d_down
bom04640	Hematopoietic cell lineage	Organismal Systems	Immune system	32	1.44911e-17	6.17151	CD1E;CD2;CD22;CD37;CD38;CD3E;CD3G;CD4;CD5;CD59;CD7;CD8A;CD8B;CR2;CSF1R;CSF3R;EPOR;FLT3;IL2RA;IL7;IL7R;ITGA4;LOC102266138;LOC102269342;LOC102271117;LOC102271676;LOC102282998;LOC102283173;LOC102283463;LOC102285144;LOC102288394;MS4A1	Abomasum	G15m_G0d_up
bom05340	Primary immunodeficiency	Human Diseases	Immune disease	18	3.14472e-14	9.47619	BLNK;BTK;CD3E;CD4;CD79A;CD8A;CD8B;CIITA;ICOS;IL2RG;IL7R;JAK3;LOC102280800;LOC102283173;PTPRC;TAP1;TAP2;ZAP70	Abomasum	G15m_G0d_up
bom04514	Cell adhesion molecules	Environmental Information Processing	Signaling molecules and interaction	33	3.76e-12	4.01751	CD2;CD22;CD274;CD4;CD6;CD8A;CD8B;CLDN2;CLDN4;ICOS;ITGA4;ITGAL;ITGB2;LOC102268170;LOC102269342;LOC102270654;LOC102271117;LOC102271676;LOC102272326;LOC102275624;LOC102278231;LOC102281193;LOC102282998;LOC102283463;LOC102285144;LOC102286220;PDCD1LG2;PTPRC;SELL;SELPLG;SIGLEC1;SPN;TIGIT	Abomasum	G15m_G0d_up
bom04650	Natural killer cell mediated cytotoxicity	Organismal Systems	Immune system	30	7.44682e-12	4.26544	CD244;CD247;CD48;FASLG;ITGAL;ITGB2;LAT;LCP2;LOC102268170;LOC102270654;LOC102272326;LOC102273538;LOC102275624;LOC102278231;LOC102279719;LOC102280334;LOC102281193;LOC102283173;LOC102285170;LOC102285463;LOC102286220;LOC102286507;PIK3CD;PLCG2;PRF1;PTK2B;TNFSF10;VAV1;VAV3;ZAP70	Abomasum	G15m_G0d_up
bom04612	Antigen processing and presentation	Organismal Systems	Immune system	23	1.02664e-10	4.92322	B2M;CD4;CD74;CD8A;CD8B;CIITA;LOC102268170;LOC102269342;LOC102270654;LOC102271117;LOC102271676;LOC102272326;LOC102275624;LOC102278231;LOC102279719;LOC102280334;LOC102281193;LOC102282998;LOC102283463;LOC102285144;LOC102286220;TAP1;TAP2	Abomasum	G15m_G0d_up
bom05330	Allograft rejection	Human Diseases	Immune disease	17	9.9062e-10	6.02073	FASLG;LOC102268170;LOC102269342;LOC102270654;LOC102271117;LOC102271676;LOC102272326;LOC102275624;LOC102278231;LOC102281193;LOC102282998;LOC102283173;LOC102283463;LOC102285144;LOC102285463;LOC102286220;PRF1	Abomasum	G15m_G0d_up
bom05332	Graft-versus-host disease	Human Diseases	Immune disease	18	3.04294e-09	5.31241	FASLG;LOC102268170;LOC102269342;LOC102270654;LOC102271117;LOC102271676;LOC102272326;LOC102275624;LOC102278231;LOC102279719;LOC102280334;LOC102281193;LOC102282998;LOC102283463;LOC102285144;LOC102285463;LOC102286220;PRF1	Abomasum	G15m_G0d_up
bom05320	Autoimmune thyroid disease	Human Diseases	Immune disease	17	1.30283e-08	5.17407	FASLG;LOC102268170;LOC102269342;LOC102270654;LOC102271117;LOC102271676;LOC102272326;LOC102275624;LOC102278231;LOC102281193;LOC102282998;LOC102283173;LOC102283463;LOC102285144;LOC102285463;LOC102286220;PRF1	Abomasum	G15m_G0d_up
bom04060	Cytokine-cytokine receptor interaction	Environmental Information Processing	Signaling molecules and interaction	40	1.41656e-08	2.63228	BMPR1B;CCL16;CCL20;CCL22;CCL28;CCL5;CCR10;CCR7;CD27;CD4;CSF1R;CSF3R;CX3CR1;CXCL17;CXCR3;CXCR6;EBI3;EDA;EPOR;FASLG;IL12RB1;IL15;IL16;IL17RB;IL21R;IL22RA1;IL2RA;IL2RG;IL32;IL7;IL7R;LOC102264498;LOC102284639;LOC102284826;LOC102285534;LOC102288203;TNFRSF17;TNFSF10;TNFSF9;XCR1	Abomasum	G15m_G0d_up
bom05169	Epstein-Barr virus infection	Human Diseases	Infectious disease: viral	33	2.42362e-08	2.90861	B2M;BCL2L11;BLNK;BTK;CD247;CD3E;CD3G;CR2;IKBKE;IRF7;ITGAL;JAK3;LOC102268170;LOC102269342;LOC102270654;LOC102271117;LOC102271676;LOC102272326;LOC102275624;LOC102278231;LOC102281193;LOC102282998;LOC102283173;LOC102283231;LOC102283463;LOC102285144;LOC102286220;MAPK12;OAS2;PIK3CD;PLCG2;TAP1;TAP2	Abomasum	G15m_G0d_up
bom04940	Type I diabetes mellitus	Human Diseases	Endocrine and metabolic disease	16	3.29971e-08	5.19436	FASLG;LOC102268170;LOC102269342;LOC102270654;LOC102271117;LOC102271676;LOC102272326;LOC102275624;LOC102278231;LOC102281193;LOC102282998;LOC102283463;LOC102285144;LOC102285463;LOC102286220;PRF1	Abomasum	G15m_G0d_up
bom04061	Viral protein interaction with cytokine and cytokine receptor	Environmental Information Processing	Signaling molecules and interaction	19	3.93612e-08	4.35409	CCL16;CCL20;CCL22;CCL28;CCL5;CCR10;CCR7;CSF1R;CX3CR1;CXCR3;IL22RA1;IL2RA;IL2RG;LOC102264498;LOC102284639;LOC102285534;LOC102288203;TNFSF10;XCR1	Abomasum	G15m_G0d_up
bom04659	Th17 cell differentiation	Organismal Systems	Immune system	23	4.50494e-08	3.67224	CD247;CD3E;CD3G;CD4;IL12RB1;IL21R;IL2RA;IL2RG;IRF4;JAK3;LAT;LOC102269342;LOC102271117;LOC102271676;LOC102282998;LOC102283463;LOC102284639;LOC102285144;LOC102285579;MAPK12;PRKCQ;TBX21;ZAP70	Abomasum	G15m_G0d_up
bom04658	Th1 and Th2 cell differentiation	Organismal Systems	Immune system	21	5.05159e-08	3.93323	CD247;CD3E;CD3G;CD4;IL12RB1;IL2RA;IL2RG;JAK3;LAT;LOC102269342;LOC102271117;LOC102271676;LOC102282998;LOC102283463;LOC102284639;LOC102285144;MAF;MAPK12;PRKCQ;TBX21;ZAP70	Abomasum	G15m_G0d_up
bom04145	Phagosome	Cellular Processes	Transport and catabolism	27	6.04827e-08	3.20688	ATP6V1G3;CORO1A;DYNC1I1;ITGB2;LOC102266138;LOC102268170;LOC102269342;LOC102270654;LOC102271117;LOC102271676;LOC102272326;LOC102273069;LOC102273538;LOC102275624;LOC102278231;LOC102281193;LOC102282998;LOC102283173;LOC102283463;LOC102285144;LOC102286220;LOC102288244;NCF1;PLA2R1;RILP;TAP1;TAP2	Abomasum	G15m_G0d_up
bom04062	Chemokine signaling pathway	Organismal Systems	Immune system	28	1.91827e-07	2.96417	CCL16;CCL20;CCL22;CCL28;CCL5;CCR10;CCR7;CX3CR1;CXCR3;CXCR6;DOCK2;ITK;JAK3;LOC102264498;LOC102285534;LOC102288203;NCF1;PIK3CD;PIK3CG;PIK3R5;PIK3R6;PLCB2;PLCG2;PTK2B;VAV1;VAV3;WAS;XCR1	Abomasum	G15m_G0d_up
bom05416	Viral myocarditis	Human Diseases	Cardiovascular disease	17	3.69144e-07	4.19165	ITGAL;ITGB2;LOC102268170;LOC102269342;LOC102270654;LOC102271117;LOC102271676;LOC102272326;LOC102275624;LOC102278231;LOC102281193;LOC102282998;LOC102283173;LOC102283463;LOC102285144;LOC102286220;PRF1	Abomasum	G15m_G0d_up
bom04672	Intestinal immune network for IgA production	Organismal Systems	Immune system	14	1.1423e-06	4.6221	CCL28;CCR10;ICOS;IL15;ITGA4;LOC102269342;LOC102271117;LOC102271676;LOC102282998;LOC102283173;LOC102283463;LOC102285144;PIGR;TNFRSF17	Abomasum	G15m_G0d_up
bom00590	Arachidonic acid metabolism	Metabolism	Lipid metabolism	16	6.19213e-06	3.62397	ALOX5;EPHX2;GGT1;LOC102267155;LOC102272527;LOC102272594;LOC102272882;LOC102279309;LOC102280157;LOC102281471;LOC102282243;LOC102284205;PLA2G1B;PLA2G4F;PLA2G5;TBXAS1	Abomasum	G15m_G0d_up
bom04660	T cell receptor signaling pathway	Organismal Systems	Immune system	18	1.23512e-05	3.15873	CD247;CD3E;CD3G;CD4;CD8A;CD8B;ICOS;ITK;LAT;LCP2;MAPK12;PIK3CD;PRKCQ;PTPRC;RASGRP1;VAV1;VAV3;ZAP70	Abomasum	G15m_G0d_up
bom04926	Relaxin signaling pathway	Organismal Systems	Endocrine system	11	0.000413362	3.36879	ACTA2;COL1A1;COL1A2;COL3A1;COL4A1;COL4A2;CREB3L3;FOS;GNG10;LOC102286123;SHC4	Abomasum	G15m_G0d_down
bom04974	Protein digestion and absorption	Organismal Systems	Digestive system	11	0.000569078	3.24494	COL11A1;COL1A1;COL1A2;COL3A1;COL4A1;COL4A2;COL5A1;KCNE3;LOC102276388;LOC102284061;LOC106701596	Abomasum	G15m_G0d_down
bom00480	Glutathione metabolism	Metabolism	Metabolism of other amino acids	7	0.000754902	4.60385	CHAC1;GPX7;GPX8;LOC102274807;LOC102276661;ODC1;SRM	Abomasum	G15m_G0d_down
bom05146	Amoebiasis	Human Diseases	Infectious disease: parasitic	9	0.00103798	3.50557	COL1A1;COL1A2;COL3A1;COL4A1;COL4A2;IL1R2;LOC102286123;PRDX1;TGFB3	Abomasum	G15m_G0d_down
bom04933	AGE-RAGE signaling pathway in diabetic complications	Human Diseases	Endocrine and metabolic disease	9	0.00127362	3.40635	COL1A1;COL1A2;COL3A1;COL4A1;COL4A2;PLCD3;SERPINE1;TGFB3;THBD	Abomasum	G15m_G0d_down
bom04978	Mineral absorption	Organismal Systems	Digestive system	7	0.00171715	4.01193	ATP2B4;CLCN2;LOC102278728;LOC102279580;STEAP1;STEAP2;TF	Abomasum	G15m_G0d_down
bom04960	Aldosterone-regulated sodium reabsorption	Organismal Systems	Excretory system	5	0.00209062	5.42152	IGF1;SCNN1A;SCNN1B;SCNN1G;SFN	Abomasum	G15m_G0d_down
bom04918	Thyroid hormone synthesis	Organismal Systems	Endocrine system	7	0.00256044	3.74446	CREB3L3;GPX7;GPX8;HSPA5;LOC102286123;TPO;TTR	Abomasum	G15m_G0d_down
bom03008	Ribosome biogenesis in eukaryotes	Genetic Information Processing	Translation	7	0.00395691	3.4671	FBL;GNL3;NHP2;NOL6;NOP58;POP1;RPP38	Abomasum	G15m_G0d_down
bom04510	Focal adhesion	Cellular Processes	Cellular community - eukaryotes	12	0.00477728	2.37158	COL1A1;COL1A2;COL4A1;COL4A2;FLNC;IGF1;ITGA2;ITGA5;PAK6;RAC3;SHC4;TNC	Abomasum	G15m_G0d_down
bom04927	Cortisol synthesis and secretion	Organismal Systems	Endocrine system	6	0.00585628	3.64721	CACNA1G;CACNA1S;CREB3L3;LOC102282116;LOC102286123;NR4A1	Abomasum	G15m_G0d_down
bom00524	Neomycin, kanamycin and gentamicin biosynthesis	Metabolism	Biosynthesis of other secondary metabolites	2	0.00588513	16.0477	HK2;HKDC1	Abomasum	G15m_G0d_down
bom04512	ECM-receptor interaction	Environmental Information Processing	Signaling molecules and interaction	7	0.00663635	3.15545	COL1A1;COL1A2;COL4A1;COL4A2;ITGA2;ITGA5;TNC	Abomasum	G15m_G0d_down
bom04540	Gap junction	Cellular Processes	Cellular community - eukaryotes	7	0.00663635	3.15545	LOC102270684;LOC102270959;LOC102273697;LOC102281195;LOC102286123;TUBB4B;TUBB6	Abomasum	G15m_G0d_down
bom04610	Complement and coagulation cascades	Organismal Systems	Immune system	7	0.00663635	3.15545	F7;KNG1;PLAT;PLAU;PLAUR;SERPINE1;THBD	Abomasum	G15m_G0d_down
bom00520	Amino sugar and nucleotide sugar metabolism	Metabolism	Carbohydrate metabolism	5	0.00922437	3.85762	GFPT2;GMPPA;HK2;HKDC1;UGDH	Abomasum	G15m_G0d_down
bom00532	Glycosaminoglycan biosynthesis - chondroitin sulfate / dermatan sulfate	Metabolism	Glycan biosynthesis and metabolism	3	0.00945209	6.68654	B4GALT7;CHPF;CHPF2	Abomasum	G15m_G0d_down
bom00240	Pyrimidine metabolism	Metabolism	Nucleotide metabolism	5	0.0107852	3.71475	CTPS1;LOC102267804;LOC102270686;NT5C2;UCK2	Abomasum	G15m_G0d_down
bom05418	Fluid shear stress and atherosclerosis	Human Diseases	Cardiovascular disease	9	0.012098	2.42331	DUSP1;FOS;IL1R2;LOC102274807;LOC102276661;PLAT;RAC3;THBD;TRPV4	Abomasum	G15m_G0d_down
bom04925	Aldosterone synthesis and secretion	Organismal Systems	Endocrine system	7	0.0122687	2.80835	ATP2B4;CACNA1G;CACNA1S;CREB3L3;LOC102282116;LOC102286123;NR4A1	Abomasum	G15m_G0d_down
bom04640	Hematopoietic cell lineage	Organismal Systems	Immune system	37	1.50944e-20	6.20926	CD19;CD1E;CD2;CD22;CD37;CD3E;CD3G;CD4;CD5;CD59;CD7;CD8A;CD8B;CR2;CSF3R;FCER2;FLT3;IL2RA;IL7;IL7R;ITGA4;ITGA6;KIT;KITLG;LOC102268126;LOC102269342;LOC102271117;LOC102271676;LOC102282150;LOC102282998;LOC102283173;LOC102283463;LOC102284391;LOC102284739;LOC102285144;LOC102288394;MS4A1	Abomasum	GAdult_G0d_up
bom05340	Primary immunodeficiency	Human Diseases	Immune disease	21	5.51919e-17	9.62005	BTK;CD19;CD3E;CD4;CD40LG;CD79A;CD8A;CD8B;CIITA;ICOS;IL2RG;IL7R;JAK3;LCK;LOC102268126;LOC102280800;LOC102283173;PTPRC;TAP1;TAP2;ZAP70	Abomasum	GAdult_G0d_up
bom05330	Allograft rejection	Human Diseases	Immune disease	23	1.05408e-14	7.08802	CD40LG;CD80;FASLG;IFNG;LOC102268126;LOC102268170;LOC102269342;LOC102271117;LOC102271676;LOC102272326;LOC102275624;LOC102281193;LOC102282150;LOC102282998;LOC102283173;LOC102283463;LOC102284391;LOC102285144;LOC102285196;LOC102285463;LOC102286220;LOC102286791;PRF1	Abomasum	GAdult_G0d_up
bom04612	Antigen processing and presentation	Organismal Systems	Immune system	27	9.40142e-13	5.02901	B2M;CD4;CD74;CD8A;CD8B;CIITA;IFNG;LOC102268170;LOC102269342;LOC102271117;LOC102271676;LOC102272326;LOC102275624;LOC102280334;LOC102281193;LOC102282150;LOC102282998;LOC102283463;LOC102284391;LOC102284891;LOC102285144;LOC102286220;LOC102286791;PSME1;PSME2;TAP1;TAP2	Abomasum	GAdult_G0d_up
bom05169	Epstein-Barr virus infection	Human Diseases	Infectious disease: viral	43	1.93734e-12	3.29789	B2M;BTK;CCNA2;CCNE2;CD19;CD247;CD3E;CD3G;CR2;DDX58;E2F2;FCER2;IKBKE;IRF7;IRF9;ISG15;ITGAL;JAK3;LOC102268126;LOC102268170;LOC102269342;LOC102271117;LOC102271676;LOC102272326;LOC102272934;LOC102275624;LOC102281193;LOC102282150;LOC102282998;LOC102283173;LOC102283231;LOC102283463;LOC102283513;LOC102284391;LOC102285144;LOC102286220;LOC102286791;OAS2;PIK3CD;STAT1;STAT2;TAP1;TAP2	Abomasum	GAdult_G0d_up
bom05320	Autoimmune thyroid disease	Human Diseases	Immune disease	22	4.59375e-12	5.82643	CD40LG;CD80;FASLG;LOC102268126;LOC102268170;LOC102269342;LOC102271117;LOC102271676;LOC102272326;LOC102275624;LOC102281193;LOC102282150;LOC102282998;LOC102283173;LOC102283463;LOC102284391;LOC102285144;LOC102285196;LOC102285463;LOC102286220;LOC102286791;PRF1	Abomasum	GAdult_G0d_up
bom05332	Graft-versus-host disease	Human Diseases	Immune disease	22	9.31877e-12	5.64987	CD80;FASLG;IFNG;LOC102268170;LOC102269342;LOC102271117;LOC102271676;LOC102272326;LOC102275624;LOC102280334;LOC102281193;LOC102282150;LOC102282998;LOC102283463;LOC102284391;LOC102284891;LOC102285144;LOC102285196;LOC102285463;LOC102286220;LOC102286791;PRF1	Abomasum	GAdult_G0d_up
bom04659	Th17 cell differentiation	Organismal Systems	Immune system	29	5.81578e-11	4.02901	CD247;CD3E;CD3G;CD4;FOXP3;IFNG;IL12RB1;IL21R;IL2RA;IL2RG;IRF4;JAK3;LAT;LCK;LOC102269342;LOC102271117;LOC102271676;LOC102282150;LOC102282998;LOC102283463;LOC102284391;LOC102284639;LOC102285144;LOC102285579;PRKCQ;RUNX1;STAT1;TBX21;ZAP70	Abomasum	GAdult_G0d_up
bom04672	Intestinal immune network for IgA production	Organismal Systems	Immune system	20	5.86788e-11	5.74563	CCR10;CD40LG;CD80;CXCL12;ICOS;IL15;ITGA4;LOC102268126;LOC102269342;LOC102271117;LOC102271676;LOC102282150;LOC102282998;LOC102283173;LOC102283463;LOC102284391;LOC102285144;PIGR;TNFRSF17;TNFSF13B	Abomasum	GAdult_G0d_up
bom04940	Type I diabetes mellitus	Human Diseases	Endocrine and metabolic disease	20	8.32598e-11	5.64987	CD80;FASLG;IFNG;LOC102268170;LOC102269342;LOC102271117;LOC102271676;LOC102272326;LOC102275624;LOC102281193;LOC102282150;LOC102282998;LOC102283463;LOC102284391;LOC102285144;LOC102285196;LOC102285463;LOC102286220;LOC102286791;PRF1	Abomasum	GAdult_G0d_up
bom04658	Th1 and Th2 cell differentiation	Organismal Systems	Immune system	26	1.76541e-10	4.2374	CD247;CD3E;CD3G;CD4;IFNG;IL12RB1;IL2RA;IL2RG;JAK3;LAT;LCK;LOC102269342;LOC102271117;LOC102271676;LOC102272934;LOC102282150;LOC102282998;LOC102283463;LOC102284391;LOC102284639;LOC102285144;PRKCQ;STAT1;STAT4;TBX21;ZAP70	Abomasum	GAdult_G0d_up
bom04650	Natural killer cell mediated cytotoxicity	Organismal Systems	Immune system	30	2.3853e-10	3.71159	CD244;CD247;CD48;FASLG;IFNG;ITGAL;ITGB2;LAT;LCK;LCP2;LOC102268126;LOC102268170;LOC102272326;LOC102273538;LOC102275624;LOC102277959;LOC102280334;LOC102281193;LOC102283173;LOC102284891;LOC102285170;LOC102285196;LOC102285463;LOC102286220;LOC102286791;PIK3CD;PRF1;TNFSF10;VAV1;ZAP70	Abomasum	GAdult_G0d_up
bom04514	Cell adhesion molecules	Environmental Information Processing	Signaling molecules and interaction	32	6.99356e-10	3.38992	CD2;CD22;CD274;CD4;CD40LG;CD6;CD80;CD8A;CD8B;ICOS;ITGA4;ITGA6;ITGAL;ITGB2;LOC102268170;LOC102269342;LOC102271117;LOC102271676;LOC102272326;LOC102275624;LOC102281193;LOC102282150;LOC102282998;LOC102283463;LOC102284391;LOC102285144;LOC102286220;LOC102286791;PDCD1LG2;PTPRC;SELL;SPN	Abomasum	GAdult_G0d_up
bom04060	Cytokine-cytokine receptor interaction	Environmental Information Processing	Signaling molecules and interaction	45	3.06249e-09	2.5768	BMPR1B;CCL16;CCL20;CCL22;CCL5;CCR10;CCR7;CD27;CD4;CD40LG;CSF2RB;CSF3R;CX3CR1;CXCL11;CXCL12;CXCL14;CXCL17;CXCR3;CXCR6;EBI3;FASLG;IFNG;IL12RB1;IL15;IL16;IL17RB;IL18RAP;IL21R;IL22RA1;IL2RA;IL2RG;IL32;IL34;IL7;IL7R;LOC102264498;LOC102284639;LOC102284739;LOC102284826;LOC102285534;TNFRSF17;TNFSF10;TNFSF13B;TNFSF14;TNFSF9	Abomasum	GAdult_G0d_up
bom05416	Viral myocarditis	Human Diseases	Cardiovascular disease	21	3.08681e-09	4.50559	CD40LG;CD80;ITGAL;ITGB2;LOC102268126;LOC102268170;LOC102269342;LOC102271117;LOC102271676;LOC102272326;LOC102275624;LOC102281193;LOC102282150;LOC102282998;LOC102283173;LOC102283463;LOC102284391;LOC102285144;LOC102286220;LOC102286791;PRF1	Abomasum	GAdult_G0d_up
bom04061	Viral protein interaction with cytokine and cytokine receptor	Environmental Information Processing	Signaling molecules and interaction	21	1.29008e-08	4.18755	CCL16;CCL20;CCL22;CCL5;CCR10;CCR7;CX3CR1;CXCL11;CXCL12;CXCL14;CXCR3;IL18RAP;IL22RA1;IL2RA;IL2RG;IL34;LOC102264498;LOC102284639;LOC102285534;TNFSF10;TNFSF14	Abomasum	GAdult_G0d_up
bom05310	Asthma	Human Diseases	Immune disease	13	2.48994e-07	5.50862	CD40LG;FCER1A;LOC102268126;LOC102269342;LOC102271117;LOC102271676;LOC102282150;LOC102282998;LOC102283173;LOC102283463;LOC102284391;LOC102285144;MS4A2	Abomasum	GAdult_G0d_up
bom04145	Phagosome	Cellular Processes	Transport and catabolism	28	2.88128e-07	2.89384	C3;CORO1A;DYNC1I1;ITGB2;LOC102268126;LOC102268170;LOC102269342;LOC102271117;LOC102271676;LOC102272326;LOC102273069;LOC102273538;LOC102275624;LOC102281193;LOC102282150;LOC102282998;LOC102283173;LOC102283463;LOC102284391;LOC102285144;LOC102286220;LOC102286791;LOC102288244;NCF1;RILP;TAP1;TAP2;TUBB4A	Abomasum	GAdult_G0d_up
bom05140	Leishmaniasis	Human Diseases	Infectious disease: parasitic	18	3.50794e-07	3.96225	C3;IFNG;ITGA4;ITGB2;LOC102268126;LOC102269342;LOC102271117;LOC102271676;LOC102273538;LOC102282150;LOC102282998;LOC102283173;LOC102283463;LOC102284391;LOC102285144;LOC102288244;NCF1;STAT1	Abomasum	GAdult_G0d_up
bom05166	Human T-cell leukemia virus 1 infection	Human Diseases	Infectious disease: viral	35	5.20241e-07	2.47182	B2M;BUB1B;CCNA2;CCNE2;CD3E;CD3G;CD4;CDKN2C;E2F2;ESPL1;IL15;IL2RA;IL2RG;ITGAL;ITGB2;JAK3;LCK;LOC102268170;LOC102269342;LOC102271117;LOC102271676;LOC102272326;LOC102275624;LOC102281193;LOC102282150;LOC102282998;LOC102283463;LOC102284391;LOC102284639;LOC102285144;LOC102286220;LOC102286791;MMP7;PIK3CD;PTTG1	Abomasum	GAdult_G0d_up
bom04512	ECM-receptor interaction	Environmental Information Processing	Signaling molecules and interaction	18	5.07355e-12	8.04025	COL1A1;COL1A2;COL4A1;COL4A2;COL4A5;COL6A1;COL6A2;ITGA10;ITGA11;ITGA2;ITGA5;ITGB6;LAMA2;LAMB1;LAMC1;LAMC3;LOC102268113;SPP1	Abomasum	GAdult_G0d_down
bom05146	Amoebiasis	Human Diseases	Infectious disease: parasitic	15	3.64994e-08	5.7895	ADCY1;COL1A1;COL1A2;COL3A1;COL4A1;COL4A2;COL4A5;GNA14;IL1R2;LAMA2;LAMB1;LAMC1;LAMC3;LOC102286123;TGFB3	Abomasum	GAdult_G0d_down
bom04974	Protein digestion and absorption	Organismal Systems	Digestive system	17	4.54873e-08	4.96932	COL11A1;COL12A1;COL1A1;COL1A2;COL3A1;COL4A1;COL4A2;COL4A5;COL5A1;COL5A2;COL6A1;COL6A2;CPB1;LOC102268113;LOC102276388;LOC106701596;PRSS2	Abomasum	GAdult_G0d_down
bom04510	Focal adhesion	Cellular Processes	Cellular community - eukaryotes	20	1.64561e-07	3.9167	COL1A1;COL1A2;COL4A1;COL4A2;COL4A5;COL6A1;COL6A2;IGF1;ITGA10;ITGA11;ITGA2;ITGA5;ITGB6;LAMA2;LAMB1;LAMC1;LAMC3;LOC102268113;PAK6;SPP1	Abomasum	GAdult_G0d_down
bom05204	Chemical carcinogenesis - DNA adducts	Human Diseases	Cancer: overview	11	2.30569e-07	7.28833	LOC102264665;LOC102273409;LOC102274807;LOC102276661;LOC102276699;LOC102279786;LOC102280721;LOC102280731;LOC102282831;LOC102287938;PTGS2	Abomasum	GAdult_G0d_down
bom05414	Dilated cardiomyopathy	Human Diseases	Cardiovascular disease	13	8.16732e-07	5.32793	ADCY1;ADCY2;AGT;CACNA1S;IGF1;ITGA10;ITGA11;ITGA2;ITGA5;ITGB6;LAMA2;LOC102286123;TGFB3	Abomasum	GAdult_G0d_down
bom05410	Hypertrophic cardiomyopathy	Human Diseases	Cardiovascular disease	11	1.60605e-05	4.80549	AGT;CACNA1S;IGF1;ITGA10;ITGA11;ITGA2;ITGA5;ITGB6;LAMA2;LOC102273543;TGFB3	Abomasum	GAdult_G0d_down
bom05165	Human papillomavirus infection	Human Diseases	Infectious disease: viral	22	4.12357e-05	2.57994	COL1A1;COL1A2;COL4A1;COL4A2;COL4A5;COL6A1;COL6A2;CREB3L3;ITGA10;ITGA11;ITGA2;ITGA5;ITGB6;LAMA2;LAMB1;LAMC1;LAMC3;LOC102268113;LOC102286123;PTGS2;SPP1;WNT2B	Abomasum	GAdult_G0d_down
bom04151	PI3K-Akt signaling pathway	Environmental Information Processing	Signal transduction	22	0.000156196	2.35741	CHRM1;COL1A1;COL1A2;COL4A1;COL4A2;COL4A5;COL6A1;COL6A2;CREB3L3;IGF1;IGF2;ITGA10;ITGA11;ITGA2;ITGA5;ITGB6;LAMA2;LAMB1;LAMC1;LAMC3;LOC102268113;SPP1	Abomasum	GAdult_G0d_down
bom05222	Small cell lung cancer	Human Diseases	Cancer: specific types	10	0.00016745	4.05659	COL4A1;COL4A2;COL4A5;GADD45B;ITGA2;LAMA2;LAMB1;LAMC1;LAMC3;PTGS2	Abomasum	GAdult_G0d_down
bom00830	Retinol metabolism	Metabolism	Metabolism of cofactors and vitamins	8	0.00031515	4.60922	DGAT1;LOC102264665;LOC102265968;LOC102272258;LOC102276699;LOC102279786;LOC102280731;LOC102282831	Abomasum	GAdult_G0d_down
bom04933	AGE-RAGE signaling pathway in diabetic complications	Human Diseases	Endocrine and metabolic disease	10	0.000319738	3.75043	AGT;COL1A1;COL1A2;COL3A1;COL4A1;COL4A2;COL4A5;MMP2;PLCD3;TGFB3	Abomasum	GAdult_G0d_down
bom04926	Relaxin signaling pathway	Organismal Systems	Endocrine system	11	0.000446677	3.33817	ADCY1;ADCY2;COL1A1;COL1A2;COL3A1;COL4A1;COL4A2;COL4A5;CREB3L3;LOC102286123;MMP2	Abomasum	GAdult_G0d_down
bom00040	Pentose and glucuronate interconversions	Metabolism	Carbohydrate metabolism	5	0.000494237	7.36195	AKR1B1;LOC102264665;LOC102276699;LOC102282831;UGDH	Abomasum	GAdult_G0d_down
bom05412	Arrhythmogenic right ventricular cardiomyopathy	Human Diseases	Cardiovascular disease	8	0.000510131	4.29779	CACNA1S;CDH2;ITGA10;ITGA11;ITGA2;ITGA5;ITGB6;LAMA2	Abomasum	GAdult_G0d_down
bom00980	Metabolism of xenobiotics by cytochrome P450	Metabolism	Xenobiotics biodegradation and metabolism	7	0.000879312	4.48842	LOC102264665;LOC102274807;LOC102276661;LOC102276699;LOC102280721;LOC102282831;LOC102287938	Abomasum	GAdult_G0d_down
bom04911	Insulin secretion	Organismal Systems	Endocrine system	8	0.00149635	3.65559	ADCY1;ADCY2;ADCYAP1;CACNA1S;CREB3L3;GCG;LOC102286123;SNAP25	Abomasum	GAdult_G0d_down
bom00051	Fructose and mannose metabolism	Metabolism	Carbohydrate metabolism	5	0.00168783	5.67922	AKR1B1;ALDOB;ALDOC;HK2;PFKL	Abomasum	GAdult_G0d_down
bom04918	Thyroid hormone synthesis	Organismal Systems	Endocrine system	7	0.00269504	3.71042	ADCY1;ADCY2;CREB3L3;GPX7;GPX8;LOC102286123;TTR	Abomasum	GAdult_G0d_down
bom00982	Drug metabolism - cytochrome P450	Metabolism	Xenobiotics biodegradation and metabolism	6	0.00321706	4.11254	LOC102264665;LOC102274807;LOC102276661;LOC102276699;LOC102282831;LOC102287938	Abomasum	GAdult_G0d_down
bom04612	Antigen processing and presentation	Organismal Systems	Immune system	9	6.70152e-09	14.9136	CIITA;HSPA6;HSPA8;LOC102268170;LOC102270654;LOC102275624;LOC102278697;LOC102278977;LOC102286220	Abomasum	G60d_G20d_up
bom00140	Steroid hormone biosynthesis	Metabolism	Lipid metabolism	5	0.000100311	10.6192	HSD17B2;LOC102267155;LOC102270864;LOC102272882;LOC102284686	Abomasum	G60d_G20d_up
bom03030	DNA replication	Genetic Information Processing	Replication and repair	4	0.000108655	15.873	DNA2;MCM2;MCM5;POLE	Abomasum	G60d_G20d_up
bom05416	Viral myocarditis	Human Diseases	Cardiovascular disease	5	0.000166769	9.54387	CCND1;LOC102268170;LOC102270654;LOC102275624;LOC102286220	Abomasum	G60d_G20d_up
bom04144	Endocytosis	Cellular Processes	Transport and catabolism	8	0.0002606	4.71228	HSPA6;HSPA8;LOC102268170;LOC102270654;LOC102275624;LOC102278697;LOC102278977;LOC102286220	Abomasum	G60d_G20d_up
bom04650	Natural killer cell mediated cytotoxicity	Organismal Systems	Immune system	6	0.000274518	6.60408	LOC102268170;LOC102270654;LOC102275624;LOC102277959;LOC102286220;LOC102286507	Abomasum	G60d_G20d_up
bom05167	Kaposi sarcoma-associated herpesvirus infection	Human Diseases	Infectious disease: viral	7	0.000382801	5.14903	CCND1;LOC102268170;LOC102270654;LOC102275624;LOC102277959;LOC102286220;LOC102286507	Abomasum	G60d_G20d_up
bom04915	Estrogen signaling pathway	Organismal Systems	Endocrine system	6	0.000386754	6.19698	HSPA6;HSPA8;KRT12;KRT20;LOC102278697;LOC102278977	Abomasum	G60d_G20d_up
bom05162	Measles	Human Diseases	Infectious disease: viral	6	0.000401161	6.15482	CCND1;HSPA6;HSPA8;LOC102273069;LOC102278697;LOC102278977	Abomasum	G60d_G20d_up
bom05330	Allograft rejection	Human Diseases	Immune disease	4	0.000461673	10.9668	LOC102268170;LOC102270654;LOC102275624;LOC102286220	Abomasum	G60d_G20d_up
bom05134	Legionellosis	Human Diseases	Infectious disease: bacterial	4	0.000494745	10.7709	HSPA6;HSPA8;LOC102278697;LOC102278977	Abomasum	G60d_G20d_up
bom04213	Longevity regulating pathway - multiple species	Organismal Systems	Aging	4	0.000644045	10.0529	HSPA6;HSPA8;LOC102278697;LOC102278977	Abomasum	G60d_G20d_up
bom04940	Type I diabetes mellitus	Human Diseases	Endocrine and metabolic disease	4	0.000644045	10.0529	LOC102268170;LOC102270654;LOC102275624;LOC102286220	Abomasum	G60d_G20d_up
bom04218	Cellular senescence	Cellular Processes	Cell growth and death	6	0.000764157	5.45035	CCND1;FOXM1;LOC102268170;LOC102270654;LOC102275624;LOC102286220	Abomasum	G60d_G20d_up
bom05320	Autoimmune thyroid disease	Human Diseases	Immune disease	4	0.000822823	9.42457	LOC102268170;LOC102270654;LOC102275624;LOC102286220	Abomasum	G60d_G20d_up
bom05332	Graft-versus-host disease	Human Diseases	Immune disease	4	0.00092421	9.13898	LOC102268170;LOC102270654;LOC102275624;LOC102286220	Abomasum	G60d_G20d_up
bom04141	Protein processing in endoplasmic reticulum	Genetic Information Processing	Folding, sorting and degradation	6	0.00097716	5.19976	DNAJB1;HSPA6;HSPA8;HSPH1;LOC102278697;LOC102278977	Abomasum	G60d_G20d_up
bom05145	Toxoplasmosis	Human Diseases	Infectious disease: parasitic	5	0.00102375	6.44415	CIITA;HSPA6;HSPA8;LOC102278697;LOC102278977	Abomasum	G60d_G20d_up
bom04110	Cell cycle	Cellular Processes	Cell growth and death	5	0.00147718	5.93674	CCND1;MCM2;MCM5;ORC1;PKMYT1	Abomasum	G60d_G20d_up
bom04662	B cell receptor signaling pathway	Organismal Systems	Immune system	4	0.00149119	8.0423	CD79A;CD79B;INPP5D;LOC102273069	Abomasum	G60d_G20d_up
bom00982	Drug metabolism - cytochrome P450	Metabolism	Xenobiotics biodegradation and metabolism	4	3.65496e-05	20.799	FMO1;LOC102282831;LOC102287938;MAOB	Abomasum	G60d_G20d_down
bom04960	Aldosterone-regulated sodium reabsorption	Organismal Systems	Excretory system	3	0.000236115	24.4529	IGF1;SCNN1B;SCNN1G	Abomasum	G60d_G20d_down
bom04022	cGMP-PKG signaling pathway	Environmental Information Processing	Signal transduction	4	0.00233643	7.01363	ADRA2C;ATP2B2;KNG1;PLN	Abomasum	G60d_G20d_down
bom04919	Thyroid hormone signaling pathway	Organismal Systems	Endocrine system	3	0.00742756	7.41605	DIO1;PFKM;PLN	Abomasum	G60d_G20d_down
bom00330	Arginine and proline metabolism	Metabolism	Amino acid metabolism	2	0.012705	11.5995	L3HYPDH;MAOB	Abomasum	G60d_G20d_down
bom05204	Chemical carcinogenesis - DNA adducts	Human Diseases	Cancer: overview	2	0.0166845	10.0529	LOC102282831;LOC102287938	Abomasum	G60d_G20d_down
bom02010	ABC transporters	Environmental Information Processing	Membrane transport	2	0.017215	9.88807	ABCG1;LOC102285550	Abomasum	G60d_G20d_down
bom00980	Metabolism of xenobiotics by cytochrome P450	Metabolism	Xenobiotics biodegradation and metabolism	2	0.0177526	9.72859	LOC102282831;LOC102287938	Abomasum	G60d_G20d_down
bom00983	Drug metabolism - other enzymes	Metabolism	Xenobiotics biodegradation and metabolism	2	0.0229052	8.49539	LOC102282831;LOC102287938	Abomasum	G60d_G20d_down
bom04742	Taste transduction	Organismal Systems	Sensory system	2	0.0299338	7.35576	SCNN1B;SCNN1G	Abomasum	G60d_G20d_down
bom05414	Dilated cardiomyopathy	Human Diseases	Cardiovascular disease	2	0.0407093	6.21827	IGF1;PLN	Abomasum	G60d_G20d_down
bom04972	Pancreatic secretion	Organismal Systems	Digestive system	2	0.0461709	5.79973	ATP2B2;CLCA1	Abomasum	G60d_G20d_down
bom04066	HIF-1 signaling pathway	Environmental Information Processing	Signal transduction	2	0.0510563	5.48339	IGF1;PFKM	Abomasum	G60d_G20d_down
bom04750	Inflammatory mediator regulation of TRP channels	Organismal Systems	Sensory system	2	0.052725	5.38547	IGF1;KNG1	Abomasum	G60d_G20d_down
bom00670	One carbon pool by folate	Metabolism	Metabolism of cofactors and vitamins	1	0.0580865	16.7548	ALDH1L2	Abomasum	G60d_G20d_down
bom04071	Sphingolipid signaling pathway	Environmental Information Processing	Signal transduction	2	0.062245	4.90384	KNG1;S1PR3	Abomasum	G60d_G20d_down
bom04152	AMPK signaling pathway	Environmental Information Processing	Signal transduction	2	0.0631381	4.86429	IGF1;PFKM	Abomasum	G60d_G20d_down
bom00340	Histidine metabolism	Metabolism	Amino acid metabolism	1	0.070545	13.7085	MAOB	Abomasum	G60d_G20d_down
bom00360	Phenylalanine metabolism	Metabolism	Amino acid metabolism	1	0.070545	13.7085	MAOB	Abomasum	G60d_G20d_down
bom04974	Protein digestion and absorption	Organismal Systems	Digestive system	2	0.0741909	4.43509	COL12A1;COL4A1	Abomasum	G60d_G20d_down
bom00982	Drug metabolism - cytochrome P450	Metabolism	Xenobiotics biodegradation and metabolism	4	0.000319521	12.0634	FMO1;LOC102281471;LOC102282379;LOC102287938	Abomasum	G15m_G60d_up
bom00620	Pyruvate metabolism	Metabolism	Carbohydrate metabolism	3	0.00210716	11.6613	ACACB;LDHB;ME3	Abomasum	G15m_G60d_up
bom05204	Chemical carcinogenesis - DNA adducts	Human Diseases	Cancer: overview	3	0.00478541	8.746	LOC102281471;LOC102282379;LOC102287938	Abomasum	G15m_G60d_up
bom00980	Metabolism of xenobiotics by cytochrome P450	Metabolism	Xenobiotics biodegradation and metabolism	3	0.00524674	8.46387	LOC102281471;LOC102282379;LOC102287938	Abomasum	G15m_G60d_up
bom00140	Steroid hormone biosynthesis	Metabolism	Lipid metabolism	3	0.00764927	7.39099	LOC102281471;LOC102282243;LOC102282379	Abomasum	G15m_G60d_up
bom00983	Drug metabolism - other enzymes	Metabolism	Xenobiotics biodegradation and metabolism	3	0.00764927	7.39099	LOC102281471;LOC102282379;LOC102287938	Abomasum	G15m_G60d_up
bom00040	Pentose and glucuronate interconversions	Metabolism	Carbohydrate metabolism	2	0.0102631	12.957	AKR1B1;LOC102282379	Abomasum	G15m_G60d_up
bom00590	Arachidonic acid metabolism	Metabolism	Lipid metabolism	3	0.0129025	6.10186	LOC102281471;LOC102282243;PLA2G4F	Abomasum	G15m_G60d_up
bom00601	Glycosphingolipid biosynthesis - lacto and neolacto series	Metabolism	Glycan biosynthesis and metabolism	2	0.0134004	11.2852	A4GALT;ST3GAL4	Abomasum	G15m_G60d_up
bom00640	Propanoate metabolism	Metabolism	Carbohydrate metabolism	2	0.015106	10.6012	ACACB;LDHB	Abomasum	G15m_G60d_up
bom04976	Bile secretion	Organismal Systems	Digestive system	3	0.0168378	5.52379	LOC102282379;SLC4A5;SLC9A3	Abomasum	G15m_G60d_up
bom00051	Fructose and mannose metabolism	Metabolism	Carbohydrate metabolism	2	0.0169	9.99543	AKR1B1;FBP1	Abomasum	G15m_G60d_up
bom04970	Salivary secretion	Organismal Systems	Digestive system	3	0.017794	5.4099	LOC102273154;LOC102273435;LOC102273729	Abomasum	G15m_G60d_up
bom05340	Primary immunodeficiency	Human Diseases	Immune disease	2	0.0187802	9.45514	JAK3;LOC102280800	Abomasum	G15m_G60d_up
bom00564	Glycerophospholipid metabolism	Metabolism	Lipid metabolism	3	0.0219179	4.99771	CHAT;ETNPPL;PLA2G4F	Abomasum	G15m_G60d_up
bom00591	Linoleic acid metabolism	Metabolism	Lipid metabolism	2	0.0238441	8.32952	LOC102281471;PLA2G4F	Abomasum	G15m_G60d_up
bom04922	Glucagon signaling pathway	Organismal Systems	Endocrine system	3	0.02416	4.81431	ACACB;FBP1;LDHB	Abomasum	G15m_G60d_up
bom04152	AMPK signaling pathway	Environmental Information Processing	Signal transduction	3	0.0336375	4.23194	ACACB;FBP1;LEPR	Abomasum	G15m_G60d_up
bom00480	Glutathione metabolism	Metabolism	Metabolism of other amino acids	2	0.0473314	5.73508	GGT6;LOC102287938	Abomasum	G15m_G60d_up
bom05418	Fluid shear stress and atherosclerosis	Human Diseases	Cardiovascular disease	3	0.0531155	3.52188	BMPR1B;LOC102269419;LOC102287938	Abomasum	G15m_G60d_up
bom04512	ECM-receptor interaction	Environmental Information Processing	Signaling molecules and interaction	5	7.74045e-05	11.167	COL1A1;COL1A2;LOC102268494;NPNT;TNC	Abomasum	G15m_G60d_down
bom04110	Cell cycle	Cellular Processes	Cell growth and death	5	0.000411611	7.8257	CCNA2;E2F1;MCM2;MCM5;TTK	Abomasum	G15m_G60d_down
bom04974	Protein digestion and absorption	Organismal Systems	Digestive system	4	0.00469148	5.84626	COL14A1;COL1A1;COL1A2;COL3A1	Abomasum	G15m_G60d_down
bom04024	cAMP signaling pathway	Environmental Information Processing	Signal transduction	5	0.00665628	4.15843	ATP2A3;CHRM1;GRIA3;HTR1B;SST	Abomasum	G15m_G60d_down
bom05206	MicroRNAs in cancer	Human Diseases	Cancer: overview	4	0.00903073	4.84812	E2F1;IGF2BP1;PLAU;TNC	Abomasum	G15m_G60d_down
bom05146	Amoebiasis	Human Diseases	Infectious disease: parasitic	3	0.0148131	5.7895	COL1A1;COL1A2;COL3A1	Abomasum	G15m_G60d_down
bom05202	Transcriptional misregulation in cancer	Human Diseases	Cancer: overview	4	0.0154128	4.1411	CCNA2;GRIA3;LOC102287886;PLAU	Abomasum	G15m_G60d_down
bom03030	DNA replication	Genetic Information Processing	Replication and repair	2	0.015504	10.4617	MCM2;MCM5	Abomasum	G15m_G60d_down
bom04933	AGE-RAGE signaling pathway in diabetic complications	Human Diseases	Endocrine and metabolic disease	3	0.0159918	5.62564	COL1A1;COL1A2;COL3A1	Abomasum	G15m_G60d_down
bom05205	Proteoglycans in cancer	Human Diseases	Cancer: overview	4	0.018844	3.8975	COL1A1;COL1A2;GPC3;PLAU	Abomasum	G15m_G60d_down
bom05415	Diabetic cardiomyopathy	Human Diseases	Cardiovascular disease	4	0.0210493	3.7682	ATP2A3;COL1A1;COL1A2;COL3A1	Abomasum	G15m_G60d_down
bom04810	Regulation of actin cytoskeleton	Cellular Processes	Cell motility	4	0.0234082	3.64721	CHRM1;DIAPH3;IQGAP3;KNG1	Abomasum	G15m_G60d_down
bom04611	Platelet activation	Organismal Systems	Immune system	3	0.0241548	4.80902	COL1A1;COL1A2;COL3A1	Abomasum	G15m_G60d_down
bom05165	Human papillomavirus infection	Human Diseases	Infectious disease: viral	5	0.0267379	2.93175	CCNA2;COL1A1;COL1A2;E2F1;TNC	Abomasum	G15m_G60d_down
bom04926	Relaxin signaling pathway	Organismal Systems	Endocrine system	3	0.0278371	4.55205	COL1A1;COL1A2;COL3A1	Abomasum	G15m_G60d_down
bom04080	Neuroactive ligand-receptor interaction	Environmental Information Processing	Signaling molecules and interaction	5	0.0291922	2.86416	CHRM1;GRIA3;HTR1B;KNG1;SST	Abomasum	G15m_G60d_down
bom00240	Pyrimidine metabolism	Metabolism	Nucleotide metabolism	2	0.0300024	7.36195	ENTPD8;RRM2	Abomasum	G15m_G60d_down
bom00480	Glutathione metabolism	Metabolism	Metabolism of other amino acids	2	0.0375312	6.51714	GPX7;RRM2	Abomasum	G15m_G60d_down
bom00750	Vitamin B6 metabolism	Metabolism	Metabolism of cofactors and vitamins	1	0.0395609	24.8466	LOC102283927	Abomasum	G15m_G60d_down
bom04918	Thyroid hormone synthesis	Organismal Systems	Endocrine system	2	0.0544659	5.30061	GPX7;TTR	Abomasum	G15m_G60d_down
bom04110	Cell cycle	Cellular Processes	Cell growth and death	22	4.40574e-22	17.6169	BUB1;BUB1B;CCNA2;CCNB1;CCNB2;CDC20;CDC25B;CDK1;DBF4;E2F1;E2F2;ESPL1;MCM2;MCM3;MCM4;MCM5;MCM6;PCNA;PKMYT1;PTTG1;SFN;TTK	Abomasum	GAdult_15m_up
bom03030	DNA replication	Genetic Information Processing	Replication and repair	8	2.41408e-09	21.41	MCM2;MCM3;MCM4;MCM5;MCM6;PCNA;POLA2;POLE2	Abomasum	GAdult_15m_up
bom04114	Oocyte meiosis	Cellular Processes	Cell growth and death	11	4.13164e-08	8.73964	AURKA;BUB1;CCNB1;CCNB2;CDC20;CDK1;ESPL1;FBXO5;PKMYT1;PTTG1;SGOL1	Abomasum	GAdult_15m_up
bom04914	Progesterone-mediated oocyte maturation	Organismal Systems	Endocrine system	9	2.50899e-07	9.94869	AURKA;BUB1;CCNA2;CCNB1;CCNB2;CDC25B;CDK1;KIF22;PKMYT1	Abomasum	GAdult_15m_up
bom05166	Human T-cell leukemia virus 1 infection	Human Diseases	Infectious disease: viral	10	0.000114002	4.2374	BUB1B;CCNA2;CCNB2;CDC20;E2F1;E2F2;ESPL1;FDPS;LOC102269978;PTTG1	Abomasum	GAdult_15m_up
bom04115	p53 signaling pathway	Cellular Processes	Cell growth and death	6	0.000127304	7.62733	CCNB1;CCNB2;CDK1;GTSE1;RRM2;SFN	Abomasum	GAdult_15m_up
bom04218	Cellular senescence	Cellular Processes	Cell growth and death	8	0.000214682	4.90109	CCNA2;CCNB1;CCNB2;CDK1;E2F1;E2F2;FOXM1;MYBL2	Abomasum	GAdult_15m_up
bom04210	Apoptosis	Cellular Processes	Cell growth and death	5	0.0110847	3.71159	BIRC5;LMNB1;LMNB2;LOC102270684;LOC102273697	Abomasum	GAdult_15m_up
bom03460	Fanconi anemia pathway	Genetic Information Processing	Replication and repair	3	0.0143458	5.86717	FANCA;FANCD2;FANCI	Abomasum	GAdult_15m_up
bom00240	Pyrimidine metabolism	Metabolism	Nucleotide metabolism	3	0.0158772	5.64987	DUT;RRM2;TK1	Abomasum	GAdult_15m_up
bom00100	Steroid biosynthesis	Metabolism	Lipid metabolism	2	0.0161878	10.1698	LOC102282237;SQLE	Abomasum	GAdult_15m_up
bom00900	Terpenoid backbone biosynthesis	Metabolism	Metabolism of terpenoids and polyketides	2	0.0177787	9.68549	FDPS;HMGCS1	Abomasum	GAdult_15m_up
bom04972	Pancreatic secretion	Organismal Systems	Digestive system	4	0.0190424	3.91145	CPA3;LOC102270735;LOC102271020;PLA2G3	Abomasum	GAdult_15m_up
bom05161	Hepatitis B	Human Diseases	Infectious disease: viral	5	0.0224838	3.10054	BIRC5;CCNA2;E2F1;E2F2;PCNA	Abomasum	GAdult_15m_up
bom05206	MicroRNAs in cancer	Human Diseases	Cancer: overview	5	0.0224838	3.10054	CDC25B;CDCA5;E2F1;E2F2;STMN1	Abomasum	GAdult_15m_up
bom03430	Mismatch repair	Genetic Information Processing	Replication and repair	2	0.0247633	8.13581	EXO1;PCNA	Abomasum	GAdult_15m_up
bom04614	Renin-angiotensin system	Organismal Systems	Endocrine system	2	0.026658	7.8229	CPA3;LOC102282440	Abomasum	GAdult_15m_up
bom00983	Drug metabolism - other enzymes	Metabolism	Xenobiotics biodegradation and metabolism	3	0.0324973	4.29708	DUT;RRM2;TK1	Abomasum	GAdult_15m_up
bom04068	FoxO signaling pathway	Environmental Information Processing	Signal transduction	4	0.0370661	3.17805	CCNB1;CCNB2;PCK2;PLK4	Abomasum	GAdult_15m_up
bom03410	Base excision repair	Genetic Information Processing	Replication and repair	2	0.0437561	5.98222	PCNA;POLE2	Abomasum	GAdult_15m_up
bom03320	PPAR signaling pathway	Organismal Systems	Endocrine system	5	3.47125e-05	13.1677	CPT1A;HMGCS2;LPL;PLIN5;SLC27A1	Abomasum	GAdult_15m_down
bom05204	Chemical carcinogenesis - DNA adducts	Human Diseases	Cancer: overview	4	0.000167676	14.2211	LOC102264665;LOC102279786;LOC102280731;LOC102282831	Abomasum	GAdult_15m_down
bom00040	Pentose and glucuronate interconversions	Metabolism	Carbohydrate metabolism	3	0.000258686	23.7019	AKR1B1;LOC102264665;LOC102282831	Abomasum	GAdult_15m_down
bom00830	Retinol metabolism	Metabolism	Metabolism of cofactors and vitamins	4	0.000288353	12.3662	LOC102264665;LOC102279786;LOC102280731;LOC102282831	Abomasum	GAdult_15m_down
bom00140	Steroid hormone biosynthesis	Metabolism	Lipid metabolism	4	0.000321904	12.0179	LOC102264665;LOC102279786;LOC102280731;LOC102282831	Abomasum	GAdult_15m_down
bom00982	Drug metabolism - cytochrome P450	Metabolism	Xenobiotics biodegradation and metabolism	3	0.00246748	11.0336	FMO2;LOC102264665;LOC102282831	Abomasum	GAdult_15m_down
bom04142	Lysosome	Cellular Processes	Transport and catabolism	4	0.00353273	6.32051	ACP5;CTSH;LOC102269419;MANBA	Abomasum	GAdult_15m_down
bom00053	Ascorbate and aldarate metabolism	Metabolism	Carbohydrate metabolism	2	0.00600821	17.0654	LOC102264665;LOC102282831	Abomasum	GAdult_15m_down
bom04610	Complement and coagulation cascades	Organismal Systems	Immune system	3	0.00821512	7.19046	F5;FGA;PLG	Abomasum	GAdult_15m_down
bom04960	Aldosterone-regulated sodium reabsorption	Organismal Systems	Excretory system	2	0.0128738	11.5307	INSR;SCNN1A	Abomasum	GAdult_15m_down
bom00860	Porphyrin and chlorophyll metabolism	Metabolism	Metabolism of cofactors and vitamins	2	0.0135491	11.2272	LOC102264665;LOC102282831	Abomasum	GAdult_15m_down
bom04931	Insulin resistance	Human Diseases	Endocrine and metabolic disease	3	0.0142387	5.87111	CPT1A;INSR;SLC27A1	Abomasum	GAdult_15m_down
bom00591	Linoleic acid metabolism	Metabolism	Lipid metabolism	2	0.0163999	10.158	LOC102279786;LOC102280731	Abomasum	GAdult_15m_down
bom04979	Cholesterol metabolism	Organismal Systems	Digestive system	2	0.0219436	8.70682	LPL;LRP2	Abomasum	GAdult_15m_down
bom00980	Metabolism of xenobiotics by cytochrome P450	Metabolism	Xenobiotics biodegradation and metabolism	2	0.0339659	6.8812	LOC102264665;LOC102282831	Abomasum	GAdult_15m_down
bom00740	Riboflavin metabolism	Metabolism	Metabolism of cofactors and vitamins	1	0.0369078	26.6646	ACP5	Abomasum	GAdult_15m_down
bom04929	GnRH secretion	Organismal Systems	Endocrine system	2	0.0380803	6.46415	HCN2;SPP1	Abomasum	GAdult_15m_down
bom00561	Glycerolipid metabolism	Metabolism	Lipid metabolism	2	0.040206	6.27403	AKR1B1;LPL	Abomasum	GAdult_15m_down
bom00983	Drug metabolism - other enzymes	Metabolism	Xenobiotics biodegradation and metabolism	2	0.0434772	6.00893	LOC102264665;LOC102282831	Abomasum	GAdult_15m_down
bom00072	Synthesis and degradation of ketone bodies	Metabolism	Lipid metabolism	1	0.0548599	17.7764	HMGCS2	Abomasum	GAdult_15m_down
