# Supplementary material for: Transcriptome profiling in rumen, reticulum, omasum, and abomasum tissues during the developmental transition of pre-ruminant to the ruminant in yaks
Source: Frontiers journal article supplement (doi:10.3389/fvets.2023.1204706), 2023-09-22
Supplement: Data_Sheet_1.zip [file Table S14-The top 20 KEGG enrichment pathways of common DEmRNAs in abomasum.xls]

id	Term	Classification_level1	Classification_level2	ListHits	p-value	Enrichment_score	geneID	hyperlink_only_excel
bom04640	Hematopoietic cell lineage	Organismal Systems	Immune system	48	1.88425126583261e-17	3.66535701189167	CD19;CD1E;CD2;CD22;CD37;CD38;CD3E;CD3G;CD4;CD5;CD59;CD7;CD8A;CD8B;CR2;CSF1R;CSF3R;EPOR;FCER2;FLT3;IL1R2;IL2RA;IL6R;IL7;IL7R;ITGA2;ITGA3;ITGA4;ITGA5;ITGA6;ITGAM;KIT;KITLG;LOC102266138;LOC102268126;LOC102269342;LOC102271117;LOC102271676;LOC102282150;LOC102282998;LOC102283173;LOC102283463;LOC102284391;LOC102284739;LOC102285144;LOC102288394;MS4A1;TNF	=HYPERLINK("../../3.KEGG_map/VennData/bom04640.html","bom04640")
bom04612	Antigen processing and presentation	Organismal Systems	Immune system	38	6.58830577816355e-12	3.22061360156598	B2M;CALR;CD4;CD74;CD8A;CD8B;CIITA;CTSS;HSPA5;HSPA6;IFNG;LOC102268170;LOC102269342;LOC102269419;LOC102270654;LOC102271117;LOC102271676;LOC102272326;LOC102275624;LOC102275967;LOC102277245;LOC102278231;LOC102279719;LOC102280334;LOC102281193;LOC102282150;LOC102282998;LOC102283463;LOC102284391;LOC102284891;LOC102285144;LOC102286220;LOC102286791;PSME1;PSME2;TAP1;TAP2;TNF	=HYPERLINK("../../3.KEGG_map/VennData/bom04612.html","bom04612")
bom05340	Primary immunodeficiency	Human Diseases	Immune disease	22	3.38569547494122e-11	4.58582391915725	BLNK;BTK;CD19;CD3E;CD4;CD40LG;CD79A;CD8A;CD8B;CIITA;ICOS;IL2RG;IL7R;JAK3;LCK;LOC102268126;LOC102280800;LOC102283173;PTPRC;TAP1;TAP2;ZAP70	=HYPERLINK("../../3.KEGG_map/VennData/bom05340.html","bom05340")
bom04061	Viral protein interaction with cytokine and cytokine receptor	Environmental Information Processing	Signaling molecules and interaction	35	7.23285219171104e-11	3.1757443718228	CCL16;CCL20;CCL22;CCL28;CCL5;CCR10;CCR4;CCR7;CSF1R;CX3CR1;CXCL10;CXCL11;CXCL12;CXCL14;CXCR3;IL18RAP;IL22RA1;IL2RA;IL2RG;IL34;IL6R;LOC102264498;LOC102268679;LOC102271445;LOC102271913;LOC102284639;LOC102285534;LOC102287450;LOC102288203;LOC102288304;LOC106700824;TNF;TNFSF10;TNFSF14;XCR1	=HYPERLINK("../../3.KEGG_map/VennData/bom04061.html","bom04061")
bom04145	Phagosome	Cellular Processes	Transport and catabolism	52	2.38323138760539e-10	2.44543381941756	ATP6V1G3;C3;CALR;COLEC12;CORO1A;CTSS;DYNC1I1;FCAR;ITGA2;ITGA5;ITGAM;ITGB2;LOC102266138;LOC102268126;LOC102268170;LOC102269342;LOC102269419;LOC102270654;LOC102270684;LOC102270959;LOC102271117;LOC102271676;LOC102272326;LOC102273069;LOC102273538;LOC102273697;LOC102274112;LOC102275624;LOC102278231;LOC102281193;LOC102281195;LOC102282150;LOC102282998;LOC102283173;LOC102283463;LOC102284391;LOC102285144;…	=HYPERLINK("../../3.KEGG_map/VennData/bom04145.html","bom04145")
bom05330	Allograft rejection	Human Diseases	Immune disease	26	5.41773143506524e-10	3.64591951258618	CD40LG;CD80;FASLG;IFNG;LOC102268126;LOC102268170;LOC102269342;LOC102270654;LOC102271117;LOC102271676;LOC102272326;LOC102275624;LOC102278231;LOC102281193;LOC102282150;LOC102282998;LOC102283173;LOC102283463;LOC102284391;LOC102285144;LOC102285196;LOC102285463;LOC102286220;LOC102286791;PRF1;TNF	=HYPERLINK("../../3.KEGG_map/VennData/bom05330.html","bom05330")
bom04514	Cell adhesion molecules	Environmental Information Processing	Signaling molecules and interaction	50	9.35114077520299e-10	2.41016313932981	CD2;CD22;CD274;CD276;CD4;CD40LG;CD6;CD80;CD8A;CD8B;CDH2;CDH3;CLDN1;CLDN2;CLDN4;CLDN7;ICOS;ITGA4;ITGA6;ITGA8;ITGAL;ITGAM;ITGB2;LOC102268170;LOC102269342;LOC102270654;LOC102271117;LOC102271676;LOC102272326;LOC102275219;LOC102275624;LOC102278231;LOC102281193;LOC102282150;LOC102282998;LOC102283463;LOC102284391;LOC102285144;LOC102286220;LOC102286791;LRRC4;NRCAM;PDCD1;PDCD1LG2;PTPRC;SELL;SELPLG;SIGLEC1…	=HYPERLINK("../../3.KEGG_map/VennData/bom04514.html","bom04514")
bom00590	Arachidonic acid metabolism	Metabolism	Lipid metabolism	33	2.23864084029967e-09	2.95945613387474	ALOX5;EPHX2;GGT1;GPX1;GPX2;GPX7;GPX8;HPGDS;LOC102267155;LOC102271037;LOC102272527;LOC102272594;LOC102272882;LOC102275927;LOC102279309;LOC102279786;LOC102279872;LOC102280157;LOC102280721;LOC102280731;LOC102281471;LOC102282243;LOC102284205;LTA4H;LTC4S;PLA2G1B;PLA2G3;PLA2G4F;PLA2G5;PTGES;PTGIS;PTGS2;TBXAS1	=HYPERLINK("../../3.KEGG_map/VennData/bom00590.html","bom00590")
bom05332	Graft-versus-host disease	Human Diseases	Immune disease	28	2.57870065735278e-09	3.27197904975683	CD80;FASLG;IFNG;LOC102268170;LOC102269342;LOC102270654;LOC102271117;LOC102271676;LOC102272326;LOC102275624;LOC102275967;LOC102277245;LOC102278231;LOC102279719;LOC102280334;LOC102281193;LOC102282150;LOC102282998;LOC102283463;LOC102284391;LOC102284891;LOC102285144;LOC102285196;LOC102285463;LOC102286220;LOC102286791;PRF1;TNF	=HYPERLINK("../../3.KEGG_map/VennData/bom05332.html","bom05332")
bom04650	Natural killer cell mediated cytotoxicity	Organismal Systems	Immune system	44	3.73051646119808e-09	2.47701437969078	CD244;CD247;CD48;FASLG;IFNG;ITGAL;ITGB2;LAT;LCK;LCP2;LOC102268126;LOC102268170;LOC102270440;LOC102270654;LOC102272326;LOC102273538;LOC102275624;LOC102275967;LOC102277245;LOC102277959;LOC102278231;LOC102279719;LOC102280334;LOC102281193;LOC102283173;LOC102284891;LOC102285170;LOC102285196;LOC102285463;LOC102286220;LOC102286507;LOC102286791;PIK3CD;PLCG2;PRF1;PTK2B;RAC3;SH2D1A;SHC4;TNF;TNFSF10;VAV1;VA…	=HYPERLINK("../../3.KEGG_map/VennData/bom04650.html","bom04650")
bom04512	ECM-receptor interaction	Environmental Information Processing	Signaling molecules and interaction	33	6.19963190000565e-09	2.85969918554188	CHAD;COL1A1;COL1A2;COL4A1;COL4A2;COL4A3;COL4A4;COL4A5;COL6A1;COL6A2;COL6A5;COL6A6;ITGA10;ITGA11;ITGA2;ITGA3;ITGA4;ITGA5;ITGA6;ITGA8;ITGB4;ITGB6;LAMA2;LAMB1;LAMB3;LAMC1;LAMC2;LAMC3;LOC102266138;LOC102268113;SPP1;TNC;VWF	=HYPERLINK("../../3.KEGG_map/VennData/bom04512.html","bom04512")
bom05169	Epstein-Barr virus infection	Human Diseases	Infectious disease: viral	60	8.96204974099608e-09	2.09389738801503	B2M;BCL2L11;BLNK;BTK;CALR;CCNA2;CCNE2;CD19;CD247;CD3E;CD3G;CR2;CXCL10;DDX58;E2F2;EIF2AK2;ENTPD1;ENTPD3;FCER2;GADD45B;GADD45G;IKBKE;IRF7;IRF9;ISG15;ITGAL;JAK3;LOC102268126;LOC102268170;LOC102269342;LOC102270654;LOC102271117;LOC102271676;LOC102272326;LOC102272934;LOC102275624;LOC102277620;LOC102278231;LOC102281193;LOC102282150;LOC102282998;LOC102283173;LOC102283231;LOC102283463;LOC102283513;LOC1022…	=HYPERLINK("../../3.KEGG_map/VennData/bom05169.html","bom05169")
bom04060	Cytokine-cytokine receptor interaction	Environmental Information Processing	Signaling molecules and interaction	71	1.04293658698923e-07	1.84996305829639	BMP3;BMPR1B;CCL16;CCL20;CCL22;CCL28;CCL5;CCR10;CCR4;CCR7;CD27;CD4;CD40LG;CSF1R;CSF2RB;CSF3R;CX3CR1;CXCL10;CXCL11;CXCL12;CXCL14;CXCL17;CXCR3;CXCR6;EBI3;EDA;EPOR;FASLG;IFNG;IL12RB1;IL15;IL16;IL17RB;IL18RAP;IL1R2;IL21R;IL22RA1;IL2RA;IL2RG;IL32;IL34;IL6R;IL7;IL7R;INHA;LIF;LOC102264498;LOC102268679;LOC102271445;LOC102271913;LOC102284639;LOC102284739;LOC102284826;LOC102285534;LOC102287450;LOC102288203;…	=HYPERLINK("../../3.KEGG_map/VennData/bom04060.html","bom04060")
bom05320	Autoimmune thyroid disease	Human Diseases	Immune disease	25	1.31554188277083e-07	3.01270392416226	CD40LG;CD80;FASLG;LOC102268126;LOC102268170;LOC102269342;LOC102270654;LOC102271117;LOC102271676;LOC102272326;LOC102275624;LOC102278231;LOC102281193;LOC102282150;LOC102282998;LOC102283173;LOC102283463;LOC102284391;LOC102285144;LOC102285196;LOC102285463;LOC102286220;LOC102286791;PRF1;TPO	=HYPERLINK("../../3.KEGG_map/VennData/bom05320.html","bom05320")
bom04940	Type I diabetes mellitus	Human Diseases	Endocrine and metabolic disease	24	1.37928459599019e-07	3.08500881834215	CD80;FASLG;IFNG;LOC102268170;LOC102269342;LOC102270654;LOC102271117;LOC102271676;LOC102272326;LOC102275624;LOC102278231;LOC102281193;LOC102282150;LOC102282998;LOC102283463;LOC102284391;LOC102285144;LOC102285196;LOC102285463;LOC102286220;LOC102286791;PRF1;PTPRN;TNF	=HYPERLINK("../../3.KEGG_map/VennData/bom04940.html","bom04940")
bom04610	Complement and coagulation cascades	Organismal Systems	Immune system	30	3.51239734926531e-07	2.5997265323108	C1QA;C1QB;C1QC;C2;C3;C3AR1;C4BPA;C6;C8G;CD59;CFI;CR2;F11;F5;F7;FGA;ITGAM;ITGB2;KNG1;LOC102273222;PLAT;PLAU;PLAUR;PLG;SERPINA1;SERPINA5;SERPINE1;THBD;VSIG4;VWF	=HYPERLINK("../../3.KEGG_map/VennData/bom04610.html","bom04610")
bom05140	Leishmaniasis	Human Diseases	Infectious disease: parasitic	27	5.50829264088142e-07	2.70439084724799	C3;EEF1A2;FOS;IFNG;ITGA4;ITGAM;ITGB2;LOC102268126;LOC102269342;LOC102271117;LOC102271676;LOC102273538;LOC102274112;LOC102282150;LOC102282998;LOC102283173;LOC102283463;LOC102284391;LOC102285144;LOC102288244;MAPK12;MARCKSL1;NCF1;PTGS2;STAT1;TGFB3;TNF	=HYPERLINK("../../3.KEGG_map/VennData/bom05140.html","bom05140")
bom05204	Chemical carcinogenesis - DNA adducts	Human Diseases	Cancer: overview	23	6.21458095669234e-07	2.95646678424456	HPGDS;LOC102264374;LOC102264665;LOC102270864;LOC102273409;LOC102274807;LOC102276661;LOC102276699;LOC102279786;LOC102280157;LOC102280721;LOC102280731;LOC102281471;LOC102282379;LOC102282831;LOC102283235;LOC102283377;LOC102283655;LOC102284686;LOC102287938;MGST3;PTGS2;UGT2A1	=HYPERLINK("../../3.KEGG_map/VennData/bom05204.html","bom05204")
bom05150	Staphylococcus aureus infection	Human Diseases	Infectious disease: bacterial	32	1.461712804616e-06	2.37308370641704	C1QA;C1QB;C1QC;C2;C3;C3AR1;CFI;FCAR;ITGAL;ITGAM;ITGB2;KRT12;KRT18;KRT19;KRT20;KRT23;LOC102268126;LOC102269342;LOC102269519;LOC102271117;LOC102271676;LOC102273069;LOC102273538;LOC102274112;LOC102282150;LOC102282998;LOC102283173;LOC102283463;LOC102284391;LOC102285144;PLG;SELPLG	=HYPERLINK("../../3.KEGG_map/VennData/bom05150.html","bom05150")
bom04062	Chemokine signaling pathway	Organismal Systems	Immune system	47	2.44912727788124e-06	1.97004639214784	ADCY1;ADCY2;CCL16;CCL20;CCL22;CCL28;CCL5;CCR10;CCR4;CCR7;CX3CR1;CXCL10;CXCL11;CXCL12;CXCL14;CXCR3;CXCR6;DOCK2;GNG10;GNG13;ITK;JAK3;LOC102264498;LOC102268679;LOC102271445;LOC102271913;LOC102285534;LOC102287450;LOC102288203;LOC102288304;NCF1;PIK3CD;PIK3CG;PIK3R5;PIK3R6;PLCB2;PLCG2;PTK2B;RAC3;SHC4;STAT1;STAT2;TIAM1;VAV1;VAV3;WAS;XCR1	=HYPERLINK("../../3.KEGG_map/VennData/bom04062.html","bom04062")
