# Supplementary material for: Transcriptome profiling in rumen, reticulum, omasum, and abomasum tissues during the developmental transition of pre-ruminant to the ruminant in yaks
Source: Frontiers journal article supplement (doi:10.3389/fvets.2023.1204706), 2023-09-22
Supplement: Data_Sheet_1.zip [file Table S15-The top 20 mRNAs expressed in abomasum.xls]

id	S0d_Abo	S20d_Abo	S60d_Abo	S15m_Abo	Adult_Abo
LOC102273154	21476.5	32855.3	48735.5	116111.0	123255.0
LOC102281311	6422.89	24786.0	35570.4	90080.3	96349.9
LOC102273435	10934.6	6329.33	14627.7	46519.4	45313.7
LOC102277564	32282.5	56338.1	16884.5	671.806	102.976
LOC102273729	5403.48	6666.04	12323.4	33740.4	43047.7
TFF1	5651.28	4397.36	7376.87	7453.01	7723.97
TMSB10	4419.84	3572.65	4867.37	4388.86	5064.01
GKN1	15.8422	943.273	5187.09	5831.63	3863.02
LOC102287882	3251.85	2653.79	2331.74	2430.17	2204.38
ATP4B	1600.71	1770.81	2369.63	3078.3	2354.19
RPS2	2610.77	1779.61	1844.23	1475.98	1502.94
PGC	4.84552	303.532	2572.15	2711.12	3117.99
TFF2	2509.13	2585.53	2377.71	318.862	569.103
EEF1A1	2149.08	1823.77	1710.57	1407.67	1249.99
TPT1	1879.79	1632.78	1575.36	1640.88	1379.94
ATP4A	999.231	1076.21	1642.08	2366.51	1451.11
LOC102274399	2150.79	1405.3	1336.78	1064.14	1093.84
RPS3A	1978.84	1443.6	1305.74	1111.63	1029.57
RPLP0	2022.82	1374.09	1324.18	1025.62	970.198
RPS8	2010.72	1308.78	1196.39	974.632	873.868
