# Supplementary material for: Transcriptome profiling in rumen, reticulum, omasum, and abomasum tissues during the developmental transition of pre-ruminant to the ruminant in yaks
Source: Frontiers journal article supplement (doi:10.3389/fvets.2023.1204706), 2023-09-22
Supplement: Data_Sheet_1.zip [file Table S16-The KEGG pathway analysis of DEmRNAs among four stomachs.xls]

## Sheet: Table S16-The KEGG pathway anal
id	Term	Classification_level1	Classification_level2	ListHits	p-value	Enrichment_score	geneID	hyperlink_only_excel
bom04360	Axon guidance	Organismal Systems	Development and regeneration	91	5.32645e-10	1.75689	SEMA4G;RAC2;PAK6;ROBO1;SHH;PARD6G;BMPR1B;LOC102270098;TRPC6;EFNA3;FES;EPHA1;TRPC3;UNC5C;EPHA5;SRC;BMP7;PTCH1;LOC102280098;TRPC4;EPHA4;SEMA3D;BOC;LIMK2;SEMA4A;LOC102276028;SEMA4B;EPHB2;PAK1;LOC102268971;PLXNA1;UNC5A;SEMA3E;NEO1;PLXNA3;LOC102279399;ROBO2;PTPN11;LOC102275569;PIK3CA;PIK3R2;EFNB3;SEMA3A;PAK4;PLCG2;ITGB1;NTN4;NTN1;EPHB6;NFATC2;EPHA7;PLXNC1;NCK2;SEMA3G;ENAH;SEMA7A;GNAI3;GNAI1;RRAS;LOC10…	bom04360
bom05200	Pathways in cancer	Human Diseases	Cancer: overview	216	6.03081e-10	1.42096	FLT3;RASGRP3;JAK3;RAC2;LOC102266295;FGFR4;SHH;GADD45A;NKX3-1;CCND2;AR;CASP7;TRAF4;EGLN3;FZD10;PTGER4;FGF10;LOC102281969;FGFR2;LPAR3;PTGER3;WNT3A;IL15;FZD5;PLD1;LPAR6;LOC102288177;RASGRP1;ADCY7;PTCH1;MECOM;LAMB3;LOC102264374;HHIP;COL4A4;LOC102287042;LAMC3;MAP2K1;CASP8;KNG1;WNT7A;NOTCH1;LAMA1;ITGA3;MGST1;PDGFA;CCND3;AGT;GNG13;NQO1;LOC102274807;PIM1;TCF7L2;NOTCH2;EGLN1;FZD2;CALM3;EML4;RUNX1;PLD2;IL7…	bom05200
bom05165	Human papillomavirus infection	Human Diseases	Infectious disease: viral	147	7.18312e-10	1.54042	ATP6V1G3;CREB3L1;ATP6V1B1;LFNG;ATP6V1C2;DLG2;CREB3L3;HES2;IRF1;CREB3L4;PARD6G;CCND2;FZD10;PTGER4;COL6A5;LLGL2;IRF9;WNT3A;ISG15;MX1;FZD5;MX2;LAMB3;LOC102286791;RBPJL;TNC;COL4A4;LOC102287042;LAMC3;MAP2K1;HES4;THBS1;CASP8;LOC102268170;WNT7A;NOTCH1;LAMA1;CHAD;ITGA3;THBS4;CCND3;ITGB6;LOC102281193;TCF7L2;INADL;NOTCH2;FZD2;COL6A6;LOC102276028;MAML3;TLR3;STAT1;LLGL1;SLC9A3R1;WNT2B;LOC102284700;COL4A1;FN1…	bom05165
bom04510	Focal adhesion	Cellular Processes	Cellular community - eukaryotes	97	1.5353e-09	1.69745	RAC2;PIP5K1B;PAK6;VAV3;CCND2;COL6A5;SRC;LAMB3;TNC;COL4A4;LAMC3;MAP2K1;THBS1;LAMA1;CHAD;ITGA3;PDGFA;THBS4;CCND3;ITGB6;COL6A6;PAK1;LOC102268971;COL4A1;FN1;KDR;CCND1;COL4A3;ITGA1;ITGA7;PPP1R12A;LAMA3;PGF;PIK3CA;LAMC2;FLNC;PIK3R2;ITGA5;TLN1;PAK4;LOC102269868;ITGB1;ACTN1;PPP1CB;COL4A6;BCAR1;COL4A5;VEGFA;MYLK2;TNXB;ITGA8;LOC102277897;VAV1;ELK1;LAMC1;ITGAV;CAV3;CAV2;PIK3CB;COL4A2;COL9A1;FLNA;SHC4;MYL9;P…	bom04510
bom05205	Proteoglycans in cancer	Human Diseases	Cancer: overview	97	2.13068e-09	1.68913	IHH;SLC9A1;TIAM1;SHH;PLCE1;VAV3;FZD10;WNT3A;HPSE2;PDCD4;FZD5;GPC1;SRC;PTCH1;PLAU;ITPR3;CD63;LOC102287042;MAP2K1;THBS1;WNT7A;CD44;FZD2;MSN;PAK1;WNT2B;SDC1;LOC102284700;FN1;TWIST1;KDR;RRAS2;CCND1;PTPN6;WNT10A;PTPN11;PPP1R12A;PIK3CA;GAB1;FLNC;EZR;PIK3R2;ANK3;ITGA5;LOC102269868;ERBB3;ITPR1;PLCG2;ITGB1;FZD6;PPP1CB;VEGFA;TGFB2;MAPK14;LUM;VAV1;RRAS;ELK1;ITGAV;CAV3;LOC102280002;HCLS1;CAV2;PIK3CB;DCN;WNT3…	bom05205
bom04971	Gastric acid secretion	Organismal Systems	Digestive system	48	2.3326e-09	2.13144	CCKBR;SLC9A4;ATP4B;KCNE2;ATP4A;KCNQ1;KCNJ15;LOC102266781;KCNJ16;SLC9A1;ATP1B1;ATP1B3;SLC26A7;LOC102266295;CFTR;SST;HRH2;SSTR2;SLC4A2;KCNJ2;ADCY7;ITPR3;CALM3;ATP1A2;LOC102287375;ADCY6;LOC102286123;KCNK2;EZR;ITPR1;CHRM3;MYLK2;CALM1;GNAI3;GNAI1;LOC102280002;ADCY4;ADCY8;PRKCB;PLCB4;MYLK;LOC102271961;CAMK2G;CALML4;ATP1A3;ADCY5;MYLK3;ADCY3	bom04971
bom04024	cAMP signaling pathway	Environmental Information Processing	Signal transduction	108	9.4471e-09	1.60527	GHRL;TNNI3;CREB3L1;SLC9A1;LOC102275331;ATP1B1;SSTR1;ATP1B3;RAC2;LOC102266295;CREB3L3;ATP2A3;TIAM1;CFTR;PLCE1;SST;VAV3;CREB3L4;SSTR2;PTGER3;EDN3;GIPR;PPP1R1B;PLD1;ADCY7;PTCH1;HHIP;MAP2K1;VIPR2;NPR1;CALM3;PLD2;ATP1A2;PAK1;PDE3A;HTR1B;CRHR2;PDE4A;LOC102287375;LOC102287322;GRIN2C;RRAS2;LOC102285991;LIPE;LOC102278645;ADCY6;CHRM1;LOC102286123;PPP1R12A;GPR119;PIK3CA;PIK3R2;CACNA1D;LOC102283461;ADRB1;PPP…	bom04024
bom04022	cGMP-PKG signaling pathway	Environmental Information Processing	Signal transduction	82	3.23401e-08	1.69358	GATA4;CREB3L1;ATP1B1;ATP1B3;LOC102266295;CREB3L3;ATP2A3;CREB3L4;TRPC6;ADRA1A;PPIF;ADCY7;ITPR3;MAP2K1;KNG1;NPR1;CALM3;OPRD1;ATP1A2;PDE3A;LOC102287375;EDNRB;LOC102285991;RGS2;SLC8A2;ADCY6;PIK3CG;PIK3R5;PPP1R12A;PRKCE;LOC102283594;SLC25A4;KCNMB4;CACNA1D;ITPR1;ADRB1;PPP1CB;NFATC2;LOC106700711;BDKRB2;CACNA1S;CREB3;CREB3L2;MYLK2;CREB5;PRKG2;CALM1;KCNMA1;GNAI3;GNAI1;ATP2A2;ADCY4;KCNJ8;ATP2B2;KCNMB2;LOC1…	bom04022
bom04020	Calcium signaling pathway	Environmental Information Processing	Signal transduction	110	6.84786e-08	1.55065	CCKBR;ITPKA;PTK2B;LOC102283173;LOC102266295;ATP2A3;FGFR4;PLCE1;HRH2;LOC102270277;FGF10;FGFR2;ADRA1A;PTGER3;PPIF;GNA14;ADCY7;ITPR3;PHKG2;CACNA1E;SPHK1;PDGFA;P2RX3;CALM3;ITPKB;FGF9;STIM2;FGF20;ITPKC;LOC102287375;GRIN2C;KDR;EDNRB;HRC;NTRK2;ORAI2;STIM1;MST1R;LOC102268465;SLC8A2;CHRM1;LOC102286123;RET;P2RX5;BDKRB1;CAMK1D;PHKA2;FGF7;MCU;P2RX4;SLC25A4;CACNA1D;CASQ1;LOC102269868;ERBB3;ITPR1;PLCG2;TRDN;AD…	bom04020
bom04261	Adrenergic signaling in cardiomyocytes	Organismal Systems	Circulatory system	73	4.58747e-07	1.66234	TNNI3;KCNQ1;CREB3L1;SLC9A1;ATP1B1;ATP1B3;LOC102266295;LOC102286497;CREB3L3;ATP2A3;CREB3L4;ADRA1A;CACNA2D3;SCN1B;ADCY7;PPP1R1A;SCN5A;AGT;CALM3;ATP1A2;LOC102287375;PPP2R5A;SLC8A2;ADCY6;TPM3;PIK3CG;LOC102286123;PIK3R5;PPP2R2C;CACNA1D;ADRB1;ACTC1;PPP1CB;RYR2;CACNA1S;CREB3;CREB3L2;CACNG7;PPP2R2A;MAPK14;PPP2R2D;CREB5;CALM1;GNAI3;GNAI1;LOC102280002;ATP2A2;ADCY4;ATP2B2;ATP2B4;CACNB2;SLC8A3;PPP2R5D;PPP2R3…	bom04261
bom04972	Pancreatic secretion	Organismal Systems	Digestive system	53	6.56728e-07	1.81036	KCNQ1;LOC102266781;CLCA2;SLC9A1;ATP1B1;SLC26A3;ATP1B3;SLC4A4;LOC102265754;CLCA1;CPB1;BST1;ATP2A3;CFTR;SLC4A2;PLA2G1B;LOC102286947;ADCY7;ITPR3;SLC12A2;ATP1A2;CPA3;PLA2G2C;LOC102270735;LOC102275927;SCTR;RAB27B;ADCY6;LOC102286123;ITPR1;LOC102271020;CHRM3;RYR2;LOC102287233;LOC102274302;PRSS2;KCNMA1;CLCA4;ATP2A2;ADCY4;ATP2B2;ATP2B4;ADCY8;PRKCB;CCKAR;PLA2G12A;PLCB4;LOC102282347;PLA2G5;ATP1A3;ADCY5;CD38…	bom04972
bom05412	Arrhythmogenic right ventricular cardiomyopathy	Human Diseases	Cardiovascular disease	41	7.13023e-07	1.96822	GJA1;DSG2;ATP2A3;LOC102266197;DSP;CACNA2D3;LAMA1;ITGA3;PKP2;ITGB6;TCF7L2;JUP;ITGA1;ITGA7;SLC8A2;LOC102272596;ITGA5;CACNA1D;ITGB1;RYR2;LEF1;CACNA1S;DES;CACNG7;ITGA8;EMD;ACTN3;ITGAV;SGCB;ATP2A2;CACNB2;SLC8A3;ITGB3;ITGB7;CACNA1C;SLC8A1;ITGA4;TCF7;ITGA2;CDH2;ITGB5	bom05412
bom04512	ECM-receptor interaction	Environmental Information Processing	Signaling molecules and interaction	47	7.4331e-07	1.87598	COL6A5;LOC102266138;LAMB3;TNC;COL4A4;LAMC3;THBS1;LAMA1;CHAD;ITGA3;THBS4;CD44;ITGB6;COL6A6;SDC1;COL4A1;FN1;COL4A3;ITGA1;ITGA7;LAMA3;LAMC2;ITGA5;ITGB1;COL4A6;COL4A5;TNXB;ITGA8;LAMC1;ITGAV;COL4A2;COL9A1;NPNT;LOC102283468;THBS3;ITGB3;COL9A2;ITGB7;LOC102268113;FREM2;ITGA4;SPP1;ITGA2;HSPG2;COL6A2;SV2C;ITGB5	bom04512
bom05414	Dilated cardiomyopathy	Human Diseases	Cardiovascular disease	50	8.69704e-07	1.83113	TNNI3;MYBPC3;LOC102283173;ATP2A3;CACNA2D3;ADCY7;LAMA1;ITGA3;AGT;ITGB6;ITGA1;ITGA7;SLC8A2;ADCY6;TPM3;LOC102286123;ITGA5;CACNA1D;ADRB1;ACTC1;ITGB1;RYR2;TGFB3;CACNA1S;DES;CACNG7;TGFB2;ITGA8;EMD;LOC102268126;ITGAV;SGCB;ATP2A2;ADCY4;CACNB2;SLC8A3;ADCY8;ITGB3;ITGB7;CACNA1C;SLC8A1;ITGA4;LOC102278406;ITGA2;TPM1;ADCY5;TPM2;ADCY3;ITGB5;PLN	bom05414
bom04270	Vascular smooth muscle contraction	Organismal Systems	Circulatory system	67	1.27719e-06	1.66441	LOC102265754;LOC102266295;PRKCD;PLA2G1B;ADRA1A;ACTA2;EDN3;ADCY7;PLA2G4E;ITPR3;MAP2K1;PLA2G4D;MYH10;NPR1;AGT;PLA2G4A;CALM3;MYL6B;PLA2G2C;LOC102287375;LOC102275927;RAMP3;PLA2G6;ADCY6;LOC102286123;PPP1R12A;PRKCE;PLA2G4F;LOC102283594;KCNMB4;CACNA1D;ITPR1;RAMP2;PRKCQ;PPP1CB;LOC102267990;CACNA1S;MYLK2;CALD1;CALM1;KCNMA1;ADCY4;KCNMB2;ACTG2;MYL9;LOC102264614;ADCY8;PRKCB;MRVI1;PPP1R12C;LOC102286095;PLA2G1…	bom04270
bom04924	Renin secretion	Organismal Systems	Endocrine system	42	1.45893e-06	1.91283	CLCA2;CLCA1;LOC102266295;PTGER4;KCNJ2;EDN3;ITPR3;NPR1;AGT;CALM3;PDE3A;LOC102270735;LOC102287375;LOC102285991;ADCY6;LOC102286123;LOC102266786;CTSB;CACNA1D;ITPR1;ADRB1;LOC102271020;CACNA1S;PRKG2;CALM1;KCNMA1;GNAI3;LOC102273543;GNAI1;CLCA4;LOC102270503;PDE1B;PLCB4;CACNA1C;LOC102271961;CALML4;ADCY5;REN;AQP1;EDN2;PDE1C;ADCYAP1R1	bom04924
bom00590	Arachidonic acid metabolism	Metabolism	Lipid metabolism	45	1.78003e-06	1.85881	LOC102283454;LOC102282352;LOC102272308;LOC102265754;LOC102269337;LOC102280731;LTA4H;GGT1;LOC102280157;LOC102279872;PLA2G1B;LOC102272594;ALOX5;GGT5;EPHX2;GPX2;PLA2G4E;LOC102267155;PLA2G4D;LOC102275513;TBXAS1;ALOX12;PLA2G4A;LOC102281471;PLA2G2C;LOC102271453;LOC102275927;PLA2G6;FAM213B;PLA2G4F;LOC102284205;ALOX12B;GPX1;LOC102282243;LTC4S;LOC102272527;LOC102268257;LOC102271037;LOC102286095;PLA2G12A;P…	bom00590
bom04151	PI3K-Akt signaling pathway	Environmental Information Processing	Signal transduction	145	2.21222e-06	1.3884	FLT3;SGK2;CREB3L1;JAK3;PRLR;LOC102283173;CREB3L3;FGFR4;PIK3AP1;CREB3L4;CCND2;FGF10;COL6A5;FGFR2;EFNA3;LPAR3;LPAR6;LAMB3;PKN1;TNC;COL4A4;LAMC3;MAP2K1;THBS1;LAMA1;CHAD;ITGA3;PDGFA;EREG;THBS4;CCND3;GNG13;ITGB6;COL6A6;IL7;TEK;FGF9;LPAR2;FGF20;COL4A1;EPOR;FN1;GNB5;THEM4;KDR;CCND1;NGFR;NTRK2;PPP2R5A;COL4A3;ITGA1;ITGA7;CHRM1;PIK3CG;PIK3R5;LAMA3;PGF;PIK3CA;LAMC2;PIK3R2;EPO;CD19;PPP2R2C;FGF7;ITGA5;LOC1022…	bom04151
bom04810	Regulation of actin cytoskeleton	Cellular Processes	Cell motility	93	2.37914e-06	1.51547	SLC9A1;ARHGEF4;RAC2;PIP5K1B;IQGAP2;PAK6;FGFR4;TIAM1;VAV3;INSRR;SPATA13;FGF10;FGFR2;SRC;MAP2K1;KNG1;MYH10;LIMK2;ITGA3;PDGFA;PIKFYVE;ITGB6;MSN;ITGAD;CYFIP2;BAIAP2;PAK1;FGF9;F2;LOC102268971;LPAR2;FGF20;FN1;RRAS2;ITGA1;ITGA7;CHRM1;PPP1R12A;PIK3CA;FGD3;EZR;PIK3R2;BDKRB1;PFN2;FGF7;ITGA5;PAK4;LOC102269868;ITGB1;ACTN1;PPP1CB;CHRM3;BCAR1;BDKRB2;ITGAL;GNG12;MYLK2;FGF5;ITGA8;ENAH;LOC102277897;VAV1;RRAS;SCIN…	bom04810
bom00600	Sphingolipid metabolism	Metabolism	Lipid metabolism	30	2.39091e-06	2.13144	UGT8;GAL3ST1;SMPD3;ASAH2;CERS1;ASAH2B;GALC;DEGS1;SPHK1;CERS3;SMPD2;PLPP2;CERS4;GBA2;SGPP2;ACER2;GLB1;CERK;NEU2;SPTLC3;SGMS1;SGPL1;ASAH1;SGMS2;SPTLC2;PSAP;SGPP1;GLA;SPTLC1;B4GALT6	bom00600
