# Supplementary material for: Transcriptome profiling in rumen, reticulum, omasum, and abomasum tissues during the developmental transition of pre-ruminant to the ruminant in yaks
Source: Frontiers journal article supplement (doi:10.3389/fvets.2023.1204706), 2023-09-22
Supplement: Data_Sheet_1.zip [file Table S17-The KEGG enrichment in mRNAs module profile 41 of STEM in rumen, reticulum, omasum and abomasum.xls]

## Sheet: Rumen
Term_ID	Term_description	ListHit	ListTotal	PopHit	PopTotal	GeneRatio	BgRatio	Enrichment_score	GeneIds	GeneSymbols	p-value	FDR_bh	Classification_level1
path:hsa00280	Valine, leucine and isoleucine degradation	13	102	48	7246	0.127451	0.00662434	19.2398	4594;56922;3032;593;1738;3155;26275;10449;36;3033;1892;38;64087	MUT;MCCC1;HADHB;BCKDHA;DLD;HMGCL;HIBCH;ACAA2;ACADSB;HADH;ECHS1;ACAT1;MCCC2	5.00203e-14	7.35299e-12	Metabolism
path:hsa00020	Citrate cycle (TCA cycle)	11	102	31	7246	0.107843	0.00427822	25.2075	3417;8801;5160;1737;6391;1738;6392;4191;1743;5106;3420	IDH1;SUCLG2;PDHA1;DLAT;SDHC;DLD;SDHD;MDH2;DLST;PCK2;IDH3B	1.66393e-13	1.22299e-11	Metabolism
path:hsa00640	Propanoate metabolism	9	102	32	7246	0.0882353	0.00441623	19.9798	4594;8801;593;1738;26275;1892;55902;55862;38	MUT;SUCLG2;BCKDHA;DLD;HIBCH;ECHS1;ACSS2;ECHDC1;ACAT1	3.25581e-10	1.59535e-08	Metabolism
path:hsa00620	Pyruvate metabolism	9	102	40	7246	0.0882353	0.00552029	15.9838	5160;1737;1738;55902;4191;38;5106;4199;10873	PDHA1;DLAT;DLD;ACSS2;MDH2;ACAT1;PCK2;ME1;ME3	2.8919e-09	1.06277e-07	Metabolism
path:hsa04146	Peroxisome	11	102	83	7246	0.107843	0.0114546	9.41484	3417;55825;8504;3155;11001;8309;54677;373156;390916;1891;83594	IDH1;PECR;PEX3;HMGCL;SLC27A2;ACOX2;CROT;GSTK1;NUDT19;ECH1;NUDT12	1.73362e-08	5.09685e-07	Cellular Processes
path:hsa00630	Glyoxylate and dicarboxylate metabolism	6	102	30	7246	0.0588235	0.00414022	14.2078	4594;1738;132158;55902;4191;38	MUT;DLD;GLYCTK;ACSS2;MDH2;ACAT1	3.03051e-06	7.42474e-05	Metabolism
path:hsa00071	Fatty acid degradation	6	102	44	7246	0.0588235	0.00607232	9.68717	3032;10449;1892;36;3033;38	HADHB;ACAA2;ECHS1;ACADSB;HADH;ACAT1	3.07196e-05	0.000645111	Metabolism
path:hsa00380	Tryptophan metabolism	5	102	40	7246	0.0490196	0.00552029	8.8799	51166;4128;1892;3033;38	AADAT;MAOA;ECHS1;HADH;ACAT1	0.000222899	0.00409577	Metabolism
path:hsa00650	Butanoate metabolism	4	102	28	7246	0.0392157	0.0038642	10.1485	3155;1892;3033;38	HMGCL;ECHS1;HADH;ACAT1	0.00058446	0.00954618	Metabolism
path:hsa00062	Fatty acid elongation	4	102	30	7246	0.0392157	0.00414022	9.4719	10449;3032;1892;3033	ACAA2;HADHB;ECHS1;HADH	0.000765578	0.011254	Metabolism
path:hsa00310	Lysine degradation	5	102	59	7246	0.0490196	0.00814242	6.02027	51166;1892;3033;1743;38	AADAT;ECHS1;HADH;DLST;ACAT1	0.00137306	0.0183491	Metabolism
path:hsa04216	Ferroptosis	4	102	40	7246	0.0392157	0.00552029	7.10392	2495;55240;2937;10533	FTH1;STEAP3;GSS;ATG7	0.0022925	0.0280832	Cellular Processes
path:hsa00010	Glycolysis / Gluconeogenesis	5	102	69	7246	0.0490196	0.0095225	5.14777	5160;1737;1738;55902;5106	PDHA1;DLAT;DLD;ACSS2;PCK2	0.00275921	0.0312003	Metabolism
path:hsa00480	Glutathione metabolism	4	102	53	7246	0.0392157	0.00731438	5.36145	3417;4259;2937;373156	IDH1;MGST3;GSS;GSTK1	0.00639033	0.0670985	Metabolism
path:hsa00072	Synthesis and degradation of ketone bodies	2	102	10	7246	0.0196078	0.00138007	14.2078	3155;38	HMGCL;ACAT1	0.00820342	0.0803935	Metabolism
path:hsa00130	Ubiquinone and other terpenoid-quinone biosynthesis	2	102	11	7246	0.0196078	0.00151808	12.9162	51004;1728	COQ6;NQO1	0.00993491	0.091277	Metabolism
path:hsa05230	Central carbon metabolism in cancer	4	102	65	7246	0.0392157	0.00897047	4.37164	3417;23410;5160;51548	IDH1;SIRT3;PDHA1;SIRT6	0.013001	0.11242	Human Diseases
path:hsa00260	Glycine, serine and threonine metabolism	3	102	40	7246	0.0294118	0.00552029	5.32794	1738;4128;132158	DLD;MAOA;GLYCTK	0.0183566	0.149913	Metabolism
path:hsa03320	PPAR signaling pathway	4	102	74	7246	0.0392157	0.0102125	3.83996	8309;11001;5106;4199	ACOX2;SLC27A2;PCK2;ME1	0.0200827	0.155377	Organismal Systems
path:hsa00270	Cysteine and methionine metabolism	3	102	47	7246	0.0294118	0.00648634	4.53442	7263;2937;4191	TST;GSS;MDH2	0.0280806	0.206393	Metabolism
path:hsa05012	Parkinson disease	5	102	129	7246	0.0490196	0.0178029	2.75346	65018;6391;6392;7416;4719	PINK1;SDHC;SDHD;VDAC1;NDUFS1	0.0350071	0.24505	Human Diseases
path:hsa00900	Terpenoid backbone biosynthesis	2	102	22	7246	0.0196078	0.00303616	6.45811	57107;38	PDSS2;ACAT1	0.0377497	0.252237	Metabolism
path:hsa00340	Histidine metabolism	2	102	23	7246	0.0196078	0.00317417	6.17732	3067;4128	HDC;MAOA	0.0409726	0.261869	Metabolism
path:hsa00760	Nicotinate and nicotinamide metabolism	2	102	30	7246	0.0196078	0.00414022	4.73595	83594;23530	NUDT12;NNT	0.0661444	0.383418	Metabolism
path:hsa00410	beta-Alanine metabolism	2	102	31	7246	0.0196078	0.00427822	4.58318	26275;1892	HIBCH;ECHS1	0.0700753	0.383418	Metabolism
path:hsa04710	Circadian rhythm	2	102	31	7246	0.0196078	0.00427822	4.58318	79365;9572	BHLHE41;NR1D1	0.0700753	0.383418	Organismal Systems
path:hsa00982	Drug metabolism - cytochrome P450	3	102	68	7246	0.0294118	0.00938449	3.13408	4128;373156;4259	MAOA;GSTK1;MGST3	0.0704238	0.383418	Metabolism
path:hsa04122	Sulfur relay system	1	102	8	7246	0.00980392	0.00110406	8.8799	7263	TST	0.107268	0.563159	Genetic Information Processing
path:hsa00920	Sulfur metabolism	1	102	9	7246	0.00980392	0.00124206	7.89325	7263	TST	0.119849	0.603567	Metabolism
path:hsa05016	Huntington disease	5	102	187	7246	0.0490196	0.0258073	1.89944	55081;6391;6392;7416;4719	IFT57;SDHC;SDHD;VDAC1;NDUFS1	0.123177	0.603567	Human Diseases
path:hsa04932	Non-alcoholic fatty liver disease (NAFLD)	4	102	145	7246	0.0392157	0.020011	1.9597	6392;6391;4719;51085	SDHD;SDHC;NDUFS1;MLXIPL	0.147288	0.698429	Human Diseases
path:hsa04979	Cholesterol metabolism	2	102	50	7246	0.0196078	0.00690036	2.84157	6272;7416	SORT1;VDAC1	0.15602	0.716717	Organismal Systems
path:hsa04978	Mineral absorption	2	102	51	7246	0.0196078	0.00703837	2.78585	1181;2495	CLCN2;FTH1	0.160974	0.717066	Organismal Systems
path:hsa04066	HIF-1 signaling pathway	3	102	100	7246	0.0294118	0.0138007	2.13118	818;5160;54583	CAMK2G;PDHA1;EGLN1	0.1663	0.719004	Environmental Information Processing
path:hsa04922	Glucagon signaling pathway	3	102	103	7246	0.0294118	0.0142147	2.0691	818;5160;5106	CAMK2G;PDHA1;PCK2	0.176709	0.742178	Organismal Systems
path:hsa04714	Thermogenesis	5	102	216	7246	0.0490196	0.0298096	1.64443	6391;55471;6392;51548;4719	SDHC;NDUFAF7;SDHD;SIRT6;NDUFS1	0.187889	0.758289	Organismal Systems
path:hsa04931	Insulin resistance	3	102	107	7246	0.0294118	0.0147668	1.99175	11001;5106;51085	SLC27A2;PCK2;MLXIPL	0.190862	0.758289	Human Diseases
path:hsa00730	Thiamine metabolism	1	102	16	7246	0.00980392	0.00220811	4.43995	204	AK2	0.203131	0.768606	Metabolism
path:hsa00561	Glycerolipid metabolism	2	102	61	7246	0.0196078	0.00841844	2.32915	132158;57678	GLYCTK;GPAM	0.211822	0.768606	Metabolism
path:hsa00360	Phenylalanine metabolism	1	102	17	7246	0.00980392	0.00234612	4.17878	4128	MAOA	0.214373	0.768606	Metabolism
path:hsa00120	Primary bile acid biosynthesis	1	102	17	7246	0.00980392	0.00234612	4.17878	8309	ACOX2	0.214373	0.768606	Metabolism
path:hsa04360	Axon guidance	4	102	175	7246	0.0392157	0.0241513	1.62375	84552;818;7223;90249	PARD6G;CAMK2G;TRPC4;UNC5A	0.232366	0.793438	Organismal Systems
path:hsa04722	Neurotrophin signaling pathway	3	102	119	7246	0.0294118	0.0164229	1.7909	818;6272;4145	CAMK2G;SORT1;MATK	0.234863	0.793438	Organismal Systems
path:hsa00190	Oxidative phosphorylation	3	102	120	7246	0.0294118	0.0165609	1.77598	6392;6391;4719	SDHD;SDHC;NDUFS1	0.238614	0.793438	Metabolism
path:hsa00670	One carbon pool by folate	1	102	20	7246	0.00980392	0.00276014	3.55196	4522	MTHFD1	0.247166	0.793438	Metabolism
path:hsa05031	Amphetamine addiction	2	102	68	7246	0.0196078	0.00938449	2.08939	818;4128	CAMK2G;MAOA	0.248287	0.793438	Human Diseases
path:hsa04020	Calcium signaling pathway	4	102	182	7246	0.0392157	0.0251173	1.5613	818;90550;7416;6262	CAMK2G;MCU;VDAC1;RYR2	0.253799	0.793797	Environmental Information Processing
path:hsa00980	Metabolism of xenobiotics by cytochrome P450	2	102	72	7246	0.0196078	0.00993652	1.97331	4259;373156	MGST3;GSTK1	0.269242	0.807725	Metabolism
path:hsa05412	Arrhythmogenic right ventricular cardiomyopathy (ARVC)	2	102	72	7246	0.0196078	0.00993652	1.97331	2697;6262	GJA1;RYR2	0.269242	0.807725	Human Diseases
path:hsa04964	Proximal tubule bicarbonate reclamation	1	102	23	7246	0.00980392	0.00317417	3.08866	5106	PCK2	0.278602	0.819091	Organismal Systems
path:hsa04977	Vitamin digestion and absorption	1	102	24	7246	0.00980392	0.00331217	2.95997	25974	MMACHC	0.28879	0.832394	Organismal Systems
path:hsa05204	Chemical carcinogenesis	2	102	80	7246	0.0196078	0.0110406	1.77598	4259;373156	MGST3;GSTK1	0.311078	0.875133	Human Diseases
path:hsa04966	Collecting duct acid secretion	1	102	27	7246	0.00980392	0.00372619	2.63108	10723	SLC12A7	0.318504	0.875133	Organismal Systems
path:hsa04742	Taste transduction	2	102	82	7246	0.0196078	0.0113166	1.73266	9568;8645	GABBR2;KCNK5	0.321478	0.875133	Organismal Systems
path:hsa04911	Insulin secretion	2	102	85	7246	0.0196078	0.0117306	1.67151	818;6262	CAMK2G;RYR2	0.337006	0.88464	Organismal Systems
path:hsa04012	ErbB signaling pathway	2	102	85	7246	0.0196078	0.0117306	1.67151	685;818	BTC;CAMK2G	0.337006	0.88464	Environmental Information Processing
path:hsa00030	Pentose phosphate pathway	1	102	30	7246	0.00980392	0.00414022	2.36797	132158	GLYCTK	0.346989	0.894867	Metabolism
path:hsa04970	Salivary secretion	2	102	90	7246	0.0196078	0.0124206	1.57865	362;54831	AQP5;BEST2	0.362647	0.910207	Organismal Systems
path:hsa04136	Autophagy - other	1	102	32	7246	0.00980392	0.00441623	2.21998	10533	ATG7	0.365321	0.910207	Cellular Processes
path:hsa00500	Starch and sucrose metabolism	1	102	35	7246	0.00980392	0.00483025	2.02969	178	AGL	0.391867	0.934429	Metabolism
path:hsa04713	Circadian entrainment	2	102	96	7246	0.0196078	0.0132487	1.47998	818;6262	CAMK2G;RYR2	0.392925	0.934429	Organismal Systems
path:hsa04217	Necroptosis	3	102	162	7246	0.0294118	0.0223572	1.31554	818;2495;7416	CAMK2G;FTH1;VDAC1	0.400093	0.934429	Cellular Processes
path:hsa00350	Tyrosine metabolism	1	102	36	7246	0.00980392	0.00496826	1.97331	4128	MAOA	0.400469	0.934429	Metabolism
path:hsa05010	Alzheimer disease	3	102	164	7246	0.0294118	0.0226332	1.2995	6392;6391;4719	SDHD;SDHC;NDUFS1	0.407708	0.936455	Human Diseases
path:hsa05033	Nicotine addiction	1	102	40	7246	0.00980392	0.00552029	1.77598	57030	SLC17A7	0.433689	0.958824	Human Diseases
path:hsa04726	Serotonergic synapse	2	102	113	7246	0.0196078	0.0155948	1.25733	4128;6532	MAOA;SLC6A4	0.474888	0.958824	Organismal Systems
path:hsa04913	Ovarian steroidogenesis	1	102	49	7246	0.00980392	0.00676235	1.44978	3294	HSD17B2	0.501917	0.958824	Organismal Systems
path:hsa00330	Arginine and proline metabolism	1	102	49	7246	0.00980392	0.00676235	1.44978	4128	MAOA	0.501917	0.958824	Metabolism
path:hsa05030	Cocaine addiction	1	102	49	7246	0.00980392	0.00676235	1.44978	4128	MAOA	0.501917	0.958824	Human Diseases
path:hsa04114	Oocyte meiosis	2	102	124	7246	0.0196078	0.0171129	1.14579	818;64506	CAMK2G;CPEB1	0.524305	0.958824	Cellular Processes
path:hsa04024	cAMP signaling pathway	3	102	199	7246	0.0294118	0.0274634	1.07094	818;6262;9568	CAMK2G;RYR2;GABBR2	0.534836	0.958824	Environmental Information Processing
path:hsa05134	Legionellosis	1	102	55	7246	0.00980392	0.00759039	1.29162	51128	SAR1B	0.542813	0.958824	Human Diseases
path:hsa04728	Dopaminergic synapse	2	102	131	7246	0.0196078	0.0180789	1.08457	818;4128	CAMK2G;MAOA	0.554112	0.958824	Organismal Systems
path:hsa00140	Steroid hormone biosynthesis	1	102	60	7246	0.00980392	0.00828043	1.18399	3294	HSD17B2	0.574339	0.958824	Metabolism
path:hsa05418	Fluid shear stress and atherosclerosis	2	102	136	7246	0.0196078	0.018769	1.04469	4259;1728	MGST3;NQO1	0.574594	0.958824	Human Diseases
path:hsa04721	Synaptic vesicle cycle	1	102	63	7246	0.00980392	0.00869445	1.12761	57030	SLC17A7	0.592211	0.958824	Organismal Systems
path:hsa05321	Inflammatory bowel disease (IBD)	1	102	63	7246	0.00980392	0.00869445	1.12761	3595	IL12RB2	0.592211	0.958824	Human Diseases
path:hsa04723	Retrograde endocannabinoid signaling	2	102	141	7246	0.0196078	0.019459	1.00765	57030;4719	SLC17A7;NDUFS1	0.594393	0.958824	Organismal Systems
path:hsa04137	Mitophagy - animal	1	102	65	7246	0.00980392	0.00897047	1.09291	65018	PINK1	0.603711	0.958824	Cellular Processes
path:hsa04261	Adrenergic signaling in cardiomyocytes	2	102	144	7246	0.0196078	0.019873	0.986656	818;6262	CAMK2G;RYR2	0.605944	0.958824	Organismal Systems
path:hsa04310	Wnt signaling pathway	2	102	146	7246	0.0196078	0.020149	0.97314	818;6422	CAMK2G;SFRP1	0.613506	0.958824	Environmental Information Processing
path:hsa04720	Long-term potentiation	1	102	67	7246	0.00980392	0.00924648	1.06029	818	CAMK2G	0.61489	0.958824	Organismal Systems
path:hsa00830	Retinol metabolism	1	102	67	7246	0.00980392	0.00924648	1.06029	216	ALDH1A1	0.61489	0.958824	Metabolism
path:hsa04920	Adipocytokine signaling pathway	1	102	69	7246	0.00980392	0.0095225	1.02955	5106	PCK2	0.625756	0.958824	Organismal Systems
path:hsa05211	Renal cell carcinoma	1	102	69	7246	0.00980392	0.0095225	1.02955	54583	EGLN1	0.625756	0.958824	Human Diseases
path:hsa04080	Neuroactive ligand-receptor interaction	4	102	305	7246	0.0392157	0.0420922	0.931662	9568;55584;5618;9170	GABBR2;CHRNA9;PRLR;LPAR2	0.628308	0.958824	Environmental Information Processing
path:hsa04917	Prolactin signaling pathway	1	102	70	7246	0.00980392	0.0096605	1.01485	5618	PRLR	0.631075	0.958824	Organismal Systems
path:hsa04921	Oxytocin signaling pathway	2	102	152	7246	0.0196078	0.0209771	0.934727	818;6262	CAMK2G;RYR2	0.635536	0.958824	Organismal Systems
path:hsa05214	Glioma	1	102	71	7246	0.00980392	0.00979851	1.00055	818	CAMK2G	0.636319	0.958824	Human Diseases
path:hsa01524	Platinum drug resistance	1	102	71	7246	0.00980392	0.00979851	1.00055	4259	MGST3	0.636319	0.958824	Human Diseases
path:hsa04115	p53 signaling pathway	1	102	72	7246	0.00980392	0.00993652	0.986656	55240	STEAP3	0.641489	0.958824	Cellular Processes
path:hsa04260	Cardiac muscle contraction	1	102	74	7246	0.00980392	0.0102125	0.959989	6262	RYR2	0.651612	0.958824	Organismal Systems
path:hsa04971	Gastric acid secretion	1	102	75	7246	0.00980392	0.0103505	0.94719	818	CAMK2G	0.656567	0.958824	Organismal Systems
path:hsa04218	Cellular senescence	2	102	158	7246	0.0196078	0.0218051	0.899231	90550;7416	MCU;VDAC1	0.656585	0.958824	Cellular Processes
path:hsa00983	Drug metabolism - other enzymes	1	102	77	7246	0.00980392	0.0106266	0.922587	4259	MGST3	0.666268	0.958824	Metabolism
path:hsa04630	Jak-STAT signaling pathway	2	102	162	7246	0.0196078	0.0223572	0.877027	3595;5618	IL12RB2;PRLR	0.670079	0.958824	Environmental Information Processing
path:hsa05225	Hepatocellular carcinoma	2	102	165	7246	0.0196078	0.0227712	0.861081	4259;1728	MGST3;NQO1	0.679919	0.958824	Human Diseases
path:hsa04621	NOD-like receptor signaling pathway	2	102	167	7246	0.0196078	0.0230472	0.850769	90550;7416	MCU;VDAC1	0.686347	0.958824	Organismal Systems
path:hsa05410	Hypertrophic cardiomyopathy (HCM)	1	102	85	7246	0.00980392	0.0117306	0.835755	6262	RYR2	0.702432	0.958824	Human Diseases
path:hsa00230	Purine metabolism	2	102	174	7246	0.0196078	0.0240132	0.816543	204;50808	AK2;AK3	0.708024	0.958824	Metabolism
path:hsa04540	Gap junction	1	102	88	7246	0.00980392	0.0121446	0.807264	2697	GJA1	0.714969	0.958824	Cellular Processes
path:hsa04727	GABAergic synapse	1	102	88	7246	0.00980392	0.0121446	0.807264	9568	GABBR2	0.714969	0.958824	Organismal Systems
path:hsa05414	Dilated cardiomyopathy (DCM)	1	102	89	7246	0.00980392	0.0122826	0.798193	6262	RYR2	0.719031	0.958824	Human Diseases
path:hsa04974	Protein digestion and absorption	1	102	90	7246	0.00980392	0.0124206	0.789325	8645	KCNK5	0.723035	0.958824	Organismal Systems
path:hsa04658	Th1 and Th2 cell differentiation	1	102	90	7246	0.00980392	0.0124206	0.789325	3595	IL12RB2	0.723035	0.958824	Organismal Systems
path:hsa05034	Alcoholism	2	102	180	7246	0.0196078	0.0248413	0.789325	4128;5569	MAOA;PKIA	0.725609	0.958824	Human Diseases
path:hsa05032	Morphine addiction	1	102	91	7246	0.00980392	0.0125587	0.780651	9568	GABBR2	0.726983	0.958824	Human Diseases
path:hsa04912	GnRH signaling pathway	1	102	93	7246	0.00980392	0.0128347	0.763863	818	CAMK2G	0.734712	0.958824	Organismal Systems
path:hsa04640	Hematopoietic cell lineage	1	102	94	7246	0.00980392	0.0129727	0.755736	928	CD9	0.738495	0.958824	Organismal Systems
path:hsa05146	Amoebiasis	1	102	95	7246	0.00980392	0.0131107	0.747781	5273	SERPINB10	0.742225	0.958824	Human Diseases
path:hsa04925	Aldosterone synthesis and secretion	1	102	96	7246	0.00980392	0.0132487	0.739992	818	CAMK2G	0.745902	0.958824	Organismal Systems
path:hsa00564	Glycerophospholipid metabolism	1	102	97	7246	0.00980392	0.0133867	0.732363	57678	GPAM	0.749526	0.958824	Metabolism
path:hsa04972	Pancreatic secretion	1	102	98	7246	0.00980392	0.0135247	0.72489	6262	RYR2	0.7531	0.958824	Organismal Systems
path:hsa05200	Pathways in cancer	6	102	523	7246	0.0588235	0.0721778	0.814981	3595;818;54583;1728;9170;4259	IL12RB2;CAMK2G;EGLN1;NQO1;LPAR2;MGST3	0.755143	0.958824	Human Diseases
path:hsa04914	Progesterone-mediated oocyte maturation	1	102	99	7246	0.00980392	0.0136627	0.717568	64506	CPEB1	0.756623	0.958824	Organismal Systems
path:hsa04750	Inflammatory mediator regulation of TRP channels	1	102	99	7246	0.00980392	0.0136627	0.717568	818	CAMK2G	0.756623	0.958824	Organismal Systems
path:hsa04916	Melanogenesis	1	102	101	7246	0.00980392	0.0139387	0.703359	818	CAMK2G	0.763521	0.959296	Organismal Systems
path:hsa04060	Cytokine-cytokine receptor interaction	3	102	292	7246	0.0294118	0.0402981	0.729855	3595;60401;5618	IL12RB2;EDA2R;PRLR	0.785667	0.96479	Environmental Information Processing
path:hsa04015	Rap1 signaling pathway	2	102	206	7246	0.0196078	0.0284295	0.689701	84552;9170	PARD6G;LPAR2	0.791857	0.96479	Environmental Information Processing
path:hsa04725	Cholinergic synapse	1	102	112	7246	0.00980392	0.0154568	0.634279	818	CAMK2G	0.798138	0.96479	Organismal Systems
path:hsa04724	Glutamatergic synapse	1	102	114	7246	0.00980392	0.0157328	0.623151	57030	SLC17A7	0.80387	0.96479	Organismal Systems
path:hsa04810	Regulation of actin cytoskeleton	2	102	213	7246	0.0196078	0.0293955	0.667035	26999;9170	CYFIP2;LPAR2	0.807132	0.96479	Cellular Processes
path:hsa04152	AMPK signaling pathway	1	102	120	7246	0.00980392	0.0165609	0.591993	5106	PCK2	0.820115	0.96479	Environmental Information Processing
path:hsa04142	Lysosome	1	102	123	7246	0.00980392	0.0169749	0.577555	6272	SORT1	0.82773	0.96479	Cellular Processes
path:hsa04140	Autophagy - animal	1	102	128	7246	0.00980392	0.0176649	0.554994	10533	ATG7	0.83972	0.96479	Cellular Processes
path:hsa04068	FoxO signaling pathway	1	102	132	7246	0.00980392	0.0182169	0.538176	5106	PCK2	0.848713	0.96479	Environmental Information Processing
path:hsa04915	Estrogen signaling pathway	1	102	136	7246	0.00980392	0.018769	0.522347	9568	GABBR2	0.857207	0.96479	Organismal Systems
path:hsa04120	Ubiquitin mediated proteolysis	1	102	136	7246	0.00980392	0.018769	0.522347	22954	TRIM32	0.857207	0.96479	Genetic Information Processing
path:hsa04371	Apelin signaling pathway	1	102	137	7246	0.00980392	0.018907	0.518534	6262	RYR2	0.859255	0.96479	Environmental Information Processing
path:hsa04910	Insulin signaling pathway	1	102	137	7246	0.00980392	0.018907	0.518534	5106	PCK2	0.859255	0.96479	Organismal Systems
path:hsa04072	Phospholipase D signaling pathway	1	102	145	7246	0.00980392	0.020011	0.489926	9170	LPAR2	0.874629	0.96479	Environmental Information Processing
path:hsa04151	PI3K-Akt signaling pathway	3	102	353	7246	0.0294118	0.0487165	0.603733	5618;5106;9170	PRLR;PCK2;LPAR2	0.880757	0.96479	Environmental Information Processing
path:hsa04390	Hippo signaling pathway	1	102	154	7246	0.00980392	0.0212531	0.461294	84552	PARD6G	0.889944	0.96479	Environmental Information Processing
path:hsa04934	Cushing syndrome	1	102	154	7246	0.00980392	0.0212531	0.461294	818	CAMK2G	0.889944	0.96479	Human Diseases
path:hsa04022	cGMP-PKG signaling pathway	1	102	163	7246	0.00980392	0.0224952	0.435823	7416	VDAC1	0.903405	0.96479	Environmental Information Processing
path:hsa04141	Protein processing in endoplasmic reticulum	1	102	164	7246	0.00980392	0.0226332	0.433166	51128	SAR1B	0.904796	0.96479	Genetic Information Processing
path:hsa03013	RNA transport	1	102	166	7246	0.00980392	0.0229092	0.427947	26999	CYFIP2	0.907518	0.96479	Genetic Information Processing
path:hsa05164	Influenza A	1	102	169	7246	0.00980392	0.0233232	0.42035	7416	VDAC1	0.911459	0.96479	Human Diseases
path:hsa04530	Tight junction	1	102	170	7246	0.00980392	0.0234612	0.417878	84552	PARD6G	0.912735	0.96479	Cellular Processes
path:hsa05152	Tuberculosis	1	102	175	7246	0.00980392	0.0241513	0.405938	818	CAMK2G	0.918847	0.96479	Human Diseases
path:hsa05168	Herpes simplex infection	1	102	183	7246	0.00980392	0.0252553	0.388192	25833	POU2F3	0.927757	0.967236	Human Diseases
path:hsa05205	Proteoglycans in cancer	1	102	198	7246	0.00980392	0.0273254	0.358784	818	CAMK2G	0.941932	0.969995	Human Diseases
path:hsa05203	Viral carcinogenesis	1	102	200	7246	0.00980392	0.0276014	0.355196	28973	MRPS18B	0.943601	0.969995	Human Diseases
path:hsa04144	Endocytosis	1	102	244	7246	0.00980392	0.0336738	0.291144	84552	PARD6G	0.970368	0.987471	Cellular Processes
path:hsa05166	Human T-cell leukemia virus 1 infection	1	102	253	7246	0.00980392	0.0349158	0.280787	7416	VDAC1	0.974036	0.987471	Human Diseases
path:hsa05165	Human papillomavirus infection	1	102	339	7246	0.00980392	0.0467844	0.209555	84552	PARD6G	0.992719	0.998445	Human Diseases
path:hsa04740	Olfactory transduction	1	102	442	7246	0.00980392	0.0609992	0.160722	818	CAMK2G	0.998445	0.998445	Organismal Systems

## Sheet: Reticulum
Term_ID	Term_description	ListHit	ListTotal	PopHit	PopTotal	GeneRatio	BgRatio	Enrichment_score	GeneIds	GeneSymbols	p-value	FDR_bh	Classification_level1
path:bta00280	Valine, leucine and isoleucine degradation	4	52	51	8158	0.0769231	0.00625153	12.3047	ECHS1;ACADS;HMGCL;MCEE	ECHS1;ACADS;HMGCL;MCEE	0.000294007	0.0296947	Metabolism
path:bta00650	Butanoate metabolism	3	52	28	8158	0.0576923	0.00343221	16.8091	ECHS1;ACADS;HMGCL	ECHS1;ACADS;HMGCL	0.000715121	0.0361136	Metabolism
path:bta00920	Sulfur metabolism	2	52	9	8158	0.0384615	0.00110321	34.8632	TST;SUOX	TST;SUOX	0.00139421	0.0469383	Metabolism
path:bta04146	Peroxisome	4	52	84	8158	0.0769231	0.0102966	7.4707	HMGCL;ECH1;MPV17L;DDO	HMGCL;ECH1;MPV17L;DDO	0.0019446	0.049101	Cellular Processes
path:bta04060	Cytokine-cytokine receptor interaction	7	52	323	8158	0.134615	0.039593	3.39998	IL17RB;IL7;PRLR;CCR8;EDA2R;IL1R2;EPOR	IL17RB;IL7;PRLR;CCR8;EDA2R;IL1R2;EPOR	0.00412661	0.0833576	Environmental Information Processing
path:bta04640	Hematopoietic cell lineage	4	52	110	8158	0.0769231	0.0134837	5.7049	IL1R2;IL7;CR2;EPOR	IL1R2;IL7;CR2;EPOR	0.00515269	0.086737	Organismal Systems
path:bta00630	Glyoxylate and dicarboxylate metabolism	2	52	30	8158	0.0384615	0.00367737	10.459	GLYCTK;MCEE	GLYCTK;MCEE	0.0154681	0.207909	Metabolism
path:bta00640	Propanoate metabolism	2	52	31	8158	0.0384615	0.00379995	10.1216	ECHS1;MCEE	ECHS1;MCEE	0.016468	0.207909	Metabolism
path:bta00071	Fatty acid degradation	2	52	42	8158	0.0384615	0.00514832	7.4707	ECHS1;ACADS	ECHS1;ACADS	0.0291686	0.307733	Metabolism
path:bta04978	Mineral absorption	2	52	43	8158	0.0384615	0.0052709	7.29696	SLC26A3;SLC39A4	SLC26A3;SLC39A4	0.0304686	0.307733	Organismal Systems
path:bta00270	Cysteine and methionine metabolism	2	52	47	8158	0.0384615	0.00576122	6.67594	TST;AHCYL2	TST;AHCYL2	0.0358928	0.329561	Metabolism
path:bta04122	Sulfur relay system	1	52	10	8158	0.0192308	0.00122579	15.6885	TST	TST	0.0619767	0.521638	Genetic Information Processing
path:bta00072	Synthesis and degradation of ketone bodies	1	52	11	8158	0.0192308	0.00134837	14.2622	HMGCL	HMGCL	0.0679631	0.528021	Metabolism
path:bta00983	Drug metabolism - other enzymes	2	52	74	8158	0.0384615	0.00907085	4.24012	CES2;UGT2A1	CES2;UGT2A1	0.0805212	0.580903	Metabolism
path:bta04742	Taste transduction	2	52	79	8158	0.0384615	0.00968375	3.97176	KCNK5;GABBR2	KCNK5;GABBR2	0.0900486	0.606327	Organismal Systems
path:bta00910	Nitrogen metabolism	1	52	17	8158	0.0192308	0.00208384	9.22851	CA12	CA12	0.103103	0.629402	Metabolism
path:bta04610	Complement and coagulation cascades	2	52	87	8158	0.0384615	0.0106644	3.60654	CR2;SERPINF2	CR2;SERPINF2	0.105939	0.629402	Organismal Systems
path:bta04972	Pancreatic secretion	2	52	96	8158	0.0384615	0.0117676	3.26843	SLC26A3;CLCA1	SLC26A3;CLCA1	0.124642	0.663281	Organismal Systems
path:bta04630	Jak-STAT signaling pathway	3	52	202	8158	0.0576923	0.024761	2.32997	IL7;PRLR;EPOR	IL7;PRLR;EPOR	0.137422	0.663281	Environmental Information Processing
path:bta00053	Ascorbate and aldarate metabolism	1	52	25	8158	0.0192308	0.00306448	6.27538	UGT2A1	UGT2A1	0.147941	0.663281	Metabolism
path:bta00030	Pentose phosphate pathway	1	52	28	8158	0.0192308	0.00343221	5.60302	GLYCTK	GLYCTK	0.164182	0.663281	Metabolism
path:bta04966	Collecting duct acid secretion	1	52	28	8158	0.0192308	0.00343221	5.60302	SLC12A7	SLC12A7	0.164182	0.663281	Organismal Systems
path:bta00062	Fatty acid elongation	1	52	31	8158	0.0192308	0.00379995	5.06079	ECHS1	ECHS1	0.180119	0.663281	Metabolism
path:bta04710	Circadian rhythm	1	52	31	8158	0.0192308	0.00379995	5.06079	BHLHE41	BHLHE41	0.180119	0.663281	Organismal Systems
path:bta00040	Pentose and glucuronate interconversions	1	52	31	8158	0.0192308	0.00379995	5.06079	UGT2A1	UGT2A1	0.180119	0.663281	Metabolism
path:bta00410	beta-Alanine metabolism	1	52	34	8158	0.0192308	0.00416769	4.61425	ECHS1	ECHS1	0.195759	0.663281	Metabolism
path:bta00250	Alanine, aspartate and glutamate metabolism	1	52	36	8158	0.0192308	0.00441285	4.35791	DDO	DDO	0.206022	0.663281	Metabolism
path:bta04915	Estrogen signaling pathway	2	52	137	8158	0.0384615	0.0167933	2.29029	HSPA2;GABBR2	HSPA2;GABBR2	0.217173	0.663281	Organismal Systems
path:bta00620	Pyruvate metabolism	1	52	39	8158	0.0192308	0.00478058	4.02268	LDHD	LDHD	0.221176	0.663281	Metabolism
path:bta00860	Porphyrin and chlorophyll metabolism	1	52	40	8158	0.0192308	0.00490316	3.92212	UGT2A1	UGT2A1	0.226164	0.663281	Metabolism
path:bta00260	Glycine, serine and threonine metabolism	1	52	43	8158	0.0192308	0.0052709	3.64848	GLYCTK	GLYCTK	0.240942	0.663281	Metabolism
path:bta00380	Tryptophan metabolism	1	52	45	8158	0.0192308	0.00551606	3.48632	ECHS1	ECHS1	0.250639	0.663281	Metabolism
path:bta04930	Type II diabetes mellitus	1	52	46	8158	0.0192308	0.00563864	3.41054	ADIPOQ	ADIPOQ	0.255442	0.663281	Human Diseases
path:bta04932	Non-alcoholic fatty liver disease (NAFLD)	2	52	154	8158	0.0384615	0.0188772	2.03746	ADIPOQ;MLXIPL	ADIPOQ;MLXIPL	0.257356	0.663281	Human Diseases
path:bta04310	Wnt signaling pathway	2	52	159	8158	0.0384615	0.0194901	1.97339	SFRP1;SFRP4	SFRP1;SFRP4	0.26923	0.663281	Environmental Information Processing
path:bta04962	Vasopressin-regulated water reabsorption	1	52	49	8158	0.0192308	0.00600637	3.20173	DYNC1I1	DYNC1I1	0.269671	0.663281	Organismal Systems
path:bta05134	Legionellosis	1	52	56	8158	0.0192308	0.00686443	2.80151	HSPA2	HSPA2	0.301842	0.663281	Human Diseases
path:bta04530	Tight junction	2	52	178	8158	0.0384615	0.0218191	1.76275	MYH7B;MYL6B	MYH7B;MYL6B	0.314279	0.663281	Cellular Processes
path:bta02010	ABC transporters	1	52	60	8158	0.0192308	0.00735474	2.61474	ABCB4	ABCB4	0.319597	0.663281	Environmental Information Processing
path:bta05230	Central carbon metabolism in cancer	1	52	61	8158	0.0192308	0.00747732	2.57188	SIRT6	SIRT6	0.323966	0.663281	Human Diseases
path:bta00982	Drug metabolism - cytochrome P450	1	52	61	8158	0.0192308	0.00747732	2.57188	UGT2A1	UGT2A1	0.323966	0.663281	Metabolism
path:bta04213	Longevity regulating pathway - multiple species	1	52	62	8158	0.0192308	0.0075999	2.5304	HSPA2	HSPA2	0.328307	0.663281	Organismal Systems
path:bta00830	Retinol metabolism	1	52	63	8158	0.0192308	0.00772248	2.49023	UGT2A1	UGT2A1	0.332622	0.663281	Metabolism
path:bta05202	Transcriptional misregulation in cancer	2	52	186	8158	0.0384615	0.0227997	1.68693	IL1R2;BCL2A1	IL1R2;BCL2A1	0.333113	0.663281	Human Diseases
path:bta00980	Metabolism of xenobiotics by cytochrome P450	1	52	64	8158	0.0192308	0.00784506	2.45132	UGT2A1	UGT2A1	0.336909	0.663281	Metabolism
path:bta00310	Lysine degradation	1	52	64	8158	0.0192308	0.00784506	2.45132	ECHS1	ECHS1	0.336909	0.663281	Metabolism
path:bta05221	Acute myeloid leukemia	1	52	66	8158	0.0192308	0.00809022	2.37704	BCL2A1	BCL2A1	0.345402	0.663281	Human Diseases
path:bta00561	Glycerolipid metabolism	1	52	66	8158	0.0192308	0.00809022	2.37704	GLYCTK	GLYCTK	0.345402	0.663281	Metabolism
path:bta00140	Steroid hormone biosynthesis	1	52	67	8158	0.0192308	0.0082128	2.34156	UGT2A1	UGT2A1	0.349608	0.663281	Metabolism
path:bta04080	Neuroactive ligand-receptor interaction	3	52	330	8158	0.0576923	0.0404511	1.42622	PRLR;GABBR2;CHRNA9	PRLR;GABBR2;CHRNA9	0.351903	0.663281	Environmental Information Processing
path:bta04924	Renin secretion	1	52	68	8158	0.0192308	0.00833538	2.30713	CLCA1	CLCA1	0.353788	0.663281	Organismal Systems
path:bta04920	Adipocytokine signaling pathway	1	52	72	8158	0.0192308	0.00882569	2.17895	ADIPOQ	ADIPOQ	0.370246	0.663281	Organismal Systems
path:bta05204	Chemical carcinogenesis	1	52	74	8158	0.0192308	0.00907085	2.12006	UGT2A1	UGT2A1	0.378321	0.663281	Human Diseases
path:bta04662	B cell receptor signaling pathway	1	52	74	8158	0.0192308	0.00907085	2.12006	CR2	CR2	0.378321	0.663281	Organismal Systems
path:bta04115	p53 signaling pathway	1	52	77	8158	0.0192308	0.00943859	2.03746	AIFM2	AIFM2	0.390242	0.663281	Cellular Processes
path:bta03320	PPAR signaling pathway	1	52	77	8158	0.0192308	0.00943859	2.03746	ADIPOQ	ADIPOQ	0.390242	0.663281	Organismal Systems
path:bta04721	Synaptic vesicle cycle	1	52	78	8158	0.0192308	0.00956117	2.01134	SLC6A4	SLC6A4	0.394166	0.663281	Organismal Systems
path:bta04612	Antigen processing and presentation	1	52	81	8158	0.0192308	0.0099289	1.93685	HSPA2	HSPA2	0.405789	0.663281	Organismal Systems
path:bta04917	Prolactin signaling pathway	1	52	83	8158	0.0192308	0.0101741	1.89018	PRLR	PRLR	0.413416	0.663281	Organismal Systems
path:bta04976	Bile secretion	1	52	83	8158	0.0192308	0.0101741	1.89018	ABCB4	ABCB4	0.413416	0.663281	Organismal Systems
path:bta05132	Salmonella infection	1	52	85	8158	0.0192308	0.0104192	1.8457	DYNC1I1	DYNC1I1	0.420947	0.663281	Human Diseases
path:bta04151	PI3K-Akt signaling pathway	3	52	373	8158	0.0576923	0.045722	1.26181	IL7;PRLR;EPOR	IL7;PRLR;EPOR	0.426999	0.663281	Environmental Information Processing
path:bta04914	Progesterone-mediated oocyte maturation	1	52	88	8158	0.0192308	0.010787	1.78278	CPEB1	CPEB1	0.432065	0.663281	Organismal Systems
path:bta04657	IL-17 signaling pathway	1	52	90	8158	0.0192308	0.0110321	1.74316	IL17RB	IL17RB	0.439361	0.663281	Organismal Systems
path:bta04727	GABAergic synapse	1	52	90	8158	0.0192308	0.0110321	1.74316	GABBR2	GABBR2	0.439361	0.663281	Organismal Systems
path:bta04211	Longevity regulating pathway	1	52	90	8158	0.0192308	0.0110321	1.74316	ADIPOQ	ADIPOQ	0.439361	0.663281	Organismal Systems
path:bta05032	Morphine addiction	1	52	92	8158	0.0192308	0.0112773	1.70527	GABBR2	GABBR2	0.446565	0.663281	Human Diseases
path:bta04970	Salivary secretion	1	52	92	8158	0.0192308	0.0112773	1.70527	AQP5	AQP5	0.446565	0.663281	Organismal Systems
path:bta05215	Prostate cancer	1	52	95	8158	0.0192308	0.011645	1.65142	IL1R2	IL1R2	0.457202	0.664727	Human Diseases
path:bta04064	NF-kappa B signaling pathway	1	52	96	8158	0.0192308	0.0117676	1.63421	BCL2A1	BCL2A1	0.460702	0.664727	Environmental Information Processing
path:bta05146	Amoebiasis	1	52	101	8158	0.0192308	0.0123805	1.55331	IL1R2	IL1R2	0.477876	0.675081	Human Diseases
path:bta00564	Glycerophospholipid metabolism	1	52	102	8158	0.0192308	0.0125031	1.53808	ETNPPL	ETNPPL	0.481246	0.675081	Metabolism
path:bta04931	Insulin resistance	1	52	109	8158	0.0192308	0.0133611	1.43931	MLXIPL	MLXIPL	0.504244	0.681416	Human Diseases
path:bta04670	Leukocyte transendothelial migration	1	52	113	8158	0.0192308	0.0138514	1.38836	RHOH	RHOH	0.516934	0.681416	Organismal Systems
path:bta05145	Toxoplasmosis	1	52	113	8158	0.0192308	0.0138514	1.38836	HSPA2	HSPA2	0.516934	0.681416	Human Diseases
path:bta04974	Protein digestion and absorption	1	52	113	8158	0.0192308	0.0138514	1.38836	KCNK5	KCNK5	0.516934	0.681416	Organismal Systems
path:bta04114	Oocyte meiosis	1	52	116	8158	0.0192308	0.0142192	1.35245	CPEB1	CPEB1	0.526242	0.681416	Cellular Processes
path:bta04726	Serotonergic synapse	1	52	116	8158	0.0192308	0.0142192	1.35245	SLC6A4	SLC6A4	0.526242	0.681416	Organismal Systems
path:bta04152	AMPK signaling pathway	1	52	123	8158	0.0192308	0.0150772	1.27548	ADIPOQ	ADIPOQ	0.547282	0.699689	Environmental Information Processing
path:bta04270	Vascular smooth muscle contraction	1	52	129	8158	0.0192308	0.0158127	1.21616	MYL6B	MYL6B	0.564584	0.71255	Organismal Systems
path:bta03040	Spliceosome	1	52	133	8158	0.0192308	0.016303	1.17958	HSPA2	HSPA2	0.575757	0.71255	Genetic Information Processing
path:bta00230	Purine metabolism	1	52	134	8158	0.0192308	0.0164256	1.17078	PDE6C	PDE6C	0.578506	0.71255	Metabolism
path:bta05012	Parkinson disease	1	52	137	8158	0.0192308	0.0167933	1.14514	GPR37	GPR37	0.586648	0.712796	Human Diseases
path:bta04210	Apoptosis	1	52	142	8158	0.0192308	0.0174062	1.10482	BCL2A1	BCL2A1	0.599878	0.712796	Cellular Processes
path:bta05418	Fluid shear stress and atherosclerosis	1	52	142	8158	0.0192308	0.0174062	1.10482	IL1R2	IL1R2	0.599878	0.712796	Human Diseases
path:bta05162	Measles	1	52	146	8158	0.0192308	0.0178965	1.07455	HSPA2	HSPA2	0.610162	0.716585	Human Diseases
path:bta04921	Oxytocin signaling pathway	1	52	150	8158	0.0192308	0.0183869	1.0459	MYL6B	MYL6B	0.620186	0.719986	Organismal Systems
path:bta04141	Protein processing in endoplasmic reticulum	1	52	164	8158	0.0192308	0.020103	0.956614	HSPA2	HSPA2	0.65332	0.749037	Genetic Information Processing
path:bta04145	Phagosome	1	52	167	8158	0.0192308	0.0204707	0.939429	DYNC1I1	DYNC1I1	0.660042	0.749037	Cellular Processes
path:bta04360	Axon guidance	1	52	178	8158	0.0192308	0.0218191	0.881374	UNC5A	UNC5A	0.683614	0.761025	Organismal Systems
path:bta05164	Influenza A	1	52	179	8158	0.0192308	0.0219417	0.87645	HSPA2	HSPA2	0.685676	0.761025	Human Diseases
path:bta04062	Chemokine signaling pathway	1	52	189	8158	0.0192308	0.0231674	0.830077	CCR8	CCR8	0.705581	0.774606	Organismal Systems
path:bta05167	Kaposi sarcoma-associated herpesvirus infection	1	52	203	8158	0.0192308	0.0248835	0.772831	CCR8	CCR8	0.731386	0.794301	Human Diseases
path:bta04024	cAMP signaling pathway	1	52	211	8158	0.0192308	0.0258642	0.743529	GABBR2	GABBR2	0.745122	0.80061	Environmental Information Processing
path:bta05169	Epstein-Barr virus infection	1	52	224	8158	0.0192308	0.0274577	0.700378	CR2	CR2	0.765987	0.804793	Human Diseases
path:bta04714	Thermogenesis	1	52	224	8158	0.0192308	0.0274577	0.700378	SIRT6	SIRT6	0.765987	0.804793	Organismal Systems
path:bta05166	Human T-cell leukemia virus 1 infection	1	52	230	8158	0.0192308	0.0281932	0.682107	IL1R2	IL1R2	0.775043	0.804793	Human Diseases
path:bta05203	Viral carcinogenesis	1	52	234	8158	0.0192308	0.0286835	0.670447	CCR8	CCR8	0.780888	0.804793	Human Diseases
path:bta04144	Endocytosis	1	52	243	8158	0.0192308	0.0297867	0.645616	HSPA2	HSPA2	0.793501	0.809531	Cellular Processes
path:bta04010	MAPK signaling pathway	1	52	292	8158	0.0192308	0.0357931	0.537276	HSPA2	HSPA2	0.850645	0.859151	Environmental Information Processing
path:bta05200	Pathways in cancer	2	52	531	8158	0.0384615	0.0650895	0.590903	IL7;EPOR	IL7;EPOR	0.861305	0.861305	Human Diseases

## Sheet: Omasum
Term_ID	Term_description	ListHit	ListTotal	PopHit	PopTotal	GeneRatio	BgRatio	Enrichment_score	GeneIds	GeneSymbols	p-value	FDR_bh	Classification_level1
path:bta04510	Focal adhesion	6	47	198	8158	0.12766	0.0242707	5.25983	ITGA1;FN1;PRKCB;FLNA;THBS4;MYL9	ITGA1;FN1;PRKCB;FLNA;THBS4;MYL9	0.000887949	0.112769	Cellular Processes
path:bta00230	Purine metabolism	4	47	134	8158	0.0851064	0.0164256	5.18133	AK4;GDA;NT5C1A;PDE6C	AK4;GDA;NT5C1A;PDE6C	0.00718974	0.345033	Metabolism
path:bta04512	ECM-receptor interaction	3	47	83	8158	0.0638298	0.0101741	6.27378	ITGA1;FN1;THBS4	ITGA1;FN1;THBS4	0.0119355	0.345033	Environmental Information Processing
path:bta04310	Wnt signaling pathway	4	47	159	8158	0.0851064	0.0194901	4.36665	SFRP4;DKK2;SFRP1;PRKCB	SFRP4;DKK2;SFRP1;PRKCB	0.0129326	0.345033	Environmental Information Processing
path:bta04710	Circadian rhythm	2	47	31	8158	0.0425532	0.00379995	11.1984	BHLHE41;NR1D1	BHLHE41;NR1D1	0.013584	0.345033	Organismal Systems
path:bta04931	Insulin resistance	3	47	109	8158	0.0638298	0.0133611	4.77728	SLC27A2;MLXIPL;PRKCB	SLC27A2;MLXIPL;PRKCB	0.0245877	0.404395	Human Diseases
path:bta04640	Hematopoietic cell lineage	3	47	110	8158	0.0638298	0.0134837	4.73385	EPOR;ITGA1;CR2	EPOR;ITGA1;CR2	0.0251768	0.404395	Organismal Systems
path:bta00270	Cysteine and methionine metabolism	2	47	47	8158	0.0425532	0.00576122	7.38615	AHCYL2;TST	AHCYL2;TST	0.0297953	0.404395	Metabolism
path:bta04270	Vascular smooth muscle contraction	3	47	129	8158	0.0638298	0.0158127	4.03662	EDN2;MYL9;PRKCB	EDN2;MYL9;PRKCB	0.0378144	0.404395	Organismal Systems
path:bta00920	Sulfur metabolism	1	47	9	8158	0.0212766	0.00110321	19.2861	TST	TST	0.0506963	0.404395	Metabolism
path:bta04921	Oxytocin signaling pathway	3	47	150	8158	0.0638298	0.0183869	3.47149	MYL9;CACNG7;PRKCB	MYL9;CACNG7;PRKCB	0.0549047	0.404395	Organismal Systems
path:bta00130	Ubiquinone and other terpenoid-quinone biosynthesis	1	47	10	8158	0.0212766	0.00122579	17.3574	NQO1	NQO1	0.0561714	0.404395	Metabolism
path:bta04122	Sulfur relay system	1	47	10	8158	0.0212766	0.00122579	17.3574	TST	TST	0.0561714	0.404395	Genetic Information Processing
path:bta05412	Arrhythmogenic right ventricular cardiomyopathy (ARVC)	2	47	68	8158	0.0425532	0.00833538	5.10513	ITGA1;CACNG7	ITGA1;CACNG7	0.0582074	0.404395	Human Diseases
path:bta04662	B cell receptor signaling pathway	2	47	74	8158	0.0425532	0.00907085	4.6912	CR2;PRKCB	CR2;PRKCB	0.0675464	0.404395	Organismal Systems
path:bta04918	Thyroid hormone synthesis	2	47	74	8158	0.0425532	0.00907085	4.6912	TPO;PRKCB	TPO;PRKCB	0.0675464	0.404395	Organismal Systems
path:bta03320	PPAR signaling pathway	2	47	77	8158	0.0425532	0.00943859	4.50843	SLC27A2;ACOX2	SLC27A2;ACOX2	0.0723914	0.404395	Organismal Systems
path:bta04742	Taste transduction	2	47	79	8158	0.0425532	0.00968375	4.39429	P2RX3;GABRA5	P2RX3;GABRA5	0.0756829	0.404395	Organismal Systems
path:bta05410	Hypertrophic cardiomyopathy (HCM)	2	47	82	8158	0.0425532	0.0100515	4.23352	ITGA1;CACNG7	ITGA1;CACNG7	0.0807086	0.404395	Human Diseases
path:bta04012	ErbB signaling pathway	2	47	84	8158	0.0425532	0.0102966	4.13273	BTC;PRKCB	BTC;PRKCB	0.084116	0.404395	Environmental Information Processing
path:bta04146	Peroxisome	2	47	84	8158	0.0425532	0.0102966	4.13273	SLC27A2;ACOX2	SLC27A2;ACOX2	0.084116	0.404395	Cellular Processes
path:bta04350	TGF-beta signaling pathway	2	47	86	8158	0.0425532	0.0105418	4.03662	NOG;FMOD	NOG;FMOD	0.0875671	0.404395	Environmental Information Processing
path:bta00604	Glycosphingolipid biosynthesis - ganglio series	1	47	16	8158	0.0212766	0.00196127	10.8484	ST8SIA5	ST8SIA5	0.0883794	0.404395	Metabolism
path:bta05414	Dilated cardiomyopathy (DCM)	2	47	88	8158	0.0425532	0.010787	3.94487	ITGA1;CACNG7	ITGA1;CACNG7	0.0910607	0.404395	Human Diseases
path:bta00120	Primary bile acid biosynthesis	1	47	17	8158	0.0212766	0.00208384	10.2103	ACOX2	ACOX2	0.0936417	0.404395	Metabolism
path:bta00910	Nitrogen metabolism	1	47	17	8158	0.0212766	0.00208384	10.2103	CA4	CA4	0.0936417	0.404395	Metabolism
path:bta04727	GABAergic synapse	2	47	90	8158	0.0425532	0.0110321	3.85721	GABRA5;PRKCB	GABRA5;PRKCB	0.0945952	0.404395	Organismal Systems
path:bta05032	Morphine addiction	2	47	92	8158	0.0425532	0.0112773	3.77336	GABRA5;PRKCB	GABRA5;PRKCB	0.0981695	0.404395	Human Diseases
path:bta04970	Salivary secretion	2	47	92	8158	0.0425532	0.0112773	3.77336	SLC12A2;PRKCB	SLC12A2;PRKCB	0.0981695	0.404395	Organismal Systems
path:bta00730	Thiamine metabolism	1	47	18	8158	0.0212766	0.00220642	9.64303	AK4	AK4	0.0988744	0.404395	Metabolism
path:bta05205	Proteoglycans in cancer	3	47	195	8158	0.0638298	0.0239029	2.67038	FN1;FLNA;PRKCB	FN1;FLNA;PRKCB	0.101615	0.404395	Human Diseases
path:bta04064	NF-kappa B signaling pathway	2	47	96	8158	0.0425532	0.0117676	3.61613	LY96;PRKCB	LY96;PRKCB	0.105432	0.404395	Environmental Information Processing
path:bta04972	Pancreatic secretion	2	47	96	8158	0.0425532	0.0117676	3.61613	SLC12A2;PRKCB	SLC12A2;PRKCB	0.105432	0.404395	Organismal Systems
path:bta05146	Amoebiasis	2	47	101	8158	0.0425532	0.0123805	3.43712	FN1;PRKCB	FN1;PRKCB	0.114709	0.404395	Human Diseases
path:bta04933	AGE-RAGE signaling pathway in diabetic complications	2	47	102	8158	0.0425532	0.0125031	3.40342	FN1;PRKCB	FN1;PRKCB	0.11659	0.404395	Human Diseases
path:bta04964	Proximal tubule bicarbonate reclamation	1	47	22	8158	0.0212766	0.00269674	7.88975	CA4	CA4	0.119511	0.404395	Organismal Systems
path:bta04810	Regulation of actin cytoskeleton	3	47	210	8158	0.0638298	0.0257416	2.47964	MYL9;ITGA1;FN1	MYL9;ITGA1;FN1	0.119863	0.404395	Cellular Processes
path:bta04080	Neuroactive ligand-receptor interaction	4	47	330	8158	0.0851064	0.0404511	2.10393	EDN2;P2RX3;MLNR;GABRA5	EDN2;P2RX3;MLNR;GABRA5	0.121	0.404395	Environmental Information Processing
path:bta04670	Leukocyte transendothelial migration	2	47	113	8158	0.0425532	0.0138514	3.07211	MYL9;PRKCB	MYL9;PRKCB	0.137774	0.437431	Organismal Systems
path:bta04919	Thyroid hormone signaling pathway	2	47	113	8158	0.0425532	0.0138514	3.07211	GATA4;PRKCB	GATA4;PRKCB	0.137774	0.437431	Organismal Systems
path:bta04726	Serotonergic synapse	2	47	116	8158	0.0425532	0.0142192	2.99266	SLC6A4;PRKCB	SLC6A4;PRKCB	0.143694	0.441845	Organismal Systems
path:bta00030	Pentose phosphate pathway	1	47	28	8158	0.0212766	0.00343221	6.19909	FBP1	FBP1	0.149601	0.441845	Metabolism
path:bta04966	Collecting duct acid secretion	1	47	28	8158	0.0212766	0.00343221	6.19909	SLC12A7	SLC12A7	0.149601	0.441845	Organismal Systems
path:bta04151	PI3K-Akt signaling pathway	4	47	373	8158	0.0851064	0.045722	1.86139	EPOR;ITGA1;FN1;THBS4	EPOR;ITGA1;FN1;THBS4	0.166272	0.477236	Environmental Information Processing
path:bta00760	Nicotinate and nicotinamide metabolism	1	47	32	8158	0.0212766	0.00392253	5.4242	NT5C1A	NT5C1A	0.1691	0.477236	Metabolism
path:bta00051	Fructose and mannose metabolism	1	47	34	8158	0.0212766	0.00416769	5.10513	FBP1	FBP1	0.178684	0.493323	Metabolism
path:bta04960	Aldosterone-regulated sodium reabsorption	1	47	37	8158	0.0212766	0.00453543	4.6912	PRKCB	PRKCB	0.192858	0.505052	Organismal Systems
path:bta00790	Folate biosynthesis	1	47	37	8158	0.0212766	0.00453543	4.6912	MOCOS	MOCOS	0.192858	0.505052	Metabolism
path:bta00350	Tyrosine metabolism	1	47	39	8158	0.0212766	0.00478058	4.45063	TPO	TPO	0.202174	0.505052	Metabolism
path:bta04723	Retrograde endocannabinoid signaling	2	47	145	8158	0.0425532	0.017774	2.39413	GABRA5;PRKCB	GABRA5;PRKCB	0.203234	0.505052	Organismal Systems
path:bta05033	Nicotine addiction	1	47	40	8158	0.0212766	0.00490316	4.33936	GABRA5	GABRA5	0.206793	0.505052	Human Diseases
path:bta04973	Carbohydrate digestion and absorption	1	47	40	8158	0.0212766	0.00490316	4.33936	PRKCB	PRKCB	0.206793	0.505052	Organismal Systems
path:bta04961	Endocrine and other factor-regulated calcium reabsorption	1	47	42	8158	0.0212766	0.00514832	4.13273	PRKCB	PRKCB	0.215952	0.507886	Organismal Systems
path:bta05143	African trypanosomiasis	1	47	42	8158	0.0212766	0.00514832	4.13273	PRKCB	PRKCB	0.215952	0.507886	Human Diseases
path:bta04010	MAPK signaling pathway	3	47	292	8158	0.0638298	0.0357931	1.7833	CACNG7;FLNA;PRKCB	CACNG7;FLNA;PRKCB	0.236259	0.541	Environmental Information Processing
path:bta04022	cGMP-PKG signaling pathway	2	47	163	8158	0.0425532	0.0199804	2.12975	GATA4;MYL9	GATA4;MYL9	0.241516	0.541	Environmental Information Processing
path:bta00330	Arginine and proline metabolism	1	47	48	8158	0.0212766	0.0058838	3.61613	CKB	CKB	0.242811	0.541	Metabolism
path:bta05225	Hepatocellular carcinoma	2	47	171	8158	0.0425532	0.020961	2.03011	NQO1;PRKCB	NQO1;PRKCB	0.258673	0.566405	Human Diseases
path:bta04530	Tight junction	2	47	178	8158	0.0425532	0.0218191	1.95027	GATA4;MYL9	GATA4;MYL9	0.273712	0.567468	Cellular Processes
path:bta04360	Axon guidance	2	47	178	8158	0.0425532	0.0218191	1.95027	EPHA5;MYL9	EPHA5;MYL9	0.273712	0.567468	Organismal Systems
path:bta00240	Pyrimidine metabolism	1	47	56	8158	0.0212766	0.00686443	3.09954	NT5C1A	NT5C1A	0.277227	0.567468	Metabolism
path:bta04370	VEGF signaling pathway	1	47	58	8158	0.0212766	0.00710959	2.99266	PRKCB	PRKCB	0.285589	0.567468	Environmental Information Processing
path:bta05144	Malaria	1	47	58	8158	0.0212766	0.00710959	2.99266	THBS4	THBS4	0.285589	0.567468	Human Diseases
path:bta02010	ABC transporters	1	47	60	8158	0.0212766	0.00735474	2.89291	ABCB4	ABCB4	0.293856	0.567468	Environmental Information Processing
path:bta04730	Long-term depression	1	47	60	8158	0.0212766	0.00735474	2.89291	PRKCB	PRKCB	0.293856	0.567468	Organismal Systems
path:bta00830	Retinol metabolism	1	47	63	8158	0.0212766	0.00772248	2.75515	RETSAT	RETSAT	0.306081	0.567468	Metabolism
path:bta04020	Calcium signaling pathway	2	47	195	8158	0.0425532	0.0239029	1.78025	P2RX3;PRKCB	P2RX3;PRKCB	0.310181	0.567468	Environmental Information Processing
path:bta00010	Glycolysis / Gluconeogenesis	1	47	65	8158	0.0212766	0.00796764	2.67038	FBP1	FBP1	0.314116	0.567468	Metabolism
path:bta05165	Human papillomavirus infection	3	47	342	8158	0.0638298	0.041922	1.52258	ITGA1;FN1;THBS4	ITGA1;FN1;THBS4	0.315021	0.567468	Human Diseases
path:bta05320	Autoimmune thyroid disease	1	47	67	8158	0.0212766	0.0082128	2.59066	TPO	TPO	0.32206	0.567468	Human Diseases
path:bta05031	Amphetamine addiction	1	47	67	8158	0.0212766	0.0082128	2.59066	PRKCB	PRKCB	0.32206	0.567468	Human Diseases
path:bta05223	Non-small cell lung cancer	1	47	67	8158	0.0212766	0.0082128	2.59066	PRKCB	PRKCB	0.32206	0.567468	Human Diseases
path:bta04720	Long-term potentiation	1	47	69	8158	0.0212766	0.00845796	2.51557	PRKCB	PRKCB	0.329914	0.567468	Organismal Systems
path:bta05100	Bacterial invasion of epithelial cells	1	47	74	8158	0.0212766	0.00907085	2.3456	FN1	FN1	0.349161	0.567468	Human Diseases
path:bta00983	Drug metabolism - other enzymes	1	47	74	8158	0.0212766	0.00907085	2.3456	CES2	CES2	0.349161	0.567468	Metabolism
path:bta04971	Gastric acid secretion	1	47	74	8158	0.0212766	0.00907085	2.3456	PRKCB	PRKCB	0.349161	0.567468	Organismal Systems
path:bta05140	Leishmaniasis	1	47	76	8158	0.0212766	0.00931601	2.28387	PRKCB	PRKCB	0.356707	0.567468	Human Diseases
path:bta04260	Cardiac muscle contraction	1	47	76	8158	0.0212766	0.00931601	2.28387	CACNG7	CACNG7	0.356707	0.567468	Organismal Systems
path:bta05133	Pertussis	1	47	77	8158	0.0212766	0.00943859	2.25421	LY96	LY96	0.360448	0.567468	Human Diseases
path:bta05214	Glioma	1	47	77	8158	0.0212766	0.00943859	2.25421	PRKCB	PRKCB	0.360448	0.567468	Human Diseases
path:bta04721	Synaptic vesicle cycle	1	47	78	8158	0.0212766	0.00956117	2.22531	SLC6A4	SLC6A4	0.364168	0.567468	Organismal Systems
path:bta05200	Pathways in cancer	4	47	531	8158	0.0851064	0.0650895	1.30753	EPOR;NQO1;FN1;PRKCB	EPOR;NQO1;FN1;PRKCB	0.366396	0.567468	Human Diseases
path:bta01521	EGFR tyrosine kinase inhibitor resistance	1	47	80	8158	0.0212766	0.00980633	2.16968	PRKCB	PRKCB	0.371544	0.568507	Human Diseases
path:bta04976	Bile secretion	1	47	83	8158	0.0212766	0.0101741	2.09126	ABCB4	ABCB4	0.382451	0.5711	Organismal Systems
path:bta04911	Insulin secretion	1	47	84	8158	0.0212766	0.0102966	2.06636	PRKCB	PRKCB	0.386046	0.5711	Organismal Systems
path:bta05132	Salmonella infection	1	47	85	8158	0.0212766	0.0104192	2.04205	FLNA	FLNA	0.38962	0.5711	Human Diseases
path:bta04610	Complement and coagulation cascades	1	47	87	8158	0.0212766	0.0106644	1.99511	CR2	CR2	0.396706	0.5711	Organismal Systems
path:bta04666	Fc gamma R-mediated phagocytosis	1	47	87	8158	0.0212766	0.0106644	1.99511	PRKCB	PRKCB	0.396706	0.5711	Organismal Systems
path:bta04914	Progesterone-mediated oocyte maturation	1	47	88	8158	0.0212766	0.010787	1.97244	CPEB1	CPEB1	0.40022	0.5711	Organismal Systems
path:bta04540	Gap junction	1	47	90	8158	0.0212766	0.0110321	1.92861	PRKCB	PRKCB	0.407186	0.573875	Cellular Processes
path:bta04912	GnRH signaling pathway	1	47	93	8158	0.0212766	0.0113999	1.86639	PRKCB	PRKCB	0.417487	0.573875	Organismal Systems
path:bta04925	Aldosterone synthesis and secretion	1	47	94	8158	0.0212766	0.0115224	1.84654	PRKCB	PRKCB	0.420882	0.573875	Organismal Systems
path:bta05222	Small cell lung cancer	1	47	94	8158	0.0212766	0.0115224	1.84654	FN1	FN1	0.420882	0.573875	Human Diseases
path:bta04066	HIF-1 signaling pathway	1	47	98	8158	0.0212766	0.0120127	1.77117	PRKCB	PRKCB	0.434268	0.573875	Environmental Information Processing
path:bta04713	Circadian entrainment	1	47	99	8158	0.0212766	0.0121353	1.75328	PRKCB	PRKCB	0.437567	0.573875	Organismal Systems
path:bta04070	Phosphatidylinositol signaling system	1	47	99	8158	0.0212766	0.0121353	1.75328	PRKCB	PRKCB	0.437567	0.573875	Environmental Information Processing
path:bta05231	Choline metabolism in cancer	1	47	100	8158	0.0212766	0.0122579	1.73574	PRKCB	PRKCB	0.440847	0.573875	Human Diseases
path:bta04750	Inflammatory mediator regulation of TRP channels	1	47	102	8158	0.0212766	0.0125031	1.70171	PRKCB	PRKCB	0.447351	0.573875	Organismal Systems
path:bta04916	Melanogenesis	1	47	102	8158	0.0212766	0.0125031	1.70171	PRKCB	PRKCB	0.447351	0.573875	Organismal Systems
path:bta04928	Parathyroid hormone synthesis, secretion and action	1	47	105	8158	0.0212766	0.0128708	1.65309	PRKCB	PRKCB	0.456969	0.580351	Organismal Systems
path:bta04620	Toll-like receptor signaling pathway	1	47	110	8158	0.0212766	0.0134837	1.57795	LY96	LY96	0.472635	0.592076	Organismal Systems
path:bta04724	Glutamatergic synapse	1	47	113	8158	0.0212766	0.0138514	1.53606	PRKCB	PRKCB	0.481822	0.592076	Organismal Systems
path:bta05145	Toxoplasmosis	1	47	113	8158	0.0212766	0.0138514	1.53606	LY96	LY96	0.481822	0.592076	Human Diseases
path:bta04725	Cholinergic synapse	1	47	114	8158	0.0212766	0.013974	1.52258	PRKCB	PRKCB	0.484849	0.592076	Organismal Systems
path:bta04114	Oocyte meiosis	1	47	116	8158	0.0212766	0.0142192	1.49633	CPEB1	CPEB1	0.490852	0.593697	Cellular Processes
path:bta04071	Sphingolipid signaling pathway	1	47	119	8158	0.0212766	0.0145869	1.45861	PRKCB	PRKCB	0.499728	0.598731	Environmental Information Processing
path:bta04152	AMPK signaling pathway	1	47	123	8158	0.0212766	0.0150772	1.41117	FBP1	FBP1	0.511327	0.606902	Environmental Information Processing
path:bta04728	Dopaminergic synapse	1	47	132	8158	0.0212766	0.0161804	1.31496	PRKCB	PRKCB	0.536472	0.630851	Organismal Systems
path:bta04910	Insulin signaling pathway	1	47	137	8158	0.0212766	0.0167933	1.26697	FBP1	FBP1	0.549889	0.640696	Organismal Systems
path:bta05418	Fluid shear stress and atherosclerosis	1	47	142	8158	0.0212766	0.0174062	1.22236	NQO1	NQO1	0.562926	0.641224	Human Diseases
path:bta05206	MicroRNAs in cancer	1	47	143	8158	0.0212766	0.0175288	1.21381	PRKCB	PRKCB	0.565489	0.641224	Human Diseases
path:bta04261	Adrenergic signaling in cardiomyocytes	1	47	143	8158	0.0212766	0.0175288	1.21381	CACNG7	CACNG7	0.565489	0.641224	Organismal Systems
path:bta04650	Natural killer cell mediated cytotoxicity	1	47	152	8158	0.0212766	0.018632	1.14194	PRKCB	PRKCB	0.587901	0.648932	Organismal Systems
path:bta05161	Hepatitis B	1	47	152	8158	0.0212766	0.018632	1.14194	PRKCB	PRKCB	0.587901	0.648932	Human Diseases
path:bta04932	Non-alcoholic fatty liver disease (NAFLD)	1	47	154	8158	0.0212766	0.0188772	1.12711	MLXIPL	MLXIPL	0.592725	0.648932	Human Diseases
path:bta04150	mTOR signaling pathway	1	47	154	8158	0.0212766	0.0188772	1.12711	PRKCB	PRKCB	0.592725	0.648932	Environmental Information Processing
path:bta04218	Cellular senescence	1	47	163	8158	0.0212766	0.0199804	1.06487	GATA4	GATA4	0.613761	0.666219	Cellular Processes
path:bta04145	Phagosome	1	47	167	8158	0.0212766	0.0204707	1.03937	THBS4	THBS4	0.622765	0.670264	Cellular Processes
path:bta04062	Chemokine signaling pathway	1	47	189	8158	0.0212766	0.0231674	0.918383	PRKCB	PRKCB	0.668735	0.713692	Organismal Systems
path:bta04630	Jak-STAT signaling pathway	1	47	202	8158	0.0212766	0.024761	0.85928	EPOR	EPOR	0.693272	0.733713	Environmental Information Processing
path:bta04015	Rap1 signaling pathway	1	47	210	8158	0.0212766	0.0257416	0.826545	PRKCB	PRKCB	0.707478	0.738273	Environmental Information Processing
path:bta04024	cAMP signaling pathway	1	47	211	8158	0.0212766	0.0258642	0.822628	MYL9	MYL9	0.709207	0.738273	Environmental Information Processing
path:bta05169	Epstein-Barr virus infection	1	47	224	8158	0.0212766	0.0274577	0.774886	CR2	CR2	0.730804	0.75457	Human Diseases
path:bta05170	Human immunodeficiency virus 1 infection	1	47	230	8158	0.0212766	0.0281932	0.754672	PRKCB	PRKCB	0.740235	0.758144	Human Diseases
path:bta04014	Ras signaling pathway	1	47	240	8158	0.0212766	0.029419	0.723227	PRKCB	PRKCB	0.755238	0.764153	Environmental Information Processing
path:bta05163	Human cytomegalovirus infection	1	47	242	8158	0.0212766	0.0296641	0.71725	PRKCB	PRKCB	0.758136	0.764153	Human Diseases
path:bta04060	Cytokine-cytokine receptor interaction	1	47	323	8158	0.0212766	0.039593	0.537382	EPOR	EPOR	0.851058	0.851058	Environmental Information Processing

## Sheet: Abomasum
Term_ID	Term_description	ListHit	ListTotal	PopHit	PopTotal	GeneRatio	BgRatio	Enrichment_score	GeneIds	GeneSymbols	p-value	FDR_bh	Classification_level1
path:bta04672	Intestinal immune network for IgA production	5	36	55	8158	0.138889	0.00674185	20.601	PIGR;CD40LG;TNFSF13B;TNFRSF17;CCR10	PIGR;CD40LG;TNFSF13B;TNFRSF17;CCR10	3.72063e-06	0.000346018	Organismal Systems
path:bta04060	Cytokine-cytokine receptor interaction	7	36	323	8158	0.194444	0.039593	4.91108	IL17RB;CD40LG;TNFSF13B;IL18RAP;TNFRSF17;CCR10;IL7	IL17RB;CD40LG;TNFSF13B;IL18RAP;TNFRSF17;CCR10;IL7	0.000442517	0.020577	Environmental Information Processing
path:bta05145	Toxoplasmosis	4	36	113	8158	0.111111	0.0138514	8.02163	ALOX5;PIK3R5;CD40LG;CIITA	ALOX5;PIK3R5;CD40LG;CIITA	0.00146073	0.0452825	Human Diseases
path:bta04664	Fc epsilon RI signaling pathway	3	36	70	8158	0.0833333	0.00858053	9.7119	ALOX5;MS4A2;ALOX5AP	ALOX5;MS4A2;ALOX5AP	0.00352727	0.0820091	Organismal Systems
path:bta05310	Asthma	2	36	37	8158	0.0555556	0.00453543	12.2492	MS4A2;CD40LG	MS4A2;CD40LG	0.011445	0.196289	Human Diseases
path:bta05340	Primary immunodeficiency	2	36	39	8158	0.0555556	0.00478058	11.6211	CD40LG;CIITA	CD40LG;CIITA	0.0126638	0.196289	Human Diseases
path:bta04071	Sphingolipid signaling pathway	3	36	119	8158	0.0833333	0.0145869	5.71289	MS4A2;ASAH2;S1PR5	MS4A2;ASAH2;S1PR5	0.0152263	0.202292	Environmental Information Processing
path:bta05321	Inflammatory bowel disease (IBD)	2	36	68	8158	0.0555556	0.00833538	6.66503	FOXP3;IL18RAP	FOXP3;IL18RAP	0.0359521	0.399989	Human Diseases
path:bta04920	Adipocytokine signaling pathway	2	36	72	8158	0.0555556	0.00882569	6.29475	ACSL5;PRKAG3	ACSL5;PRKAG3	0.039901	0.399989	Organismal Systems
path:bta04976	Bile secretion	2	36	83	8158	0.0555556	0.0101741	5.46051	SLC10A2;AQP4	SLC10A2;AQP4	0.0515535	0.399989	Organismal Systems
path:bta04146	Peroxisome	2	36	84	8158	0.0555556	0.0102966	5.3955	PEX5L;ACSL5	PEX5L;ACSL5	0.0526673	0.399989	Cellular Processes
path:bta00061	Fatty acid biosynthesis	1	36	13	8158	0.0277778	0.00159353	17.4316	ACSL5	ACSL5	0.0559125	0.399989	Metabolism
path:bta00430	Taurine and hypotaurine metabolism	1	36	13	8158	0.0277778	0.00159353	17.4316	GGT6	GGT6	0.0559125	0.399989	Metabolism
path:bta04064	NF-kappa B signaling pathway	2	36	96	8158	0.0555556	0.0117676	4.72106	TNFSF13B;CD40LG	TNFSF13B;CD40LG	0.0666836	0.442969	Environmental Information Processing
path:bta00910	Nitrogen metabolism	1	36	17	8158	0.0277778	0.00208384	13.3301	CA4	CA4	0.0724962	0.449476	Metabolism
path:bta04151	PI3K-Akt signaling pathway	4	36	373	8158	0.111111	0.045722	2.43015	COL6A5;ERBB4;PIK3R5;IL7	COL6A5;ERBB4;PIK3R5;IL7	0.0802497	0.454369	Environmental Information Processing
path:bta04974	Protein digestion and absorption	2	36	113	8158	0.0555556	0.0138514	4.01082	COL6A5;CPA3	COL6A5;CPA3	0.0883785	0.454369	Organismal Systems
path:bta04725	Cholinergic synapse	2	36	114	8158	0.0555556	0.013974	3.97563	PIK3R5;CHAT	PIK3R5;CHAT	0.0897143	0.454369	Organismal Systems
path:bta04964	Proximal tubule bicarbonate reclamation	1	36	22	8158	0.0277778	0.00269674	10.3005	CA4	CA4	0.092828	0.454369	Organismal Systems
path:bta04614	Renin-angiotensin system	1	36	26	8158	0.0277778	0.00318706	8.71581	CPA3	CPA3	0.108781	0.479471	Organismal Systems
path:bta00630	Glyoxylate and dicarboxylate metabolism	1	36	30	8158	0.0277778	0.00367737	7.5537	AFMID	AFMID	0.124461	0.479471	Metabolism
path:bta04371	Apelin signaling pathway	2	36	140	8158	0.0555556	0.0171611	3.2373	PIK3R5;PRKAG3	PIK3R5;PRKAG3	0.126381	0.479471	Environmental Information Processing
path:bta04710	Circadian rhythm	1	36	31	8158	0.0277778	0.00379995	7.31004	PRKAG3	PRKAG3	0.128339	0.479471	Organismal Systems
path:bta00512	Mucin type O-glycan biosynthesis	1	36	31	8158	0.0277778	0.00379995	7.31004	ST6GALNAC1	ST6GALNAC1	0.128339	0.479471	Metabolism
path:bta00051	Fructose and mannose metabolism	1	36	34	8158	0.0277778	0.00416769	6.66503	KHK	KHK	0.139872	0.479471	Metabolism
path:bta04921	Oxytocin signaling pathway	2	36	150	8158	0.0555556	0.0183869	3.02148	PIK3R5;PRKAG3	PIK3R5;PRKAG3	0.141322	0.479471	Organismal Systems
path:bta04072	Phospholipase D signaling pathway	2	36	150	8158	0.0555556	0.0183869	3.02148	MS4A2;PIK3R5	MS4A2;PIK3R5	0.141322	0.479471	Environmental Information Processing
path:bta04514	Cell adhesion molecules (CAMs)	2	36	152	8158	0.0555556	0.018632	2.98173	SELL;CD40LG	SELL;CD40LG	0.144357	0.479471	Environmental Information Processing
path:bta00790	Folate biosynthesis	1	36	37	8158	0.0277778	0.00453543	6.12462	TH	TH	0.151258	0.485068	Metabolism
path:bta00350	Tyrosine metabolism	1	36	39	8158	0.0277778	0.00478058	5.81054	TH	TH	0.158766	0.491018	Metabolism
path:bta00071	Fatty acid degradation	1	36	42	8158	0.0277778	0.00514832	5.3955	ACSL5	ACSL5	0.169908	0.491018	Metabolism
path:bta04080	Neuroactive ligand-receptor interaction	3	36	330	8158	0.0833333	0.0404511	2.0601	HRH4;PTGDR;S1PR5	HRH4;PTGDR;S1PR5	0.177079	0.491018	Environmental Information Processing
path:bta04216	Ferroptosis	1	36	45	8158	0.0277778	0.00551606	5.0358	ACSL5	ACSL5	0.180907	0.491018	Cellular Processes
path:bta00380	Tryptophan metabolism	1	36	45	8158	0.0277778	0.00551606	5.0358	AFMID	AFMID	0.180907	0.491018	Metabolism
path:bta05030	Cocaine addiction	1	36	48	8158	0.0277778	0.0058838	4.72106	TH	TH	0.191764	0.491018	Human Diseases
path:bta00600	Sphingolipid metabolism	1	36	49	8158	0.0277778	0.00600637	4.62472	ASAH2	ASAH2	0.195351	0.491018	Metabolism
path:bta04962	Vasopressin-regulated water reabsorption	1	36	49	8158	0.0277778	0.00600637	4.62472	AQP4	AQP4	0.195351	0.491018	Organismal Systems
path:bta04062	Chemokine signaling pathway	2	36	189	8158	0.0555556	0.0231674	2.398	PIK3R5;CCR10	PIK3R5;CCR10	0.202606	0.491283	Organismal Systems
path:bta05330	Allograft rejection	1	36	52	8158	0.0277778	0.00637411	4.35791	CD40LG	CD40LG	0.206022	0.491283	Human Diseases
path:bta04913	Ovarian steroidogenesis	1	36	54	8158	0.0277778	0.00661927	4.1965	ALOX5	ALOX5	0.213059	0.495362	Organismal Systems
path:bta00480	Glutathione metabolism	1	36	58	8158	0.0277778	0.00710959	3.90709	GGT6	GGT6	0.226952	0.502536	Metabolism
path:bta05144	Malaria	1	36	58	8158	0.0277778	0.00710959	3.90709	CD40LG	CD40LG	0.226952	0.502536	Human Diseases
path:bta04213	Longevity regulating pathway - multiple species	1	36	62	8158	0.0277778	0.0075999	3.65502	PRKAG3	PRKAG3	0.240606	0.514243	Organismal Systems
path:bta05223	Non-small cell lung cancer	1	36	67	8158	0.0277778	0.0082128	3.38226	RASSF5	RASSF5	0.257344	0.514243	Human Diseases
path:bta05031	Amphetamine addiction	1	36	67	8158	0.0277778	0.0082128	3.38226	TH	TH	0.257344	0.514243	Human Diseases
path:bta05320	Autoimmune thyroid disease	1	36	67	8158	0.0277778	0.0082128	3.38226	CD40LG	CD40LG	0.257344	0.514243	Human Diseases
path:bta04714	Thermogenesis	2	36	224	8158	0.0555556	0.0274577	2.02331	ACSL5;PRKAG3	ACSL5;PRKAG3	0.259886	0.514243	Organismal Systems
path:bta05416	Viral myocarditis	1	36	70	8158	0.0277778	0.00858053	3.2373	CD40LG	CD40LG	0.267215	0.517728	Human Diseases
path:bta03320	PPAR signaling pathway	1	36	77	8158	0.0277778	0.00943859	2.943	ACSL5	ACSL5	0.289752	0.526912	Organismal Systems
path:bta00590	Arachidonic acid metabolism	1	36	80	8158	0.0277778	0.00980633	2.83264	ALOX5	ALOX5	0.299203	0.526912	Metabolism
path:bta04612	Antigen processing and presentation	1	36	81	8158	0.0277778	0.0099289	2.79767	CIITA	CIITA	0.302326	0.526912	Organismal Systems
path:bta05410	Hypertrophic cardiomyopathy (HCM)	1	36	82	8158	0.0277778	0.0100515	2.76355	PRKAG3	PRKAG3	0.305436	0.526912	Human Diseases
path:bta04917	Prolactin signaling pathway	1	36	83	8158	0.0277778	0.0101741	2.73025	TH	TH	0.308532	0.526912	Organismal Systems
path:bta04512	ECM-receptor interaction	1	36	83	8158	0.0277778	0.0101741	2.73025	COL6A5	COL6A5	0.308532	0.526912	Environmental Information Processing
path:bta04012	ErbB signaling pathway	1	36	84	8158	0.0277778	0.0102966	2.69775	ERBB4	ERBB4	0.311615	0.526912	Environmental Information Processing
path:bta04657	IL-17 signaling pathway	1	36	90	8158	0.0277778	0.0110321	2.5179	IL17RB	IL17RB	0.329832	0.538147	Organismal Systems
path:bta04211	Longevity regulating pathway	1	36	90	8158	0.0277778	0.0110321	2.5179	PRKAG3	PRKAG3	0.329832	0.538147	Organismal Systems
path:bta04972	Pancreatic secretion	1	36	96	8158	0.0277778	0.0117676	2.36053	CPA3	CPA3	0.347581	0.551565	Organismal Systems
path:bta04922	Glucagon signaling pathway	1	36	98	8158	0.0277778	0.0120127	2.31236	PRKAG3	PRKAG3	0.353395	0.551565	Organismal Systems
path:bta05323	Rheumatoid arthritis	1	36	99	8158	0.0277778	0.0121353	2.289	TNFSF13B	TNFSF13B	0.356283	0.551565	Human Diseases
path:bta00564	Glycerophospholipid metabolism	1	36	102	8158	0.0277778	0.0125031	2.22168	CHAT	CHAT	0.364872	0.551565	Metabolism
path:bta04660	T cell receptor signaling pathway	1	36	103	8158	0.0277778	0.0126256	2.20011	CD40LG	CD40LG	0.36771	0.551565	Organismal Systems
path:bta04931	Insulin resistance	1	36	109	8158	0.0277778	0.0133611	2.079	PRKAG3	PRKAG3	0.384482	0.557186	Human Diseases
path:bta04640	Hematopoietic cell lineage	1	36	110	8158	0.0277778	0.0134837	2.0601	IL7	IL7	0.387235	0.557186	Organismal Systems
path:bta04659	Th17 cell differentiation	1	36	112	8158	0.0277778	0.0137289	2.02331	FOXP3	FOXP3	0.392705	0.557186	Organismal Systems
path:bta04670	Leukocyte transendothelial migration	1	36	113	8158	0.0277778	0.0138514	2.00541	RASSF5	RASSF5	0.395422	0.557186	Organismal Systems
path:bta04726	Serotonergic synapse	1	36	116	8158	0.0277778	0.0142192	1.95354	ALOX5	ALOX5	0.403503	0.560087	Organismal Systems
path:bta04611	Platelet activation	1	36	119	8158	0.0277778	0.0145869	1.9043	PIK3R5	PIK3R5	0.411479	0.562758	Organismal Systems
path:bta04152	AMPK signaling pathway	1	36	123	8158	0.0277778	0.0150772	1.84237	PRKAG3	PRKAG3	0.421952	0.568719	Environmental Information Processing
path:bta04068	FoxO signaling pathway	1	36	132	8158	0.0277778	0.0161804	1.71675	PRKAG3	PRKAG3	0.444859	0.582462	Environmental Information Processing
path:bta04728	Dopaminergic synapse	1	36	132	8158	0.0277778	0.0161804	1.71675	TH	TH	0.444859	0.582462	Organismal Systems
path:bta05012	Parkinson disease	1	36	137	8158	0.0277778	0.0167933	1.6541	TH	TH	0.457201	0.582462	Human Diseases
path:bta04910	Insulin signaling pathway	1	36	137	8158	0.0277778	0.0167933	1.6541	PRKAG3	PRKAG3	0.457201	0.582462	Organismal Systems
path:bta04210	Apoptosis	1	36	142	8158	0.0277778	0.0174062	1.59585	SPTA1	SPTA1	0.469276	0.584858	Cellular Processes
path:bta04261	Adrenergic signaling in cardiomyocytes	1	36	143	8158	0.0277778	0.0175288	1.58469	PIK3R5	PIK3R5	0.47166	0.584858	Organismal Systems
path:bta04932	Non-alcoholic fatty liver disease (NAFLD)	1	36	154	8158	0.0277778	0.0188772	1.4715	PRKAG3	PRKAG3	0.497201	0.608417	Human Diseases
path:bta04218	Cellular senescence	1	36	163	8158	0.0277778	0.0199804	1.39025	RASSF5	RASSF5	0.517202	0.616663	Cellular Processes
path:bta04022	cGMP-PKG signaling pathway	1	36	163	8158	0.0277778	0.0199804	1.39025	PIK3R5	PIK3R5	0.517202	0.616663	Environmental Information Processing
path:bta05322	Systemic lupus erythematosus	1	36	175	8158	0.0277778	0.0214513	1.29492	CD40LG	CD40LG	0.54267	0.632475	Human Diseases
path:bta04530	Tight junction	1	36	178	8158	0.0277778	0.0218191	1.2731	PRKAG3	PRKAG3	0.54883	0.632475	Cellular Processes
path:bta05164	Influenza A	1	36	179	8158	0.0277778	0.0219417	1.26598	CIITA	CIITA	0.550865	0.632475	Human Diseases
path:bta05205	Proteoglycans in cancer	1	36	195	8158	0.0277778	0.0239029	1.16211	ERBB4	ERBB4	0.582242	0.638301	Human Diseases
path:bta04020	Calcium signaling pathway	1	36	195	8158	0.0277778	0.0239029	1.16211	ERBB4	ERBB4	0.582242	0.638301	Environmental Information Processing
path:bta05152	Tuberculosis	1	36	197	8158	0.0277778	0.0241481	1.15031	CIITA	CIITA	0.586011	0.638301	Human Diseases
path:bta04510	Focal adhesion	1	36	198	8158	0.0277778	0.0242707	1.1445	COL6A5	COL6A5	0.587883	0.638301	Cellular Processes
path:bta04630	Jak-STAT signaling pathway	1	36	202	8158	0.0277778	0.024761	1.12184	IL7	IL7	0.595289	0.638301	Environmental Information Processing
path:bta05167	Kaposi sarcoma-associated herpesvirus infection	1	36	203	8158	0.0277778	0.0248835	1.11631	PIK3R5	PIK3R5	0.597121	0.638301	Human Diseases
path:bta04015	Rap1 signaling pathway	1	36	210	8158	0.0277778	0.0257416	1.0791	RASSF5	RASSF5	0.609716	0.644359	Environmental Information Processing
path:bta05034	Alcoholism	1	36	218	8158	0.0277778	0.0267222	1.0395	TH	TH	0.623642	0.651671	Human Diseases
path:bta04014	Ras signaling pathway	1	36	240	8158	0.0277778	0.029419	0.944213	RASSF5	RASSF5	0.659494	0.681477	Environmental Information Processing
path:bta05200	Pathways in cancer	2	36	531	8158	0.0555556	0.0650895	0.853526	RASSF5;IL7	RASSF5;IL7	0.689784	0.704944	Human Diseases
path:bta04010	MAPK signaling pathway	1	36	292	8158	0.0277778	0.0357931	0.776065	ERBB4	ERBB4	0.73154	0.739491	Environmental Information Processing
path:bta05165	Human papillomavirus infection	1	36	342	8158	0.0277778	0.041922	0.662606	COL6A5	COL6A5	0.786716	0.786716	Human Diseases
