# Supplementary material for: Transcriptome profiling in rumen, reticulum, omasum, and abomasum tissues during the developmental transition of pre-ruminant to the ruminant in yaks
Source: Frontiers journal article supplement (doi:10.3389/fvets.2023.1204706), 2023-09-22
Supplement: Data_Sheet_1.zip [file Table S18-The top 20 KEGG enrichment in mRNAs module profile 41 of STEM in rumen, reticulum, omasum and abomasum.xls]

## Sheet: Rumen
Term_ID	Term_description	ListHit	ListTotal	PopHit	PopTotal	GeneRatio	BgRatio	Enrichment_score	GeneIds	GeneSymbols	p-value	FDR_bh	Classification_level1
path:hsa00280	Valine, leucine and isoleucine degradation	13	102	48	7246	0.127451	0.00662434	19.2398	4594;56922;3032;593;1738;3155;26275;10449;36;3033;1892;38;64087	MUT;MCCC1;HADHB;BCKDHA;DLD;HMGCL;HIBCH;ACAA2;ACADSB;HADH;ECHS1;ACAT1;MCCC2	5.00203e-14	7.35299e-12	Metabolism
path:hsa00020	Citrate cycle (TCA cycle)	11	102	31	7246	0.107843	0.00427822	25.2075	3417;8801;5160;1737;6391;1738;6392;4191;1743;5106;3420	IDH1;SUCLG2;PDHA1;DLAT;SDHC;DLD;SDHD;MDH2;DLST;PCK2;IDH3B	1.66393e-13	1.22299e-11	Metabolism
path:hsa00640	Propanoate metabolism	9	102	32	7246	0.0882353	0.00441623	19.9798	4594;8801;593;1738;26275;1892;55902;55862;38	MUT;SUCLG2;BCKDHA;DLD;HIBCH;ECHS1;ACSS2;ECHDC1;ACAT1	3.25581e-10	1.59535e-08	Metabolism
path:hsa00620	Pyruvate metabolism	9	102	40	7246	0.0882353	0.00552029	15.9838	5160;1737;1738;55902;4191;38;5106;4199;10873	PDHA1;DLAT;DLD;ACSS2;MDH2;ACAT1;PCK2;ME1;ME3	2.8919e-09	1.06277e-07	Metabolism
path:hsa04146	Peroxisome	11	102	83	7246	0.107843	0.0114546	9.41484	3417;55825;8504;3155;11001;8309;54677;373156;390916;1891;83594	IDH1;PECR;PEX3;HMGCL;SLC27A2;ACOX2;CROT;GSTK1;NUDT19;ECH1;NUDT12	1.73362e-08	5.09685e-07	Cellular Processes
path:hsa00630	Glyoxylate and dicarboxylate metabolism	6	102	30	7246	0.0588235	0.00414022	14.2078	4594;1738;132158;55902;4191;38	MUT;DLD;GLYCTK;ACSS2;MDH2;ACAT1	3.03051e-06	7.42474e-05	Metabolism
path:hsa00071	Fatty acid degradation	6	102	44	7246	0.0588235	0.00607232	9.68717	3032;10449;1892;36;3033;38	HADHB;ACAA2;ECHS1;ACADSB;HADH;ACAT1	3.07196e-05	0.000645111	Metabolism
path:hsa00380	Tryptophan metabolism	5	102	40	7246	0.0490196	0.00552029	8.8799	51166;4128;1892;3033;38	AADAT;MAOA;ECHS1;HADH;ACAT1	0.000222899	0.00409577	Metabolism
path:hsa00650	Butanoate metabolism	4	102	28	7246	0.0392157	0.0038642	10.1485	3155;1892;3033;38	HMGCL;ECHS1;HADH;ACAT1	0.00058446	0.00954618	Metabolism
path:hsa00062	Fatty acid elongation	4	102	30	7246	0.0392157	0.00414022	9.4719	10449;3032;1892;3033	ACAA2;HADHB;ECHS1;HADH	0.000765578	0.011254	Metabolism
path:hsa00310	Lysine degradation	5	102	59	7246	0.0490196	0.00814242	6.02027	51166;1892;3033;1743;38	AADAT;ECHS1;HADH;DLST;ACAT1	0.00137306	0.0183491	Metabolism
path:hsa04216	Ferroptosis	4	102	40	7246	0.0392157	0.00552029	7.10392	2495;55240;2937;10533	FTH1;STEAP3;GSS;ATG7	0.0022925	0.0280832	Cellular Processes
path:hsa00010	Glycolysis / Gluconeogenesis	5	102	69	7246	0.0490196	0.0095225	5.14777	5160;1737;1738;55902;5106	PDHA1;DLAT;DLD;ACSS2;PCK2	0.00275921	0.0312003	Metabolism
path:hsa00480	Glutathione metabolism	4	102	53	7246	0.0392157	0.00731438	5.36145	3417;4259;2937;373156	IDH1;MGST3;GSS;GSTK1	0.00639033	0.0670985	Metabolism
path:hsa00072	Synthesis and degradation of ketone bodies	2	102	10	7246	0.0196078	0.00138007	14.2078	3155;38	HMGCL;ACAT1	0.00820342	0.0803935	Metabolism
path:hsa00130	Ubiquinone and other terpenoid-quinone biosynthesis	2	102	11	7246	0.0196078	0.00151808	12.9162	51004;1728	COQ6;NQO1	0.00993491	0.091277	Metabolism
path:hsa05230	Central carbon metabolism in cancer	4	102	65	7246	0.0392157	0.00897047	4.37164	3417;23410;5160;51548	IDH1;SIRT3;PDHA1;SIRT6	0.013001	0.11242	Human Diseases
path:hsa00260	Glycine, serine and threonine metabolism	3	102	40	7246	0.0294118	0.00552029	5.32794	1738;4128;132158	DLD;MAOA;GLYCTK	0.0183566	0.149913	Metabolism
path:hsa03320	PPAR signaling pathway	4	102	74	7246	0.0392157	0.0102125	3.83996	8309;11001;5106;4199	ACOX2;SLC27A2;PCK2;ME1	0.0200827	0.155377	Organismal Systems
path:hsa00270	Cysteine and methionine metabolism	3	102	47	7246	0.0294118	0.00648634	4.53442	7263;2937;4191	TST;GSS;MDH2	0.0280806	0.206393	Metabolism

## Sheet: Reticulum
Term_ID	Term_description	ListHit	ListTotal	PopHit	PopTotal	GeneRatio	BgRatio	Enrichment_score	GeneIds	GeneSymbols	p-value	FDR_bh	Classification_level1
path:bta00280	Valine, leucine and isoleucine degradation	4	52	51	8158	0.0769231	0.00625153	12.3047	ECHS1;ACADS;HMGCL;MCEE	ECHS1;ACADS;HMGCL;MCEE	0.000294007	0.0296947	Metabolism
path:bta00650	Butanoate metabolism	3	52	28	8158	0.0576923	0.00343221	16.8091	ECHS1;ACADS;HMGCL	ECHS1;ACADS;HMGCL	0.000715121	0.0361136	Metabolism
path:bta00920	Sulfur metabolism	2	52	9	8158	0.0384615	0.00110321	34.8632	TST;SUOX	TST;SUOX	0.00139421	0.0469383	Metabolism
path:bta04146	Peroxisome	4	52	84	8158	0.0769231	0.0102966	7.4707	HMGCL;ECH1;MPV17L;DDO	HMGCL;ECH1;MPV17L;DDO	0.0019446	0.049101	Cellular Processes
path:bta04060	Cytokine-cytokine receptor interaction	7	52	323	8158	0.134615	0.039593	3.39998	IL17RB;IL7;PRLR;CCR8;EDA2R;IL1R2;EPOR	IL17RB;IL7;PRLR;CCR8;EDA2R;IL1R2;EPOR	0.00412661	0.0833576	Environmental Information Processing
path:bta04640	Hematopoietic cell lineage	4	52	110	8158	0.0769231	0.0134837	5.7049	IL1R2;IL7;CR2;EPOR	IL1R2;IL7;CR2;EPOR	0.00515269	0.086737	Organismal Systems
path:bta00630	Glyoxylate and dicarboxylate metabolism	2	52	30	8158	0.0384615	0.00367737	10.459	GLYCTK;MCEE	GLYCTK;MCEE	0.0154681	0.207909	Metabolism
path:bta00640	Propanoate metabolism	2	52	31	8158	0.0384615	0.00379995	10.1216	ECHS1;MCEE	ECHS1;MCEE	0.016468	0.207909	Metabolism
path:bta00071	Fatty acid degradation	2	52	42	8158	0.0384615	0.00514832	7.4707	ECHS1;ACADS	ECHS1;ACADS	0.0291686	0.307733	Metabolism
path:bta04978	Mineral absorption	2	52	43	8158	0.0384615	0.0052709	7.29696	SLC26A3;SLC39A4	SLC26A3;SLC39A4	0.0304686	0.307733	Organismal Systems
path:bta00270	Cysteine and methionine metabolism	2	52	47	8158	0.0384615	0.00576122	6.67594	TST;AHCYL2	TST;AHCYL2	0.0358928	0.329561	Metabolism
path:bta04122	Sulfur relay system	1	52	10	8158	0.0192308	0.00122579	15.6885	TST	TST	0.0619767	0.521638	Genetic Information Processing
path:bta00072	Synthesis and degradation of ketone bodies	1	52	11	8158	0.0192308	0.00134837	14.2622	HMGCL	HMGCL	0.0679631	0.528021	Metabolism
path:bta00983	Drug metabolism - other enzymes	2	52	74	8158	0.0384615	0.00907085	4.24012	CES2;UGT2A1	CES2;UGT2A1	0.0805212	0.580903	Metabolism
path:bta04742	Taste transduction	2	52	79	8158	0.0384615	0.00968375	3.97176	KCNK5;GABBR2	KCNK5;GABBR2	0.0900486	0.606327	Organismal Systems
path:bta00910	Nitrogen metabolism	1	52	17	8158	0.0192308	0.00208384	9.22851	CA12	CA12	0.103103	0.629402	Metabolism
path:bta04610	Complement and coagulation cascades	2	52	87	8158	0.0384615	0.0106644	3.60654	CR2;SERPINF2	CR2;SERPINF2	0.105939	0.629402	Organismal Systems
path:bta04972	Pancreatic secretion	2	52	96	8158	0.0384615	0.0117676	3.26843	SLC26A3;CLCA1	SLC26A3;CLCA1	0.124642	0.663281	Organismal Systems
path:bta04630	Jak-STAT signaling pathway	3	52	202	8158	0.0576923	0.024761	2.32997	IL7;PRLR;EPOR	IL7;PRLR;EPOR	0.137422	0.663281	Environmental Information Processing
path:bta00053	Ascorbate and aldarate metabolism	1	52	25	8158	0.0192308	0.00306448	6.27538	UGT2A1	UGT2A1	0.147941	0.663281	Metabolism

## Sheet: Omasum
Term_ID	Term_description	ListHit	ListTotal	PopHit	PopTotal	GeneRatio	BgRatio	Enrichment_score	GeneIds	GeneSymbols	p-value	FDR_bh	Classification_level1
path:bta04510	Focal adhesion	6	47	198	8158	0.12766	0.0242707	5.25983	ITGA1;FN1;PRKCB;FLNA;THBS4;MYL9	ITGA1;FN1;PRKCB;FLNA;THBS4;MYL9	0.000887949	0.112769	Cellular Processes
path:bta00230	Purine metabolism	4	47	134	8158	0.0851064	0.0164256	5.18133	AK4;GDA;NT5C1A;PDE6C	AK4;GDA;NT5C1A;PDE6C	0.00718974	0.345033	Metabolism
path:bta04512	ECM-receptor interaction	3	47	83	8158	0.0638298	0.0101741	6.27378	ITGA1;FN1;THBS4	ITGA1;FN1;THBS4	0.0119355	0.345033	Environmental Information Processing
path:bta04310	Wnt signaling pathway	4	47	159	8158	0.0851064	0.0194901	4.36665	SFRP4;DKK2;SFRP1;PRKCB	SFRP4;DKK2;SFRP1;PRKCB	0.0129326	0.345033	Environmental Information Processing
path:bta04710	Circadian rhythm	2	47	31	8158	0.0425532	0.00379995	11.1984	BHLHE41;NR1D1	BHLHE41;NR1D1	0.013584	0.345033	Organismal Systems
path:bta04931	Insulin resistance	3	47	109	8158	0.0638298	0.0133611	4.77728	SLC27A2;MLXIPL;PRKCB	SLC27A2;MLXIPL;PRKCB	0.0245877	0.404395	Human Diseases
path:bta04640	Hematopoietic cell lineage	3	47	110	8158	0.0638298	0.0134837	4.73385	EPOR;ITGA1;CR2	EPOR;ITGA1;CR2	0.0251768	0.404395	Organismal Systems
path:bta00270	Cysteine and methionine metabolism	2	47	47	8158	0.0425532	0.00576122	7.38615	AHCYL2;TST	AHCYL2;TST	0.0297953	0.404395	Metabolism
path:bta04270	Vascular smooth muscle contraction	3	47	129	8158	0.0638298	0.0158127	4.03662	EDN2;MYL9;PRKCB	EDN2;MYL9;PRKCB	0.0378144	0.404395	Organismal Systems
path:bta00920	Sulfur metabolism	1	47	9	8158	0.0212766	0.00110321	19.2861	TST	TST	0.0506963	0.404395	Metabolism
path:bta04921	Oxytocin signaling pathway	3	47	150	8158	0.0638298	0.0183869	3.47149	MYL9;CACNG7;PRKCB	MYL9;CACNG7;PRKCB	0.0549047	0.404395	Organismal Systems
path:bta00130	Ubiquinone and other terpenoid-quinone biosynthesis	1	47	10	8158	0.0212766	0.00122579	17.3574	NQO1	NQO1	0.0561714	0.404395	Metabolism
path:bta04122	Sulfur relay system	1	47	10	8158	0.0212766	0.00122579	17.3574	TST	TST	0.0561714	0.404395	Genetic Information Processing
path:bta05412	Arrhythmogenic right ventricular cardiomyopathy (ARVC)	2	47	68	8158	0.0425532	0.00833538	5.10513	ITGA1;CACNG7	ITGA1;CACNG7	0.0582074	0.404395	Human Diseases
path:bta04662	B cell receptor signaling pathway	2	47	74	8158	0.0425532	0.00907085	4.6912	CR2;PRKCB	CR2;PRKCB	0.0675464	0.404395	Organismal Systems
path:bta04918	Thyroid hormone synthesis	2	47	74	8158	0.0425532	0.00907085	4.6912	TPO;PRKCB	TPO;PRKCB	0.0675464	0.404395	Organismal Systems
path:bta03320	PPAR signaling pathway	2	47	77	8158	0.0425532	0.00943859	4.50843	SLC27A2;ACOX2	SLC27A2;ACOX2	0.0723914	0.404395	Organismal Systems
path:bta04742	Taste transduction	2	47	79	8158	0.0425532	0.00968375	4.39429	P2RX3;GABRA5	P2RX3;GABRA5	0.0756829	0.404395	Organismal Systems
path:bta05410	Hypertrophic cardiomyopathy (HCM)	2	47	82	8158	0.0425532	0.0100515	4.23352	ITGA1;CACNG7	ITGA1;CACNG7	0.0807086	0.404395	Human Diseases
path:bta04012	ErbB signaling pathway	2	47	84	8158	0.0425532	0.0102966	4.13273	BTC;PRKCB	BTC;PRKCB	0.084116	0.404395	Environmental Information Processing

## Sheet: Abomasum
Term_ID	Term_description	ListHit	ListTotal	PopHit	PopTotal	GeneRatio	BgRatio	Enrichment_score	GeneIds	GeneSymbols	p-value	FDR_bh	Classification_level1
path:bta04672	Intestinal immune network for IgA production	5	36	55	8158	0.138889	0.00674185	20.601	PIGR;CD40LG;TNFSF13B;TNFRSF17;CCR10	PIGR;CD40LG;TNFSF13B;TNFRSF17;CCR10	3.72063e-06	0.000346018	Organismal Systems
path:bta04060	Cytokine-cytokine receptor interaction	7	36	323	8158	0.194444	0.039593	4.91108	IL17RB;CD40LG;TNFSF13B;IL18RAP;TNFRSF17;CCR10;IL7	IL17RB;CD40LG;TNFSF13B;IL18RAP;TNFRSF17;CCR10;IL7	0.000442517	0.020577	Environmental Information Processing
path:bta05145	Toxoplasmosis	4	36	113	8158	0.111111	0.0138514	8.02163	ALOX5;PIK3R5;CD40LG;CIITA	ALOX5;PIK3R5;CD40LG;CIITA	0.00146073	0.0452825	Human Diseases
path:bta04664	Fc epsilon RI signaling pathway	3	36	70	8158	0.0833333	0.00858053	9.7119	ALOX5;MS4A2;ALOX5AP	ALOX5;MS4A2;ALOX5AP	0.00352727	0.0820091	Organismal Systems
path:bta05310	Asthma	2	36	37	8158	0.0555556	0.00453543	12.2492	MS4A2;CD40LG	MS4A2;CD40LG	0.011445	0.196289	Human Diseases
path:bta05340	Primary immunodeficiency	2	36	39	8158	0.0555556	0.00478058	11.6211	CD40LG;CIITA	CD40LG;CIITA	0.0126638	0.196289	Human Diseases
path:bta04071	Sphingolipid signaling pathway	3	36	119	8158	0.0833333	0.0145869	5.71289	MS4A2;ASAH2;S1PR5	MS4A2;ASAH2;S1PR5	0.0152263	0.202292	Environmental Information Processing
path:bta05321	Inflammatory bowel disease (IBD)	2	36	68	8158	0.0555556	0.00833538	6.66503	FOXP3;IL18RAP	FOXP3;IL18RAP	0.0359521	0.399989	Human Diseases
path:bta04920	Adipocytokine signaling pathway	2	36	72	8158	0.0555556	0.00882569	6.29475	ACSL5;PRKAG3	ACSL5;PRKAG3	0.039901	0.399989	Organismal Systems
path:bta04976	Bile secretion	2	36	83	8158	0.0555556	0.0101741	5.46051	SLC10A2;AQP4	SLC10A2;AQP4	0.0515535	0.399989	Organismal Systems
path:bta04146	Peroxisome	2	36	84	8158	0.0555556	0.0102966	5.3955	PEX5L;ACSL5	PEX5L;ACSL5	0.0526673	0.399989	Cellular Processes
path:bta00061	Fatty acid biosynthesis	1	36	13	8158	0.0277778	0.00159353	17.4316	ACSL5	ACSL5	0.0559125	0.399989	Metabolism
path:bta00430	Taurine and hypotaurine metabolism	1	36	13	8158	0.0277778	0.00159353	17.4316	GGT6	GGT6	0.0559125	0.399989	Metabolism
path:bta04064	NF-kappa B signaling pathway	2	36	96	8158	0.0555556	0.0117676	4.72106	TNFSF13B;CD40LG	TNFSF13B;CD40LG	0.0666836	0.442969	Environmental Information Processing
path:bta00910	Nitrogen metabolism	1	36	17	8158	0.0277778	0.00208384	13.3301	CA4	CA4	0.0724962	0.449476	Metabolism
path:bta04151	PI3K-Akt signaling pathway	4	36	373	8158	0.111111	0.045722	2.43015	COL6A5;ERBB4;PIK3R5;IL7	COL6A5;ERBB4;PIK3R5;IL7	0.0802497	0.454369	Environmental Information Processing
path:bta04974	Protein digestion and absorption	2	36	113	8158	0.0555556	0.0138514	4.01082	COL6A5;CPA3	COL6A5;CPA3	0.0883785	0.454369	Organismal Systems
path:bta04725	Cholinergic synapse	2	36	114	8158	0.0555556	0.013974	3.97563	PIK3R5;CHAT	PIK3R5;CHAT	0.0897143	0.454369	Organismal Systems
path:bta04964	Proximal tubule bicarbonate reclamation	1	36	22	8158	0.0277778	0.00269674	10.3005	CA4	CA4	0.092828	0.454369	Organismal Systems
path:bta04614	Renin-angiotensin system	1	36	26	8158	0.0277778	0.00318706	8.71581	CPA3	CPA3	0.108781	0.479471	Organismal Systems
