# Supplementary material for: Transcriptome profiling in rumen, reticulum, omasum, and abomasum tissues during the developmental transition of pre-ruminant to the ruminant in yaks
Source: Frontiers journal article supplement (doi:10.3389/fvets.2023.1204706), 2023-09-22
Supplement: Data_Sheet_1.zip [file Table S19-The GO enrichment in turquoise module of WGCNA.xlsx]

## Sheet: Table S19
id	Term	Category	ListHits	ListTotal	PopHits	PopTotal	p-value	q-value	Enrichment_score	geneID
GO:0001708	cell fate specification	biological_process	2	38	10	16890	0.000219293	0.01348	88.8947	IHH;LOC102275331
GO:0120162	positive regulation of cold-induced thermogenesis	biological_process	3	38	54	16890	0.000240764	0.01348	24.693	PRDM16;ESRRG;LOC102269331
GO:0002053	positive regulation of mesenchymal cell proliferation	biological_process	2	38	11	16890	0.000267645	0.01348	80.8134	IHH;LOC102275331
GO:0003382	epithelial cell morphogenesis	biological_process	2	38	13	16890	0.000378492	0.0145953	68.3806	IHH;VSIG1
GO:0098719	sodium ion import across plasma membrane	biological_process	2	38	14	16890	0.000440948	0.0145953	63.4962	SLC9A4;SLC9A1
GO:0048557	embryonic digestive tract morphogenesis	biological_process	2	38	15	16890	0.000508064	0.0145953	59.2632	IHH;HNF1B
GO:0070059	intrinsic apoptotic signaling pathway in response to endoplasmic reticulum stress	biological_process	2	38	19	16890	0.000822734	0.0199988	46.7867	ERN2;RNF186
GO:0090103	cochlea morphogenesis	biological_process	2	38	19	16890	0.000822734	0.0199988	46.7867	HPN;LOC102275331
GO:0071805	potassium ion transmembrane transport	biological_process	3	38	87	16890	0.000977567	0.0220651	15.3267	SLC9A4;SLC9A1;HPN
GO:0035019	somatic stem cell population maintenance	biological_process	2	38	23	16890	0.00121037	0.0254985	38.6499	PRDM16;LOC102275331
GO:0051453	regulation of intracellular pH	biological_process	2	38	25	16890	0.00143116	0.0266028	35.5579	SLC9A4;SLC9A1
GO:0050679	positive regulation of epithelial cell proliferation	biological_process	2	38	31	16890	0.00219952	0.0365814	28.6757	IHH;LOC102275331
GO:0050680	negative regulation of epithelial cell proliferation	biological_process	2	38	34	16890	0.00264236	0.0417493	26.1455	HPN;LOC102275331
GO:0051216	cartilage development	biological_process	2	38	42	16890	0.00400973	0.0575942	21.1654	IHH;LOC102275331
GO:0045893	positive regulation of transcription, DNA-templated	biological_process	4	38	369	16890	0.00921078	0.0741977	4.81814	PRDM16;HNF1B;ESRRG;LOC102269331
GO:0003203	endocardial cushion morphogenesis	biological_process	1	38	5	16890	0.0112001	0.0741977	88.8947	LOC102275331
GO:0003406	retinal pigment epithelium development	biological_process	1	38	5	16890	0.0112001	0.0741977	88.8947	IHH
GO:0010564	regulation of cell cycle process	biological_process	1	38	5	16890	0.0112001	0.0741977	88.8947	LOC102275331
GO:0030277	maintenance of gastrointestinal epithelium	biological_process	1	38	5	16890	0.0112001	0.0741977	88.8947	VSIG1
GO:0030851	granulocyte differentiation	biological_process	1	38	5	16890	0.0112001	0.0741977	88.8947	ZFPM1
GO:0032237	activation of store-operated calcium channel activity	biological_process	1	38	5	16890	0.0112001	0.0741977	88.8947	CRACR2A
GO:0033085	negative regulation of T cell differentiation in thymus	biological_process	1	38	5	16890	0.0112001	0.0741977	88.8947	IHH
GO:0045779	negative regulation of bone resorption	biological_process	1	38	5	16890	0.0112001	0.0741977	88.8947	CLDN18
GO:0048745	smooth muscle tissue development	biological_process	1	38	5	16890	0.0112001	0.0741977	88.8947	IHH
GO:0048806	genitalia development	biological_process	1	38	5	16890	0.0112001	0.0741977	88.8947	HNF1B
GO:0086009	membrane repolarization	biological_process	1	38	5	16890	0.0112001	0.0741977	88.8947	KCNQ1
GO:2000020	positive regulation of male gonad development	biological_process	1	38	5	16890	0.0112001	0.0741977	88.8947	LOC102275331
GO:2000347	positive regulation of hepatocyte proliferation	biological_process	1	38	5	16890	0.0112001	0.0741977	88.8947	HPN
GO:0001501	skeletal system development	biological_process	2	38	73	16890	0.0117148	0.0741977	12.1774	IHH;LOC102275331
GO:0001696	gastric acid secretion	biological_process	1	38	6	16890	0.0134254	0.0741977	74.0789	SLC9A4
GO:0002115	store-operated calcium entry	biological_process	1	38	6	16890	0.0134254	0.0741977	74.0789	CRACR2A
GO:0009247	glycolipid biosynthetic process	biological_process	1	38	6	16890	0.0134254	0.0741977	74.0789	GAL3ST1
GO:0010756	positive regulation of plasminogen activation	biological_process	1	38	6	16890	0.0134254	0.0741977	74.0789	HPN
GO:0030853	negative regulation of granulocyte differentiation	biological_process	1	38	6	16890	0.0134254	0.0741977	74.0789	PRDM16
GO:0033089	positive regulation of T cell differentiation in thymus	biological_process	1	38	6	16890	0.0134254	0.0741977	74.0789	IHH
GO:0035519	protein K29-linked ubiquitination	biological_process	1	38	6	16890	0.0134254	0.0741977	74.0789	RNF186
GO:0035773	insulin secretion involved in cellular response to glucose stimulus	biological_process	1	38	6	16890	0.0134254	0.0741977	74.0789	PTPRN2
GO:0043457	regulation of cellular respiration	biological_process	1	38	6	16890	0.0134254	0.0741977	74.0789	PRDM16
GO:0048012	hepatocyte growth factor receptor signaling pathway	biological_process	1	38	6	16890	0.0134254	0.0741977	74.0789	HPN
GO:0060372	regulation of atrial cardiac muscle cell membrane repolarization	biological_process	1	38	6	16890	0.0134254	0.0741977	74.0789	KCNQ1
GO:0001894	tissue homeostasis	biological_process	1	38	7	16890	0.0156458	0.0772513	63.4962	LOC102275331
GO:0016458	gene silencing	biological_process	1	38	7	16890	0.0156458	0.0772513	63.4962	KCNQ1
GO:0050673	epithelial cell proliferation	biological_process	1	38	7	16890	0.0156458	0.0772513	63.4962	HNF1B
GO:0060413	atrial septum morphogenesis	biological_process	1	38	7	16890	0.0156458	0.0772513	63.4962	ZFPM1
GO:0090336	positive regulation of brown fat cell differentiation	biological_process	1	38	7	16890	0.0156458	0.0772513	63.4962	PRDM16
GO:0002064	epithelial cell development	biological_process	1	38	8	16890	0.0178614	0.0773178	55.5592	SLC9A4
GO:0043586	tongue development	biological_process	1	38	8	16890	0.0178614	0.0773178	55.5592	PRDM16
GO:0045078	positive regulation of interferon-gamma biosynthetic process	biological_process	1	38	8	16890	0.0178614	0.0773178	55.5592	ZFPM1
GO:0048754	branching morphogenesis of an epithelial tube	biological_process	1	38	8	16890	0.0178614	0.0773178	55.5592	HNF1B
GO:0090136	epithelial cell-cell adhesion	biological_process	1	38	8	16890	0.0178614	0.0773178	55.5592	IHH
GO:1901381	positive regulation of potassium ion transmembrane transport	biological_process	1	38	8	16890	0.0178614	0.0773178	55.5592	KCNQ1
GO:0001678	cellular glucose homeostasis	biological_process	1	38	9	16890	0.0200721	0.0773609	49.386	FOXA3
GO:0010447	response to acidic pH	biological_process	1	38	9	16890	0.0200721	0.0773609	49.386	SLC9A1
GO:0035162	embryonic hemopoiesis	biological_process	1	38	9	16890	0.0200721	0.0773609	49.386	ZFPM1
GO:0050910	detection of mechanical stimulus involved in sensory perception of sound	biological_process	1	38	9	16890	0.0200721	0.0773609	49.386	HPN
GO:0001502	cartilage condensation	biological_process	1	38	10	16890	0.022278	0.0773609	44.4474	LOC102275331
GO:0002009	morphogenesis of an epithelium	biological_process	1	38	10	16890	0.022278	0.0773609	44.4474	LOC102275331
GO:0030220	platelet formation	biological_process	1	38	10	16890	0.022278	0.0773609	44.4474	ZFPM1
GO:0030279	negative regulation of ossification	biological_process	1	38	10	16890	0.022278	0.0773609	44.4474	LOC102275331
GO:0032958	inositol phosphate biosynthetic process	biological_process	1	38	10	16890	0.022278	0.0773609	44.4474	ITPKA
GO:0036376	sodium ion export across plasma membrane	biological_process	1	38	10	16890	0.022278	0.0773609	44.4474	SLC9A1
GO:0048596	embryonic camera-type eye morphogenesis	biological_process	1	38	10	16890	0.022278	0.0773609	44.4474	IHH
GO:0050872	white fat cell differentiation	biological_process	1	38	10	16890	0.022278	0.0773609	44.4474	PRDM16
GO:0071468	cellular response to acidic pH	biological_process	1	38	10	16890	0.022278	0.0773609	44.4474	SLC9A1
GO:0072358	cardiovascular system development	biological_process	1	38	10	16890	0.022278	0.0773609	44.4474	KCNQ1
GO:1900181	negative regulation of protein localization to nucleus	biological_process	1	38	10	16890	0.022278	0.0773609	44.4474	CLDN18
GO:0006349	regulation of gene expression by genetic imprinting	biological_process	1	38	11	16890	0.024479	0.0805767	40.4067	KCNQ1
GO:0035855	megakaryocyte development	biological_process	1	38	11	16890	0.024479	0.0805767	40.4067	ZFPM1
GO:0043923	positive regulation by host of viral transcription	biological_process	1	38	11	16890	0.024479	0.0805767	40.4067	HPN
GO:0000122	negative regulation of transcription by RNA polymerase II	biological_process	4	38	503	16890	0.0257986	0.0818385	3.53458	PRDM16;HNF1B;ZFPM1;SPDEF
GO:0006518	peptide metabolic process	biological_process	1	38	12	16890	0.0266752	0.0818385	37.0395	CPD
GO:0006885	regulation of pH	biological_process	1	38	12	16890	0.0266752	0.0818385	37.0395	SLC9A1
GO:0016075	rRNA catabolic process	biological_process	1	38	12	16890	0.0266752	0.0818385	37.0395	ERN2
GO:0050892	intestinal absorption	biological_process	1	38	12	16890	0.0266752	0.0818385	37.0395	KCNQ1
GO:0061053	somite development	biological_process	1	38	12	16890	0.0266752	0.0818385	37.0395	IHH
GO:0090190	positive regulation of branching involved in ureteric bud morphogenesis	biological_process	1	38	12	16890	0.0266752	0.0818385	37.0395	LOC102275331
GO:0097421	liver regeneration	biological_process	1	38	13	16890	0.0288666	0.0864271	34.1903	IHH
GO:0007283	spermatogenesis	biological_process	3	38	304	16890	0.0306327	0.0864271	4.38625	FOXA3;ADAM28;LOC102275331
GO:0030902	hindbrain development	biological_process	1	38	14	16890	0.0310532	0.0864271	31.7481	HNF1B
GO:0032331	negative regulation of chondrocyte differentiation	biological_process	1	38	14	16890	0.0310532	0.0864271	31.7481	LOC102275331
GO:0048709	oligodendrocyte differentiation	biological_process	1	38	14	16890	0.0310532	0.0864271	31.7481	LOC102275331
GO:0051928	positive regulation of calcium ion transport	biological_process	1	38	14	16890	0.0310532	0.0864271	31.7481	CRACR2A
GO:0055008	cardiac muscle tissue morphogenesis	biological_process	1	38	14	16890	0.0310532	0.0864271	31.7481	ZFPM1
GO:0060135	maternal process involved in female pregnancy	biological_process	1	38	14	16890	0.0310532	0.0864271	31.7481	IHH
GO:0070371	ERK1 and ERK2 cascade	biological_process	1	38	14	16890	0.0310532	0.0864271	31.7481	LOC102275331
GO:0007507	heart development	biological_process	2	38	123	16890	0.0311794	0.0864271	7.22721	ZFPM1;LOC102275331
GO:0030111	regulation of Wnt signaling pathway	biological_process	1	38	15	16890	0.033235	0.0888111	29.6316	HNF1B
GO:0048565	digestive tract development	biological_process	1	38	15	16890	0.033235	0.0888111	29.6316	CLDN18
GO:0060307	regulation of ventricular cardiac muscle cell membrane repolarization	biological_process	1	38	15	16890	0.033235	0.0888111	29.6316	KCNQ1
GO:0006665	sphingolipid metabolic process	biological_process	1	38	16	16890	0.035412	0.0888111	27.7796	GAL3ST1
GO:0009880	embryonic pattern specification	biological_process	1	38	16	16890	0.035412	0.0888111	27.7796	IHH
GO:0010460	positive regulation of heart rate	biological_process	1	38	16	16890	0.035412	0.0888111	27.7796	KCNQ1
GO:0010719	negative regulation of epithelial to mesenchymal transition	biological_process	1	38	16	16890	0.035412	0.0888111	27.7796	HPN
GO:0031016	pancreas development	biological_process	1	38	16	16890	0.035412	0.0888111	27.7796	IHH
GO:0032332	positive regulation of chondrocyte differentiation	biological_process	1	38	16	16890	0.035412	0.0888111	27.7796	LOC102275331
GO:0045453	bone resorption	biological_process	1	38	16	16890	0.035412	0.0888111	27.7796	IHH
GO:0060412	ventricular septum morphogenesis	biological_process	1	38	16	16890	0.035412	0.0888111	27.7796	ZFPM1
GO:0061003	positive regulation of dendritic spine morphogenesis	biological_process	1	38	16	16890	0.035412	0.0888111	27.7796	ITPKA
GO:0019933	cAMP-mediated signaling	biological_process	1	38	17	16890	0.0375842	0.0906612	26.1455	LOC102275331
GO:0031018	endocrine pancreas development	biological_process	1	38	17	16890	0.0375842	0.0906612	26.1455	HNF1B
GO:0032967	positive regulation of collagen biosynthetic process	biological_process	1	38	17	16890	0.0375842	0.0906612	26.1455	IHH
GO:0045662	negative regulation of myoblast differentiation	biological_process	1	38	18	16890	0.0397517	0.0944477	24.693	LOC102275331
GO:0043066	negative regulation of apoptotic process	biological_process	3	38	340	16890	0.040611	0.0957693	3.92183	IHH;HPN;LOC102275331
GO:0001837	epithelial to mesenchymal transition	biological_process	1	38	19	16890	0.0419144	0.0973894	23.3934	LOC102275331
GO:0071773	cellular response to BMP stimulus	biological_process	1	38	19	16890	0.0419144	0.0973894	23.3934	LOC102275331
GO:0001569	branching involved in blood vessel morphogenesis	biological_process	1	38	20	16890	0.0440724	0.0987722	22.2237	IHH
GO:0048469	cell maturation	biological_process	1	38	21	16890	0.0462257	0.10099	21.1654	IHH
GO:0050873	brown fat cell differentiation	biological_process	1	38	21	16890	0.0462257	0.10099	21.1654	PRDM16
GO:0045892	negative regulation of transcription, DNA-templated	biological_process	3	38	361	16890	0.0471077	0.101266	3.69369	ERN2;PRDM16;LOC102275331
GO:0010634	positive regulation of epithelial cell migration	biological_process	1	38	23	16890	0.050518	0.10572	19.3249	LOC102275331
GO:0030073	insulin secretion	biological_process	1	38	23	16890	0.050518	0.10572	19.3249	HNF1B
GO:0002062	chondrocyte differentiation	biological_process	1	38	24	16890	0.0526571	0.10805	18.5197	LOC102275331
GO:0043491	protein kinase B signaling	biological_process	1	38	24	16890	0.0526571	0.10805	18.5197	LOC102275331
GO:0043647	inositol phosphate metabolic process	biological_process	1	38	24	16890	0.0526571	0.10805	18.5197	ITPKA
GO:0007269	neurotransmitter secretion	biological_process	1	38	25	16890	0.0547915	0.111704	17.7789	PTPRN2
GO:0003151	outflow tract morphogenesis	biological_process	1	38	26	16890	0.0569212	0.113127	17.0951	ZFPM1
GO:0086091	regulation of heart rate by cardiac conduction	biological_process	1	38	26	16890	0.0569212	0.113127	17.0951	KCNQ1
GO:0045652	regulation of megakaryocyte differentiation	biological_process	1	38	27	16890	0.0590463	0.115177	16.462	ZFPM1
GO:0045880	positive regulation of smoothened signaling pathway	biological_process	1	38	27	16890	0.0590463	0.115177	16.462	IHH
GO:0001942	hair follicle development	biological_process	1	38	28	16890	0.0611667	0.117858	15.8741	LOC102275331
GO:0007257	activation of JUN kinase activity	biological_process	1	38	28	16890	0.0611667	0.117858	15.8741	ERN2
GO:0007154	cell communication	biological_process	1	38	29	16890	0.0632824	0.121195	15.3267	GJB1
GO:0071260	cellular response to mechanical stimulus	biological_process	1	38	30	16890	0.0653935	0.124012	14.8158	LOC102275331
GO:0007173	epidermal growth factor receptor signaling pathway	biological_process	1	38	31	16890	0.0675	0.124012	14.3379	LOC102275331
GO:0032355	response to estradiol	biological_process	1	38	31	16890	0.0675	0.124012	14.3379	IHH
GO:0048167	regulation of synaptic plasticity	biological_process	1	38	31	16890	0.0675	0.124012	14.3379	ITPKA
GO:0010107	potassium ion import	biological_process	1	38	32	16890	0.0696019	0.124788	13.8898	KCNJ16
GO:0048468	cell development	biological_process	1	38	32	16890	0.0696019	0.124788	13.8898	PRDM16
GO:0071364	cellular response to epidermal growth factor stimulus	biological_process	1	38	32	16890	0.0696019	0.124788	13.8898	LOC102275331
GO:0045944	positive regulation of transcription by RNA polymerase II	biological_process	4	38	696	16890	0.0698973	0.124788	2.55445	IHH;FOXA3;SPDEF;LOC102275331
GO:0009612	response to mechanical stimulus	biological_process	1	38	33	16890	0.0716991	0.125872	13.4689	IHH
GO:0009749	response to glucose	biological_process	1	38	34	16890	0.0737917	0.128122	13.0728	HNF1B
GO:0048839	inner ear development	biological_process	1	38	34	16890	0.0737917	0.128122	13.0728	KCNQ1
GO:0006633	fatty acid biosynthetic process	biological_process	1	38	35	16890	0.0758798	0.128914	12.6992	ACSM3
GO:0030218	erythrocyte differentiation	biological_process	1	38	35	16890	0.0758798	0.128914	12.6992	ZFPM1
GO:0035690	cellular response to drug	biological_process	1	38	35	16890	0.0758798	0.128914	12.6992	KCNQ1
GO:0071320	cellular response to cAMP	biological_process	1	38	35	16890	0.0758798	0.128914	12.6992	KCNQ1
GO:0014068	positive regulation of phosphatidylinositol 3-kinase signaling	biological_process	1	38	36	16890	0.0779632	0.131745	12.3465	LOC102275331
GO:0001947	heart looping	biological_process	1	38	38	16890	0.0821164	0.136573	11.6967	IHH
GO:0016485	protein processing	biological_process	1	38	39	16890	0.0841862	0.138556	11.3968	CPD
GO:0045599	negative regulation of fat cell differentiation	biological_process	1	38	40	16890	0.0862514	0.140492	11.1118	ZFPM1
GO:0019827	stem cell population maintenance	biological_process	1	38	41	16890	0.088312	0.142071	10.8408	PRDM16
GO:0009267	cellular response to starvation	biological_process	1	38	42	16890	0.0903682	0.142071	10.5827	FOXA3
GO:0022008	neurogenesis	biological_process	1	38	42	16890	0.0903682	0.142071	10.5827	PRDM16
GO:0030512	negative regulation of transforming growth factor beta receptor signaling pathway	biological_process	1	38	42	16890	0.0903682	0.142071	10.5827	PRDM16
GO:0060041	retina development in camera-type eye	biological_process	1	38	42	16890	0.0903682	0.142071	10.5827	LOC102275331
GO:0070534	protein K63-linked ubiquitination	biological_process	1	38	42	16890	0.0903682	0.142071	10.5827	RNF186
GO:0042733	embryonic digit morphogenesis	biological_process	1	38	43	16890	0.0924198	0.144578	10.3366	IHH
GO:0048666	neuron development	biological_process	1	38	44	16890	0.094467	0.147052	10.1017	IHH
GO:0032091	negative regulation of protein binding	biological_process	1	38	47	16890	0.100581	0.155043	9.45689	ZFPM1
GO:0030307	positive regulation of cell growth	biological_process	1	38	48	16890	0.102611	0.156642	9.25987	HPN
GO:0051259	protein complex oligomerization	biological_process	1	38	48	16890	0.102611	0.156642	9.25987	SLC9A1
GO:0060021	roof of mouth development	biological_process	1	38	49	16890	0.104635	0.158965	9.07089	PRDM16
GO:0051865	protein autoubiquitination	biological_process	1	38	51	16890	0.108672	0.163525	8.71517	RNF186
GO:0001822	kidney development	biological_process	1	38	54	16890	0.114693	0.170154	8.23099	HNF1B
GO:0006813	potassium ion transport	biological_process	1	38	54	16890	0.114693	0.170154	8.23099	KCNJ16
GO:0009653	anatomical structure morphogenesis	biological_process	1	38	54	16890	0.114693	0.170154	8.23099	FOXA3
GO:0040008	regulation of growth	biological_process	1	38	55	16890	0.116691	0.17231	8.08134	IHH
GO:0007224	smoothened signaling pathway	biological_process	1	38	56	16890	0.118685	0.173631	7.93703	IHH
GO:0034976	response to endoplasmic reticulum stress	biological_process	1	38	57	16890	0.120674	0.174922	7.79778	ERN2
GO:0009617	response to bacterium	biological_process	1	38	58	16890	0.122659	0.176988	7.66334	FER1L6
GO:0035264	multicellular organism growth	biological_process	1	38	60	16890	0.126616	0.181044	7.40789	IHH
GO:0001649	osteoblast differentiation	biological_process	1	38	63	16890	0.132519	0.188631	7.05514	IHH
GO:0065003	protein-containing complex assembly	biological_process	1	38	67	16890	0.140329	0.196213	6.63394	LOC102275331
GO:0006357	regulation of transcription by RNA polymerase II	biological_process	2	38	295	16890	0.142125	0.197848	3.01338	FOXA3;SPDEF
GO:0007267	cell-cell signaling	biological_process	1	38	70	16890	0.146142	0.201663	6.34962	IHH
GO:0035023	regulation of Rho protein signal transduction	biological_process	1	38	70	16890	0.146142	0.201663	6.34962	ARHGEF38
GO:0006338	chromatin remodeling	biological_process	1	38	72	16890	0.149996	0.206081	6.17325	LOC102275331
GO:0006811	ion transport	biological_process	1	38	73	16890	0.151916	0.207816	6.08868	SLC9A4
GO:0007596	blood coagulation	biological_process	1	38	75	16890	0.155745	0.212135	5.92632	ZFPM1
GO:0007050	cell cycle arrest	biological_process	1	38	76	16890	0.157653	0.213812	5.84834	ERN2
GO:0006629	lipid metabolic process	biological_process	1	38	78	16890	0.161456	0.218035	5.69838	PTPRN2
GO:0042127	regulation of cell proliferation	biological_process	1	38	79	16890	0.163351	0.218725	5.62625	LOC102275331
GO:0007417	central nervous system development	biological_process	1	38	80	16890	0.165243	0.219398	5.55592	LOC102275331
GO:0009952	anterior/posterior pattern specification	biological_process	1	38	80	16890	0.165243	0.219398	5.55592	HNF1B
GO:0090090	negative regulation of canonical Wnt signaling pathway	biological_process	1	38	81	16890	0.16713	0.220975	5.48733	LOC102275331
GO:0006355	regulation of transcription, DNA-templated	biological_process	2	38	332	16890	0.17126	0.223629	2.67755	ESRRG;LOC102269331
GO:0008284	positive regulation of cell proliferation	biological_process	2	38	332	16890	0.17126	0.223629	2.67755	CCKBR;LOC102275331
GO:0007204	positive regulation of cytosolic calcium ion concentration	biological_process	1	38	85	16890	0.174636	0.226168	5.2291	CCKBR
GO:0007219	Notch signaling pathway	biological_process	1	38	85	16890	0.174636	0.226168	5.2291	HNF1B
GO:0001934	positive regulation of protein phosphorylation	biological_process	1	38	88	16890	0.180223	0.229639	5.05084	LOC102275331
GO:0098609	cell-cell adhesion	biological_process	1	38	88	16890	0.180223	0.229639	5.05084	IGSF5
GO:0042981	regulation of apoptotic process	biological_process	1	38	93	16890	0.189452	0.24043	4.77929	LOC102275331
GO:0034765	regulation of ion transmembrane transport	biological_process	1	38	112	16890	0.22361	0.276019	3.96852	KCNJ16
GO:0008360	regulation of cell shape	biological_process	1	38	114	16890	0.227123	0.279265	3.89889	HPN
GO:0006334	nucleosome assembly	biological_process	1	38	119	16890	0.235838	0.286634	3.73507	LOC102275331
GO:0030036	actin cytoskeleton organization	biological_process	1	38	119	16890	0.235838	0.286634	3.73507	ITPKA
GO:0001701	in utero embryonic development	biological_process	1	38	124	16890	0.244457	0.293721	3.58447	IHH
GO:0016192	vesicle-mediated transport	biological_process	1	38	125	16890	0.24617	0.294658	3.55579	GOLT1A
GO:0043312	neutrophil degranulation	biological_process	1	38	129	16890	0.252982	0.301669	3.44553	CRACR2A
GO:0043161	proteasome-mediated ubiquitin-dependent protein catabolic process	biological_process	1	38	140	16890	0.271407	0.317409	3.17481	RNF186
GO:0007165	signal transduction	biological_process	2	38	454	16890	0.272209	0.317409	1.95803	ITPKA;LOC102275331
GO:0002250	adaptive immune response	biological_process	1	38	148	16890	0.284529	0.330556	3.0032	CRACR2A
GO:0030154	cell differentiation	biological_process	2	38	485	16890	0.298232	0.342695	1.83288	FOXA3;SPDEF
GO:0006397	mRNA processing	biological_process	1	38	179	16890	0.333236	0.376081	2.48309	ERN2
GO:0010628	positive regulation of gene expression	biological_process	1	38	181	16890	0.336265	0.378149	2.45566	HPN
GO:0043065	positive regulation of apoptotic process	biological_process	1	38	186	16890	0.343779	0.383866	2.38964	SPDEF
GO:0006508	proteolysis	biological_process	1	38	191	16890	0.35121	0.389412	2.32709	HPN
GO:0006468	protein phosphorylation	biological_process	1	38	277	16890	0.466913	0.498461	1.6046	ERN2
GO:0015031	protein transport	biological_process	1	38	311	16890	0.506883	0.532143	1.42918	GOLT1A
GO:0007275	multicellular organism development	biological_process	1	38	376	16890	0.575334	0.598044	1.18211	SPDEF
GO:0016021	integral component of membrane	cellular_component	18	38	3377	16890	0.000133098	0.01348	2.36912	FER1L6;ERN2;RNF186;ADAM28;SLC9A4;SLC9A1;VSIG1;PTPRN2;CLDN18;SMIM6;GOLT1A;IGSF5;GAL3ST1;DPCR1;CPD;CCKBR;GJB1;HPN
GO:0016323	basolateral plasma membrane	cellular_component	4	38	144	16890	0.000298608	0.01348	12.3465	KCNJ16;SLC9A4;VSIG1;KCNQ1
GO:0005886	plasma membrane	cellular_component	14	38	2992	16890	0.0039689	0.0575942	2.07976	IHH;ADAM28;KCNJ16;SLC9A4;SLC9A1;VSIG1;CLDN18;VEPH1;DPCR1;CPD;CCKBR;GJB1;KCNQ1;HPN
GO:0017053	transcriptional repressor complex	cellular_component	2	38	45	16890	0.00459097	0.0604477	19.7544	PRDM16;ZFPM1
GO:0008076	voltage-gated potassium channel complex	cellular_component	2	38	69	16890	0.0105168	0.0741977	12.8833	KCNJ16;KCNQ1
GO:0034702	ion channel complex	cellular_component	1	38	7	16890	0.0156458	0.0772513	63.4962	KCNQ1
GO:0016324	apical plasma membrane	cellular_component	3	38	237	16890	0.0160354	0.0773178	5.62625	SLC9A4;IGSF5;HPN
GO:0000137	Golgi cis cisterna	cellular_component	1	38	9	16890	0.0200721	0.0773609	49.386	GOLT1A
GO:0005923	bicellular tight junction	cellular_component	2	38	107	16890	0.0241002	0.0805767	8.30792	CLDN18;IGSF5
GO:0035580	specific granule lumen	cellular_component	1	38	17	16890	0.0375842	0.0906612	26.1455	CRACR2A
GO:0005922	connexin complex	cellular_component	1	38	20	16890	0.0440724	0.0987722	22.2237	GJB1
GO:0005667	transcription factor complex	cellular_component	2	38	153	16890	0.0463403	0.10099	5.81011	HNF1B;ZFPM1
GO:0016235	aggresome	cellular_component	1	38	31	16890	0.0675	0.124012	14.3379	PRDM16
GO:0030667	secretory granule membrane	cellular_component	1	38	42	16890	0.0903682	0.142071	10.5827	PTPRN2
GO:0030672	synaptic vesicle membrane	cellular_component	1	38	60	16890	0.126616	0.181044	7.40789	PTPRN2
GO:0009986	cell surface	cellular_component	2	38	385	16890	0.214524	0.268238	2.30895	IGSF5;HPN
GO:0005770	late endosome	cellular_component	1	38	107	16890	0.21476	0.268238	4.15396	KCNQ1
GO:0043197	dendritic spine	cellular_component	1	38	107	16890	0.21476	0.268238	4.15396	ITPKA
GO:0005789	endoplasmic reticulum membrane	cellular_component	3	38	717	16890	0.217667	0.270798	1.85972	RNF186;SLC9A1;HPN
GO:0005783	endoplasmic reticulum	cellular_component	3	38	722	16890	0.220633	0.273411	1.84684	SLC9A1;GOLT1A;KCNQ1
GO:0030659	cytoplasmic vesicle membrane	cellular_component	1	38	117	16890	0.232364	0.284601	3.79892	KCNQ1
GO:0005911	cell-cell junction	cellular_component	1	38	123	16890	0.242741	0.292772	3.61361	HPN
GO:0005635	nuclear envelope	cellular_component	1	38	134	16890	0.261413	0.31055	3.31697	GOLT1A
GO:0000139	Golgi membrane	cellular_component	2	38	444	16890	0.26381	0.312178	2.00213	GOLT1A;GAL3ST1
GO:0005802	trans-Golgi network	cellular_component	1	38	139	16890	0.269751	0.316882	3.19765	GOLT1A
GO:0015629	actin cytoskeleton	cellular_component	1	38	153	16890	0.292613	0.337466	2.90506	FOXA3
GO:0045121	membrane raft	cellular_component	1	38	161	16890	0.305362	0.348356	2.76071	KCNQ1
GO:0031012	extracellular matrix	cellular_component	1	38	190	16890	0.349731	0.389137	2.33934	IHH
GO:0005764	lysosome	cellular_component	1	38	204	16890	0.37015	0.407552	2.17879	KCNQ1
GO:0005769	early endosome	cellular_component	1	38	208	16890	0.375869	0.412411	2.13689	KCNQ1
GO:0005759	mitochondrial matrix	cellular_component	1	38	226	16890	0.400982	0.436933	1.9667	ACSM3
GO:0005615	extracellular space	cellular_component	3	38	1056	16890	0.427215	0.460751	1.26271	IHH;HABP2;CPD
GO:0070062	extracellular exosome	cellular_component	2	38	657	16890	0.438198	0.470988	1.35304	CPD;HPN
GO:0043025	neuronal cell body	cellular_component	1	38	266	16890	0.453319	0.485589	1.67095	HPN
GO:0005743	mitochondrial inner membrane	cellular_component	1	38	302	16890	0.496596	0.52483	1.47177	CHDH
GO:0032991	protein-containing complex	cellular_component	1	38	351	16890	0.550178	0.575683	1.26631	LOC102275331
GO:0005654	nucleoplasm	cellular_component	4	38	1894	16890	0.629788	0.648251	0.938698	PRDM16;HNF1B;FOXA3;ZFPM1
GO:0030054	cell junction	cellular_component	1	38	477	16890	0.663729	0.678764	0.931811	PTPRN2
GO:0005576	extracellular region	cellular_component	2	38	1024	16890	0.679722	0.692878	0.868113	CRACR2A;ADAM28
GO:0016020	membrane	cellular_component	2	38	1116	16890	0.725734	0.737401	0.796548	CRACR2A;CPD
GO:0005634	nucleus	cellular_component	8	38	4220	16890	0.768331	0.778181	0.842604	PRDM16;HNF1B;FOXA3;ESRRG;LOC102269331;ZFPM1;SPDEF;LOC102275331
GO:0005737	cytoplasm	cellular_component	7	38	3784	16890	0.779237	0.786705	0.822229	CRACR2A;ARHGEF38;SLC9A1;TRIM50;DPCR1;GJB1;KCNQ1
GO:0005739	mitochondrion	cellular_component	1	38	893	16890	0.873373	0.878936	0.497731	ADAM28
GO:0005887	integral component of plasma membrane	cellular_component	1	38	933	16890	0.884877	0.887686	0.476392	HPN
GO:0005829	cytosol	cellular_component	2	38	3227	16890	0.996863	0.996863	0.275472	PRDM16;ITPKA
GO:0003708	retinoic acid receptor activity	molecular_function	2	38	6	16890	7.35145e-05	0.01348	148.158	ESRRG;LOC102269331
GO:0015386	potassium:proton antiporter activity	molecular_function	2	38	11	16890	0.000267645	0.01348	80.8134	SLC9A4;SLC9A1
GO:0015385	sodium:proton antiporter activity	molecular_function	2	38	15	16890	0.000508064	0.0145953	59.2632	SLC9A4;SLC9A1
GO:0005496	steroid binding	molecular_function	2	38	24	16890	0.00131854	0.0260411	37.0395	ESRRG;LOC102269331
GO:0001228	DNA-binding transcription activator activity, RNA polymerase II-specific	molecular_function	3	38	103	16890	0.00159117	0.0279339	12.9458	ESRRG;LOC102269331;LOC102275331
GO:0003707	steroid hormone receptor activity	molecular_function	2	38	44	16890	0.00439313	0.0603578	20.2033	ESRRG;LOC102269331
GO:0003705	transcription factor activity, RNA polymerase II distal enhancer sequence-specific binding	molecular_function	2	38	47	16890	0.00499881	0.063185	18.9138	HNF1B;LOC102275331
GO:0005516	calmodulin binding	molecular_function	3	38	171	16890	0.00663313	0.0741977	7.79778	ITPKA;SLC9A1;KCNQ1
GO:0008233	peptidase activity	molecular_function	2	38	55	16890	0.00678983	0.0741977	16.1627	IHH;HPN
GO:0015645	fatty acid ligase activity	molecular_function	1	38	5	16890	0.0112001	0.0741977	88.8947	ACSM3
GO:0005243	gap junction channel activity	molecular_function	1	38	6	16890	0.0134254	0.0741977	74.0789	GJB1
GO:0047760	butyrate-CoA ligase activity	molecular_function	1	38	6	16890	0.0134254	0.0741977	74.0789	ACSM3
GO:0001227	DNA-binding transcription repressor activity, RNA polymerase II-specific	molecular_function	2	38	79	16890	0.0136186	0.0741977	11.2525	ZFPM1;SPDEF
GO:0015467	G-protein activated inward rectifier potassium channel activity	molecular_function	1	38	8	16890	0.0178614	0.0773178	55.5592	KCNJ16
GO:0035326	enhancer binding	molecular_function	1	38	8	16890	0.0178614	0.0773178	55.5592	LOC102275331
GO:0034236	protein kinase A catalytic subunit binding	molecular_function	1	38	9	16890	0.0200721	0.0773609	49.386	KCNQ1
GO:0015269	calcium-activated potassium channel activity	molecular_function	1	38	10	16890	0.022278	0.0773609	44.4474	HPN
GO:0015271	outward rectifier potassium channel activity	molecular_function	1	38	11	16890	0.024479	0.0805767	40.4067	KCNQ1
GO:0008157	protein phosphatase 1 binding	molecular_function	1	38	14	16890	0.0310532	0.0864271	31.7481	KCNQ1
GO:0005242	inward rectifier potassium channel activity	molecular_function	1	38	17	16890	0.0375842	0.0906612	26.1455	KCNJ16
GO:0034237	protein kinase A regulatory subunit binding	molecular_function	1	38	18	16890	0.0397517	0.0944477	24.693	KCNQ1
GO:0001158	enhancer sequence-specific DNA binding	molecular_function	1	38	20	16890	0.0440724	0.0987722	22.2237	LOC102275331
GO:0004540	ribonuclease activity	molecular_function	1	38	20	16890	0.0440724	0.0987722	22.2237	ERN2
GO:0004683	calmodulin-dependent protein kinase activity	molecular_function	1	38	20	16890	0.0440724	0.0987722	22.2237	ITPKA
GO:0044212	transcription regulatory region DNA binding	molecular_function	2	38	150	16890	0.0447214	0.0995209	5.92632	HNF1B;FOXA3
GO:0043565	sequence-specific DNA binding	molecular_function	3	38	361	16890	0.0471077	0.101266	3.69369	PRDM16;FOXA3;SPDEF
GO:0004252	serine-type endopeptidase activity	molecular_function	2	38	160	16890	0.0502008	0.10572	5.55592	HABP2;HPN
GO:0033613	activating transcription factor binding	molecular_function	1	38	23	16890	0.050518	0.10572	19.3249	PRDM16
GO:0001102	RNA polymerase II activating transcription factor binding	molecular_function	1	38	26	16890	0.0569212	0.113127	17.0951	ZFPM1
GO:0004181	metallocarboxypeptidase activity	molecular_function	1	38	26	16890	0.0569212	0.113127	17.0951	CPD
GO:0005251	delayed rectifier potassium channel activity	molecular_function	1	38	27	16890	0.0590463	0.115177	16.462	KCNQ1
GO:0001085	RNA polymerase II transcription factor binding	molecular_function	1	38	31	16890	0.0675	0.124012	14.3379	ZFPM1
GO:0008236	serine-type peptidase activity	molecular_function	1	38	31	16890	0.0675	0.124012	14.3379	HPN
GO:0000977	RNA polymerase II regulatory region sequence-specific DNA binding	molecular_function	2	38	192	16890	0.0692225	0.124788	4.62993	ESRRG;LOC102269331
GO:0008270	zinc ion binding	molecular_function	4	38	700	16890	0.0710719	0.125872	2.53985	ESRRG;LOC102269331;TRIM50;CPD
GO:0004519	endonuclease activity	molecular_function	1	38	33	16890	0.0716991	0.125872	13.4689	ERN2
GO:0097110	scaffold protein binding	molecular_function	1	38	37	16890	0.0800421	0.134539	12.0128	KCNQ1
GO:0048365	Rac GTPase binding	molecular_function	1	38	38	16890	0.0821164	0.136573	11.6967	ITPKA
GO:0046332	SMAD binding	molecular_function	1	38	39	16890	0.0841862	0.138556	11.3968	PRDM16
GO:0048306	calcium-dependent protein binding	molecular_function	1	38	40	16890	0.0862514	0.140492	11.1118	SLC9A1
GO:0008134	transcription factor binding	molecular_function	2	38	233	16890	0.0964253	0.149365	3.81522	FOXA3;ZFPM1
GO:0005546	phosphatidylinositol-4,5-bisphosphate binding	molecular_function	1	38	51	16890	0.108672	0.163525	8.71517	KCNQ1
GO:0005249	voltage-gated potassium channel activity	molecular_function	1	38	56	16890	0.118685	0.173631	7.93703	KCNQ1
GO:0050660	flavin adenine dinucleotide binding	molecular_function	1	38	57	16890	0.120674	0.174922	7.79778	CHDH
GO:0008237	metallopeptidase activity	molecular_function	1	38	65	16890	0.136433	0.193331	6.83806	ADAM28
GO:0005089	Rho guanyl-nucleotide exchange factor activity	molecular_function	1	38	66	16890	0.138383	0.194351	6.73445	ARHGEF38
GO:0016740	transferase activity	molecular_function	1	38	66	16890	0.138383	0.194351	6.73445	TRIM50
GO:0000978	RNA polymerase II proximal promoter sequence-specific DNA binding	molecular_function	2	38	322	16890	0.16328	0.218725	2.76071	ZFPM1;LOC102275331
GO:0004725	protein tyrosine phosphatase activity	molecular_function	1	38	82	16890	0.169012	0.222533	5.42041	PTPRN2
GO:0044325	ion channel binding	molecular_function	1	38	87	16890	0.178365	0.229639	5.10889	KCNQ1
GO:0005509	calcium ion binding	molecular_function	3	38	650	16890	0.178933	0.229639	2.05142	IHH;HABP2;CRACR2A
GO:0004222	metalloendopeptidase activity	molecular_function	1	38	105	16890	0.211192	0.266947	4.23308	ADAM28
GO:0001078	proximal promoter DNA-binding transcription repressor activity, RNA polymerase II-specific	molecular_function	1	38	122	16890	0.241021	0.291811	3.64323	ZFPM1
GO:0004672	protein kinase activity	molecular_function	1	38	136	16890	0.264759	0.312178	3.26819	LOC102275331
GO:0000981	DNA-binding transcription factor activity, RNA polymerase II-specific	molecular_function	3	38	839	16890	0.292045	0.337466	1.5893	FOXA3;ZFPM1;SPDEF
GO:0061630	ubiquitin protein ligase activity	molecular_function	1	38	160	16890	0.303781	0.347807	2.77796	RNF186
GO:0019904	protein domain specific binding	molecular_function	1	38	164	16890	0.310085	0.352471	2.71021	FOXA3
GO:0005198	structural molecule activity	molecular_function	1	38	170	16890	0.319438	0.361801	2.61455	CLDN18
GO:0003713	transcription coactivator activity	molecular_function	1	38	182	16890	0.337775	0.378499	2.44216	PRDM16
GO:0000287	magnesium ion binding	molecular_function	1	38	197	16890	0.36002	0.397784	2.25621	ERN2
GO:0001077	proximal promoter DNA-binding transcription activator activity, RNA polymerase II-specific	molecular_function	1	38	210	16890	0.378709	0.41409	2.11654	LOC102275331
GO:0004842	ubiquitin-protein transferase activity	molecular_function	1	38	229	16890	0.405071	0.439269	1.94093	RNF186
GO:0042803	protein homodimerization activity	molecular_function	2	38	616	16890	0.405907	0.439269	1.4431	HNF1B;GJB1
GO:0046872	metal ion binding	molecular_function	5	38	2001	16890	0.474313	0.504657	1.11063	RNF186;PRDM16;ADAM28;ACSM3;ZFPM1
GO:0003682	chromatin binding	molecular_function	1	38	296	16890	0.489622	0.519197	1.5016	LOC102275331
GO:0004674	protein serine/threonine kinase activity	molecular_function	1	38	307	16890	0.502336	0.529128	1.4478	ERN2
GO:0005524	ATP binding	molecular_function	3	38	1293	16890	0.564726	0.588955	1.03126	ERN2;ITPKA;ACSM3
GO:0005525	GTP binding	molecular_function	1	38	386	16890	0.585008	0.606106	1.15149	GIMD1
GO:0046982	protein heterodimerization activity	molecular_function	1	38	401	16890	0.599117	0.618696	1.10841	HNF1B
GO:0003700	DNA-binding transcription factor activity	molecular_function	1	38	471	16890	0.65902	0.676138	0.943681	HNF1B
