# Supplementary material for: Transcriptome profiling in rumen, reticulum, omasum, and abomasum tissues during the developmental transition of pre-ruminant to the ruminant in yaks
Source: Frontiers journal article supplement (doi:10.3389/fvets.2023.1204706), 2023-09-22
Supplement: Data_Sheet_1.zip [file Table S20-The GO enrichment in blue module of WGCNA.xlsx]

## Sheet:  Table S20
id	Term	Category	ListHits	ListTotal	PopHits	PopTotal	p-value	q-value	Enrichment_score	geneID
GO:0010466	negative regulation of peptidase activity	biological_process	3	46	5	16890	1.88344e-07	2.97387e-05	220.304	LOC102270717;LOC102283923;LOC102267682
GO:0010951	negative regulation of endopeptidase activity	biological_process	5	46	57	16890	4.51262e-07	2.97387e-05	32.2082	LOC102270717;LOC102283923;LOC102270133;LOC102267568;LOC102267682
GO:0030162	regulation of proteolysis	biological_process	3	46	10	16890	2.23863e-06	0.000105663	110.152	LOC102270717;LOC102283923;LOC102267568
GO:0031069	hair follicle morphogenesis	biological_process	3	46	15	16890	8.40746e-06	0.000330693	73.4348	TMEM79;LOC102282154;LOC102268548
GO:0032689	negative regulation of interferon-gamma production	biological_process	3	46	16	16890	1.03279e-05	0.000348198	68.8451	IL20RB;PGLYRP3;PGLYRP4
GO:0009253	peptidoglycan catabolic process	biological_process	2	46	6	16890	0.000108096	0.00255106	122.391	PGLYRP3;PGLYRP4
GO:0016045	detection of bacterium	biological_process	2	46	6	16890	0.000108096	0.00255106	122.391	PGLYRP3;PGLYRP4
GO:0019730	antimicrobial humoral response	biological_process	2	46	10	16890	0.000322042	0.00618201	73.4348	PGLYRP3;PGLYRP4
GO:0031640	killing of cells of other organism	biological_process	2	46	12	16890	0.000470692	0.00653431	61.1957	PGLYRP3;PGLYRP4
GO:0061844	antimicrobial humoral immune response mediated by antimicrobial peptide	biological_process	2	46	39	16890	0.00504322	0.0517478	18.8294	PGLYRP3;PGLYRP4
GO:0070268	cornification	biological_process	2	46	40	16890	0.00529949	0.0521117	18.3587	TMEM79;KRT6A
GO:0007156	homophilic cell adhesion via plasma membrane adhesion molecules	biological_process	3	46	144	16890	0.00704821	0.0643974	7.64946	LOC102265723;DSG3;LOC102266197
GO:0033007	negative regulation of mast cell activation involved in immune response	biological_process	1	46	5	16890	0.0135451	0.0890903	73.4348	ENPP3
GO:0052548	regulation of endopeptidase activity	biological_process	1	46	5	16890	0.0135451	0.0890903	73.4348	A2ML1
GO:0086009	membrane repolarization	biological_process	1	46	5	16890	0.0135451	0.0890903	73.4348	ATP1B3
GO:1903288	positive regulation of potassium ion import	biological_process	1	46	5	16890	0.0135451	0.0890903	73.4348	ATP1B3
GO:0050830	defense response to Gram-positive bacterium	biological_process	2	46	66	16890	0.0139352	0.0890903	11.1265	PGLYRP3;PGLYRP4
GO:0002437	inflammatory response to antigenic stimulus	biological_process	1	46	6	16890	0.0162326	0.0890903	61.1957	IL20RB
GO:0009143	nucleoside triphosphate catabolic process	biological_process	1	46	6	16890	0.0162326	0.0890903	61.1957	ENPP3
GO:0010950	positive regulation of endopeptidase activity	biological_process	1	46	6	16890	0.0162326	0.0890903	61.1957	LOC102267682
GO:0035865	cellular response to potassium ion	biological_process	1	46	6	16890	0.0162326	0.0890903	61.1957	DLG2
GO:0045616	regulation of keratinocyte differentiation	biological_process	1	46	7	16890	0.0189128	0.092988	52.4534	LOC102267568
GO:0099645	neurotransmitter receptor localization to postsynaptic specialization membrane	biological_process	1	46	7	16890	0.0189128	0.092988	52.4534	DLG2
GO:0099641	anterograde axonal protein transport	biological_process	1	46	8	16890	0.0215859	0.101885	45.8967	DLG2
GO:0098609	cell-cell adhesion	biological_process	2	46	88	16890	0.0239478	0.10599	8.34486	DLG2;PKP1
GO:0035722	interleukin-12-mediated signaling pathway	biological_process	1	46	9	16890	0.0242519	0.10599	40.7971	LOC102270133
GO:0097120	receptor localization to synapse	biological_process	1	46	9	16890	0.0242519	0.10599	40.7971	DLG2
GO:0036376	sodium ion export across plasma membrane	biological_process	1	46	10	16890	0.0269108	0.107335	36.7174	ATP1B3
GO:1900181	negative regulation of protein localization to nucleus	biological_process	1	46	10	16890	0.0269108	0.107335	36.7174	TRIM29
GO:0030007	cellular potassium ion homeostasis	biological_process	1	46	11	16890	0.0295625	0.107335	33.3794	ATP1B3
GO:0032703	negative regulation of interleukin-2 production	biological_process	1	46	11	16890	0.0295625	0.107335	33.3794	IL20RB
GO:0043508	negative regulation of JUN kinase activity	biological_process	1	46	11	16890	0.0295625	0.107335	33.3794	LOC102267682
GO:0045861	negative regulation of proteolysis	biological_process	1	46	11	16890	0.0295625	0.107335	33.3794	LOC102267682
GO:0061436	establishment of skin barrier	biological_process	1	46	11	16890	0.0295625	0.107335	33.3794	TMEM79
GO:0006883	cellular sodium ion homeostasis	biological_process	1	46	12	16890	0.0322073	0.110158	30.5978	ATP1B3
GO:0007492	endoderm development	biological_process	1	46	12	16890	0.0322073	0.110158	30.5978	PAX9
GO:0042476	odontogenesis	biological_process	1	46	12	16890	0.0322073	0.110158	30.5978	PAX9
GO:0042730	fibrinolysis	biological_process	1	46	12	16890	0.0322073	0.110158	30.5978	LOC102270133
GO:0045055	regulated exocytosis	biological_process	1	46	13	16890	0.0348449	0.115823	28.2441	TMEM79
GO:0007194	negative regulation of adenylate cyclase activity	biological_process	1	46	14	16890	0.0374755	0.118176	26.2267	GPR87
GO:0032733	positive regulation of interleukin-10 production	biological_process	1	46	14	16890	0.0374755	0.118176	26.2267	IL20RB
GO:0043086	negative regulation of catalytic activity	biological_process	1	46	14	16890	0.0374755	0.118176	26.2267	LOC102267682
GO:0032753	positive regulation of interleukin-4 production	biological_process	1	46	15	16890	0.0400992	0.123672	24.4783	IL20RB
GO:0046847	filopodium assembly	biological_process	1	46	16	16890	0.0427158	0.127607	22.9484	ARHGEF4
GO:0007585	respiratory gaseous exchange	biological_process	1	46	17	16890	0.0453254	0.132059	21.5985	TMPRSS11D
GO:0045197	establishment or maintenance of epithelial cell apical/basal polarity	biological_process	1	46	18	16890	0.0479281	0.137939	20.3986	DLG2
GO:0042130	negative regulation of T cell proliferation	biological_process	1	46	19	16890	0.0505238	0.140278	19.3249	IL20RB
GO:0043113	receptor clustering	biological_process	1	46	19	16890	0.0505238	0.140278	19.3249	DLG2
GO:0045104	intermediate filament cytoskeleton organization	biological_process	1	46	20	16890	0.0531127	0.142438	18.3587	KRT6A
GO:0045087	innate immune response	biological_process	3	46	316	16890	0.054593	0.144764	3.48583	PGLYRP3;PGLYRP4;TRIM29
GO:0048873	homeostasis of number of cells within a tissue	biological_process	1	46	21	16890	0.0556946	0.146044	17.4845	IL20RB
GO:0010718	positive regulation of epithelial to mesenchymal transition	biological_process	1	46	23	16890	0.0608377	0.149664	15.9641	LOC102267682
GO:0006821	chloride transport	biological_process	1	46	24	16890	0.063399	0.149664	15.2989	CLIC3
GO:0097190	apoptotic signaling pathway	biological_process	1	46	24	16890	0.063399	0.149664	15.2989	DAPL1
GO:0010507	negative regulation of autophagy	biological_process	1	46	25	16890	0.0659535	0.149664	14.687	DAPL1
GO:0046034	ATP metabolic process	biological_process	1	46	25	16890	0.0659535	0.149664	14.687	ENPP3
GO:0060325	face morphogenesis	biological_process	1	46	25	16890	0.0659535	0.149664	14.687	PAX9
GO:0071363	cellular response to growth factor stimulus	biological_process	1	46	25	16890	0.0659535	0.149664	14.687	PAX9
GO:0030032	lamellipodium assembly	biological_process	1	46	29	16890	0.0761034	0.171051	12.6612	ARHGEF4
GO:0009411	response to UV	biological_process	1	46	30	16890	0.078624	0.17505	12.2391	LOC102267568
GO:0007173	epidermal growth factor receptor signaling pathway	biological_process	1	46	31	16890	0.0811378	0.177278	11.8443	FAM83B
GO:0008277	regulation of G protein-coupled receptor signaling pathway	biological_process	1	46	31	16890	0.0811378	0.177278	11.8443	RGS12
GO:0010107	potassium ion import	biological_process	1	46	32	16890	0.0836449	0.177278	11.4742	ATP1B3
GO:0019233	sensory perception of pain	biological_process	1	46	33	16890	0.0861454	0.177278	11.1265	DLG2
GO:0007043	cell-cell junction assembly	biological_process	1	46	34	16890	0.0886391	0.177278	10.7992	PKP1
GO:0008544	epidermis development	biological_process	1	46	34	16890	0.0886391	0.177278	10.7992	ZNF750
GO:0034198	cellular response to amino acid starvation	biological_process	1	46	34	16890	0.0886391	0.177278	10.7992	DAPL1
GO:0043408	regulation of MAPK cascade	biological_process	1	46	34	16890	0.0886391	0.177278	10.7992	PAK6
GO:0031424	keratinization	biological_process	1	46	41	16890	0.10591	0.202576	8.95546	KRT6A
GO:0007612	learning	biological_process	1	46	44	16890	0.113213	0.206369	8.34486	PAK6
GO:0042060	wound healing	biological_process	1	46	44	16890	0.113213	0.206369	8.34486	LOC102270133
GO:0031098	stress-activated protein kinase signaling cascade	biological_process	1	46	45	16890	0.115635	0.206369	8.15942	PAK6
GO:0007186	G protein-coupled receptor signaling pathway	biological_process	3	46	437	16890	0.115826	0.206369	2.52064	GPR87;ADGRF4;ARHGEF4
GO:0007565	female pregnancy	biological_process	1	46	46	16890	0.11805	0.206369	7.98204	ENDOU
GO:0023014	signal transduction by protein phosphorylation	biological_process	1	46	46	16890	0.11805	0.206369	7.98204	PAK6
GO:0050728	negative regulation of inflammatory response	biological_process	1	46	46	16890	0.11805	0.206369	7.98204	ENPP3
GO:0010923	negative regulation of phosphatase activity	biological_process	1	46	50	16890	0.127646	0.221503	7.34348	DLG2
GO:0032147	activation of protein kinase activity	biological_process	1	46	54	16890	0.137139	0.234528	6.79952	PAK6
GO:0007613	memory	biological_process	1	46	57	16890	0.144193	0.241344	6.44165	PAK6
GO:0007626	locomotory behavior	biological_process	1	46	57	16890	0.144193	0.241344	6.44165	PAK6
GO:0009887	animal organ morphogenesis	biological_process	1	46	60	16890	0.15119	0.247784	6.11957	PAX9
GO:0009968	negative regulation of signal transduction	biological_process	1	46	65	16890	0.162728	0.264854	5.64883	RGS12
GO:0007267	cell-cell signaling	biological_process	1	46	70	16890	0.174113	0.272123	5.24534	GJB2
GO:0035023	regulation of Rho protein signal transduction	biological_process	1	46	70	16890	0.174113	0.272123	5.24534	ARHGEF4
GO:0051056	regulation of small GTPase mediated signal transduction	biological_process	1	46	79	16890	0.194225	0.298259	4.64777	ARHGEF4
GO:0034220	ion transmembrane transport	biological_process	1	46	95	16890	0.228802	0.346137	3.86499	CLCA2
GO:0019221	cytokine-mediated signaling pathway	biological_process	1	46	101	16890	0.241391	0.358291	3.63539	IL20RB
GO:0006897	endocytosis	biological_process	1	46	109	16890	0.257864	0.368953	3.36857	2022-03-03
GO:0045892	negative regulation of transcription, DNA-templated	biological_process	2	46	361	16890	0.257954	0.368953	2.0342	PAX9;LOC102268572
GO:0007605	sensory perception of sound	biological_process	1	46	110	16890	0.259898	0.369494	3.33794	GJB2
GO:0034765	regulation of ion transmembrane transport	biological_process	1	46	112	16890	0.263951	0.370788	3.27834	CLIC3
GO:0050821	protein stabilization	biological_process	1	46	115	16890	0.269989	0.377025	3.19282	ATP1B3
GO:0072659	protein localization to plasma membrane	biological_process	1	46	119	16890	0.277964	0.383622	3.0855	ATP1B3
GO:0043312	neutrophil degranulation	biological_process	1	46	129	16890	0.29753	0.402566	2.84631	LOC102267682
GO:0007166	cell surface receptor signaling pathway	biological_process	1	46	139	16890	0.316578	0.424503	2.64154	ADGRF4
GO:0007165	signal transduction	biological_process	2	46	454	16890	0.351763	0.455454	1.61751	RGS12;CLIC3
GO:0030335	positive regulation of cell migration	biological_process	1	46	159	16890	0.35317	0.455454	2.30927	LOC102267682
GO:0051260	protein homooligomerization	biological_process	1	46	162	16890	0.358491	0.456646	2.26651	LOC102268572
GO:0007268	chemical synaptic transmission	biological_process	1	46	164	16890	0.362014	0.456646	2.23887	DLG2
GO:0030154	cell differentiation	biological_process	2	46	485	16890	0.382346	0.474913	1.51412	DAPL1;ZNF750
GO:0043065	positive regulation of apoptotic process	biological_process	1	46	186	16890	0.399544	0.490447	1.97405	ARHGEF4
GO:0006508	proteolysis	biological_process	1	46	191	16890	0.407767	0.490447	1.92238	TMPRSS11D
GO:0008283	cell proliferation	biological_process	1	46	200	16890	0.422292	0.500809	1.83587	FAM83B
GO:0006955	immune response	biological_process	1	46	230	16890	0.468237	0.538844	1.59641	ENDOU
GO:0008285	negative regulation of cell proliferation	biological_process	1	46	242	16890	0.485597	0.548329	1.51725	BNIPL
GO:0016567	protein ubiquitination	biological_process	1	46	282	16890	0.539552	0.600633	1.30204	2022-03-03
GO:0035556	intracellular signal transduction	biological_process	1	46	306	16890	0.569224	0.617816	1.19991	ARHGEF4
GO:0045944	positive regulation of transcription by RNA polymerase II	biological_process	2	46	696	16890	0.570695	0.617816	1.0551	PAX9;ZNF750
GO:0006355	regulation of transcription, DNA-templated	biological_process	1	46	332	16890	0.599259	0.63705	1.10595	PAX9
GO:0008284	positive regulation of cell proliferation	biological_process	1	46	332	16890	0.599259	0.63705	1.10595	LOC102267682
GO:0043066	negative regulation of apoptotic process	biological_process	1	46	340	16890	0.608081	0.64353	1.07992	LOC102270133
GO:0007155	cell adhesion	biological_process	1	46	361	16890	0.630345	0.664114	1.0171	CLCA2
GO:0006915	apoptotic process	biological_process	1	46	385	16890	0.654277	0.683227	0.953698	BNIPL
GO:0000122	negative regulation of transcription by RNA polymerase II	biological_process	1	46	503	16890	0.751577	0.772612	0.729968	TRIM29
GO:0030057	desmosome	cellular_component	4	46	24	16890	4.91589e-07	2.97387e-05	61.1957	LOC102265723;DSG3;LOC102266197;PKP1
GO:0005576	extracellular region	cellular_component	10	46	1024	16890	0.000353594	0.00618201	3.58568	ENPP3;ENDOU;LOC102286772;LOC102276824;PGLYRP3;TMPRSS11D;CLCA2;LOC102270133;LOC102267682;LOC102273066
GO:0005882	intermediate filament	cellular_component	3	46	63	16890	0.000669624	0.00877951	17.4845	KRT6A;LOC102282154;LOC102268548
GO:0005615	extracellular space	cellular_component	8	46	1056	16890	0.00709462	0.0643974	2.78162	A2ML1;PGLYRP3;LOC102270717;LOC102283923;LOC102270133;LOC102267568;LOC102267682;PGLYRP4
GO:0070062	extracellular exosome	cellular_component	6	46	657	16890	0.00843716	0.073747	3.35319	A2ML1;TMPRSS11D;LOC102267568;LOC102267682;KRT6A;CLIC3
GO:0045095	keratin filament	cellular_component	2	46	53	16890	0.00915482	0.076501	13.8556	KRT5;KRT6A
GO:0005890	sodium:potassium-exchanging ATPase complex	cellular_component	1	46	10	16890	0.0269108	0.107335	36.7174	ATP1B3
GO:0044224	juxtaparanode region of axon	cellular_component	1	46	10	16890	0.0269108	0.107335	36.7174	DLG2
GO:0005622	intracellular	cellular_component	4	46	425	16890	0.0281005	0.107335	3.45575	PGLYRP3;LOC102270717;LOC102283923;PGLYRP4
GO:0005737	cytoplasm	cellular_component	16	46	3784	16890	0.0375558	0.118176	1.55253	ENDOU;BNIPL;ZNF185;LOC102270717;LOC102283923;LOC102270133;LOC102267568;LOC102267682;RGS12;FAM83B;PKP1;TRIM29;LOC102282154;LOC102268548;PAK6;CLIC3
GO:0030054	cell junction	cellular_component	4	46	477	16890	0.0403508	0.123672	3.07903	CLCA2;DLG2;RGS12;PAK6
GO:0035578	azurophil granule lumen	cellular_component	1	46	16	16890	0.0427158	0.127607	22.9484	LOC102267682
GO:0005922	connexin complex	cellular_component	1	46	20	16890	0.0531127	0.142438	18.3587	GJB2
GO:0072562	blood microparticle	cellular_component	1	46	22	16890	0.0582696	0.149474	16.6897	TMPRSS13
GO:0098839	postsynaptic density membrane	cellular_component	1	46	23	16890	0.0608377	0.149664	15.9641	DLG2
GO:0000794	condensed nuclear chromosome	cellular_component	1	46	25	16890	0.0659535	0.149664	14.687	RGS12
GO:0009925	basal plasma membrane	cellular_component	1	46	32	16890	0.0836449	0.177278	11.4742	CLCA2
GO:0043202	lysosomal lumen	cellular_component	1	46	34	16890	0.0886391	0.177278	10.7992	LOC102267568
GO:0005764	lysosome	cellular_component	2	46	204	16890	0.106438	0.202576	3.59974	MARCH3;TRIM29
GO:0034707	chloride channel complex	cellular_component	1	46	44	16890	0.113213	0.206369	8.34486	CLIC3
GO:1904115	axon cytoplasm	cellular_component	1	46	44	16890	0.113213	0.206369	8.34486	DLG2
GO:0032588	trans-Golgi network membrane	cellular_component	1	46	53	16890	0.134775	0.232168	6.92781	TMEM79
GO:0031594	neuromuscular junction	cellular_component	1	46	58	16890	0.146532	0.243531	6.33058	DLG2
GO:0005913	cell-cell adherens junction	cellular_component	1	46	68	16890	0.169577	0.268592	5.39962	PKP1
GO:0032587	ruffle membrane	cellular_component	1	46	68	16890	0.169577	0.268592	5.39962	ARHGEF4
GO:0031982	vesicle	cellular_component	1	46	73	16890	0.180871	0.280825	5.02978	LOC102267682
GO:0016021	integral component of membrane	cellular_component	12	46	3377	16890	0.194627	0.298259	1.30473	TMEM79;ENPP3;IL20RB;LOC102265723;TMPRSS13;GJB2;GPR87;DSG3;TMEM40;LOC102266197;ADGRF4;MARCH3
GO:0016363	nuclear matrix	cellular_component	1	46	85	16890	0.207365	0.315731	4.31969	RGS12
GO:0001650	fibrillar center	cellular_component	1	46	98	16890	0.235122	0.353432	3.74667	PAK6
GO:0042470	melanosome	cellular_component	1	46	99	16890	0.237217	0.354325	3.70883	ATP1B3
GO:0032991	protein-containing complex	cellular_component	2	46	351	16890	0.247823	0.361027	2.09216	PGLYRP3;PGLYRP4
GO:0031901	early endosome membrane	cellular_component	1	46	112	16890	0.263951	0.370788	3.27834	2022-03-03
GO:0030659	cytoplasmic vesicle membrane	cellular_component	1	46	117	16890	0.273987	0.380358	3.13824	2022-03-03
GO:0005911	cell-cell junction	cellular_component	1	46	123	16890	0.285854	0.392218	2.98515	PKP1
GO:0005886	plasma membrane	cellular_component	10	46	2992	16890	0.290387	0.396135	1.22719	IL20RB;LOC102276824;LOC102265723;GPR87;DSG3;CLCA2;LOC102270133;DLG2;LOC102266197;PKP1
GO:0016323	basolateral plasma membrane	cellular_component	1	46	144	16890	0.325912	0.432108	2.54982	DLG2
GO:0005667	transcription factor complex	cellular_component	1	46	153	16890	0.342399	0.448923	2.39983	PAX9
GO:0015629	actin cytoskeleton	cellular_component	1	46	153	16890	0.342399	0.448923	2.39983	ZNF185
GO:0016020	membrane	cellular_component	4	46	1116	16890	0.361814	0.456646	1.31604	PGLYRP3;DLG2;PGLYRP4;FAM83B
GO:0009897	external side of plasma membrane	cellular_component	1	46	185	16890	0.397886	0.490447	1.98472	ENPP3
GO:0005925	focal adhesion	cellular_component	1	46	189	16890	0.404491	0.490447	1.94272	ZNF185
GO:0005765	lysosomal membrane	cellular_component	1	46	192	16890	0.409398	0.490447	1.91236	TMEM79
GO:0016604	nuclear body	cellular_component	1	46	192	16890	0.409398	0.490447	1.91236	CLIC3
GO:0031965	nuclear membrane	cellular_component	1	46	194	16890	0.412648	0.491843	1.89265	CLCA2
GO:0005768	endosome	cellular_component	1	46	203	16890	0.427056	0.503926	1.80874	2022-03-03
GO:0014069	postsynaptic density	cellular_component	1	46	215	16890	0.44573	0.519967	1.70779	DLG2
GO:0031410	cytoplasmic vesicle	cellular_component	1	46	225	16890	0.460836	0.533124	1.63188	LOC102267682
GO:0005887	integral component of plasma membrane	cellular_component	3	46	933	16890	0.470743	0.538844	1.18062	LOC102276824;TMPRSS11D;CLCA2
GO:0016324	apical plasma membrane	cellular_component	1	46	237	16890	0.478432	0.542836	1.54926	ENPP3
GO:0043005	neuron projection	cellular_component	1	46	256	16890	0.50515	0.567692	1.43427	DLG2
GO:0045202	synapse	cellular_component	1	46	268	16890	0.521329	0.583098	1.37005	RGS12
GO:0098978	glutamatergic synapse	cellular_component	1	46	287	16890	0.545894	0.60484	1.27935	DLG2
GO:0016607	nuclear speck	cellular_component	1	46	304	16890	0.566825	0.617816	1.20781	LOC102267568
GO:0030425	dendrite	cellular_component	1	46	315	16890	0.579862	0.624874	1.16563	RGS12
GO:0005634	nucleus	cellular_component	10	46	4220	16890	0.746484	0.772612	0.87008	BNIPL;PAX9;CLCA2;ZNF750;LOC102268572;LOC102267682;RGS12;PKP1;PAK6;CLIC3
GO:0048471	perinuclear region of cytoplasm	cellular_component	1	46	505	16890	0.752969	0.772612	0.727077	ENPP3
GO:0005829	cytosol	cellular_component	7	46	3227	16890	0.802201	0.819565	0.796473	BNIPL;CLCA2;DLG2;LOC102267568;RGS12;KRT6A;ARHGEF4
GO:0005730	nucleolus	cellular_component	1	46	634	16890	0.828357	0.842639	0.579139	RGS12
GO:0005654	nucleoplasm	cellular_component	1	46	1894	16890	0.995826	0.995826	0.193862	LOC102267568
GO:0004867	serine-type endopeptidase inhibitor activity	molecular_function	6	46	110	16890	5.04045e-07	2.97387e-05	20.0277	A2ML1;LOC102270717;LOC102283923;LOC102270133;LOC102267568;LOC102267682
GO:0002020	protease binding	molecular_function	4	46	58	16890	1.83443e-05	0.000541157	25.3223	LOC102270717;LOC102283923;LOC102267568;LOC102267682
GO:0005044	scavenger receptor activity	molecular_function	3	46	50	16890	0.000338783	0.00618201	22.0304	ENPP3;ENDOU;TMPRSS13
GO:0030247	polysaccharide binding	molecular_function	2	46	11	16890	0.000392925	0.00618201	66.7589	ENPP3;ENDOU
GO:0042834	peptidoglycan binding	molecular_function	2	46	11	16890	0.000392925	0.00618201	66.7589	PGLYRP3;PGLYRP4
GO:0030414	peptidase inhibitor activity	molecular_function	2	46	12	16890	0.000470692	0.00653431	61.1957	LOC102286772;A2ML1
GO:0005198	structural molecule activity	molecular_function	4	46	170	16890	0.00116283	0.0144436	8.63939	KRT5;KRT6A;LOC102282154;LOC102268548
GO:0004869	cysteine-type endopeptidase inhibitor activity	molecular_function	2	46	22	16890	0.0016191	0.0191054	33.3794	LOC102267568;LOC102267682
GO:0008236	serine-type peptidase activity	molecular_function	2	46	31	16890	0.00320884	0.0360613	23.6886	ENDOU;LOC102276824
GO:0005254	chloride channel activity	molecular_function	2	46	39	16890	0.00504322	0.0517478	18.8294	CLCA2;CLIC3
GO:0004252	serine-type endopeptidase activity	molecular_function	3	46	160	16890	0.00940055	0.076501	6.88451	LOC102276824;TMPRSS13;TMPRSS11D
GO:0008270	zinc ion binding	molecular_function	6	46	700	16890	0.0113247	0.0890879	3.1472	ENPP3;PGLYRP3;ZNF185;PGLYRP4;MARCH3;TRIM29
GO:0035529	NADH pyrophosphatase activity	molecular_function	1	46	5	16890	0.0135451	0.0890903	73.4348	ENPP3
GO:0004385	guanylate kinase activity	molecular_function	1	46	6	16890	0.0162326	0.0890903	61.1957	DLG2
GO:0004528	phosphodiesterase I activity	molecular_function	1	46	6	16890	0.0162326	0.0890903	61.1957	ENPP3
GO:0005243	gap junction channel activity	molecular_function	1	46	6	16890	0.0162326	0.0890903	61.1957	GJB2
GO:0030695	GTPase regulator activity	molecular_function	1	46	7	16890	0.0189128	0.092988	52.4534	RGS12
GO:0036312	phosphatidylinositol 3-kinase regulatory subunit binding	molecular_function	1	46	7	16890	0.0189128	0.092988	52.4534	FAM83B
GO:0047429	nucleoside-triphosphate diphosphatase activity	molecular_function	1	46	7	16890	0.0189128	0.092988	52.4534	ENPP3
GO:0005391	sodium:potassium-exchanging ATPase activity	molecular_function	1	46	8	16890	0.0215859	0.101885	45.8967	ATP1B3
GO:0030676	Rac guanyl-nucleotide exchange factor activity	molecular_function	1	46	9	16890	0.0242519	0.10599	40.7971	ARHGEF4
GO:0015276	ligand-gated ion channel activity	molecular_function	1	46	10	16890	0.0269108	0.107335	36.7174	CLCA2
GO:0045028	G protein-coupled purinergic nucleotide receptor activity	molecular_function	1	46	13	16890	0.0348449	0.115823	28.2441	GPR87
GO:0042802	identical protein binding	molecular_function	5	46	714	16890	0.0437851	0.129166	2.57125	TMEM79;BNIPL;GJB2;LOC102268572;TRIM29
GO:0001671	ATPase activator activity	molecular_function	1	46	19	16890	0.0505238	0.140278	19.3249	ATP1B3
GO:0005229	intracellular calcium activated chloride channel activity	molecular_function	1	46	20	16890	0.0531127	0.142438	18.3587	CLCA2
GO:0004521	endoribonuclease activity	molecular_function	1	46	22	16890	0.0582696	0.149474	16.6897	ENDOU
GO:0035255	ionotropic glutamate receptor binding	molecular_function	1	46	23	16890	0.0608377	0.149664	15.9641	DLG2
GO:0001618	virus receptor activity	molecular_function	1	46	24	16890	0.063399	0.149664	15.2989	LOC102267682
GO:0005154	epidermal growth factor receptor binding	molecular_function	1	46	25	16890	0.0659535	0.149664	14.687	FAM83B
GO:0017112	Rab guanyl-nucleotide exchange factor activity	molecular_function	1	46	32	16890	0.0836449	0.177278	11.4742	DENND2C
GO:1990841	promoter-specific chromatin binding	molecular_function	1	46	33	16890	0.0861454	0.177278	11.1265	ZNF750
GO:0019899	enzyme binding	molecular_function	2	46	185	16890	0.0903231	0.179128	3.96945	LOC102270717;LOC102283923
GO:0048365	Rac GTPase binding	molecular_function	1	46	38	16890	0.0985478	0.193811	9.66247	PAK6
GO:0005509	calcium ion binding	molecular_function	4	46	650	16890	0.0998641	0.194776	2.25953	ENPP3;LOC102265723;DSG3;LOC102266197
GO:0002039	p53 binding	molecular_function	1	46	41	16890	0.10591	0.202576	8.95546	TRIM29
GO:0051117	ATPase binding	molecular_function	1	46	42	16890	0.108351	0.204567	8.74224	ATP1B3
GO:0005244	voltage-gated ion channel activity	molecular_function	1	46	45	16890	0.115635	0.206369	8.15942	CLIC3
GO:0008233	peptidase activity	molecular_function	1	46	55	16890	0.139497	0.236843	6.67589	TMPRSS11D
GO:0019900	kinase binding	molecular_function	1	46	59	16890	0.148864	0.245678	6.22329	DLG2
GO:0005089	Rho guanyl-nucleotide exchange factor activity	molecular_function	1	46	66	16890	0.165017	0.264926	5.56324	ARHGEF4
GO:0016740	transferase activity	molecular_function	1	46	66	16890	0.165017	0.264926	5.56324	2022-03-03
GO:0005085	guanyl-nucleotide exchange factor activity	molecular_function	1	46	102	16890	0.24347	0.359118	3.59974	ARHGEF4
GO:0001228	DNA-binding transcription activator activity, RNA polymerase II-specific	molecular_function	1	46	103	16890	0.245543	0.359926	3.5648	PAX9
GO:0004222	metalloendopeptidase activity	molecular_function	1	46	105	16890	0.249672	0.361488	3.49689	CLCA2
GO:0046982	protein heterodimerization activity	molecular_function	2	46	401	16890	0.298513	0.402566	1.83129	PGLYRP3;PGLYRP4
GO:0045296	cadherin binding	molecular_function	1	46	140	16890	0.318455	0.424607	2.62267	PKP1
GO:0051015	actin filament binding	molecular_function	1	46	159	16890	0.35317	0.455454	2.30927	ZNF185
GO:0019904	protein domain specific binding	molecular_function	1	46	164	16890	0.362014	0.456646	2.23887	ARHGEF4
GO:0003714	transcription corepressor activity	molecular_function	1	46	165	16890	0.363769	0.456646	2.2253	LOC102268572
GO:0003676	nucleic acid binding	molecular_function	1	46	175	16890	0.381057	0.474913	2.09814	ENPP3
GO:0000977	RNA polymerase II regulatory region sequence-specific DNA binding	molecular_function	1	46	192	16890	0.409398	0.490447	1.91236	PAX9
GO:0001077	proximal promoter DNA-binding transcription activator activity, RNA polymerase II-specific	molecular_function	1	46	210	16890	0.438023	0.514296	1.74845	ZNF750
GO:0005096	GTPase activator activity	molecular_function	1	46	216	16890	0.447259	0.519967	1.69988	RGS12
GO:0008134	transcription factor binding	molecular_function	1	46	233	16890	0.47263	0.538844	1.57585	LOC102268572
GO:0019901	protein kinase binding	molecular_function	1	46	298	16890	0.559547	0.617071	1.23213	FAM83B
GO:0004674	protein serine/threonine kinase activity	molecular_function	1	46	307	16890	0.570419	0.617816	1.19601	PAK6
GO:0000978	RNA polymerase II proximal promoter sequence-specific DNA binding	molecular_function	1	46	322	16890	0.587958	0.630718	1.14029	ZNF750
GO:0004930	G protein-coupled receptor activity	molecular_function	1	46	380	16890	0.649419	0.681169	0.966247	ADGRF4
GO:0003700	DNA-binding transcription factor activity	molecular_function	1	46	471	16890	0.728219	0.757091	0.779562	PAX9
GO:0003723	RNA binding	molecular_function	1	46	847	16890	0.90651	0.918182	0.433499	ENDOU
GO:0046872	metal ion binding	molecular_function	3	46	2001	16890	0.92198	0.929861	0.550486	ENDOU;CLCA2;ZNF750
GO:0005524	ATP binding	molecular_function	1	46	1293	16890	0.97449	0.978636	0.283971	PAK6
