# Supplementary material for: Transcriptome profiling in rumen, reticulum, omasum, and abomasum tissues during the developmental transition of pre-ruminant to the ruminant in yaks
Source: Frontiers journal article supplement (doi:10.3389/fvets.2023.1204706), 2023-09-22
Supplement: Data_Sheet_1.zip [file Table S21-The KEGG enrichment in turquoise module of WGCNA.xls]

id	Term	Classification_level1	Classification_level2	ListHits	p-value	Enrichment_score	geneID	hyperlink_only_excel
bom04950	Maturity onset diabetes of the young	Human Diseases	Endocrine and metabolic disease	5	7.88225373982564e-09	67.2769230769231	HNF1A;HNF1B;HNF4A;FOXA3;HNF4G	=HYPERLINK("../../3.KEGG_map/turquoise_Hub_genes/bom04950.html","bom04950")
bom04971	Gastric acid secretion	Organismal Systems	Digestive system	5	3.19364088504643e-06	21.0240384615385	KCNJ16;SLC9A4;SLC9A1;CCKBR;KCNQ1	=HYPERLINK("../../3.KEGG_map/turquoise_Hub_genes/bom04971.html","bom04971")
bom00600	Sphingolipid metabolism	Metabolism	Lipid metabolism	2	0.00953743240984842	13.4553846153846	UGT8;GAL3ST1	=HYPERLINK("../../3.KEGG_map/turquoise_Hub_genes/bom00600.html","bom00600")
bom00565	Ether lipid metabolism	Metabolism	Lipid metabolism	2	0.0110605470486178	12.4586894586895	UGT8;GAL3ST1	=HYPERLINK("../../3.KEGG_map/turquoise_Hub_genes/bom00565.html","bom00565")
bom04972	Pancreatic secretion	Organismal Systems	Digestive system	2	0.0378149219145702	6.4689349112426	SLC9A1;KCNQ1	=HYPERLINK("../../3.KEGG_map/turquoise_Hub_genes/bom04972.html","bom04972")
bom00603	Glycosphingolipid biosynthesis - globo and isoglobo series	Metabolism	Glycan biosynthesis and metabolism	1	0.0493973045175773	19.7873303167421	B3GALT5	=HYPERLINK("../../3.KEGG_map/turquoise_Hub_genes/bom00603.html","bom00603")
bom04261	Adrenergic signaling in cardiomyocytes	Organismal Systems	Circulatory system	2	0.077749918309662	4.31262327416174	SLC9A1;KCNQ1	=HYPERLINK("../../3.KEGG_map/turquoise_Hub_genes/bom04261.html","bom04261")
bom00650	Butanoate metabolism	Metabolism	Carbohydrate metabolism	1	0.0828442288865622	11.5994694960212	ACSM3	=HYPERLINK("../../3.KEGG_map/turquoise_Hub_genes/bom00650.html","bom00650")
bom00601	Glycosphingolipid biosynthesis - lacto and neolacto series	Metabolism	Glycan biosynthesis and metabolism	1	0.0883075422688947	10.8511166253102	B3GALT5	=HYPERLINK("../../3.KEGG_map/turquoise_Hub_genes/bom00601.html","bom00601")
bom00512	Mucin type O-glycan biosynthesis	Metabolism	Glycan biosynthesis and metabolism	1	0.0964438799012355	9.89366515837104	GALNT5	=HYPERLINK("../../3.KEGG_map/turquoise_Hub_genes/bom00512.html","bom00512")
bom04530	Tight junction	Cellular Processes	Cellular community - eukaryotes	2	0.0964841057537407	3.80095610604085	CLDN18;IGSF5	=HYPERLINK("../../3.KEGG_map/turquoise_Hub_genes/bom04530.html","bom04530")
bom05205	Proteoglycans in cancer	Human Diseases	Cancer: overview	2	0.122253531290134	3.29788838612368	IHH;SLC9A1	=HYPERLINK("../../3.KEGG_map/turquoise_Hub_genes/bom05205.html","bom05205")
bom00514	Other types of O-glycan biosynthesis	Metabolism	Glycan biosynthesis and metabolism	1	0.128296531247644	7.31270903010033	GALNT5	=HYPERLINK("../../3.KEGG_map/turquoise_Hub_genes/bom00514.html","bom00514")
bom00260	Glycine, serine and threonine metabolism	Metabolism	Amino acid metabolism	1	0.130901622073801	7.15711947626841	CHDH	=HYPERLINK("../../3.KEGG_map/turquoise_Hub_genes/bom00260.html","bom00260")
bom04340	Hedgehog signaling pathway	Environmental Information Processing	Signal transduction	1	0.15401300309723	6.00686813186813	IHH	=HYPERLINK("../../3.KEGG_map/turquoise_Hub_genes/bom04340.html","bom04340")
bom04024	cAMP signaling pathway	Environmental Information Processing	Signal transduction	2	0.157853716976923	2.81493401995494	SLC9A1;LOC102275331	=HYPERLINK("../../3.KEGG_map/turquoise_Hub_genes/bom04024.html","bom04024")
bom04940	Type I diabetes mellitus	Human Diseases	Endocrine and metabolic disease	1	0.164093973276357	5.60641025641026	PTPRN2	=HYPERLINK("../../3.KEGG_map/turquoise_Hub_genes/bom04940.html","bom04940")
bom04020	Calcium signaling pathway	Environmental Information Processing	Signal transduction	2	0.171563262029201	2.66971916971917	ITPKA;CCKBR	=HYPERLINK("../../3.KEGG_map/turquoise_Hub_genes/bom04020.html","bom04020")
bom00310	Lysine degradation	Metabolism	Amino acid metabolism	1	0.176532829372671	5.17514792899408	PRDM16	=HYPERLINK("../../3.KEGG_map/turquoise_Hub_genes/bom00310.html","bom00310")
bom00562	Inositol phosphate metabolism	Metabolism	Carbohydrate metabolism	1	0.193648600483149	4.67200854700855	ITPKA	=HYPERLINK("../../3.KEGG_map/turquoise_Hub_genes/bom00562.html","bom00562")
