# Supplementary material for: Transcriptome profiling in rumen, reticulum, omasum, and abomasum tissues during the developmental transition of pre-ruminant to the ruminant in yaks
Source: Frontiers journal article supplement (doi:10.3389/fvets.2023.1204706), 2023-09-22
Supplement: Data_Sheet_1.zip [file Table S22-The KEGG enrichment in blue module of WGCNA.xls]

id	Term	Classification_level1	Classification_level2	ListHits	p-value	Enrichment_score	geneID	hyperlink_only_excel
bom05412	Arrhythmogenic right ventricular cardiomyopathy	Human Diseases	Cardiovascular disease	2	0.00518636639411008	18.1829521829522	DSP;LOC102266197	=HYPERLINK("../../3.KEGG_map/blue_Hub_genes/bom05412.html","bom05412")
bom04972	Pancreatic secretion	Organismal Systems	Digestive system	2	0.0100292325391031	12.9378698224852	CLCA2;ATP1B3	=HYPERLINK("../../3.KEGG_map/blue_Hub_genes/bom04972.html","bom04972")
bom00740	Riboflavin metabolism	Metabolism	Metabolism of cofactors and vitamins	1	0.0118341835690942	84.0961538461539	ENPP3	=HYPERLINK("../../3.KEGG_map/blue_Hub_genes/bom00740.html","bom00740")
bom00770	Pantothenate and CoA biosynthesis	Metabolism	Metabolism of cofactors and vitamins	1	0.029343253343067	33.6384615384615	ENPP3	=HYPERLINK("../../3.KEGG_map/blue_Hub_genes/bom00770.html","bom00770")
bom04964	Proximal tubule bicarbonate reclamation	Organismal Systems	Excretory system	1	0.0322334344574611	30.5804195804196	ATP1B3	=HYPERLINK("../../3.KEGG_map/blue_Hub_genes/bom04964.html","bom04964")
bom04810	Regulation of actin cytoskeleton	Cellular Processes	Cell motility	2	0.040264750665555	6.17219477769936	ARHGEF4;PAK6	=HYPERLINK("../../3.KEGG_map/blue_Hub_genes/bom04810.html","bom04810")
bom00500	Starch and sucrose metabolism	Metabolism	Carbohydrate metabolism	1	0.0479879404912489	20.3869463869464	ENPP3	=HYPERLINK("../../3.KEGG_map/blue_Hub_genes/bom00500.html","bom00500")
bom00760	Nicotinate and nicotinamide metabolism	Metabolism	Metabolism of cofactors and vitamins	1	0.0536579084573272	18.1829521829522	ENPP3	=HYPERLINK("../../3.KEGG_map/blue_Hub_genes/bom00760.html","bom00760")
bom04960	Aldosterone-regulated sodium reabsorption	Organismal Systems	Excretory system	1	0.0536579084573272	18.1829521829522	ATP1B3	=HYPERLINK("../../3.KEGG_map/blue_Hub_genes/bom04960.html","bom04960")
bom04973	Carbohydrate digestion and absorption	Organismal Systems	Digestive system	1	0.0649044445361505	14.9504273504274	ATP1B3	=HYPERLINK("../../3.KEGG_map/blue_Hub_genes/bom04973.html","bom04973")
bom04060	Cytokine-cytokine receptor interaction	Environmental Information Processing	Signaling molecules and interaction	2	0.0696438152488915	4.54573804573805	IL1RL2;IL20RB	=HYPERLINK("../../3.KEGG_map/blue_Hub_genes/bom04060.html","bom04060")
bom04961	Endocrine and other factor-regulated calcium reabsorption	Organismal Systems	Excretory system	1	0.0732582393354405	13.1915535444947	ATP1B3	=HYPERLINK("../../3.KEGG_map/blue_Hub_genes/bom04961.html","bom04961")
bom00240	Pyrimidine metabolism	Metabolism	Nucleotide metabolism	1	0.0774092529050627	12.4586894586895	ENPP3	=HYPERLINK("../../3.KEGG_map/blue_Hub_genes/bom00240.html","bom00240")
bom04978	Mineral absorption	Organismal Systems	Digestive system	1	0.0992596157568622	9.61098901098901	ATP1B3	=HYPERLINK("../../3.KEGG_map/blue_Hub_genes/bom04978.html","bom04978")
bom05211	Renal cell carcinoma	Human Diseases	Cancer: specific types	1	0.10060927285635	9.47562296858072	PAK6	=HYPERLINK("../../3.KEGG_map/blue_Hub_genes/bom05211.html","bom05211")
bom04918	Thyroid hormone synthesis	Organismal Systems	Endocrine system	1	0.105989255308372	8.97025641025641	ATP1B3	=HYPERLINK("../../3.KEGG_map/blue_Hub_genes/bom04918.html","bom04918")
bom04924	Renin secretion	Organismal Systems	Endocrine system	1	0.110004730044262	8.62524654832347	CLCA2	=HYPERLINK("../../3.KEGG_map/blue_Hub_genes/bom04924.html","bom04924")
bom04971	Gastric acid secretion	Organismal Systems	Digestive system	1	0.112672457053966	8.40961538461539	ATP1B3	=HYPERLINK("../../3.KEGG_map/blue_Hub_genes/bom04971.html","bom04971")
bom04012	ErbB signaling pathway	Environmental Information Processing	Signal transduction	1	0.117985780794	8.00915750915751	PAK6	=HYPERLINK("../../3.KEGG_map/blue_Hub_genes/bom04012.html","bom04012")
bom04061	Viral protein interaction with cytokine and cytokine receptor	Environmental Information Processing	Signaling molecules and interaction	1	0.119309514902714	7.91493212669683	IL20RB	=HYPERLINK("../../3.KEGG_map/blue_Hub_genes/bom04061.html","bom04061")
